# Supplementary material for: Investigating core genetic-and-epigenetic cell cycle networks for stemness and carcinogenic mechanisms, and cancer drug design using big database mining and genome-wide next-generation sequencing data
Source: PubMed Central journal article supplement — Cell Cycle. 2016 Jun 13;15(19):2593–607. doi: 10.1080/15384101.2016.1198862 (PMC5053590; doi:10.1080/15384101.2016.1198862), 2016-06-13
Supplement: kccy-15-19-1198862-s001.pdf [file kccy-15-19-1198862-s001.pdf]

## Supplemental Information

**Table S1. Cell cycle genes for HeLa cell.**

There are 303 cell cycle genes, in which 46 in G1, 76 in S, 96 in G2, and 85 in M phase are selected.

| <b>GeneName</b> | <b>GeneName</b> |
|-----------------|-----------------|
| <i>G1 phase</i> | <i>G2 phase</i> |
| CASP8AP2        | EXPH5           |
| CCNE1           | FAM222A-AS1     |
| CCNE2           | FAM64A          |
| CDH10           | FAM72A          |
| CFI             | FAM72B          |
| DTL             | FAM72C          |
| FAM111B         | FAM72D          |
| FBXL20          | FAM83D          |
| HIST1H2AG       | FHL1            |
| HIST1H2AH       | FZR1            |
| HIST1H2BD       | G2E3            |
| HIST1H2BG       | GAS2L3          |
| HIST1H2BJ       | GOLGA8B         |
| HIST1H2BO       | GTSE1           |
| HIST1H3H        | HJURP           |
| HIST1H4D        | INCENP          |
| HIST1H4H        | IQGAP3          |
| HIST1H4I        | KIF11           |
| HIST2H2BD       | KIF14           |
| HIST2H4A        | KIF18A          |
| HIST2H4B        | KIF18B          |
| HIST4H4         | KIF20B          |
| KRCC1           | KIF23           |
| LOC102723826    | KIF2C           |
| LURAP1L         | KNSTRN          |
| MAB21L3         | KRTAP4-8        |
| MBD5            | KRTAP4-9        |
| MDM1            | LOC100288637    |

|                |              |
|----------------|--------------|
| MSH6           | LOC100996750 |
| NBPF4          | LOC101929815 |
| OR2B6          | LOC101930568 |
| OR2W6P         | LOC101930583 |
| ORC1           | LOC102723860 |
| PTGS2          | LRIF1        |
| RNU6-1293P     | METTL4       |
| RNU6-458P      | MTFR2        |
| RNY4P9         | NCF1C        |
| SSTR5-AS1      | NDE1         |
| TNS2           | NT5DC3       |
| UGT2A1         | NUF2         |
| UGT2A2         | PIF1         |
| UGT2B11        | PLK1         |
| USP37          | PSRC1        |
| WDR76          | RACGAP1P     |
| ZBTB14         | REEP4        |
| ZNF367         | RN7SL472P    |
| <i>S phase</i> | RNF185-AS1   |
| ABL2           | RNU6-418P    |
| ANKRD1         | RNY4P23      |
| APOA1          | RTKN2        |
| AREG           | SGOL2        |
| ARID5B         | SH2D2A       |
| BIRC3          | SKA1         |
| BOLA1          | STAMBPL1     |
| C8orf4         | STK17B       |
| CCL2           | THBS1        |
| CDSN           | TMPRSS11E    |
| CFB            | TNFAIP8L1    |
| CFC1           | TOP2A        |
| CFC1B          | TPTE2        |
| CLEC18A        | TROAP        |
| CLEC18B        | TTK          |
| CLEC18C        | UBALD2       |
| CTGF           | UBE2C        |

|            |                       |
|------------|-----------------------|
| DAPP1      | USP2                  |
| DKK1       | ZMYM1                 |
| EDNRA      | ZNF165                |
| FBXO5      | <b><i>M phase</i></b> |
| GRAMD3     | ALPP                  |
| HIST1H1B   | AMY1A                 |
| HIST1H1C   | AMY1B                 |
| HIST1H1E   | AMY1C                 |
| HIST1H2AB  | AMY2A                 |
| HIST1H2AC  | ATF7IP                |
| HIST1H2AD  | BTG2                  |
| HIST1H2AE  | CIT                   |
| HIST1H2AJ  | CLEC2D                |
| HIST1H2AL  | CTC-338M12.4          |
| HIST1H2BC  | CTDNEP1               |
| HIST1H2BF  | CYP4F30P              |
| HIST1H2BH  | CYP4F62P              |
| HIST1H2BI  | DAZ2                  |
| HIST1H2BK  | DAZ3                  |
| HIST1H2BL  | DAZ4                  |
| HIST1H2BM  | DDIT3                 |
| HIST1H3A   | EBLN2                 |
| HIST1H3B   | EFCAB12               |
| HIST1H3F   | EIF3D                 |
| HIST1H4A   | ENOX1                 |
| HIST1H4B   | FAR2P1                |
| HIST1H4C   | FNDC7                 |
| HIST1H4E   | HLA-DOB               |
| HIST1H4L   | HMMR                  |
| HIST2H2AA3 | HNF1B                 |
| HIST2H2AA4 | HNRNPM                |
| HIST2H2AB  | HSPA1A                |
| HIST2H2AC  | IFI44                 |
| HIST2H2BC  | IGJ                   |
| HIST2H2BE  | IK                    |
| HIST2H3DP1 | KIF20A                |

|                        |              |
|------------------------|--------------|
| HIST3H2A               | LINC00652    |
| IL6                    | LOC101060275 |
| KLRC4                  | LOC102723891 |
| KRT18P49               | LOC102725346 |
| LIPH                   | LOC440910    |
| LOC100134368           | LRRC39       |
| LOC102724334           | METTL2B      |
| MYB                    | NPIPB11      |
| NEDD9                  | NPIPB3       |
| NR4A1                  | PLGLB2       |
| OCM2                   | PRKCA        |
| OR2T3                  | PRR11        |
| OR2T34                 | PRR13        |
| PDK4                   | PSD3         |
| PHLDA1                 | RASA3        |
| RN7SL838P              | RN7SL12P     |
| RNF144B                | RN7SL230P    |
| RNFT1                  | RN7SL251P    |
| RP11-196G18.3          | RN7SL390P    |
| SYBU                   | RN7SL444P    |
| TMEM52B                | RN7SL809P    |
| TRAPPC3L               | RNPS1        |
| UBD                    | RNU2-62P     |
| <b><i>G2 phase</i></b> | RNU4-85P     |
| AC004066.2             | RNU4-87P     |
| ARHGAP11A              | RNU6-1078P   |
| ASPM                   | RNU6-1285P   |
| AURKA                  | RNU6-1319P   |
| AURKB                  | RNU6-302P    |
| BORA                   | RNU6-446P    |
| BRD8                   | RNU6-577P    |
| BUB1B                  | RNU6-637P    |
| C9orf152               | RNU6-670P    |
| CASC5                  | RNU6-719P    |
| CCNA2                  | RNU6-747P    |
| CCNF                   | RNU6-912P    |

|         |               |
|---------|---------------|
| CDC25C  | RNU6-944P     |
| CDCA2   | ROR2          |
| CDCA3   | RP11-109M19.3 |
| CDCA8   | RP11-182N22.9 |
| CDH5    | RP11-206L10.5 |
| CDK1    | SKP1          |
| CENPA   | SLC10A5       |
| CENPE   | SMTN          |
| CKAP2   | SNX3          |
| CKAP2L  | STARD8        |
| CYP1B1  | TBC1D3P2      |
| DBF4    | TNS1          |
| DBF4B   | U7            |
| DEPDC1  | VAV2          |
| DEPDC1B | ZNF382        |
| DNAJB1  | ZNF383        |
| DRD5    | ZNFX1         |

**Table S2. Cell cycle genes for ESCs.**

There are 299 cell cycle genes, in which 105 in G1, 108 in S, 73 in G2, and 13 in M phase are selected.

| <b>GeneName</b> | <b>GeneName</b> |
|-----------------|-----------------|
| <i>G1 phase</i> | <i>S phase</i>  |
| ACLY            | PITPNA-AS1      |
| AHSA1           | POU5F1P3        |
| ATP5B           | PPIB            |
| BASP1           | PRDX1           |
| BCLAF1          | PSMA7           |
| CALR            | PSMB1           |
| CANX            | PSMB4           |
| CCT2            | RHOA            |
| CD24            | RNA45S5         |
| CLDN6           | RPL10A          |
| CTNNB1          | RPL11           |
| DANCR           | RPL12           |
| DDIT4           | RPL18           |
| DDX21           | RPL19           |
| DDX24           | RPL23           |
| DHCR24          | RPL23A          |
| DNMT3B          | RPL24           |
| EEF2            | RPL26           |
| EIF3A           | RPL27           |
| EIF4A1          | RPL3            |
| EIF4G2          | RPL30           |
| EZR             | RPL31           |
| FADS2           | RPL35           |
| FSCN1           | RPL35A          |
| FTH1            | RPL36           |
| FUS             | RPL37A          |
| G3BP2           | RPL38           |
| GAL             | RPL4            |
| GJA1            | RPL5            |
| GNAS            | RPL7A           |

|             |                        |
|-------------|------------------------|
| GPC4        | RPL8                   |
| H3F3B       | RPLP0                  |
| HIF1A       | RPN2                   |
| HMGCR       | RPS11                  |
| HNRNPA0     | RPS12                  |
| HNRNPAB     | RPS14                  |
| HNRNPH1     | RPS15A                 |
| HNRNPH3     | RPS16                  |
| HNRNPM      | RPS20                  |
| HNRNPU      | RPS21                  |
| HSP90AA1    | RPS24                  |
| HSP90AB1    | RPS25                  |
| HSP90B1     | RPS3                   |
| HSPA4       | RPS4X                  |
| HSPA5       | RPS6                   |
| HSPD1       | RPS7                   |
| HSPE1       | RPS8                   |
| ILF2        | SHFM1                  |
| KRT18       | SLIRP                  |
| KRT8        | SNRPB                  |
| LIN28A      | SNRPD2                 |
| LRRC75A-AS1 | SNRPN                  |
| LRRN1       | TBCA                   |
| MCM2        | TMEM258                |
| MCM5        | TMSB10                 |
| MCM6        | TPI1                   |
| MORF4L2     | UBB                    |
| MSH6        | UBL5                   |
| NASP        | UQCRH                  |
| NCL         | UQCRHL                 |
| NOLC1       | WDR34                  |
| NPM1        | YBX1                   |
| NTS         | YWHAE                  |
| OAZ1        | <b><i>G2 phase</i></b> |
| PABPC1      | ACTB                   |
| PARP1       | ACTG1                  |

|          |        |
|----------|--------|
| PCNA     | ANLN   |
| PLS3     | APOE   |
| PODXL    | ARPC4  |
| PPP1CC   | ATP5I  |
| PSIP1    | AURKA  |
| PTMA     | AURKB  |
| RNU6-28P | BSG    |
| RNU86    | BUB1   |
| RPL13A   | BUB1B  |
| RPL28    | BUB3   |
| RPLP2    | CALM2  |
| RPPH1    | CALU   |
| RPS15    | CCNB1  |
| RPS9     | CCT3   |
| RTN4     | CDCA8  |
| S100A11  | CDK1   |
| SCD      | CENPF  |
| SEPHS1   | CKAP5  |
| SERPINH1 | CKS2   |
| SET      | COX8A  |
| SFRP2    | CSDE1  |
| SLC16A1  | DDX17  |
| SLC1A5   | DLGAP5 |
| SLC25A3  | ESRG   |
| SLC2A1   | FAM83D |
| SLC2A3   | FDFT1  |
| SLC7A5   | FTL    |
| SNHG5    | H1FX   |
| SOX2     | H2AFX  |
| SRSF2    | HJURP  |
| STRAP    | HMGB2  |
| TMED2    | HMMR   |
| TMSB4X   | HN1    |
| TRIM28   | INCENP |
| TUBB2A   | KIF23  |
| UGP2     | KIF2C  |



|                |                |
|----------------|----------------|
| UNG            | KPNA2          |
| VIM            | LINC00458      |
| YWHAZ          | MALAT1         |
| <i>S phase</i> | METTL5         |
| ALDOA          | MIF            |
| APEX1          | MKI67          |
| BTF3           | MYL6           |
| CAPNS1         | NCAPD2         |
| CD63           | NDUFA13        |
| CDK2AP1        | NUSAP1         |
| CFL1           | PKM            |
| COX4I1         | PLK1           |
| COX7C          | PRC1           |
| CPNE1          | PSRC1          |
| EDARADD        | RACGAP1        |
| EIF3I          | RMRP           |
| EIF5A          | RPL29          |
| ENO1           | RPLP1          |
| ENSA           | RPS29          |
| ERH            | RPS5           |
| FAU            | TACC3          |
| FDPS           | TCEAL8         |
| GAPDH          | THY1           |
| GNB2L1         | TKT            |
| GSTP1          | TOP2A          |
| H1F0           | TPM3           |
| H2AFZ          | TPX2           |
| HDGF           | TUBA1B         |
| HMGA1          | TUBA1C         |
| HNRNPA2B1      | TUBB2B         |
| HNRNPD         | TUBB4B         |
| IGFBP2         | UBC            |
| ITM2C          | UBE2C          |
| LDHA           | UCHL1          |
| LDHB           | YAP1           |
| MARCKSL1       | <i>M phase</i> |

|        |          |
|--------|----------|
| MCM3   | ARL6IP1  |
| MCM4   | CCNB2    |
| MCM7   | CDC20    |
| MRPL51 | DYNLL1   |
| NACA   | FLNA     |
| NDUFS5 | HSPA8    |
| NME2   | KIF20A   |
| PARK7  | PCBP2    |
| PCBP1  | PTTG1    |
| PEBP1  | SERBP1   |
| PFDN5  | SFPQ     |
| PFN1   | TAF6     |
| PGK1   | VTRNA1-3 |

**Table S3. The membranes of signaling pathways from DAVID and literatures.**

The TFs and miRNAs involved in transduction of signals in the signaling pathways.

| <b>Pathways</b>                                          | <b>TFs/miRNAs</b>                                                                         | <b>Reference</b>                                                                                                           |
|----------------------------------------------------------|-------------------------------------------------------------------------------------------|----------------------------------------------------------------------------------------------------------------------------|
| Steroid biosynthesis                                     | FOXJ2, SOAT1                                                                              | (Dubey and Saini, 2015)                                                                                                    |
| Fanconi anemia pathway                                   | RUNX1, TELO2                                                                              | (Wang et al., 2014)                                                                                                        |
| Ras signaling pathway                                    | ETS2, MAZ, NFIL3, NFKB1, RELA, TFAP2C                                                     | (Kuribara et al., 1999)                                                                                                    |
| NFκB signaling pathway                                   | <b>miR-98</b> , NFKB1, RELA                                                               | (Li et al., 2014)                                                                                                          |
| FOXO signaling pathway                                   | NFIL3, STAT3, USP7                                                                        | (Keniry et al., 2013)                                                                                                      |
| PI3K-Akt signaling pathway                               | <b>miR-17</b> , <b>miR-29C</b> , <b>miR-34A</b> , HOXA4, NFIL3, NFKB1, PAX4, PLXNA2, RELA | (Bhatlekar et al., 2014; Brun and Gauthier, 2008; Fan et al., 2014; Oh et al., 2012; Rathod et al., 2014; Yu et al., 2014) |
| Signaling pathways regulating pluripotency of stem cells | ONECUT1, STAT3, TCF3                                                                      | X                                                                                                                          |
| Prolactin signaling pathway                              | ESR1, NFKB1, RELA, STAT3, STAT5A, STAT5B                                                  | X                                                                                                                          |
| Transcriptional misregulation in cancer                  | NFKB1, RELA, RUNX1, TCF3, ZEB1                                                            | X                                                                                                                          |
| TGF-β pathway                                            | <b>miR-192</b> , <b>miR-215</b> , E2F1, REPIN1                                            | (Petrocca et al., 2008; Senanayake et al., 2012; Wang et al., 2015)                                                        |
| mRNA surveillance pathway                                | TFAP2C                                                                                    | X                                                                                                                          |
| Wnt/β-catenin pathway                                    | RUNX1, VSX2                                                                               | (Stephens et al., 2010; Wang et al., 2014)                                                                                 |
| <i>unknow</i>                                            | <b>miR-935</b> , ZNF165                                                                   | X                                                                                                                          |

**Table S4. The summarized pathways and functions in the carcinogenic mechanisms of HeLa cells, described in Fig. 6.**

|                 | <b>G1 phase</b>       | <b>S phase</b>                                 | <b>G2 phase</b>        | <b>M phase</b>            |
|-----------------|-----------------------|------------------------------------------------|------------------------|---------------------------|
| <b>Pathway</b>  | PI3K-Akt pathway      | PI3K-Akt pathway                               | PI3K-Akt pathway       | PI3K-Akt pathway          |
|                 | TGF- $\beta$ pathway  | TGF- $\beta$ pathway                           | PI3K-Akt pathway       | Ras-MAPK pathway          |
|                 | NK $\kappa$ B pathway | Ras-MAPK pathway                               | Ras-MAPK pathway       | mRNA surveillance pathway |
|                 |                       | NK $\kappa$ B pathway                          |                        |                           |
|                 |                       | Steroid biosynthesis                           |                        |                           |
|                 |                       | Fanconi anemia pathway                         |                        |                           |
|                 |                       | FOXO pathway                                   |                        |                           |
|                 |                       | Pathways regulating pluripotency of stem cells |                        |                           |
|                 |                       | Prolactin pathway                              |                        |                           |
|                 |                       | Transcriptional misregulation in cancer        |                        |                           |
|                 |                       | Wnt/ $\beta$ -catenin pathway                  |                        |                           |
|                 | Unknown               |                                                |                        |                           |
| <b>Function</b> | DNA replication       | DNA replication                                | DNA replication        | Cell proliferation        |
|                 | Invasion ability      | Anti-apoptosis                                 | Anti-apoptosis         |                           |
|                 |                       | Histone demethylation                          | Invasion ability       |                           |
|                 |                       |                                                | Cell proliferation     |                           |
|                 |                       |                                                | Chromosome alignment   |                           |
|                 |                       |                                                | Chromosome instability |                           |
|                 |                       |                                                | DNA repair             |                           |
|                 |                       |                                                | Immortal ability       |                           |
|                 |                       |                                                | Spindle assembly       |                           |
|                 |                       |                                                | Spindle checkpoint     |                           |
|                 |                       |                                                | Deubiquitination       |                           |
|                 |                       | Unknown                                        |                        |                           |

**Table S5. Full results of Table 2.**

| batch      | cmap name           | dose                        | cell        | score        | up           | down          | instance_id |
|------------|---------------------|-----------------------------|-------------|--------------|--------------|---------------|-------------|
| <b>695</b> | <b>quercetin</b>    | <b>12 <math>\mu</math>M</b> | <b>MCF7</b> | <b>0.661</b> | <b>0.076</b> | <b>-0.229</b> | <b>4846</b> |
| <b>613</b> | <b>methotrexate</b> | <b>9 <math>\mu</math>M</b>  | <b>HL60</b> | <b>0.434</b> | <b>0.063</b> | <b>-0.137</b> | <b>2041</b> |
| <b>714</b> | <b>mimosine</b>     | <b>20 <math>\mu</math>M</b> | <b>PC3</b>  | <b>0.41</b>  | <b>0.047</b> | <b>-0.143</b> | <b>6703</b> |
| <b>693</b> | <b>quercetin</b>    | <b>12 <math>\mu</math>M</b> | <b>PC3</b>  | <b>0.268</b> | <b>0.057</b> | <b>-0.067</b> | <b>4264</b> |
| 732        | ellipticine         | 16 $\mu$ M                  | PC3         | 1            | 0.208        | -0.254        | 5779        |
| 662        | ellipticine         | 16 $\mu$ M                  | MCF7        | 0.958        | 0.165        | -0.277        | 2758        |
| 699        | 0175029-0000        | 10 $\mu$ M                  | MCF7        | 0.931        | 0.133        | -0.297        | 4713        |
| 706        | daunorubicin        | 7 $\mu$ M                   | MCF7        | 0.926        | 0.127        | -0.301        | 4983        |
| 730        | mitoxantrone        | 8 $\mu$ M                   | MCF7        | 0.9          | 0.123        | -0.293        | 5354        |
| 687        | camptothecin        | 11 $\mu$ M                  | MCF7        | 0.89         | 0.104        | -0.307        | 3887        |
| 657        | imipenem            | 13 $\mu$ M                  | MCF7        | 0.887        | 0.165        | -0.245        | 2873        |
| 642        | camptothecin        | 11 $\mu$ M                  | MCF7        | 0.885        | 0.123        | -0.286        | 2321        |
| 708        | doxorubicin         | 7 $\mu$ M                   | MCF7        | 0.88         | 0.136        | -0.27         | 5671        |
| 1050       | 0175029-0000        | 10 $\mu$ M                  | PC3         | 0.879        | 0.139        | -0.267        | 6875        |
| 703        | camptothecin        | 11 $\mu$ M                  | PC3         | 0.865        | 0.102        | -0.297        | 4541        |
| 644        | conessine           | 11 $\mu$ M                  | HL60        | 0.86         | 0.146        | -0.251        | 2135        |
| 662        | pyridoxine          | 19 $\mu$ M                  | MCF7        | 0.848        | 0.15         | -0.242        | 2751        |
| 629        | meticrane           | 15 $\mu$ M                  | HL60        | 0.844        | 0.109        | -0.281        | 1834        |
| 687        | ethotoin            | 20 $\mu$ M                  | MCF7        | 0.843        | 0.121        | -0.268        | 3892        |
| 629        | allantoin           | 25 $\mu$ M                  | HL60        | 0.836        | 0.11         | -0.276        | 1842        |
| 672        | suprofen            | 15 $\mu$ M                  | MCF7        | 0.832        | 0.128        | -0.256        | 3343        |
| 647        | mitoxantrone        | 8 $\mu$ M                   | MCF7        | 0.829        | 0.116        | -0.267        | 3232        |
| 1013       | H-7                 | 100 $\mu$ M                 | PC3         | 0.828        | 0.128        | -0.254        | 5968        |
| 1067       | alsterpallone       | 10 $\mu$ M                  | PC3         | 0.827        | 0.119        | -0.263        | 7056        |
| 751        | benfotiamine        | 9 $\mu$ M                   | MCF7        | 0.826        | 0.152        | -0.23         | 6032        |
| 1074       | GW-8510             | 10 $\mu$ M                  | MCF7        | 0.823        | 0.104        | -0.276        | 7080        |
| 655        | doxorubicin         | 7 $\mu$ M                   | MCF7        | 0.822        | 0.084        | -0.296        | 3291        |
| 695        | salsolidin          | 16 $\mu$ M                  | MCF7        | 0.821        | 0.106        | -0.273        | 4810        |
| 751        | isosorbide          | 17 $\mu$ M                  | MCF7        | 0.818        | 0.118        | -0.26         | 6038        |
| 680        | 0175029-0000        | 10 $\mu$ M                  | PC3         | 0.818        | 0.1          | -0.278        | 3691        |
| 1073       | alsterpallone       | 10 $\mu$ M                  | PC3         | 0.817        | 0.126        | -0.252        | 7078        |
| 746        | ellipticine         | 16 $\mu$ M                  | MCF7        | 0.817        | 0.091        | -0.287        | 6253        |
| 708        | altretamine         | 19 $\mu$ M                  | MCF7        | 0.815        | 0.155        | -0.221        | 5688        |
| 695        | seneciphylline      | 12 $\mu$ M                  | MCF7        | 0.814        | 0.111        | -0.265        | 4822        |
| 1012       | H-7                 | 100 $\mu$ M                 | MCF7        | 0.814        | 0.11         | -0.266        | 5963        |

|      |                      |        |      |       |       |        |      |
|------|----------------------|--------|------|-------|-------|--------|------|
| 662  | tomatidine           | 10 µM  | MCF7 | 0.811 | 0.105 | -0.27  | 2746 |
| 657  | trimetazidine        | 12 µM  | MCF7 | 0.811 | 0.148 | -0.227 | 2876 |
| 706  | theobromine          | 22 µM  | MCF7 | 0.81  | 0.154 | -0.22  | 4958 |
| 707  | ketanserin           | 7 µM   | MCF7 | 0.809 | 0.099 | -0.274 | 4995 |
| 662  | ipratropium bromide  | 10 µM  | MCF7 | 0.807 | 0.141 | -0.232 | 2762 |
| 672  | azacitidine          | 16 µM  | MCF7 | 0.806 | 0.115 | -0.258 | 3348 |
| 708  | ritodrine            | 12 µM  | MCF7 | 0.803 | 0.148 | -0.223 | 5680 |
| 751  | sulfamerazine        | 15 µM  | MCF7 | 0.801 | 0.113 | -0.257 | 6036 |
| 629  | sulfaphenazole       | 13 µM  | HL60 | 0.799 | 0.076 | -0.293 | 1836 |
| 657  | Trolox C             | 16 µM  | MCF7 | 0.798 | 0.126 | -0.243 | 2883 |
| 662  | atropine             | 6 µM   | MCF7 | 0.793 | 0.135 | -0.232 | 2761 |
| 1066 | alsterpauillone      | 10 µM  | MCF7 | 0.793 | 0.096 | -0.27  | 7051 |
| 1069 | GW-8510              | 10 µM  | PC3  | 0.792 | 0.086 | -0.28  | 7067 |
| 752  | cefuroxime           | 9 µM   | MCF7 | 0.791 | 0.129 | -0.237 | 6088 |
| 657  | propafenone          | 11 µM  | MCF7 | 0.787 | 0.112 | -0.252 | 2871 |
| 662  | lobeline             | 11 µM  | MCF7 | 0.787 | 0.108 | -0.255 | 2763 |
| 663  | harmaline            | 14 µM  | MCF7 | 0.786 | 0.128 | -0.235 | 2805 |
| 657  | mesoridazine         | 7 µM   | MCF7 | 0.783 | 0.121 | -0.241 | 2874 |
| 629  | morantel             | 11 µM  | HL60 | 0.782 | 0.061 | -0.3   | 1840 |
| 712  | doxorubicin          | 7 µM   | PC3  | 0.782 | 0.084 | -0.277 | 4610 |
| 749  | natamycin            | 6 µM   | HL60 | 0.781 | 0.119 | -0.242 | 6126 |
| 705  | piromidic acid       | 14 µM  | MCF7 | 0.78  | 0.091 | -0.27  | 4398 |
| 629  | chloramphenicol      | 12 µM  | HL60 | 0.78  | 0.072 | -0.289 | 1837 |
| 772  | 8-azaguanine         | 26 µM  | MCF7 | 0.778 | 0.09  | -0.269 | 7444 |
| 662  | physostigmine        | 6 µM   | MCF7 | 0.777 | 0.103 | -0.256 | 2768 |
| 662  | hydrocotarnine       | 13 µM  | MCF7 | 0.777 | 0.132 | -0.227 | 2765 |
| 711  | furaltadone          | 11 µM  | MCF7 | 0.777 | 0.123 | -0.236 | 3932 |
| 664  | sotalol              | 13 µM  | HL60 | 0.776 | 0.064 | -0.294 | 2918 |
| 687  | CP-320650-01         | 1 µM   | MCF7 | 0.775 | 0.085 | -0.273 | 3908 |
| 663  | corynanthine         | 10 µM  | MCF7 | 0.774 | 0.124 | -0.234 | 2786 |
| 743  | cycloserine          | 39 µM  | MCF7 | 0.774 | 0.124 | -0.234 | 6782 |
| 711  | eucatropine          | 12 µM  | MCF7 | 0.774 | 0.126 | -0.231 | 3935 |
| 772  | acetazolamide        | 18 µM  | MCF7 | 0.773 | 0.115 | -0.242 | 7461 |
| 655  | serotonin            | 19 µM  | MCF7 | 0.77  | 0.114 | -0.242 | 3311 |
| 757  | acetylsalicylic acid | 100 µM | MCF7 | 0.77  | 0.111 | -0.245 | 5564 |
| 719  | rimexolone           | 11 µM  | PC3  | 0.769 | 0.117 | -0.238 | 5092 |
| 720  | quinethazone         | 14 µM  | MCF7 | 0.769 | 0.109 | -0.246 | 4351 |

|      |                          |        |      |       |       |        |      |
|------|--------------------------|--------|------|-------|-------|--------|------|
| 751  | Prestwick-665            | 12 µM  | MCF7 | 0.768 | 0.106 | -0.248 | 6041 |
| 751  | ethotoin                 | 20 µM  | MCF7 | 0.768 | 0.133 | -0.222 | 6052 |
| 707  | (-)-MK-801               | 12 µM  | MCF7 | 0.767 | 0.096 | -0.258 | 5003 |
| 1007 | H-7                      | 100 µM | PC3  | 0.766 | 0.103 | -0.251 | 5941 |
| 629  | todralazine              | 15 µM  | HL60 | 0.766 | 0.067 | -0.287 | 1841 |
| 657  | gliclazide               | 12 µM  | MCF7 | 0.766 | 0.117 | -0.237 | 2870 |
| 664  | molindone                | 13 µM  | HL60 | 0.766 | 0.081 | -0.272 | 2917 |
| 700  | sulfamethoxyypyridazine  | 14 µM  | MCF7 | 0.765 | 0.075 | -0.278 | 4733 |
| 685  | 0179445-0000             | 1 µM   | MCF7 | 0.764 | 0.098 | -0.255 | 3633 |
| 665  | ioxaglic acid            | 3 µM   | HL60 | 0.762 | 0.121 | -0.231 | 2966 |
| 662  | DL-thiorphan             | 16 µM  | MCF7 | 0.762 | 0.102 | -0.25  | 2752 |
| 664  | gibberellic acid         | 12 µM  | HL60 | 0.761 | 0.086 | -0.266 | 2910 |
| 637  | hyoscyamine              | 14 µM  | MCF7 | 0.761 | 0.136 | -0.216 | 2271 |
| 1075 | GW-8510                  | 10 µM  | PC3  | 0.761 | 0.062 | -0.29  | 7085 |
| 664  | Prestwick-967            | 26 µM  | HL60 | 0.761 | 0.104 | -0.247 | 2925 |
| 748  | glibenclamide            | 8 µM   | MCF7 | 0.761 | 0.102 | -0.25  | 7202 |
| 726  | probucol                 | 8 µM   | MCF7 | 0.76  | 0.095 | -0.256 | 5261 |
| 664  | etamsylate               | 15 µM  | HL60 | 0.76  | 0.08  | -0.271 | 2915 |
| 695  | theophylline             | 20 µM  | MCF7 | 0.76  | 0.096 | -0.255 | 4812 |
| 663  | gelsemine                | 12 µM  | MCF7 | 0.759 | 0.124 | -0.226 | 2817 |
| 647  | methyl dopa              | 19 µM  | MCF7 | 0.759 | 0.081 | -0.269 | 3234 |
| 751  | betonicine               | 25 µM  | MCF7 | 0.758 | 0.102 | -0.249 | 6063 |
| 1006 | H-7                      | 100 µM | MCF7 | 0.758 | 0.125 | -0.225 | 5936 |
| 706  | dl-alpha tocopherol      | 9 µM   | MCF7 | 0.758 | 0.099 | -0.251 | 4961 |
| 654  | N-acetyl-L-aspartic acid | 23 µM  | MCF7 | 0.756 | 0.113 | -0.236 | 3265 |
| 672  | scopolamine              | 12 µM  | MCF7 | 0.755 | 0.109 | -0.24  | 3357 |
| 704  | apigenin                 | 15 µM  | PC3  | 0.755 | 0.085 | -0.263 | 4578 |
| 707  | glipizide                | 9 µM   | MCF7 | 0.754 | 0.099 | -0.25  | 4991 |
| 662  | pseudopelletierine       | 21 µM  | MCF7 | 0.753 | 0.152 | -0.195 | 2766 |
| 758  | dipyridamole             | 8 µM   | MCF7 | 0.752 | 0.102 | -0.246 | 5617 |
| 683  | chlorambucil             | 13 µM  | PC3  | 0.751 | 0.115 | -0.232 | 3788 |
| 663  | galantamine              | 11 µM  | MCF7 | 0.748 | 0.12  | -0.226 | 2787 |
| 662  | dacarbazine              | 22 µM  | MCF7 | 0.748 | 0.084 | -0.262 | 2754 |
| 743  | canrenoic acid           | 10 µM  | MCF7 | 0.748 | 0.143 | -0.203 | 6783 |
| 706  | apramycin                | 7 µM   | MCF7 | 0.748 | 0.105 | -0.24  | 4959 |
| 700  | sulfamerazine            | 15 µM  | MCF7 | 0.748 | 0.086 | -0.259 | 4740 |
| 662  | (+)-chelidone            | 11 µM  | MCF7 | 0.747 | 0.093 | -0.252 | 2779 |

|      |                       |        |      |       |       |        |      |
|------|-----------------------|--------|------|-------|-------|--------|------|
| 654  | bufloamedil           | 12 µM  | MCF7 | 0.746 | 0.087 | -0.258 | 3274 |
| 708  | N-acetyl-L-leucine    | 23 µM  | MCF7 | 0.746 | 0.138 | -0.206 | 5683 |
| 718  | roxarsone             | 15 µM  | PC3  | 0.746 | 0.098 | -0.247 | 5051 |
| 657  | laudanosine           | 11 µM  | MCF7 | 0.746 | 0.098 | -0.247 | 2890 |
| 749  | dexpropranolol        | 14 µM  | HL60 | 0.745 | 0.068 | -0.277 | 6130 |
| 708  | terguride             | 9 µM   | MCF7 | 0.744 | 0.129 | -0.214 | 5694 |
| 756  | aminocaproic acid     | 30 µM  | MCF7 | 0.744 | 0.073 | -0.27  | 6501 |
| 656  | benperidol            | 10 µM  | MCF7 | 0.742 | 0.111 | -0.232 | 2836 |
| 691  | sanguinarine          | 12 µM  | MCF7 | 0.742 | 0.107 | -0.235 | 4168 |
| 743  | Prestwick-1084        | 16 µM  | MCF7 | 0.741 | 0.095 | -0.247 | 6767 |
| 765  | valproic acid         | 1 mM   | MCF7 | 0.741 | 0.115 | -0.227 | 6969 |
| 656  | betahistine           | 17 µM  | MCF7 | 0.738 | 0.121 | -0.22  | 2833 |
| 726  | butyl hydroxybenzoate | 21 µM  | MCF7 | 0.737 | 0.124 | -0.216 | 5245 |
| 671  | corbadrine            | 22 µM  | MCF7 | 0.737 | 0.097 | -0.244 | 3450 |
| 685  | 0179445-0000          | 10 µM  | MCF7 | 0.736 | 0.118 | -0.222 | 3630 |
| 657  | phenindione           | 18 µM  | MCF7 | 0.736 | 0.115 | -0.225 | 2868 |
| 706  | pyrazinamide          | 32 µM  | MCF7 | 0.735 | 0.093 | -0.247 | 4962 |
| 676  | pancuronium bromide   | 5 µM   | MCF7 | 0.735 | 0.119 | -0.22  | 7329 |
| 672  | cefsulodin            | 7 µM   | MCF7 | 0.735 | 0.091 | -0.249 | 3328 |
| 663  | hydroxyachillin       | 14 µM  | MCF7 | 0.735 | 0.07  | -0.269 | 2812 |
| 654  | chlorogenic acid      | 11 µM  | MCF7 | 0.733 | 0.104 | -0.235 | 3282 |
| 707  | luteolin              | 14 µM  | MCF7 | 0.733 | 0.107 | -0.232 | 5004 |
| 657  | Prestwick-559         | 8 µM   | MCF7 | 0.732 | 0.093 | -0.245 | 2877 |
| 651  | cinoxacin             | 15 µM  | HL60 | 0.732 | 0.093 | -0.245 | 2722 |
| 654  | brompheniramine       | 9 µM   | MCF7 | 0.732 | 0.127 | -0.212 | 3271 |
| 757  | valproic acid         | 50 µM  | MCF7 | 0.732 | 0.125 | -0.213 | 5582 |
| 743  | ramipril              | 10 µM  | MCF7 | 0.731 | 0.075 | -0.262 | 6792 |
| 619  | flunarizine           | 8 µM   | HL60 | 0.731 | 0.115 | -0.223 | 2381 |
| 657  | budesonide            | 9 µM   | MCF7 | 0.731 | 0.119 | -0.218 | 2866 |
| 1091 | irinotecan            | 100 µM | PC3  | 0.73  | 0.096 | -0.242 | 7535 |
| 751  | solasodine            | 10 µM  | MCF7 | 0.73  | 0.074 | -0.263 | 6025 |
| 762  | epirizole             | 17 µM  | PC3  | 0.73  | 0.116 | -0.221 | 7292 |
| 662  | cytisine              | 21 µM  | MCF7 | 0.729 | 0.094 | -0.242 | 2759 |
| 665  | lymecycline           | 7 µM   | HL60 | 0.728 | 0.079 | -0.257 | 2953 |
| 757  | LY-294002             | 100 nM | MCF7 | 0.728 | 0.085 | -0.251 | 5576 |
| 664  | moxonidine            | 17 µM  | HL60 | 0.727 | 0.091 | -0.244 | 2923 |
| 664  | epitiostanol          | 13 µM  | HL60 | 0.726 | 0.069 | -0.266 | 2922 |



|     |                        |        |      |       |       |        |      |
|-----|------------------------|--------|------|-------|-------|--------|------|
| 695 | carcinine              | 22 µM  | MCF7 | 0.726 | 0.092 | -0.243 | 4809 |
| 663 | hydrogesterone         | 13 µM  | MCF7 | 0.725 | 0.107 | -0.228 | 2811 |
| 673 | 3-acetylcoumarin       | 21 µM  | MCF7 | 0.725 | 0.136 | -0.198 | 3382 |
| 718 | antimycin A            | 7 µM   | PC3  | 0.725 | 0.09  | -0.245 | 5053 |
| 705 | pancuronium bromide    | 5 µM   | MCF7 | 0.724 | 0.113 | -0.221 | 4393 |
| 766 | moxisylyte             | 13 µM  | MCF7 | 0.724 | 0.086 | -0.248 | 7015 |
| 727 | LY-294002              | 100 nM | PC3  | 0.724 | 0.116 | -0.218 | 4440 |
| 728 | atropine oxide         | 12 µM  | PC3  | 0.724 | 0.1   | -0.234 | 4476 |
| 506 | rosiglitazone          | 10 µM  | MCF7 | 0.723 | 0.094 | -0.24  | 1013 |
| 628 | meticrane              | 15 µM  | PC3  | 0.723 | 0.106 | -0.228 | 1792 |
| 672 | tetroquinone           | 21 µM  | MCF7 | 0.723 | 0.081 | -0.253 | 3338 |
| 720 | 2,6-dimethylpiperidine | 27 µM  | MCF7 | 0.722 | 0.116 | -0.218 | 4363 |
| 748 | neomycin               | 4 µM   | MCF7 | 0.722 | 0.102 | -0.232 | 7221 |
| 741 | thalidomide            | 15 µM  | MCF7 | 0.721 | 0.082 | -0.252 | 5990 |
| 660 | urapidil               | 9 µM   | HL60 | 0.721 | 0.056 | -0.277 | 3078 |
| 702 | citolone               | 25 µM  | PC3  | 0.721 | 0.141 | -0.192 | 4311 |
| 664 | methyl dopate          | 15 µM  | HL60 | 0.721 | 0.068 | -0.265 | 2940 |
| 730 | idazoxan               | 17 µM  | MCF7 | 0.721 | 0.108 | -0.225 | 5347 |
| 718 | piracetam              | 28 µM  | PC3  | 0.72  | 0.08  | -0.252 | 5043 |
| 664 | letrozole              | 14 µM  | HL60 | 0.719 | 0.07  | -0.263 | 2916 |
| 617 | antimycin A            | 7 µM   | PC3  | 0.719 | 0.088 | -0.245 | 2098 |
| 664 | pancuronium bromide    | 5 µM   | HL60 | 0.719 | 0.102 | -0.23  | 2909 |
| 744 | cyproterone            | 10 µM  | MCF7 | 0.719 | 0.101 | -0.231 | 6806 |
| 694 | benperidol             | 10 µM  | MCF7 | 0.719 | 0.086 | -0.246 | 4781 |
| 502 | bucladesine            | 2 µM   | MCF7 | 0.718 | 0.118 | -0.214 | 959  |
| 749 | oxprenolol             | 13 µM  | HL60 | 0.717 | 0.118 | -0.213 | 6145 |
| 706 | omeprazole             | 12 µM  | MCF7 | 0.717 | 0.088 | -0.243 | 4951 |
| 663 | picrotoxinin           | 14 µM  | MCF7 | 0.717 | 0.102 | -0.229 | 2816 |
| 720 | pramocaine             | 12 µM  | MCF7 | 0.716 | 0.107 | -0.224 | 4368 |
| 654 | ginkgolide A           | 10 µM  | MCF7 | 0.715 | 0.077 | -0.253 | 3260 |
| 664 | tracazolate            | 12 µM  | HL60 | 0.715 | 0.066 | -0.264 | 2919 |
| 758 | cefalexin              | 11 µM  | MCF7 | 0.715 | 0.11  | -0.22  | 5615 |
| 702 | eldeline               | 8 µM   | PC3  | 0.715 | 0.138 | -0.192 | 4306 |
| 694 | probenecid             | 14 µM  | MCF7 | 0.715 | 0.113 | -0.217 | 4771 |
| 706 | betahistine            | 17 µM  | MCF7 | 0.714 | 0.072 | -0.258 | 4956 |
| 720 | ciclaicillin           | 12 µM  | MCF7 | 0.714 | 0.093 | -0.237 | 4358 |
| 702 | solasodine             | 10 µM  | PC3  | 0.714 | 0.133 | -0.197 | 4305 |

|     |                      |        |      |       |       |        |      |
|-----|----------------------|--------|------|-------|-------|--------|------|
| 766 | talampicillin        | 8 µM   | MCF7 | 0.714 | 0.067 | -0.262 | 7014 |
| 752 | delsoline            | 9 µM   | MCF7 | 0.714 | 0.106 | -0.224 | 6075 |
| 654 | fusaric acid         | 22 µM  | MCF7 | 0.713 | 0.076 | -0.254 | 3245 |
| 762 | lansoprazole         | 11 µM  | PC3  | 0.713 | 0.095 | -0.234 | 7306 |
| 660 | lorglumide           | 8 µM   | HL60 | 0.713 | 0.093 | -0.236 | 3079 |
| 506 | chlorpromazine       | 1 µM   | MCF7 | 0.713 | 0.096 | -0.233 | 997  |
| 702 | metamizole sodium    | 12 µM  | PC3  | 0.713 | 0.143 | -0.186 | 4310 |
| 743 | piperidolate         | 11 µM  | MCF7 | 0.713 | 0.081 | -0.249 | 6772 |
| 766 | morantel             | 11 µM  | MCF7 | 0.713 | 0.091 | -0.239 | 7010 |
| 654 | carbarsone           | 15 µM  | MCF7 | 0.712 | 0.101 | -0.228 | 3250 |
| 707 | doxazosin            | 7 µM   | MCF7 | 0.711 | 0.1   | -0.228 | 4988 |
| 678 | Prestwick-1085       | 15 µM  | MCF7 | 0.711 | 0.129 | -0.2   | 3554 |
| 749 | Prestwick-1084       | 16 µM  | HL60 | 0.711 | 0.085 | -0.244 | 6125 |
| 690 | oxybuprocaine        | 12 µM  | MCF7 | 0.711 | 0.115 | -0.214 | 4115 |
| 694 | conessine            | 11 µM  | MCF7 | 0.71  | 0.13  | -0.198 | 4777 |
| 743 | propoxycaine         | 12 µM  | MCF7 | 0.71  | 0.092 | -0.236 | 6803 |
| 677 | etomidate            | 16 µM  | MCF7 | 0.71  | 0.096 | -0.232 | 3519 |
| 660 | N-acetyl-L-leucine   | 23 µM  | HL60 | 0.71  | 0.081 | -0.247 | 3085 |
| 629 | benzonatate          | 7 µM   | HL60 | 0.71  | 0.062 | -0.266 | 1843 |
| 672 | procyclidine         | 12 µM  | MCF7 | 0.709 | 0.088 | -0.24  | 3330 |
| 663 | glimepiride          | 8 µM   | MCF7 | 0.709 | 0.095 | -0.232 | 2809 |
| 664 | sitosterol           | 10 µM  | HL60 | 0.709 | 0.089 | -0.238 | 2912 |
| 718 | homatropine          | 11 µM  | PC3  | 0.708 | 0.091 | -0.236 | 5058 |
| 664 | etofenamate          | 11 µM  | HL60 | 0.708 | 0.075 | -0.252 | 2907 |
| 682 | famprofazone         | 11 µM  | PC3  | 0.707 | 0.109 | -0.218 | 3753 |
| 656 | selegiline           | 18 µM  | MCF7 | 0.707 | 0.094 | -0.233 | 2826 |
| 663 | xylazine             | 18 µM  | MCF7 | 0.706 | 0.076 | -0.25  | 2788 |
| 719 | sulfadiazine         | 16 µM  | PC3  | 0.706 | 0.087 | -0.239 | 5098 |
| 661 | ursodeoxycholic acid | 10 µM  | HL60 | 0.706 | 0.087 | -0.239 | 3105 |
| 504 | 5255229              | 13 µM  | MCF7 | 0.706 | 0.113 | -0.213 | 833  |
| 762 | meticrane            | 15 µM  | PC3  | 0.706 | 0.069 | -0.257 | 7282 |
| 751 | pempidine            | 13 µM  | MCF7 | 0.706 | 0.095 | -0.231 | 6027 |
| 702 | famprofazone         | 11 µM  | PC3  | 0.706 | 0.124 | -0.202 | 4309 |
| 685 | medrysone            | 12 µM  | MCF7 | 0.705 | 0.081 | -0.245 | 3603 |
| 513 | LY-294002            | 100 nM | MCF7 | 0.705 | 0.088 | -0.238 | 1054 |
| 661 | isradipine           | 11 µM  | HL60 | 0.705 | 0.052 | -0.274 | 3129 |
| 706 | protoveratrine A     | 5 µM   | MCF7 | 0.705 | 0.083 | -0.243 | 4963 |

|      |                             |       |      |       |       |        |      |
|------|-----------------------------|-------|------|-------|-------|--------|------|
| 1050 | BAS-012416453               | 38 µM | PC3  | 0.705 | 0.106 | -0.22  | 6876 |
| 672  | trimipramine                | 10 µM | MCF7 | 0.705 | 0.119 | -0.207 | 3342 |
| 691  | tobramycin                  | 9 µM  | MCF7 | 0.704 | 0.121 | -0.205 | 4162 |
| 663  | diflorasone                 | 8 µM  | MCF7 | 0.704 | 0.115 | -0.211 | 2798 |
| 708  | Prestwick-860               | 35 µM | MCF7 | 0.704 | 0.146 | -0.179 | 5679 |
| 656  | terconazole                 | 8 µM  | MCF7 | 0.704 | 0.095 | -0.23  | 2844 |
| 731  | etacrynic acid              | 13 µM | PC3  | 0.704 | 0.082 | -0.243 | 5742 |
| 720  | nialamide                   | 13 µM | MCF7 | 0.703 | 0.118 | -0.207 | 4347 |
| 753  | verapamil                   | 8 µM  | PC3  | 0.703 | 0.103 | -0.221 | 6287 |
| 751  | karakoline                  | 11 µM | MCF7 | 0.702 | 0.112 | -0.213 | 6059 |
| 663  | harman                      | 18 µM | MCF7 | 0.702 | 0.102 | -0.222 | 2806 |
| 751  | heliotrine                  | 13 µM | MCF7 | 0.702 | 0.122 | -0.203 | 6035 |
| 700  | hydralazine                 | 20 µM | MCF7 | 0.702 | 0.106 | -0.218 | 4746 |
| 730  | adenosine phosphate         | 11 µM | MCF7 | 0.702 | 0.084 | -0.24  | 5359 |
| 691  | cefadroxil                  | 11 µM | MCF7 | 0.701 | 0.145 | -0.179 | 4161 |
| 762  | lymecycline                 | 7 µM  | PC3  | 0.701 | 0.093 | -0.231 | 7291 |
| 706  | carisoprodol                | 15 µM | MCF7 | 0.701 | 0.092 | -0.232 | 4955 |
| 630  | N6-methyladenosine          | 14 µM | HL60 | 0.701 | 0.108 | -0.216 | 1271 |
| 738  | gliclazide                  | 12 µM | MCF7 | 0.701 | 0.133 | -0.191 | 5514 |
| 665  | roxarsone                   | 15 µM | HL60 | 0.701 | 0.067 | -0.256 | 2950 |
| 749  | mesalazine                  | 26 µM | HL60 | 0.701 | 0.067 | -0.257 | 6162 |
| 664  | naftopidil                  | 9 µM  | HL60 | 0.7   | 0.055 | -0.269 | 2911 |
| 617  | hyosecyamine                | 14 µM | PC3  | 0.699 | 0.089 | -0.234 | 2108 |
| 708  | androsterone                | 14 µM | MCF7 | 0.699 | 0.128 | -0.195 | 5696 |
| 1028 | STOCK1N-35215               | 10 µM | MCF7 | 0.699 | 0.103 | -0.22  | 6422 |
| 633  | ciprofloxacin               | 11 µM | MCF7 | 0.699 | 0.099 | -0.224 | 1522 |
| 701  | medrysone                   | 12 µM | PC3  | 0.699 | 0.115 | -0.207 | 4266 |
| 730  | chlortetracycline           | 8 µM  | MCF7 | 0.698 | 0.075 | -0.248 | 5360 |
| 694  | galantamine                 | 11 µM | MCF7 | 0.698 | 0.084 | -0.238 | 4772 |
| 616  | acetylsalicylsalicylic acid | 13 µM | PC3  | 0.698 | 0.099 | -0.223 | 2061 |
| 720  | oxaprozin                   | 14 µM | MCF7 | 0.698 | 0.082 | -0.24  | 4352 |
| 757  | prochlorperazine            | 10 µM | MCF7 | 0.697 | 0.075 | -0.247 | 5575 |
| 700  | phenformin                  | 17 µM | MCF7 | 0.697 | 0.147 | -0.175 | 4747 |
| 1016 | 3-nitropropionic acid       | 10 µM | MCF7 | 0.697 | 0.14  | -0.182 | 6367 |
| 730  | rolipram                    | 15 µM | MCF7 | 0.697 | 0.068 | -0.254 | 5330 |
| 663  | protoveratrine A            | 5 µM  | MCF7 | 0.697 | 0.097 | -0.224 | 2800 |
| 663  | retrorsine                  | 11 µM | MCF7 | 0.697 | 0.07  | -0.252 | 2784 |

|     |                    |       |      |       |       |        |      |
|-----|--------------------|-------|------|-------|-------|--------|------|
| 750 | rosiglitazone      | 10 µM | HL60 | 0.696 | 0.097 | -0.224 | 6192 |
| 707 | hydroxyzine        | 9 µM  | MCF7 | 0.696 | 0.084 | -0.237 | 5006 |
| 664 | apramycin          | 7 µM  | HL60 | 0.696 | 0.062 | -0.259 | 2914 |
| 665 | naftifine          | 12 µM | HL60 | 0.696 | 0.094 | -0.227 | 2974 |
| 753 | aminophylline      | 10 µM | PC3  | 0.696 | 0.089 | -0.233 | 6295 |
| 630 | cefalexin          | 11 µM | HL60 | 0.695 | 0.084 | -0.238 | 1273 |
| 761 | chloroquine        | 8 µM  | PC3  | 0.695 | 0.105 | -0.216 | 7251 |
| 629 | epirizole          | 17 µM | HL60 | 0.695 | 0.077 | -0.244 | 1845 |
| 706 | tracazolate        | 12 µM | MCF7 | 0.695 | 0.09  | -0.231 | 4964 |
| 672 | trichlormethiazide | 11 µM | MCF7 | 0.694 | 0.149 | -0.172 | 3337 |
| 751 | Prestwick-685      | 11 µM | MCF7 | 0.693 | 0.1   | -0.22  | 6043 |
| 708 | droperidol         | 11 µM | MCF7 | 0.692 | 0.094 | -0.225 | 5690 |
| 651 | mevalolactone      | 31 µM | HL60 | 0.691 | 0.061 | -0.258 | 2718 |
| 663 | seneciophylline    | 12 µM | MCF7 | 0.691 | 0.087 | -0.232 | 2797 |
| 748 | harmine            | 16 µM | MCF7 | 0.691 | 0.074 | -0.245 | 7209 |
| 695 | salsolinol         | 15 µM | MCF7 | 0.691 | 0.064 | -0.255 | 4816 |
| 673 | Prestwick-860      | 35 µM | MCF7 | 0.69  | 0.123 | -0.195 | 3378 |
| 700 | lomefloxacin       | 10 µM | MCF7 | 0.69  | 0.133 | -0.185 | 4745 |
| 642 | griseofulvin       | 11 µM | MCF7 | 0.69  | 0.111 | -0.208 | 2293 |
| 683 | santonin           | 16 µM | PC3  | 0.69  | 0.11  | -0.209 | 3795 |
| 663 | quinisocaine       | 13 µM | MCF7 | 0.69  | 0.075 | -0.244 | 2807 |
| 704 | sulpiride          | 12 µM | PC3  | 0.69  | 0.077 | -0.241 | 4566 |
| 642 | tiapride           | 11 µM | MCF7 | 0.689 | 0.112 | -0.206 | 2292 |
| 672 | liothyronine       | 6 µM  | MCF7 | 0.689 | 0.082 | -0.236 | 3324 |
| 635 | omeprazole         | 12 µM | HL60 | 0.689 | 0.069 | -0.249 | 2467 |
| 751 | metamizole sodium  | 12 µM | MCF7 | 0.689 | 0.078 | -0.24  | 6030 |
| 686 | ethisterone        | 13 µM | MCF7 | 0.688 | 0.089 | -0.229 | 3864 |
| 661 | depropine          | 8 µM  | HL60 | 0.688 | 0.083 | -0.235 | 3144 |
| 756 | chrysin            | 16 µM | MCF7 | 0.688 | 0.09  | -0.228 | 6485 |
| 750 | valproic acid      | 1 mM  | HL60 | 0.688 | 0.091 | -0.227 | 6168 |
| 701 | levonorgestrel     | 13 µM | PC3  | 0.687 | 0.091 | -0.226 | 4269 |
| 708 | tyloxapol          | 4 µM  | MCF7 | 0.687 | 0.101 | -0.216 | 5672 |
| 677 | rimexolone         | 11 µM | MCF7 | 0.687 | 0.127 | -0.19  | 3516 |
| 657 | triflusal          | 16 µM | MCF7 | 0.686 | 0.078 | -0.239 | 2867 |
| 720 | santonin           | 16 µM | MCF7 | 0.686 | 0.082 | -0.235 | 4353 |
| 730 | caffeic acid       | 22 µM | MCF7 | 0.686 | 0.093 | -0.224 | 5352 |
| 642 | sulfamethoxazole   | 16 µM | MCF7 | 0.686 | 0.091 | -0.226 | 2296 |

|     |                       |       |      |       |       |        |      |
|-----|-----------------------|-------|------|-------|-------|--------|------|
| 711 | sulfachlorpyridazine  | 14 µM | MCF7 | 0.686 | 0.111 | -0.205 | 3944 |
| 729 | hydrocortisone        | 11 µM | MCF7 | 0.685 | 0.078 | -0.239 | 5284 |
| 690 | ethambutol            | 14 µM | MCF7 | 0.684 | 0.1   | -0.216 | 4120 |
| 702 | benfotiamine          | 9 µM  | PC3  | 0.683 | 0.105 | -0.211 | 4312 |
| 737 | ifenprodil            | 8 µM  | MCF7 | 0.683 | 0.075 | -0.241 | 5463 |
| 678 | ciprofibrate          | 14 µM | MCF7 | 0.683 | 0.109 | -0.206 | 3561 |
| 744 | diperodon             | 9 µM  | MCF7 | 0.683 | 0.095 | -0.221 | 6836 |
| 664 | fluvoxamine           | 9 µM  | HL60 | 0.682 | 0.049 | -0.266 | 2913 |
| 678 | Prestwick-1084        | 16 µM | MCF7 | 0.682 | 0.114 | -0.201 | 3546 |
| 695 | primaquine            | 9 µM  | MCF7 | 0.682 | 0.091 | -0.224 | 4845 |
| 656 | tenoxicam             | 12 µM | MCF7 | 0.682 | 0.1   | -0.215 | 2860 |
| 752 | trioxysalen           | 18 µM | MCF7 | 0.681 | 0.099 | -0.216 | 6078 |
| 749 | meropenem             | 10 µM | HL60 | 0.681 | 0.083 | -0.232 | 6141 |
| 664 | decamethonium bromide | 10 µM | HL60 | 0.681 | 0.057 | -0.257 | 2933 |
| 758 | guanfacine            | 14 µM | MCF7 | 0.681 | 0.1   | -0.214 | 5621 |
| 656 | propylthiouracil      | 23 µM | MCF7 | 0.68  | 0.103 | -0.212 | 2837 |
| 637 | flufenamic acid       | 14 µM | MCF7 | 0.68  | 0.134 | -0.181 | 2267 |
| 656 | tobramycin            | 9 µM  | MCF7 | 0.68  | 0.096 | -0.218 | 2841 |
| 704 | captopril             | 17 µM | PC3  | 0.68  | 0.084 | -0.23  | 4585 |
| 618 | tolbutamide           | 15 µM | HL60 | 0.679 | 0.076 | -0.237 | 2359 |
| 746 | methacholine chloride | 20 µM | MCF7 | 0.679 | 0.086 | -0.227 | 6248 |
| 750 | fulvestrant           | 1 µM  | HL60 | 0.679 | 0.071 | -0.243 | 6165 |
| 664 | fursultiamine         | 9 µM  | HL60 | 0.678 | 0.05  | -0.264 | 2929 |
| 662 | tetrahydroalstonine   | 11 µM | MCF7 | 0.678 | 0.099 | -0.214 | 2748 |
| 502 | blebbistatin          | 17 µM | MCF7 | 0.678 | 0.118 | -0.195 | 954  |
| 626 | valproic acid         | 50 µM | MCF7 | 0.678 | 0.087 | -0.226 | 1647 |
| 730 | zaprinast             | 15 µM | MCF7 | 0.678 | 0.096 | -0.217 | 5349 |
| 706 | palmatine             | 10 µM | MCF7 | 0.678 | 0.075 | -0.238 | 4957 |
| 751 | halcinonide           | 9 µM  | MCF7 | 0.678 | 0.112 | -0.201 | 6040 |
| 688 | azacitidine           | 16 µM | PC3  | 0.678 | 0.077 | -0.236 | 4010 |
| 756 | atropine methonitrate | 11 µM | MCF7 | 0.678 | 0.079 | -0.234 | 6495 |
| 728 | aminophenazone        | 17 µM | PC3  | 0.678 | 0.092 | -0.221 | 4481 |
| 672 | reserpine             | 7 µM  | MCF7 | 0.678 | 0.07  | -0.243 | 3341 |
| 657 | bromperidol           | 10 µM | MCF7 | 0.678 | 0.069 | -0.244 | 2872 |
| 672 | tolmetin              | 13 µM | MCF7 | 0.677 | 0.083 | -0.23  | 3347 |
| 749 | cycloserine           | 39 µM | HL60 | 0.677 | 0.088 | -0.224 | 6139 |
| 699 | 0175029-0000          | 1 µM  | MCF7 | 0.677 | 0.093 | -0.22  | 4716 |

|     |                          |        |      |       |       |        |      |
|-----|--------------------------|--------|------|-------|-------|--------|------|
| 685 | PNU-0230031              | 10 µM  | MCF7 | 0.677 | 0.08  | -0.233 | 3629 |
| 617 | thalidomide              | 15 µM  | PC3  | 0.677 | 0.084 | -0.229 | 2095 |
| 664 | oxamniquine              | 14 µM  | HL60 | 0.676 | 0.062 | -0.251 | 2924 |
| 730 | betamethasone            | 10 µM  | MCF7 | 0.676 | 0.09  | -0.223 | 5328 |
| 707 | edrophonium chloride     | 20 µM  | MCF7 | 0.676 | 0.101 | -0.212 | 5001 |
| 690 | Prestwick-864            | 35 µM  | MCF7 | 0.676 | 0.105 | -0.207 | 4113 |
| 744 | dacarbazine              | 22 µM  | MCF7 | 0.676 | 0.1   | -0.212 | 6816 |
| 627 | meticrane                | 15 µM  | MCF7 | 0.675 | 0.109 | -0.203 | 1671 |
| 709 | benzthiazide             | 9 µM   | PC3  | 0.675 | 0.141 | -0.171 | 6607 |
| 707 | methapyrilene            | 13 µM  | MCF7 | 0.675 | 0.108 | -0.204 | 4990 |
| 658 | roxithromycin            | 5 µM   | HL60 | 0.675 | 0.072 | -0.24  | 2992 |
| 690 | ginkgolide A             | 10 µM  | MCF7 | 0.674 | 0.079 | -0.233 | 4121 |
| 765 | haloperidol              | 10 µM  | MCF7 | 0.674 | 0.09  | -0.221 | 6963 |
| 701 | fenoprofen               | 7 µM   | PC3  | 0.674 | 0.097 | -0.214 | 4274 |
| 682 | spiramycin               | 5 µM   | PC3  | 0.674 | 0.083 | -0.228 | 3762 |
| 628 | acetoexamide             | 12 µM  | PC3  | 0.673 | 0.105 | -0.206 | 1829 |
| 700 | bromopride               | 12 µM  | MCF7 | 0.673 | 0.087 | -0.224 | 4741 |
| 757 | valproic acid            | 200 µM | MCF7 | 0.673 | 0.072 | -0.239 | 5574 |
| 654 | calcium pantothenate     | 8 µM   | MCF7 | 0.673 | 0.152 | -0.159 | 3248 |
| 758 | flurbiprofen             | 16 µM  | MCF7 | 0.673 | 0.118 | -0.192 | 5634 |
| 749 | piperidolate             | 11 µM  | HL60 | 0.673 | 0.087 | -0.224 | 6129 |
| 706 | hexamethonium bromide    | 10 µM  | MCF7 | 0.672 | 0.126 | -0.184 | 4965 |
| 665 | talampicillin            | 8 µM   | HL60 | 0.672 | 0.044 | -0.267 | 2954 |
| 678 | saquinavir               | 5 µM   | MCF7 | 0.672 | 0.12  | -0.191 | 3549 |
| 678 | cyclopentolate           | 12 µM  | MCF7 | 0.672 | 0.114 | -0.196 | 3555 |
| 617 | scopolamine N-oxide      | 10 µM  | PC3  | 0.672 | 0.084 | -0.227 | 2099 |
| 705 | tiabendazole             | 20 µM  | MCF7 | 0.672 | 0.093 | -0.218 | 4402 |
| 772 | etomidate                | 16 µM  | MCF7 | 0.671 | 0.124 | -0.187 | 7460 |
| 694 | calcium pantothenate     | 8 µM   | MCF7 | 0.671 | 0.1   | -0.21  | 4775 |
| 657 | hydrastine hydrochloride | 10 µM  | MCF7 | 0.671 | 0.099 | -0.211 | 2889 |
| 711 | fluocinonide             | 8 µM   | MCF7 | 0.67  | 0.084 | -0.226 | 3933 |
| 694 | spectinomycin            | 10 µM  | MCF7 | 0.67  | 0.096 | -0.214 | 4773 |
| 706 | lysergol                 | 16 µM  | MCF7 | 0.67  | 0.072 | -0.237 | 4966 |
| 673 | luteolin                 | 14 µM  | MCF7 | 0.67  | 0.064 | -0.245 | 3379 |
| 705 | paromomycin              | 6 µM   | MCF7 | 0.669 | 0.094 | -0.215 | 4420 |
| 753 | dequalinium chloride     | 8 µM   | PC3  | 0.669 | 0.062 | -0.248 | 6296 |
| 654 | apigenin                 | 15 µM  | MCF7 | 0.669 | 0.076 | -0.233 | 3257 |

|     |                       |        |      |       |       |        |      |
|-----|-----------------------|--------|------|-------|-------|--------|------|
| 632 | ethambutol            | 14 µM  | MCF7 | 0.669 | 0.121 | -0.188 | 1481 |
| 619 | bufexamac             | 18 µM  | HL60 | 0.669 | 0.112 | -0.197 | 2382 |
| 656 | mycophenolic acid     | 12 µM  | MCF7 | 0.668 | 0.061 | -0.248 | 2857 |
| 628 | sulfaphenazole        | 13 µM  | PC3  | 0.668 | 0.09  | -0.219 | 1794 |
| 695 | (+/-)-catechin        | 14 µM  | MCF7 | 0.667 | 0.09  | -0.218 | 4837 |
| 618 | tropicamide           | 14 µM  | HL60 | 0.667 | 0.06  | -0.248 | 2347 |
| 751 | pramocaine            | 12 µM  | MCF7 | 0.667 | 0.098 | -0.21  | 6054 |
| 683 | Prestwick-1080        | 15 µM  | PC3  | 0.667 | 0.13  | -0.178 | 3796 |
| 708 | dehydrocholic acid    | 10 µM  | MCF7 | 0.666 | 0.13  | -0.178 | 5681 |
| 663 | gramine               | 23 µM  | MCF7 | 0.666 | 0.108 | -0.199 | 2799 |
| 648 | estropipate           | 9 µM   | HL60 | 0.666 | 0.065 | -0.242 | 2506 |
| 662 | harmine               | 16 µM  | MCF7 | 0.665 | 0.069 | -0.239 | 2750 |
| 701 | demeclocycline        | 8 µM   | PC3  | 0.665 | 0.115 | -0.192 | 4267 |
| 632 | hexamethonium bromide | 10 µM  | MCF7 | 0.665 | 0.109 | -0.199 | 1482 |
| 682 | solasodine            | 10 µM  | PC3  | 0.665 | 0.103 | -0.204 | 3749 |
| 755 | (-)-atenolol          | 15 µM  | MCF7 | 0.665 | 0.109 | -0.198 | 6444 |
| 642 | trimethoprim          | 14 µM  | MCF7 | 0.665 | 0.095 | -0.212 | 2307 |
| 699 | clemizole             | 11 µM  | MCF7 | 0.665 | 0.121 | -0.186 | 4695 |
| 707 | estrone               | 15 µM  | MCF7 | 0.664 | 0.076 | -0.231 | 4993 |
| 655 | bisacodyl             | 11 µM  | MCF7 | 0.664 | 0.146 | -0.161 | 3297 |
| 758 | pentoxyverine         | 8 µM   | MCF7 | 0.663 | 0.089 | -0.218 | 5610 |
| 664 | etilefrine            | 18 µM  | HL60 | 0.663 | 0.081 | -0.226 | 2930 |
| 657 | thiocolchicoside      | 7 µM   | MCF7 | 0.663 | 0.099 | -0.208 | 2875 |
| 752 | Prestwick-689         | 10 µM  | MCF7 | 0.662 | 0.086 | -0.22  | 6076 |
| 642 | clemizole             | 11 µM  | MCF7 | 0.662 | 0.098 | -0.208 | 2301 |
| 661 | scopoletin            | 21 µM  | HL60 | 0.662 | 0.066 | -0.24  | 3131 |
| 701 | heliotrine            | 13 µM  | PC3  | 0.661 | 0.1   | -0.206 | 4277 |
| 677 | netilmicin            | 3 µM   | MCF7 | 0.661 | 0.09  | -0.216 | 3524 |
| 662 | riboflavin            | 11 µM  | MCF7 | 0.66  | 0.115 | -0.19  | 2760 |
| 513 | alvespimycin          | 100 nM | MCF7 | 0.66  | 0.052 | -0.253 | 1051 |
| 743 | monocrotaline         | 12 µM  | MCF7 | 0.66  | 0.1   | -0.205 | 6771 |
| 705 | cyanocobalamin        | 3 µM   | MCF7 | 0.659 | 0.092 | -0.213 | 4395 |
| 687 | beta-escin            | 3 µM   | MCF7 | 0.659 | 0.096 | -0.209 | 3890 |
| 618 | metoclopramide        | 12 µM  | HL60 | 0.659 | 0.085 | -0.219 | 2353 |
| 691 | sitosterol            | 10 µM  | MCF7 | 0.658 | 0.095 | -0.209 | 4154 |
| 682 | eldeline              | 8 µM   | PC3  | 0.658 | 0.092 | -0.212 | 3750 |
| 756 | proxiphylline         | 17 µM  | MCF7 | 0.658 | 0.065 | -0.239 | 6494 |

|      |                  |        |      |       |       |        |      |
|------|------------------|--------|------|-------|-------|--------|------|
| 634  | colecalfiferol   | 10 µM  | HL60 | 0.658 | 0.066 | -0.238 | 2436 |
| 644  | picrotoxinin     | 14 µM  | HL60 | 0.657 | 0.056 | -0.247 | 2161 |
| 615  | etofylline       | 18 µM  | HL60 | 0.657 | 0.091 | -0.213 | 1409 |
| 753  | chlorpropamide   | 14 µM  | PC3  | 0.657 | 0.09  | -0.213 | 6291 |
| 618  | flutamide        | 14 µM  | HL60 | 0.657 | 0.1   | -0.204 | 2358 |
| 732  | cinoxacin        | 15 µM  | PC3  | 0.657 | 0.18  | -0.123 | 5783 |
| 719  | thiocolchicoside | 7 µM   | PC3  | 0.657 | 0.078 | -0.226 | 5095 |
| 703  | guaifenesin      | 20 µM  | PC3  | 0.657 | 0.105 | -0.199 | 4549 |
| 714  | naftidrofuryl    | 8 µM   | PC3  | 0.657 | 0.082 | -0.221 | 6687 |
| 752  | skimmianine      | 15 µM  | MCF7 | 0.656 | 0.127 | -0.176 | 6066 |
| 683  | levcycloserine   | 39 µM  | PC3  | 0.656 | 0.105 | -0.198 | 3789 |
| 746  | DL-thiorphan     | 16 µM  | MCF7 | 0.656 | 0.107 | -0.196 | 6249 |
| 748  | mepyramine       | 10 µM  | MCF7 | 0.656 | 0.084 | -0.219 | 7223 |
| 718  | pivampicillin    | 9 µM   | PC3  | 0.656 | 0.085 | -0.217 | 5046 |
| 757  | chlorpromazine   | 1 µM   | MCF7 | 0.655 | 0.082 | -0.221 | 5577 |
| 631  | brompheniramine  | 9 µM   | HL60 | 0.655 | 0.142 | -0.161 | 1335 |
| 689  | cinchocaine      | 12 µM  | PC3  | 0.655 | 0.061 | -0.241 | 4068 |
| 654  | lumicolchicine   | 10 µM  | MCF7 | 0.655 | 0.1   | -0.203 | 3254 |
| 694  | roxithromycin    | 5 µM   | MCF7 | 0.654 | 0.083 | -0.219 | 4778 |
| 756  | Prestwick-972    | 23 µM  | MCF7 | 0.654 | 0.101 | -0.201 | 6511 |
| 678  | meprylcaine      | 15 µM  | MCF7 | 0.654 | 0.092 | -0.21  | 3544 |
| 756  | flucloxacillin   | 8 µM   | MCF7 | 0.654 | 0.059 | -0.243 | 6507 |
| 729  | dexibuprofen     | 19 µM  | MCF7 | 0.653 | 0.07  | -0.231 | 5311 |
| 657  | scoulerine       | 12 µM  | MCF7 | 0.653 | 0.084 | -0.218 | 2891 |
| 720  | Prestwick-1080   | 15 µM  | MCF7 | 0.653 | 0.09  | -0.211 | 4354 |
| 1026 | erastin          | 20 µM  | MCF7 | 0.653 | 0.105 | -0.197 | 6412 |
| 637  | piroxicam        | 12 µM  | MCF7 | 0.653 | 0.126 | -0.176 | 2252 |
| 24   | staurosporine    | 1 µM   | MCF7 | 0.653 | 0.095 | -0.207 | 312  |
| 772  | betulin          | 9 µM   | MCF7 | 0.653 | 0.092 | -0.209 | 7454 |
| 689  | ticlopidine      | 13 µM  | PC3  | 0.652 | 0.068 | -0.233 | 4074 |
| 647  | clorgiline       | 13 µM  | MCF7 | 0.652 | 0.067 | -0.234 | 3219 |
| 635  | 6-azathymine     | 31 µM  | HL60 | 0.652 | 0.052 | -0.249 | 2466 |
| 603  | LY-294002        | 100 nM | PC3  | 0.652 | 0.125 | -0.176 | 1216 |
| 1020 | 0225151-0000     | 10 µM  | MCF7 | 0.652 | 0.091 | -0.21  | 6384 |
| 731  | dizocilpine      | 12 µM  | PC3  | 0.652 | 0.104 | -0.197 | 5746 |
| 700  | ketoprofen       | 16 µM  | MCF7 | 0.651 | 0.097 | -0.204 | 4751 |
| 718  | lobelanidine     | 11 µM  | PC3  | 0.651 | 0.134 | -0.167 | 5080 |



|     |                    |       |      |       |       |        |      |
|-----|--------------------|-------|------|-------|-------|--------|------|
| 622 | clomipramine       | 11 µM | HL60 | 0.651 | 0.087 | -0.214 | 1566 |
| 707 | bezafibrate        | 11 µM | MCF7 | 0.651 | 0.072 | -0.229 | 4999 |
| 749 | repaglinide        | 9 µM  | HL60 | 0.65  | 0.058 | -0.242 | 6135 |
| 706 | benzthiazide       | 9 µM  | MCF7 | 0.65  | 0.121 | -0.179 | 4952 |
| 705 | cefixime           | 9 µM  | MCF7 | 0.65  | 0.07  | -0.23  | 4390 |
| 749 | ronidazole         | 20 µM | HL60 | 0.65  | 0.109 | -0.191 | 6134 |
| 634 | dicloxacillin      | 8 µM  | HL60 | 0.649 | 0.073 | -0.227 | 2445 |
| 718 | adrenosterone      | 13 µM | PC3  | 0.649 | 0.106 | -0.194 | 5045 |
| 732 | skimmianine        | 15 µM | PC3  | 0.649 | 0.112 | -0.188 | 5766 |
| 747 | tomatidine         | 10 µM | MCF7 | 0.648 | 0.08  | -0.22  | 7166 |
| 694 | sulfathiazole      | 16 µM | MCF7 | 0.648 | 0.104 | -0.195 | 4769 |
| 758 | lorglumide         | 8 µM  | MCF7 | 0.648 | 0.078 | -0.222 | 5619 |
| 616 | nomifensine        | 11 µM | PC3  | 0.648 | 0.109 | -0.19  | 2062 |
| 642 | mephenesin         | 22 µM | MCF7 | 0.648 | 0.082 | -0.217 | 2304 |
| 673 | fluvastatin        | 9 µM  | MCF7 | 0.648 | 0.101 | -0.198 | 3370 |
| 676 | metacycline        | 8 µM  | MCF7 | 0.647 | 0.084 | -0.215 | 7321 |
| 741 | metrifonate        | 16 µM | MCF7 | 0.647 | 0.12  | -0.179 | 5989 |
| 713 | phenoxybenzamine   | 12 µM | PC3  | 0.647 | 0.047 | -0.252 | 4652 |
| 730 | rolitetracycline   | 8 µM  | MCF7 | 0.647 | 0.076 | -0.223 | 5331 |
| 765 | fulvestrant        | 1 µM  | MCF7 | 0.647 | 0.06  | -0.239 | 6965 |
| 672 | chloropyramine     | 12 µM | MCF7 | 0.647 | 0.095 | -0.204 | 3350 |
| 749 | ticarcillin        | 9 µM  | HL60 | 0.647 | 0.08  | -0.219 | 6146 |
| 690 | azacitidine        | 16 µM | MCF7 | 0.647 | 0.109 | -0.19  | 4128 |
| 743 | alprenolol         | 14 µM | MCF7 | 0.647 | 0.092 | -0.207 | 6789 |
| 635 | norcyclobenzaprine | 15 µM | HL60 | 0.647 | 0.045 | -0.254 | 2469 |
| 663 | vitexin            | 9 µM  | MCF7 | 0.646 | 0.076 | -0.222 | 2810 |
| 738 | chrysin            | 16 µM | MCF7 | 0.646 | 0.085 | -0.213 | 5505 |
| 753 | metolazone         | 11 µM | PC3  | 0.646 | 0.079 | -0.22  | 6292 |
| 748 | milrinone          | 19 µM | MCF7 | 0.646 | 0.068 | -0.231 | 7210 |
| 747 | pyridoxine         | 19 µM | MCF7 | 0.645 | 0.062 | -0.236 | 7171 |
| 618 | phentolamine       | 13 µM | HL60 | 0.644 | 0.058 | -0.24  | 2362 |
| 758 | clozapine          | 12 µM | MCF7 | 0.644 | 0.119 | -0.179 | 5630 |
| 772 | Prestwick-559      | 8 µM  | MCF7 | 0.644 | 0.062 | -0.236 | 7462 |
| 640 | triflusal          | 16 µM | HL60 | 0.644 | 0.096 | -0.202 | 1717 |
| 672 | roxithromycin      | 5 µM  | MCF7 | 0.644 | 0.107 | -0.191 | 3331 |
| 708 | procainamide       | 15 µM | MCF7 | 0.644 | 0.092 | -0.205 | 5663 |
| 766 | enalapril          | 8 µM  | MCF7 | 0.644 | 0.075 | -0.222 | 7026 |

|      |                       |             |      |       |       |        |      |
|------|-----------------------|-------------|------|-------|-------|--------|------|
| 633  | metanephrine          | 17 $\mu$ M  | MCF7 | 0.643 | 0.098 | -0.199 | 1515 |
| 700  | metoclopramide        | 12 $\mu$ M  | MCF7 | 0.643 | 0.111 | -0.186 | 4750 |
| 750  | sirolimus             | 100 nM      | HL60 | 0.643 | 0.09  | -0.207 | 6201 |
| 709  | apramycin             | 7 $\mu$ M   | PC3  | 0.643 | 0.103 | -0.194 | 6614 |
| 1074 | pioglitazone          | 10 $\mu$ M  | MCF7 | 0.642 | 0.094 | -0.203 | 7083 |
| 730  | midecamycin           | 5 $\mu$ M   | MCF7 | 0.642 | 0.084 | -0.213 | 5345 |
| 764  | ronidazole            | 20 $\mu$ M  | PC3  | 0.642 | 0.078 | -0.218 | 7131 |
| 718  | imidurea              | 10 $\mu$ M  | PC3  | 0.641 | 0.107 | -0.189 | 5062 |
| 656  | sisomicin             | 3 $\mu$ M   | MCF7 | 0.641 | 0.11  | -0.186 | 2853 |
| 718  | diethylcarbamazine    | 10 $\mu$ M  | PC3  | 0.641 | 0.105 | -0.191 | 5066 |
| 757  | valproic acid         | 1 mM        | MCF7 | 0.641 | 0.098 | -0.198 | 5569 |
| 657  | piracetam             | 28 $\mu$ M  | MCF7 | 0.641 | 0.09  | -0.206 | 2861 |
| 678  | repaglinide           | 9 $\mu$ M   | MCF7 | 0.641 | 0.107 | -0.189 | 3558 |
| 662  | papaverine            | 11 $\mu$ M  | MCF7 | 0.64  | 0.075 | -0.221 | 2747 |
| 705  | apigenin              | 15 $\mu$ M  | MCF7 | 0.64  | 0.084 | -0.212 | 4401 |
| 653  | thioguanosine         | 13 $\mu$ M  | MCF7 | 0.64  | 0.084 | -0.212 | 2619 |
| 695  | succinylsulfathiazole | 11 $\mu$ M  | MCF7 | 0.64  | 0.095 | -0.201 | 4847 |
| 725  | valproic acid         | 200 $\mu$ M | MCF7 | 0.64  | 0.079 | -0.216 | 5211 |
| 748  | delsoline             | 9 $\mu$ M   | MCF7 | 0.64  | 0.086 | -0.209 | 7212 |
| 657  | cyclizine             | 13 $\mu$ M  | MCF7 | 0.639 | 0.102 | -0.193 | 2880 |
| 1022 | C-75                  | 10 $\mu$ M  | MCF7 | 0.639 | 0.132 | -0.164 | 6394 |
| 744  | epivincamine          | 11 $\mu$ M  | MCF7 | 0.639 | 0.083 | -0.212 | 6838 |
| 730  | bupirone              | 9 $\mu$ M   | MCF7 | 0.639 | 0.106 | -0.189 | 5343 |
| 705  | N-acetylmuramic acid  | 14 $\mu$ M  | MCF7 | 0.639 | 0.103 | -0.192 | 4406 |
| 707  | sulconazole           | 9 $\mu$ M   | MCF7 | 0.638 | 0.057 | -0.238 | 4998 |
| 765  | sirolimus             | 100 nM      | MCF7 | 0.638 | 0.058 | -0.237 | 6967 |
| 670  | fenoprofen            | 7 $\mu$ M   | MCF7 | 0.638 | 0.081 | -0.214 | 3412 |
| 748  | noscipine             | 10 $\mu$ M  | MCF7 | 0.638 | 0.074 | -0.22  | 7204 |
| 764  | Prestwick-1084        | 16 $\mu$ M  | PC3  | 0.638 | 0.084 | -0.211 | 7125 |
| 750  | valproic acid         | 200 $\mu$ M | HL60 | 0.637 | 0.068 | -0.226 | 6173 |
| 708  | ketoconazole          | 8 $\mu$ M   | MCF7 | 0.637 | 0.078 | -0.217 | 5685 |
| 627  | sulfaphenazole        | 13 $\mu$ M  | MCF7 | 0.637 | 0.127 | -0.167 | 1673 |
| 671  | isopropamide iodide   | 8 $\mu$ M   | MCF7 | 0.637 | 0.084 | -0.21  | 3461 |
| 648  | napelline             | 11 $\mu$ M  | HL60 | 0.636 | 0.057 | -0.237 | 2522 |
| 772  | cortisone             | 11 $\mu$ M  | MCF7 | 0.636 | 0.068 | -0.226 | 7458 |
| 672  | simvastatin           | 10 $\mu$ M  | MCF7 | 0.636 | 0.065 | -0.228 | 3340 |
| 1052 | SB-202190             | 1 $\mu$ M   | PC3  | 0.636 | 0.12  | -0.174 | 6882 |

|      |                         |        |      |       |       |        |      |
|------|-------------------------|--------|------|-------|-------|--------|------|
| 714  | meglumine               | 20 µM  | PC3  | 0.636 | 0.13  | -0.164 | 6685 |
| 733  | natamycin               | 6 µM   | PC3  | 0.636 | 0.11  | -0.184 | 5809 |
| 1080 | BCB000040               | 10 µM  | MCF7 | 0.636 | 0.16  | -0.133 | 7488 |
| 701  | Prestwick-674           | 14 µM  | PC3  | 0.636 | 0.122 | -0.172 | 4276 |
| 665  | etomidate               | 16 µM  | HL60 | 0.635 | 0.056 | -0.238 | 2958 |
| 680  | sulfamethoxazole        | 16 µM  | PC3  | 0.635 | 0.078 | -0.215 | 3667 |
| 633  | dipyridamole            | 8 µM   | MCF7 | 0.635 | 0.061 | -0.232 | 1517 |
| 726  | pentetic acid           | 10 µM  | MCF7 | 0.635 | 0.094 | -0.199 | 5264 |
| 698  | nalidixic acid          | 15 µM  | PC3  | 0.634 | 0.086 | -0.207 | 7367 |
| 648  | altizide                | 10 µM  | HL60 | 0.634 | 0.06  | -0.233 | 2527 |
| 1048 | STOCK1N-28457           | 20 µM  | PC3  | 0.633 | 0.114 | -0.178 | 6864 |
| 718  | Prestwick-920           | 14 µM  | PC3  | 0.633 | 0.087 | -0.206 | 5056 |
| 711  | famprofazone            | 11 µM  | MCF7 | 0.633 | 0.084 | -0.209 | 3928 |
| 658  | fosfosal                | 18 µM  | HL60 | 0.633 | 0.06  | -0.232 | 2997 |
| 751  | Prestwick-664           | 8 µM   | MCF7 | 0.633 | 0.111 | -0.181 | 6033 |
| 765  | tretinoin               | 1 µM   | MCF7 | 0.632 | 0.048 | -0.244 | 6971 |
| 690  | gramine                 | 23 µM  | MCF7 | 0.632 | 0.135 | -0.157 | 4118 |
| 750  | LY-294002               | 100 nM | HL60 | 0.632 | 0.077 | -0.215 | 6175 |
| 718  | tridihexethyl           | 11 µM  | PC3  | 0.632 | 0.117 | -0.175 | 5067 |
| 678  | milrinone               | 19 µM  | MCF7 | 0.632 | 0.103 | -0.189 | 3552 |
| 662  | acepromazine            | 9 µM   | MCF7 | 0.632 | 0.07  | -0.222 | 2769 |
| 738  | oxolinic acid           | 15 µM  | MCF7 | 0.632 | 0.103 | -0.189 | 5519 |
| 710  | luteolin                | 14 µM  | PC3  | 0.632 | 0.066 | -0.226 | 6658 |
| 657  | resveratrol             | 18 µM  | MCF7 | 0.632 | 0.064 | -0.228 | 2865 |
| 765  | chlorpromazine          | 1 µM   | MCF7 | 0.632 | 0.102 | -0.189 | 6977 |
| 672  | etidronic acid          | 16 µM  | MCF7 | 0.631 | 0.095 | -0.196 | 3325 |
| 761  | etodolac                | 14 µM  | PC3  | 0.631 | 0.079 | -0.212 | 7246 |
| 656  | norcyclobenzaprine      | 15 µM  | MCF7 | 0.631 | 0.06  | -0.231 | 2830 |
| 502  | carbamazepine           | 100 nM | MCF7 | 0.63  | 0.068 | -0.224 | 952  |
| 506  | acetylsalicylic acid    | 100 µM | MCF7 | 0.63  | 0.056 | -0.235 | 984  |
| 632  | diphemanil metilsulfate | 10 µM  | MCF7 | 0.63  | 0.06  | -0.231 | 1494 |
| 738  | nisoxtine               | 13 µM  | MCF7 | 0.63  | 0.111 | -0.18  | 5516 |
| 682  | eucatropine             | 12 µM  | PC3  | 0.63  | 0.043 | -0.248 | 3759 |
| 658  | araine                  | 15 µM  | HL60 | 0.629 | 0.057 | -0.234 | 3010 |
| 664  | tocainide               | 17 µM  | HL60 | 0.629 | 0.089 | -0.201 | 2931 |
| 753  | ganciclovir             | 16 µM  | PC3  | 0.629 | 0.082 | -0.208 | 6289 |
| 665  | rimexolone              | 11 µM  | HL60 | 0.629 | 0.062 | -0.228 | 2955 |

|     |                             |        |      |       |       |        |      |
|-----|-----------------------------|--------|------|-------|-------|--------|------|
| 633 | azathioprine                | 14 µM  | MCF7 | 0.629 | 0.085 | -0.205 | 1528 |
| 710 | thioguanosine               | 13 µM  | PC3  | 0.629 | 0.092 | -0.198 | 6643 |
| 665 | bethanechol                 | 20 µM  | HL60 | 0.628 | 0.083 | -0.208 | 2975 |
| 747 | natamycin                   | 6 µM   | MCF7 | 0.628 | 0.093 | -0.198 | 7167 |
| 757 | rosiglitazone               | 10 µM  | MCF7 | 0.628 | 0.109 | -0.181 | 5593 |
| 682 | metamizole sodium           | 12 µM  | PC3  | 0.628 | 0.091 | -0.199 | 3754 |
| 720 | phenelzine                  | 17 µM  | MCF7 | 0.628 | 0.107 | -0.183 | 4360 |
| 698 | Prestwick-685               | 11 µM  | PC3  | 0.628 | 0.089 | -0.201 | 7382 |
| 691 | selegiline                  | 18 µM  | MCF7 | 0.628 | 0.103 | -0.187 | 4146 |
| 715 | neostigmine bromide         | 13 µM  | PC3  | 0.627 | 0.1   | -0.19  | 6735 |
| 616 | canrenoic acid              | 10 µM  | PC3  | 0.627 | 0.109 | -0.181 | 2065 |
| 647 | methapyrilene               | 13 µM  | MCF7 | 0.626 | 0.109 | -0.181 | 3205 |
| 701 | hydralazine                 | 20 µM  | PC3  | 0.626 | 0.114 | -0.175 | 4282 |
| 757 | alpha-estradiol             | 10 nM  | MCF7 | 0.626 | 0.093 | -0.196 | 5570 |
| 707 | progesterone                | 13 µM  | MCF7 | 0.626 | 0.065 | -0.224 | 4992 |
| 644 | solanine                    | 5 µM   | HL60 | 0.626 | 0.066 | -0.223 | 2152 |
| 720 | alpha-ergocryptine          | 7 µM   | MCF7 | 0.626 | 0.062 | -0.227 | 4374 |
| 752 | kinetin                     | 19 µM  | MCF7 | 0.626 | 0.087 | -0.202 | 6073 |
| 683 | quinethazone                | 14 µM  | PC3  | 0.625 | 0.073 | -0.216 | 3793 |
| 761 | etamivan                    | 18 µM  | PC3  | 0.625 | 0.108 | -0.181 | 7260 |
| 633 | hesperetin                  | 13 µM  | MCF7 | 0.625 | 0.091 | -0.198 | 1531 |
| 758 | cotinine                    | 23 µM  | MCF7 | 0.625 | 0.068 | -0.221 | 5611 |
| 506 | sirolimus                   | 100 nM | MCF7 | 0.625 | 0.054 | -0.234 | 1001 |
| 659 | ioversol                    | 5 µM   | HL60 | 0.625 | 0.051 | -0.238 | 3026 |
| 694 | atovaquone                  | 11 µM  | MCF7 | 0.625 | 0.064 | -0.225 | 4786 |
| 677 | asiaticoside                | 4 µM   | MCF7 | 0.625 | 0.139 | -0.149 | 3504 |
| 637 | chlorzoxazone               | 24 µM  | MCF7 | 0.624 | 0.104 | -0.184 | 2263 |
| 762 | moracizine                  | 9 µM   | PC3  | 0.624 | 0.065 | -0.223 | 7297 |
| 741 | iobenguane                  | 11 µM  | MCF7 | 0.624 | 0.072 | -0.216 | 6002 |
| 729 | amikacin                    | 7 µM   | MCF7 | 0.624 | 0.057 | -0.231 | 5314 |
| 711 | methylbenzethonium chloride | 9 µM   | MCF7 | 0.623 | 0.073 | -0.214 | 3943 |
| 663 | boldine                     | 12 µM  | MCF7 | 0.622 | 0.057 | -0.23  | 2804 |
| 618 | nitrofurantoin              | 17 µM  | HL60 | 0.622 | 0.102 | -0.185 | 2341 |
| 701 | meclofenoxate               | 14 µM  | PC3  | 0.622 | 0.091 | -0.196 | 4268 |
| 720 | tolbutamide                 | 15 µM  | MCF7 | 0.622 | 0.097 | -0.19  | 4362 |
| 744 | hydrocotarnine              | 13 µM  | MCF7 | 0.622 | 0.092 | -0.195 | 6827 |
| 701 | flumetasone                 | 10 µM  | PC3  | 0.621 | 0.116 | -0.171 | 4272 |

|      |                       |        |      |       |       |        |      |
|------|-----------------------|--------|------|-------|-------|--------|------|
| 708  | bromocriptine         | 5 µM   | MCF7 | 0.621 | 0.111 | -0.176 | 5665 |
| 766  | triprolidine          | 13 µM  | MCF7 | 0.621 | 0.068 | -0.219 | 7008 |
| 682  | dicoumarol            | 12 µM  | PC3  | 0.621 | 0.079 | -0.208 | 3766 |
| 711  | PHA-00851261E         | 10 µM  | MCF7 | 0.621 | 0.105 | -0.182 | 3965 |
| 616  | tamoxifen             | 7 µM   | PC3  | 0.621 | 0.06  | -0.227 | 2050 |
| 737  | diethylcarbamazine    | 10 µM  | MCF7 | 0.62  | 0.081 | -0.206 | 5485 |
| 641  | piperlongumine        | 13 µM  | HL60 | 0.62  | 0.072 | -0.215 | 1764 |
| 664  | memantine             | 19 µM  | HL60 | 0.62  | 0.056 | -0.231 | 2934 |
| 619  | pinacidil             | 16 µM  | HL60 | 0.62  | 0.1   | -0.186 | 2406 |
| 619  | lisinopril            | 9 µM   | HL60 | 0.62  | 0.087 | -0.199 | 2371 |
| 657  | sulfasalazine         | 10 µM  | MCF7 | 0.619 | 0.105 | -0.181 | 2882 |
| 751  | mepenzolate bromide   | 10 µM  | MCF7 | 0.619 | 0.077 | -0.209 | 6024 |
| 677  | torasemide            | 11 µM  | MCF7 | 0.619 | 0.067 | -0.218 | 3517 |
| 702  | eucatropine           | 12 µM  | PC3  | 0.619 | 0.095 | -0.191 | 4316 |
| 700  | fenoprofen            | 7 µM   | MCF7 | 0.618 | 0.079 | -0.206 | 4736 |
| 772  | triflusal             | 16 µM  | MCF7 | 0.618 | 0.099 | -0.186 | 7451 |
| 728  | zomepirac             | 13 µM  | PC3  | 0.618 | 0.071 | -0.215 | 4479 |
| 672  | piromidic acid        | 14 µM  | MCF7 | 0.618 | 0.074 | -0.211 | 3335 |
| 713  | phthalylsulfathiazole | 10 µM  | PC3  | 0.618 | 0.05  | -0.235 | 4653 |
| 755  | tyloxapol             | 4 µM   | MCF7 | 0.618 | 0.07  | -0.216 | 6452 |
| 730  | carbachol             | 22 µM  | MCF7 | 0.617 | 0.062 | -0.224 | 5342 |
| 656  | cetirizine            | 9 µM   | MCF7 | 0.617 | 0.071 | -0.214 | 2829 |
| 741  | tranlycypromine       | 24 µM  | MCF7 | 0.617 | 0.091 | -0.194 | 5996 |
| 642  | pentolonium           | 7 µM   | MCF7 | 0.617 | 0.085 | -0.2   | 2305 |
| 677  | roxarsone             | 15 µM  | MCF7 | 0.617 | 0.117 | -0.168 | 3511 |
| 750  | acetylsalicylic acid  | 100 µM | HL60 | 0.617 | 0.062 | -0.222 | 6164 |
| 626  | sirolimus             | 100 nM | MCF7 | 0.616 | 0.059 | -0.225 | 1646 |
| 627  | mefenamic acid        | 17 µM  | MCF7 | 0.616 | 0.079 | -0.206 | 1699 |
| 626  | LY-294002             | 100 nM | MCF7 | 0.616 | 0.087 | -0.198 | 1641 |
| 1051 | H-89                  | 500 nM | MCF7 | 0.616 | 0.108 | -0.177 | 6878 |
| 1012 | fulvestrant           | 1 µM   | MCF7 | 0.616 | 0.076 | -0.208 | 5964 |
| 645  | metamizole sodium     | 12 µM  | HL60 | 0.616 | 0.114 | -0.171 | 2175 |
| 671  | sulfametoxydiazine    | 14 µM  | MCF7 | 0.616 | 0.057 | -0.227 | 3453 |
| 637  | etofylline            | 18 µM  | MCF7 | 0.615 | 0.103 | -0.181 | 2256 |
| 732  | butamben              | 21 µM  | PC3  | 0.615 | 0.082 | -0.202 | 5792 |
| 765  | acetylsalicylic acid  | 100 µM | MCF7 | 0.615 | 0.08  | -0.205 | 6964 |
| 637  | xylometazoline        | 14 µM  | MCF7 | 0.615 | 0.079 | -0.205 | 2270 |

|      |                           |       |      |       |       |        |      |
|------|---------------------------|-------|------|-------|-------|--------|------|
| 701  | flunixin                  | 8 µM  | PC3  | 0.615 | 0.085 | -0.199 | 4273 |
| 738  | adipiodone                | 4 µM  | MCF7 | 0.615 | 0.064 | -0.22  | 5510 |
| 702  | mepenzolate bromide       | 10 µM | PC3  | 0.615 | 0.106 | -0.178 | 4304 |
| 694  | trimethylcolchicinic acid | 12 µM | MCF7 | 0.615 | 0.098 | -0.186 | 4787 |
| 748  | nomifensine               | 11 µM | MCF7 | 0.614 | 0.08  | -0.204 | 7217 |
| 738  | bupivacaine               | 12 µM | MCF7 | 0.614 | 0.084 | -0.199 | 5537 |
| 695  | simvastatin               | 10 µM | MCF7 | 0.614 | 0.06  | -0.224 | 4828 |
| 743  | berberine                 | 11 µM | MCF7 | 0.613 | 0.059 | -0.224 | 6791 |
| 707  | thioguanosine             | 13 µM | MCF7 | 0.613 | 0.077 | -0.206 | 4989 |
| 648  | kinetin                   | 19 µM | HL60 | 0.613 | 0.041 | -0.242 | 2511 |
| 750  | alpha-estradiol           | 10 nM | HL60 | 0.613 | 0.058 | -0.225 | 6169 |
| 682  | flunisolide               | 9 µM  | PC3  | 0.613 | 0.047 | -0.237 | 3747 |
| 694  | pepstatin                 | 6 µM  | MCF7 | 0.613 | 0.094 | -0.189 | 4790 |
| 688  | phenacetin                | 22 µM | PC3  | 0.612 | 0.071 | -0.212 | 3992 |
| 642  | hydralazine               | 20 µM | MCF7 | 0.612 | 0.077 | -0.205 | 2311 |
| 657  | lobelanidine              | 11 µM | MCF7 | 0.612 | 0.111 | -0.172 | 2897 |
| 754  | ranitidine                | 11 µM | PC3  | 0.612 | 0.079 | -0.204 | 6324 |
| 707  | methoxsalen               | 19 µM | MCF7 | 0.612 | 0.089 | -0.194 | 5007 |
| 678  | cyproterone               | 10 µM | MCF7 | 0.612 | 0.093 | -0.189 | 3545 |
| 663  | bicuculline               | 11 µM | MCF7 | 0.612 | 0.078 | -0.205 | 2796 |
| 630  | arecoline                 | 17 µM | HL60 | 0.611 | 0.085 | -0.198 | 1303 |
| 18   | SC-58125                  | 10 µM | MCF7 | 0.611 | 0.099 | -0.183 | 254  |
| 720  | Prestwick-1100            | 9 µM  | MCF7 | 0.611 | 0.085 | -0.197 | 4356 |
| 682  | indapamide                | 11 µM | PC3  | 0.611 | 0.054 | -0.228 | 3778 |
| 704  | etidronic acid            | 16 µM | PC3  | 0.611 | 0.041 | -0.241 | 4564 |
| 628  | naproxen                  | 17 µM | PC3  | 0.61  | 0.072 | -0.21  | 1828 |
| 743  | dipivefrine               | 10 µM | MCF7 | 0.61  | 0.105 | -0.177 | 6766 |
| 513  | chlorpromazine            | 1 µM  | MCF7 | 0.61  | 0.099 | -0.183 | 1055 |
| 1024 | 3-nitropropionic acid     | 10 µM | MCF7 | 0.61  | 0.156 | -0.126 | 6402 |
| 711  | PHA-00851261E             | 1 µM  | MCF7 | 0.61  | 0.094 | -0.188 | 3968 |
| 617  | pyrantel                  | 11 µM | PC3  | 0.61  | 0.068 | -0.214 | 2097 |
| 753  | ascorbic acid             | 22 µM | PC3  | 0.61  | 0.124 | -0.157 | 6306 |
| 661  | nipecotic acid            | 31 µM | HL60 | 0.609 | 0.07  | -0.212 | 3121 |
| 729  | flucytosine               | 31 µM | MCF7 | 0.609 | 0.052 | -0.229 | 5289 |
| 734  | isoconazole               | 10 µM | PC3  | 0.609 | 0.055 | -0.227 | 5857 |
| 727  | tretinoin                 | 1 µM  | PC3  | 0.609 | 0.108 | -0.174 | 4435 |
| 683  | tolbutamide               | 15 µM | PC3  | 0.609 | 0.054 | -0.227 | 3804 |

|      |                       |       |      |       |       |        |      |
|------|-----------------------|-------|------|-------|-------|--------|------|
| 718  | denatonium benzoate   | 9 µM  | PC3  | 0.609 | 0.081 | -0.2   | 5061 |
| 711  | eldeline              | 8 µM  | MCF7 | 0.608 | 0.086 | -0.194 | 3925 |
| 718  | loracarbef            | 11 µM | PC3  | 0.608 | 0.082 | -0.198 | 5073 |
| 748  | diclofenac            | 13 µM | MCF7 | 0.608 | 0.066 | -0.215 | 7215 |
| 706  | liothyronine          | 6 µM  | MCF7 | 0.607 | 0.118 | -0.162 | 4947 |
| 690  | amiloride             | 13 µM | MCF7 | 0.607 | 0.089 | -0.191 | 4109 |
| 665  | risperidone           | 10 µM | HL60 | 0.607 | 0.066 | -0.215 | 2947 |
| 731  | guanethidine          | 13 µM | PC3  | 0.607 | 0.092 | -0.188 | 5731 |
| 718  | niflumic acid         | 14 µM | PC3  | 0.607 | 0.083 | -0.197 | 5071 |
| 661  | alfaxalone            | 12 µM | HL60 | 0.607 | 0.06  | -0.22  | 3135 |
| 756  | nabumetone            | 18 µM | MCF7 | 0.606 | 0.122 | -0.158 | 6487 |
| 670  | sulfadimidine         | 13 µM | MCF7 | 0.606 | 0.088 | -0.192 | 3422 |
| 695  | corynanthine          | 10 µM | MCF7 | 0.606 | 0.082 | -0.198 | 4811 |
| 756  | ursodeoxycholic acid  | 10 µM | MCF7 | 0.606 | 0.061 | -0.219 | 6484 |
| 749  | verteporfin           | 3 µM  | HL60 | 0.606 | 0.083 | -0.197 | 6133 |
| 752  | tetryzoline           | 17 µM | MCF7 | 0.606 | 0.055 | -0.225 | 6069 |
| 1028 | F0447-0125            | 10 µM | MCF7 | 0.605 | 0.059 | -0.221 | 6424 |
| 671  | methacholine chloride | 20 µM | MCF7 | 0.604 | 0.079 | -0.2   | 3452 |
| 635  | tobramycin            | 9 µM  | HL60 | 0.604 | 0.059 | -0.22  | 2481 |
| 757  | haloperidol           | 10 µM | MCF7 | 0.604 | 0.095 | -0.183 | 5563 |
| 764  | canrenoic acid        | 10 µM | PC3  | 0.603 | 0.108 | -0.171 | 7135 |
| 616  | ursolic acid          | 9 µM  | PC3  | 0.603 | 0.055 | -0.224 | 2067 |
| 657  | molsidomine           | 17 µM | MCF7 | 0.603 | 0.047 | -0.231 | 2862 |
| 708  | niridazole            | 19 µM | MCF7 | 0.603 | 0.08  | -0.199 | 5682 |
| 1092 | BCB000038             | 10 µM | MCF7 | 0.602 | 0.073 | -0.205 | 7542 |
| 738  | sulfadiazine          | 16 µM | MCF7 | 0.602 | 0.086 | -0.192 | 5523 |
| 695  | procyclidine          | 12 µM | MCF7 | 0.602 | 0.077 | -0.201 | 4817 |
| 660  | nitrendipine          | 11 µM | HL60 | 0.602 | 0.064 | -0.215 | 3087 |
| 708  | epiandrosterone       | 14 µM | MCF7 | 0.602 | 0.142 | -0.136 | 5687 |
| 720  | parbendazole          | 16 µM | MCF7 | 0.601 | 0.086 | -0.191 | 4357 |
| 741  | norfloxacin           | 13 µM | MCF7 | 0.601 | 0.105 | -0.173 | 5985 |
| 688  | oxybuprocaine         | 12 µM | PC3  | 0.601 | 0.057 | -0.22  | 3996 |
| 708  | oleandomycin          | 5 µM  | MCF7 | 0.601 | 0.113 | -0.165 | 5676 |
| 629  | metrifonate           | 16 µM | HL60 | 0.6   | 0.059 | -0.218 | 1839 |
| 685  | 6-benzylaminopurine   | 18 µM | MCF7 | 0.6   | 0.047 | -0.23  | 3623 |
| 728  | ampyrone              | 20 µM | PC3  | 0.6   | 0.091 | -0.186 | 4507 |
| 698  | metaraminol           | 9 µM  | PC3  | 0.6   | 0.082 | -0.195 | 7368 |

|      |                        |       |      |       |       |        |      |
|------|------------------------|-------|------|-------|-------|--------|------|
| 1026 | orlistat               | 10 µM | MCF7 | 0.599 | 0.11  | -0.167 | 6415 |
| 1028 | C-75                   | 10 µM | MCF7 | 0.599 | 0.082 | -0.195 | 6423 |
| 634  | amiodarone             | 6 µM  | HL60 | 0.599 | 0.088 | -0.188 | 2434 |
| 729  | hesperidin             | 7 µM  | MCF7 | 0.599 | 0.07  | -0.207 | 5313 |
| 645  | promazine              | 12 µM | HL60 | 0.599 | 0.064 | -0.213 | 2173 |
| 677  | ozagrel                | 15 µM | MCF7 | 0.599 | 0.078 | -0.199 | 3503 |
| 633  | loxapine               | 9 µM  | MCF7 | 0.599 | 0.071 | -0.205 | 1516 |
| 649  | sulfamethoxypyridazine | 14 µM | HL60 | 0.599 | 0.059 | -0.218 | 2550 |
| 617  | etofylline             | 18 µM | PC3  | 0.598 | 0.057 | -0.219 | 2093 |
| 636  | neomycin               | 4 µM  | MCF7 | 0.598 | 0.086 | -0.19  | 2229 |
| 754  | remoxipride            | 10 µM | PC3  | 0.598 | 0.059 | -0.217 | 6342 |
| 744  | benzylpenicillin       | 11 µM | MCF7 | 0.598 | 0.059 | -0.217 | 6839 |
| 656  | etifenin               | 12 µM | MCF7 | 0.597 | 0.075 | -0.201 | 2838 |
| 746  | methazolamide          | 17 µM | MCF7 | 0.597 | 0.078 | -0.198 | 6268 |
| 744  | verteporfin            | 3 µM  | MCF7 | 0.597 | 0.063 | -0.213 | 6817 |
| 632  | amprolium              | 13 µM | MCF7 | 0.597 | 0.085 | -0.191 | 1479 |
| 720  | ethotoin               | 20 µM | MCF7 | 0.597 | 0.122 | -0.154 | 4366 |
| 732  | fluorometholone        | 11 µM | PC3  | 0.597 | 0.079 | -0.197 | 5771 |
| 750  | valproic acid          | 50 µM | HL60 | 0.597 | 0.079 | -0.196 | 6181 |
| 726  | 3-acetylcoumarin       | 21 µM | MCF7 | 0.596 | 0.078 | -0.198 | 5259 |
| 729  | felodipine             | 10 µM | MCF7 | 0.596 | 0.062 | -0.213 | 5294 |
| 634  | digoxin                | 5 µM  | HL60 | 0.595 | 0.121 | -0.155 | 2423 |
| 720  | orphenadrine           | 13 µM | MCF7 | 0.595 | 0.082 | -0.192 | 4359 |
| 708  | kanamycin              | 7 µM  | MCF7 | 0.595 | 0.11  | -0.165 | 5686 |
| 690  | carbarsone             | 15 µM | MCF7 | 0.595 | 0.061 | -0.214 | 4110 |
| 664  | proscillaridin         | 8 µM  | HL60 | 0.595 | 0.088 | -0.187 | 2920 |
| 641  | hydrocotarnine         | 13 µM | HL60 | 0.595 | 0.057 | -0.218 | 1772 |
| 757  | tretinoin              | 1 µM  | MCF7 | 0.595 | 0.077 | -0.197 | 5571 |
| 762  | fenspiride             | 13 µM | PC3  | 0.594 | 0.077 | -0.198 | 7298 |
| 646  | fipexide               | 9 µM  | MCF7 | 0.594 | 0.091 | -0.183 | 3176 |
| 748  | sulfadoxine            | 13 µM | MCF7 | 0.594 | 0.106 | -0.168 | 7205 |
| 619  | ifenprodil             | 8 µM  | HL60 | 0.594 | 0.064 | -0.211 | 2372 |
| 646  | glibenclamide          | 8 µM  | MCF7 | 0.594 | 0.087 | -0.188 | 3163 |
| 753  | dextromethorphan       | 11 µM | PC3  | 0.594 | 0.056 | -0.219 | 6300 |
| 718  | indometacin            | 11 µM | PC3  | 0.593 | 0.07  | -0.204 | 5049 |
| 676  | etofenamate            | 11 µM | MCF7 | 0.593 | 0.088 | -0.186 | 7327 |
| 715  | erythromycin           | 5 µM  | PC3  | 0.593 | 0.128 | -0.145 | 6729 |



|      |                             |       |      |       |       |        |      |
|------|-----------------------------|-------|------|-------|-------|--------|------|
| 732  | saquinavir                  | 5 µM  | PC3  | 0.592 | 0.076 | -0.197 | 5770 |
| 738  | thiocolchicoside            | 7 µM  | MCF7 | 0.592 | 0.096 | -0.178 | 5520 |
| 698  | PNU-0251126                 | 10 µM | PC3  | 0.592 | 0.091 | -0.183 | 7388 |
| 672  | propantheline bromide       | 9 µM  | MCF7 | 0.592 | 0.09  | -0.183 | 3352 |
| 753  | ampicillin                  | 10 µM | PC3  | 0.592 | 0.077 | -0.196 | 6307 |
| 765  | valproic acid               | 50 µM | MCF7 | 0.592 | 0.113 | -0.161 | 6982 |
| 1024 | valdecoxib                  | 10 µM | MCF7 | 0.592 | 0.133 | -0.14  | 6403 |
| 755  | florfenicol                 | 11 µM | MCF7 | 0.592 | 0.076 | -0.197 | 6460 |
| 1090 | CP-319743                   | 10 µM | MCF7 | 0.592 | 0.08  | -0.194 | 7532 |
| 682  | fluocinonide                | 8 µM  | PC3  | 0.592 | 0.065 | -0.209 | 3757 |
| 719  | mefenamic acid              | 17 µM | PC3  | 0.592 | 0.054 | -0.219 | 5109 |
| 718  | levopropoxyphene            | 7 µM  | PC3  | 0.592 | 0.072 | -0.201 | 5083 |
| 642  | lomefloxacin                | 10 µM | MCF7 | 0.592 | 0.068 | -0.205 | 2310 |
| 699  | glycopyrronium bromide      | 10 µM | MCF7 | 0.592 | 0.132 | -0.141 | 4709 |
| 617  | ornidazole                  | 18 µM | PC3  | 0.591 | 0.066 | -0.207 | 2109 |
| 513  | tretinoin                   | 1 µM  | MCF7 | 0.591 | 0.061 | -0.212 | 1049 |
| 678  | ronidazole                  | 20 µM | MCF7 | 0.591 | 0.081 | -0.192 | 3557 |
| 656  | L-methionine sulfoximine    | 22 µM | MCF7 | 0.591 | 0.126 | -0.147 | 2831 |
| 683  | homosalate                  | 15 µM | PC3  | 0.591 | 0.054 | -0.219 | 3797 |
| 738  | lisinopril                  | 9 µM  | MCF7 | 0.591 | 0.093 | -0.18  | 5504 |
| 743  | oxedrine                    | 24 µM | MCF7 | 0.59  | 0.088 | -0.185 | 6798 |
| 670  | meclofenoxate               | 14 µM | MCF7 | 0.59  | 0.054 | -0.218 | 3405 |
| 631  | calcium pantothenate        | 8 µM  | HL60 | 0.59  | 0.074 | -0.199 | 1311 |
| 754  | piribedil                   | 12 µM | PC3  | 0.59  | 0.072 | -0.2   | 6333 |
| 727  | valproic acid               | 50 µM | PC3  | 0.59  | 0.091 | -0.182 | 4446 |
| 691  | tetroquinone                | 21 µM | MCF7 | 0.59  | 0.072 | -0.201 | 4159 |
| 700  | fenbufen                    | 16 µM | MCF7 | 0.59  | 0.066 | -0.206 | 4743 |
| 690  | fusaric acid                | 22 µM | MCF7 | 0.59  | 0.106 | -0.166 | 4105 |
| 680  | clemizole                   | 11 µM | PC3  | 0.59  | 0.062 | -0.211 | 3672 |
| 662  | isocorydine                 | 12 µM | MCF7 | 0.589 | 0.07  | -0.202 | 2780 |
| 670  | flunixin                    | 8 µM  | MCF7 | 0.589 | 0.065 | -0.207 | 3411 |
| 698  | tiapride                    | 11 µM | PC3  | 0.589 | 0.062 | -0.21  | 7362 |
| 734  | diclofenac                  | 13 µM | PC3  | 0.589 | 0.056 | -0.216 | 5861 |
| 695  | amprolium                   | 13 µM | MCF7 | 0.589 | 0.122 | -0.15  | 4825 |
| 712  | niridazole                  | 19 µM | PC3  | 0.589 | 0.042 | -0.23  | 4621 |
| 689  | tolmetin                    | 13 µM | PC3  | 0.589 | 0.093 | -0.179 | 4088 |
| 636  | acetylsalicylsalicylic acid | 13 µM | MCF7 | 0.589 | 0.077 | -0.195 | 2223 |

|      |                      |       |      |       |       |        |      |
|------|----------------------|-------|------|-------|-------|--------|------|
| 695  | cyclopenthiiazide    | 11 µM | MCF7 | 0.588 | 0.053 | -0.219 | 4813 |
| 664  | zalcitabine          | 19 µM | HL60 | 0.588 | 0.058 | -0.213 | 2932 |
| 766  | artemisinin          | 14 µM | MCF7 | 0.588 | 0.055 | -0.217 | 7007 |
| 700  | 6-benzylaminopurine  | 18 µM | MCF7 | 0.588 | 0.086 | -0.186 | 4748 |
| 691  | metacycline          | 8 µM  | MCF7 | 0.588 | 0.07  | -0.202 | 4143 |
| 753  | baclofen             | 19 µM | PC3  | 0.588 | 0.081 | -0.19  | 6313 |
| 765  | alpha-estradiol      | 10 nM | MCF7 | 0.587 | 0.078 | -0.193 | 6970 |
| 754  | scopolamine N-oxide  | 10 µM | PC3  | 0.587 | 0.086 | -0.185 | 6335 |
| 630  | thioguanosine        | 13 µM | HL60 | 0.587 | 0.068 | -0.203 | 1264 |
| 753  | amoxicillin          | 11 µM | PC3  | 0.587 | 0.094 | -0.177 | 6285 |
| 709  | hydrochlorothiazide  | 13 µM | PC3  | 0.587 | 0.087 | -0.184 | 6625 |
| 1074 | CAY-10397            | 10 µM | MCF7 | 0.587 | 0.072 | -0.199 | 7082 |
| 649  | eucatropine          | 12 µM | HL60 | 0.587 | 0.083 | -0.188 | 2556 |
| 761  | ursodeoxycholic acid | 10 µM | PC3  | 0.587 | 0.093 | -0.178 | 7243 |
| 644  | galantamine          | 11 µM | HL60 | 0.586 | 0.092 | -0.178 | 2131 |
| 659  | dimethadione         | 31 µM | HL60 | 0.586 | 0.048 | -0.222 | 3029 |
| 708  | zimeldine            | 10 µM | MCF7 | 0.586 | 0.075 | -0.196 | 5670 |
| 693  | primaquine           | 9 µM  | PC3  | 0.586 | 0.079 | -0.192 | 4263 |
| 772  | acetoexamide         | 12 µM | MCF7 | 0.586 | 0.098 | -0.173 | 7482 |
| 718  | allantoin            | 25 µM | PC3  | 0.586 | 0.072 | -0.198 | 5052 |
| 636  | nalbuphine           | 10 µM | MCF7 | 0.586 | 0.079 | -0.191 | 2225 |
| 630  | amoxicillin          | 11 µM | HL60 | 0.585 | 0.091 | -0.179 | 1265 |
| 682  | bendroflumethiazide  | 9 µM  | PC3  | 0.585 | 0.103 | -0.167 | 3758 |
| 618  | mephenesin           | 22 µM | HL60 | 0.585 | 0.127 | -0.143 | 2342 |
| 719  | telenzepine          | 9 µM  | PC3  | 0.584 | 0.056 | -0.214 | 5096 |
| 762  | ozagrel              | 15 µM | PC3  | 0.584 | 0.071 | -0.199 | 7281 |
| 622  | terbutaline          | 7 µM  | HL60 | 0.584 | 0.063 | -0.207 | 1585 |
| 749  | ramipril             | 10 µM | HL60 | 0.584 | 0.143 | -0.127 | 6150 |
| 728  | riboflavin           | 11 µM | PC3  | 0.583 | 0.104 | -0.166 | 4485 |
| 663  | sulfabenzamide       | 14 µM | MCF7 | 0.583 | 0.066 | -0.204 | 2814 |
| 659  | ganciclovir          | 16 µM | HL60 | 0.583 | 0.057 | -0.212 | 3030 |
| 762  | harmol               | 16 µM | PC3  | 0.583 | 0.107 | -0.162 | 7320 |
| 672  | Prestwick-864        | 35 µM | MCF7 | 0.583 | 0.09  | -0.179 | 3333 |
| 718  | hydrastinine         | 16 µM | PC3  | 0.583 | 0.088 | -0.181 | 5075 |
| 662  | calycanthine         | 12 µM | MCF7 | 0.582 | 0.064 | -0.205 | 2764 |
| 704  | cyanocobalamin       | 3 µM  | PC3  | 0.582 | 0.068 | -0.201 | 4572 |
| 622  | sulfinpyrazone       | 10 µM | HL60 | 0.581 | 0.077 | -0.192 | 1574 |

|      |                                         |       |      |       |       |        |      |
|------|-----------------------------------------|-------|------|-------|-------|--------|------|
| 764  | 1,4-chrysenequinone                     | 15 µM | PC3  | 0.581 | 0.081 | -0.187 | 7139 |
| 706  | nifurtimox                              | 14 µM | MCF7 | 0.581 | 0.074 | -0.194 | 4953 |
| 673  | carbachol                               | 22 µM | MCF7 | 0.581 | 0.117 | -0.152 | 3380 |
| 1001 | estradiol                               | 10 nM | PC3  | 0.581 | 0.116 | -0.153 | 5910 |
| 642  | phenelzine                              | 17 µM | MCF7 | 0.581 | 0.084 | -0.184 | 2319 |
| 711  | metamizole sodium                       | 12 µM | MCF7 | 0.581 | 0.088 | -0.181 | 3929 |
| 682  | citolone                                | 25 µM | PC3  | 0.581 | 0.05  | -0.218 | 3755 |
| 673  | crotamiton                              | 20 µM | MCF7 | 0.581 | 0.133 | -0.135 | 3388 |
| 630  | clebopride                              | 8 µM  | HL60 | 0.581 | 0.089 | -0.179 | 1292 |
| 705  | etidronic acid                          | 16 µM | MCF7 | 0.58  | 0.117 | -0.151 | 4387 |
| 715  | mitoxantrone                            | 8 µM  | PC3  | 0.58  | 0.061 | -0.207 | 6755 |
| 707  | velnacrine                              | 12 µM | MCF7 | 0.58  | 0.102 | -0.166 | 4997 |
| 737  | trimetazidine                           | 12 µM | MCF7 | 0.58  | 0.088 | -0.18  | 5479 |
| 656  | tiabendazole                            | 20 µM | MCF7 | 0.58  | 0.103 | -0.165 | 2840 |
| 751  | Prestwick-674                           | 14 µM | MCF7 | 0.58  | 0.062 | -0.206 | 6034 |
| 36   | fulvestrant                             | 1 µM  | MCF7 | 0.579 | 0.072 | -0.195 | 367  |
| 628  | 8-azaguanine                            | 26 µM | PC3  | 0.579 | 0.105 | -0.162 | 1791 |
| 645  | halcinonide                             | 9 µM  | HL60 | 0.579 | 0.081 | -0.186 | 2185 |
| 747  | suxibuzone                              | 9 µM  | MCF7 | 0.579 | 0.088 | -0.18  | 7163 |
| 618  | 6-benzylaminopurine                     | 18 µM | HL60 | 0.579 | 0.063 | -0.204 | 2351 |
| 753  | nicardipine                             | 8 µM  | PC3  | 0.578 | 0.066 | -0.201 | 6297 |
| 709  | fursultiamine                           | 9 µM  | PC3  | 0.578 | 0.104 | -0.163 | 6630 |
| 1012 | PF-00875133-00                          | 10 µM | MCF7 | 0.578 | 0.075 | -0.192 | 5967 |
| 706  | meclocycline                            | 6 µM  | MCF7 | 0.578 | 0.082 | -0.185 | 4982 |
| 751  | gossypol                                | 8 µM  | MCF7 | 0.577 | 0.044 | -0.222 | 6058 |
| 654  | levothyroxine sodium                    | 5 µM  | MCF7 | 0.577 | 0.092 | -0.175 | 3249 |
| 718  | perhexiline                             | 10 µM | PC3  | 0.577 | 0.102 | -0.165 | 5081 |
| 1090 | 11-deoxy-16,16-dimethylprostaglandin E2 | 10 µM | MCF7 | 0.577 | 0.119 | -0.148 | 7533 |
| 743  | picotamide                              | 10 µM | MCF7 | 0.577 | 0.099 | -0.167 | 6787 |
| 698  | clemizole                               | 11 µM | PC3  | 0.577 | 0.069 | -0.197 | 7371 |
| 698  | Prestwick-665                           | 12 µM | PC3  | 0.577 | 0.099 | -0.167 | 7380 |
| 764  | cefoxitin                               | 9 µM  | PC3  | 0.577 | 0.085 | -0.181 | 7148 |
| 762  | nipecotic acid                          | 31 µM | PC3  | 0.576 | 0.076 | -0.19  | 7296 |
| 642  | tolbutamide                             | 15 µM | MCF7 | 0.576 | 0.101 | -0.166 | 2320 |
| 673  | doxazosin                               | 7 µM  | MCF7 | 0.576 | 0.07  | -0.196 | 3363 |
| 738  | bufexamac                               | 18 µM | MCF7 | 0.576 | 0.095 | -0.171 | 5515 |
| 744  | clofilium tosylate                      | 8 µM  | MCF7 | 0.576 | 0.058 | -0.208 | 6830 |

|      |                        |       |      |       |       |        |      |
|------|------------------------|-------|------|-------|-------|--------|------|
| 644  | retrorsine             | 11 µM | HL60 | 0.576 | 0.12  | -0.146 | 2129 |
| 734  | abamectin              | 5 µM  | PC3  | 0.576 | 0.066 | -0.2   | 5864 |
| 758  | enoxacin               | 12 µM | MCF7 | 0.576 | 0.077 | -0.189 | 5616 |
| 676  | letrozole              | 14 µM | MCF7 | 0.576 | 0.106 | -0.16  | 7336 |
| 637  | scopolamine N-oxide    | 10 µM | MCF7 | 0.576 | 0.092 | -0.174 | 2262 |
| 504  | 5230742                | 17 µM | MCF7 | 0.576 | 0.127 | -0.139 | 862  |
| 764  | ribostamycin           | 7 µM  | PC3  | 0.575 | 0.07  | -0.196 | 7123 |
| 692  | zalcitabine            | 19 µM | PC3  | 0.575 | 0.087 | -0.178 | 4215 |
| 764  | oxedrine               | 24 µM | PC3  | 0.575 | 0.077 | -0.189 | 7150 |
| 753  | melatonin              | 17 µM | PC3  | 0.575 | 0.119 | -0.147 | 6293 |
| 741  | meticrane              | 15 µM | MCF7 | 0.575 | 0.081 | -0.185 | 5984 |
| 755  | clioquinol             | 13 µM | MCF7 | 0.575 | 0.067 | -0.199 | 6461 |
| 710  | prochlorperazine       | 7 µM  | PC3  | 0.575 | 0.063 | -0.202 | 6664 |
| 738  | phensuximide           | 21 µM | MCF7 | 0.575 | 0.098 | -0.167 | 5522 |
| 766  | chloroquine            | 8 µM  | MCF7 | 0.575 | 0.092 | -0.174 | 7012 |
| 687  | parbendazole           | 16 µM | MCF7 | 0.574 | 0.087 | -0.178 | 3881 |
| 634  | neostigmine bromide    | 13 µM | HL60 | 0.574 | 0.057 | -0.208 | 2432 |
| 677  | imidurea               | 10 µM | MCF7 | 0.574 | 0.098 | -0.168 | 3522 |
| 711  | spiramycin             | 5 µM  | MCF7 | 0.574 | 0.088 | -0.177 | 3938 |
| 714  | flucytosine            | 31 µM | PC3  | 0.574 | 0.127 | -0.139 | 6690 |
| 701  | prilocaine             | 16 µM | PC3  | 0.574 | 0.061 | -0.204 | 4284 |
| 706  | lactobionic acid       | 11 µM | MCF7 | 0.574 | 0.057 | -0.208 | 4950 |
| 695  | R-atenolol             | 15 µM | MCF7 | 0.573 | 0.075 | -0.19  | 4841 |
| 703  | 2,6-dimethylpiperidine | 27 µM | PC3  | 0.573 | 0.067 | -0.197 | 4543 |
| 87   | dimethyloxalylglycine  | 1 mM  | PC3  | 0.573 | 0.082 | -0.183 | 584  |
| 644  | xylazine               | 18 µM | HL60 | 0.573 | 0.066 | -0.199 | 2132 |
| 698  | ofloxacin              | 11 µM | PC3  | 0.573 | 0.066 | -0.199 | 7372 |
| 1034 | 5194442                | 20 µM | PC3  | 0.573 | 0.091 | -0.174 | 6553 |
| 627  | carbamazepine          | 17 µM | MCF7 | 0.573 | 0.057 | -0.208 | 1683 |
| 748  | vidarabine             | 15 µM | MCF7 | 0.573 | 0.068 | -0.197 | 7203 |
| 700  | Prestwick-674          | 14 µM | MCF7 | 0.573 | 0.08  | -0.185 | 4738 |
| 630  | pentoxyverine          | 8 µM  | HL60 | 0.573 | 0.059 | -0.205 | 1268 |
| 693  | cetirizine             | 9 µM  | PC3  | 0.572 | 0.097 | -0.167 | 4231 |
| 661  | articaine              | 12 µM | HL60 | 0.572 | 0.08  | -0.184 | 3138 |
| 1038 | PNU-0293363            | 10 µM | PC3  | 0.571 | 0.071 | -0.193 | 6563 |
| 626  | rosiglitazone          | 10 µM | MCF7 | 0.571 | 0.082 | -0.182 | 1658 |
| 39   | tamoxifen              | 1 µM  | MCF7 | 0.571 | 0.08  | -0.184 | 380  |

|      |                           |        |      |       |       |        |      |
|------|---------------------------|--------|------|-------|-------|--------|------|
| 683  | nialamide                 | 13 µM  | PC3  | 0.571 | 0.056 | -0.208 | 3790 |
| 709  | miconazole                | 10 µM  | PC3  | 0.571 | 0.076 | -0.188 | 6615 |
| 635  | thiostrepton              | 2 µM   | HL60 | 0.571 | 0.079 | -0.185 | 2462 |
| 637  | pargyline                 | 20 µM  | MCF7 | 0.571 | 0.083 | -0.18  | 2265 |
| 685  | Prestwick-664             | 8 µM   | MCF7 | 0.571 | 0.07  | -0.194 | 3613 |
| 709  | tracazolate               | 12 µM  | PC3  | 0.571 | 0.075 | -0.189 | 6619 |
| 736  | fenoterol                 | 10 µM  | MCF7 | 0.571 | 0.086 | -0.178 | 5432 |
| 648  | fluorouracine             | 12 µM  | HL60 | 0.571 | 0.055 | -0.209 | 2521 |
| 618  | ketoprofen                | 16 µM  | HL60 | 0.57  | 0.078 | -0.186 | 2354 |
| 710  | methoxsalen               | 19 µM  | PC3  | 0.57  | 0.059 | -0.205 | 6661 |
| 754  | procaine                  | 15 µM  | PC3  | 0.57  | 0.077 | -0.187 | 6329 |
| 686  | eucatropine               | 12 µM  | MCF7 | 0.57  | 0.076 | -0.187 | 3841 |
| 1090 | irinotecan                | 100 µM | MCF7 | 0.57  | 0.064 | -0.199 | 7530 |
| 758  | naloxone                  | 11 µM  | MCF7 | 0.57  | 0.079 | -0.185 | 5606 |
| 726  | enoxacin                  | 12 µM  | MCF7 | 0.57  | 0.093 | -0.17  | 5251 |
| 738  | proguanil                 | 14 µM  | MCF7 | 0.569 | 0.082 | -0.181 | 5506 |
| 1026 | PF-00539758-00            | 10 µM  | MCF7 | 0.569 | 0.101 | -0.162 | 6416 |
| 758  | alfuzosin                 | 9 µM   | MCF7 | 0.569 | 0.091 | -0.172 | 5605 |
| 1071 | MS-275                    | 10 µM  | PC3  | 0.569 | 0.069 | -0.194 | 7074 |
| 772  | Prestwick-981             | 11 µM  | MCF7 | 0.569 | 0.059 | -0.204 | 7464 |
| 692  | benzocaine                | 24 µM  | PC3  | 0.568 | 0.111 | -0.152 | 4224 |
| 705  | terconazole               | 8 µM   | MCF7 | 0.568 | 0.091 | -0.172 | 4407 |
| 725  | nordihydroguaiaretic acid | 1 µM   | MCF7 | 0.568 | 0.084 | -0.179 | 5220 |
| 1065 | AH-6809                   | 1 µM   | PC3  | 0.568 | 0.111 | -0.151 | 7049 |
| 656  | omeprazole                | 12 µM  | MCF7 | 0.568 | 0.09  | -0.172 | 2828 |
| 672  | iodixanol                 | 3 µM   | MCF7 | 0.568 | 0.085 | -0.178 | 3362 |
| 731  | cyclopentolate            | 12 µM  | PC3  | 0.568 | 0.092 | -0.171 | 5734 |
| 506  | alpha-estradiol           | 10 nM  | MCF7 | 0.568 | 0.074 | -0.188 | 990  |
| 703  | spiradoline               | 1 µM   | PC3  | 0.568 | 0.076 | -0.186 | 4553 |
| 635  | phenacetin                | 22 µM  | HL60 | 0.568 | 0.079 | -0.183 | 2471 |
| 756  | denatonium benzoate       | 9 µM   | MCF7 | 0.567 | 0.083 | -0.179 | 6502 |
| 734  | neomycin                  | 4 µM   | PC3  | 0.567 | 0.117 | -0.145 | 5867 |
| 747  | trifluridine              | 14 µM  | MCF7 | 0.567 | 0.044 | -0.218 | 7176 |
| 756  | nisoxetine                | 13 µM  | MCF7 | 0.567 | 0.046 | -0.216 | 6496 |
| 677  | talampicillin             | 8 µM   | MCF7 | 0.566 | 0.122 | -0.139 | 3515 |
| 1021 | orlistat                  | 10 µM  | PC3  | 0.566 | 0.078 | -0.184 | 6388 |
| 637  | thalidomide               | 15 µM  | MCF7 | 0.566 | 0.099 | -0.163 | 2258 |

|      |                       |        |      |       |       |        |      |
|------|-----------------------|--------|------|-------|-------|--------|------|
| 752  | anabasine             | 25 µM  | MCF7 | 0.566 | 0.091 | -0.17  | 6074 |
| 617  | chlorzoxazone         | 24 µM  | PC3  | 0.566 | 0.049 | -0.212 | 2100 |
| 766  | nimesulide            | 13 µM  | MCF7 | 0.566 | 0.083 | -0.179 | 7024 |
| 731  | sulfinpyrazone        | 10 µM  | PC3  | 0.566 | 0.066 | -0.195 | 5753 |
| 659  | aminophylline         | 10 µM  | HL60 | 0.566 | 0.072 | -0.19  | 3036 |
| 692  | minoxidil             | 19 µM  | PC3  | 0.566 | 0.085 | -0.176 | 4216 |
| 1016 | erastin               | 20 µM  | MCF7 | 0.565 | 0.094 | -0.167 | 6364 |
| 704  | lidocaine             | 15 µM  | PC3  | 0.565 | 0.079 | -0.182 | 4596 |
| 752  | suxibuzone            | 9 µM   | MCF7 | 0.565 | 0.082 | -0.179 | 6065 |
| 766  | glafenine             | 10 µM  | MCF7 | 0.565 | 0.058 | -0.203 | 7018 |
| 680  | kawain                | 17 µM  | PC3  | 0.565 | 0.065 | -0.195 | 3670 |
| 616  | nocodazole            | 13 µM  | PC3  | 0.565 | 0.077 | -0.184 | 2076 |
| 627  | dexpanthenol          | 19 µM  | MCF7 | 0.564 | 0.055 | -0.206 | 1680 |
| 690  | 6-azathymine          | 31 µM  | MCF7 | 0.564 | 0.095 | -0.165 | 4106 |
| 730  | hemicholinium         | 7 µM   | MCF7 | 0.564 | 0.051 | -0.209 | 5339 |
| 645  | citolone              | 25 µM  | HL60 | 0.563 | 0.11  | -0.15  | 2176 |
| 736  | budesonide            | 9 µM   | MCF7 | 0.563 | 0.059 | -0.201 | 5431 |
| 682  | flecainide            | 8 µM   | PC3  | 0.563 | 0.115 | -0.145 | 3761 |
| 673  | phthalylsulfathiazole | 10 µM  | MCF7 | 0.563 | 0.077 | -0.184 | 3371 |
| 659  | equilin               | 15 µM  | HL60 | 0.563 | 0.049 | -0.211 | 3039 |
| 692  | propantheline bromide | 9 µM   | PC3  | 0.563 | 0.095 | -0.165 | 4214 |
| 695  | buflomedil            | 12 µM  | MCF7 | 0.563 | 0.116 | -0.144 | 4840 |
| 648  | fluorometholone       | 11 µM  | HL60 | 0.563 | 0.063 | -0.197 | 2509 |
| 713  | latamoxef             | 7 µM   | PC3  | 0.563 | 0.049 | -0.211 | 4648 |
| 755  | prazosin              | 10 µM  | MCF7 | 0.562 | 0.091 | -0.169 | 6475 |
| 617  | piroxicam             | 12 µM  | PC3  | 0.562 | 0.068 | -0.191 | 2089 |
| 737  | indometacin           | 11 µM  | MCF7 | 0.562 | 0.092 | -0.167 | 5468 |
| 710  | megestrol             | 10 µM  | PC3  | 0.562 | 0.132 | -0.128 | 6667 |
| 673  | diclofenamide         | 13 µM  | MCF7 | 0.562 | 0.067 | -0.192 | 3366 |
| 758  | sulfafurazole         | 15 µM  | MCF7 | 0.561 | 0.085 | -0.175 | 5622 |
| 658  | mestranol             | 13 µM  | HL60 | 0.561 | 0.059 | -0.201 | 3008 |
| 766  | disopyramide          | 12 µM  | MCF7 | 0.561 | 0.09  | -0.169 | 7035 |
| 744  | aminophenazone        | 17 µM  | MCF7 | 0.561 | 0.059 | -0.2   | 6818 |
| 626  | sirolimus             | 100 nM | MCF7 | 0.561 | 0.048 | -0.211 | 1632 |
| 748  | bergenin              | 12 µM  | MCF7 | 0.561 | 0.086 | -0.173 | 7224 |
| 672  | theophylline          | 20 µM  | MCF7 | 0.561 | 0.08  | -0.179 | 3326 |
| 612  | isoxsuprine           | 12 µM  | HL60 | 0.56  | 0.069 | -0.19  | 1985 |

|     |                         |       |      |       |       |        |      |
|-----|-------------------------|-------|------|-------|-------|--------|------|
| 658 | piromidic acid          | 14 µM | HL60 | 0.56  | 0.077 | -0.182 | 2996 |
| 645 | Prestwick-664           | 8 µM  | HL60 | 0.56  | 0.1   | -0.159 | 2178 |
| 729 | urapidil                | 9 µM  | MCF7 | 0.559 | 0.134 | -0.124 | 5295 |
| 637 | tranlycypromine         | 24 µM | MCF7 | 0.559 | 0.064 | -0.194 | 2264 |
| 708 | betaxolol               | 12 µM | MCF7 | 0.559 | 0.12  | -0.139 | 5669 |
| 753 | clopamide               | 12 µM | PC3  | 0.559 | 0.08  | -0.178 | 6301 |
| 747 | pseudopelletierine      | 21 µM | MCF7 | 0.559 | 0.064 | -0.194 | 7184 |
| 700 | 0179445-0000            | 10 µM | MCF7 | 0.559 | 0.083 | -0.175 | 4755 |
| 680 | nalidixic acid          | 15 µM | PC3  | 0.558 | 0.086 | -0.172 | 3668 |
| 672 | oxolamine               | 9 µM  | MCF7 | 0.558 | 0.112 | -0.146 | 3344 |
| 731 | trioxysalen             | 18 µM | PC3  | 0.558 | 0.056 | -0.202 | 5736 |
| 689 | cimetidine              | 16 µM | PC3  | 0.558 | 0.092 | -0.166 | 4063 |
| 718 | chloramphenicol         | 12 µM | PC3  | 0.558 | 0.116 | -0.142 | 5047 |
| 702 | pempidine               | 13 µM | PC3  | 0.558 | 0.128 | -0.13  | 4307 |
| 649 | fenoprofen              | 7 µM  | HL60 | 0.557 | 0.056 | -0.201 | 2553 |
| 610 | diphemanil metilsulfate | 10 µM | PC3  | 0.557 | 0.1   | -0.158 | 1912 |
| 701 | lomefloxacin            | 10 µM | PC3  | 0.557 | 0.086 | -0.171 | 4281 |
| 699 | Prestwick-685           | 11 µM | MCF7 | 0.557 | 0.076 | -0.181 | 4705 |
| 685 | prilocaine              | 16 µM | MCF7 | 0.557 | 0.065 | -0.192 | 3624 |
| 756 | scopoletin              | 21 µM | MCF7 | 0.557 | 0.084 | -0.173 | 6510 |
| 698 | pentolonium             | 7 µM  | PC3  | 0.556 | 0.071 | -0.186 | 7375 |
| 737 | ceftazidime             | 6 µM  | MCF7 | 0.556 | 0.065 | -0.192 | 5473 |
| 762 | ketorolac               | 11 µM | PC3  | 0.556 | 0.076 | -0.181 | 7286 |
| 692 | diflunisal              | 16 µM | PC3  | 0.555 | 0.098 | -0.159 | 4210 |
| 685 | Prestwick-674           | 14 µM | MCF7 | 0.555 | 0.07  | -0.186 | 3614 |
| 676 | sitosterol              | 10 µM | MCF7 | 0.555 | 0.08  | -0.177 | 7332 |
| 661 | remoxipride             | 10 µM | HL60 | 0.555 | 0.05  | -0.206 | 3124 |
| 703 | levcycloserine          | 39 µM | PC3  | 0.555 | 0.1   | -0.156 | 4524 |
| 670 | spiramycin              | 5 µM  | MCF7 | 0.555 | 0.074 | -0.182 | 3419 |
| 676 | cefalonium              | 9 µM  | MCF7 | 0.555 | 0.088 | -0.168 | 7341 |
| 729 | flupentixol             | 8 µM  | MCF7 | 0.554 | 0.059 | -0.197 | 5307 |
| 648 | anabasine               | 25 µM | HL60 | 0.554 | 0.084 | -0.172 | 2512 |
| 772 | tetracaine              | 13 µM | MCF7 | 0.554 | 0.081 | -0.175 | 7473 |
| 673 | pentetic acid           | 10 µM | MCF7 | 0.554 | 0.152 | -0.104 | 3387 |
| 731 | cromoglicic acid        | 8 µM  | PC3  | 0.554 | 0.09  | -0.166 | 5754 |
| 633 | erythromycin            | 5 µM  | MCF7 | 0.554 | 0.083 | -0.173 | 1510 |
| 754 | nabumetone              | 18 µM | PC3  | 0.554 | 0.07  | -0.185 | 6327 |

|      |                  |        |      |       |       |        |      |
|------|------------------|--------|------|-------|-------|--------|------|
| 1050 | H-89             | 500 nM | PC3  | 0.553 | 0.087 | -0.168 | 6873 |
| 713  | lorglumide       | 8 µM   | PC3  | 0.553 | 0.066 | -0.189 | 4658 |
| 642  | nalidixic acid   | 15 µM  | MCF7 | 0.553 | 0.058 | -0.198 | 2297 |
| 645  | Prestwick-675    | 10 µM  | HL60 | 0.553 | 0.144 | -0.111 | 2187 |
| 762  | metrifonate      | 16 µM  | PC3  | 0.553 | 0.052 | -0.203 | 7287 |
| 626  | fluphenazine     | 10 µM  | MCF7 | 0.553 | 0.056 | -0.199 | 1662 |
| 672  | iocetamic acid   | 7 µM   | MCF7 | 0.553 | 0.08  | -0.175 | 3361 |
| 738  | prednisolone     | 11 µM  | MCF7 | 0.553 | 0.103 | -0.152 | 5526 |
| 700  | Prestwick-664    | 8 µM   | MCF7 | 0.552 | 0.066 | -0.189 | 4737 |
| 617  | ethosuximide     | 28 µM  | PC3  | 0.551 | 0.072 | -0.183 | 2116 |
| 698  | fludroxycortide  | 9 µM   | PC3  | 0.551 | 0.074 | -0.18  | 7378 |
| 689  | propylthiouracil | 23 µM  | PC3  | 0.551 | 0.066 | -0.189 | 4076 |
| 653  | clozapine        | 12 µM  | MCF7 | 0.551 | 0.083 | -0.171 | 2644 |
| 718  | gemfibrozil      | 16 µM  | PC3  | 0.55  | 0.107 | -0.147 | 5069 |
| 692  | pregnenolone     | 13 µM  | PC3  | 0.55  | 0.088 | -0.166 | 4218 |
| 765  | LY-294002        | 100 nM | MCF7 | 0.55  | 0.12  | -0.134 | 6976 |
| 751  | lanatoside C     | 4 µM   | MCF7 | 0.549 | 0.143 | -0.11  | 6048 |
| 1020 | orlistat         | 10 µM  | MCF7 | 0.549 | 0.118 | -0.136 | 6383 |
| 712  | kanamycin        | 7 µM   | PC3  | 0.549 | 0.077 | -0.177 | 4625 |
| 718  | flufenamic acid  | 14 µM  | PC3  | 0.549 | 0.049 | -0.205 | 5059 |
| 632  | troleandomycin   | 5 µM   | MCF7 | 0.548 | 0.043 | -0.21  | 1465 |
| 618  | mexiletine       | 19 µM  | HL60 | 0.548 | 0.117 | -0.136 | 2364 |
| 671  | methazolamide    | 17 µM  | MCF7 | 0.548 | 0.072 | -0.182 | 3474 |
| 727  | fulvestrant      | 1 µM   | PC3  | 0.548 | 0.086 | -0.167 | 4429 |
| 735  | verapamil        | 8 µM   | MCF7 | 0.548 | 0.095 | -0.159 | 5387 |
| 627  | metformin        | 24 µM  | MCF7 | 0.548 | 0.098 | -0.155 | 1694 |
| 731  | fipexide         | 9 µM   | PC3  | 0.547 | 0.083 | -0.17  | 5737 |
| 752  | cefmetazole      | 8 µM   | MCF7 | 0.547 | 0.088 | -0.164 | 6086 |
| 1071 | PHA-00816795     | 10 µM  | PC3  | 0.547 | 0.101 | -0.152 | 7072 |
| 672  | mestranol        | 13 µM  | MCF7 | 0.547 | 0.1   | -0.152 | 3346 |
| 680  | cefazolin        | 8 µM   | PC3  | 0.546 | 0.101 | -0.151 | 3686 |
| 705  | etamsylate       | 15 µM  | MCF7 | 0.546 | 0.086 | -0.166 | 4399 |
| 651  | securinine       | 18 µM  | HL60 | 0.546 | 0.077 | -0.176 | 2729 |
| 692  | roxithromycin    | 5 µM   | PC3  | 0.546 | 0.095 | -0.157 | 4192 |
| 732  | tremorine        | 15 µM  | PC3  | 0.546 | 0.084 | -0.168 | 5799 |
| 757  | sirolimus        | 100 nM | MCF7 | 0.545 | 0.069 | -0.183 | 5567 |
| 710  | bemegride        | 26 µM  | PC3  | 0.545 | 0.061 | -0.19  | 6668 |



|      |                           |        |      |       |       |        |      |
|------|---------------------------|--------|------|-------|-------|--------|------|
| 641  | ellipticine               | 16 µM  | HL60 | 0.545 | 0.076 | -0.176 | 1765 |
| 685  | levonorgestrel            | 13 µM  | MCF7 | 0.545 | 0.057 | -0.195 | 3606 |
| 513  | acetylsalicylic acid      | 100 µM | MCF7 | 0.545 | 0.05  | -0.201 | 1042 |
| 1023 | C-75                      | 10 µM  | PC3  | 0.545 | 0.097 | -0.154 | 6399 |
| 681  | fenoprofen                | 7 µM   | PC3  | 0.545 | 0.058 | -0.194 | 3714 |
| 1023 | AG-013608                 | 10 µM  | PC3  | 0.545 | 0.076 | -0.176 | 6400 |
| 767  | valproic acid             | 1 mM   | MCF7 | 0.545 | 0.08  | -0.172 | 6929 |
| 688  | ginkgolide A              | 10 µM  | PC3  | 0.544 | 0.073 | -0.179 | 4002 |
| 747  | meropenem                 | 10 µM  | MCF7 | 0.544 | 0.097 | -0.155 | 7180 |
| 618  | trimethoprim              | 14 µM  | HL60 | 0.544 | 0.107 | -0.144 | 2345 |
| 1076 | SC-19220                  | 10 µM  | MCF7 | 0.544 | 0.065 | -0.186 | 7090 |
| 678  | verteporfin               | 3 µM   | MCF7 | 0.543 | 0.094 | -0.157 | 3556 |
| 631  | fusaric acid              | 22 µM  | HL60 | 0.543 | 0.046 | -0.205 | 1308 |
| 694  | norcyclobenzaprine        | 15 µM  | MCF7 | 0.543 | 0.046 | -0.205 | 4776 |
| 610  | khellin                   | 15 µM  | PC3  | 0.543 | 0.085 | -0.165 | 1922 |
| 651  | isopropamide iodide       | 8 µM   | HL60 | 0.543 | 0.085 | -0.165 | 2720 |
| 645  | Prestwick-665             | 12 µM  | HL60 | 0.542 | 0.072 | -0.179 | 2186 |
| 617  | gemfibrozil               | 16 µM  | PC3  | 0.542 | 0.061 | -0.189 | 2113 |
| 661  | proxiphylline             | 17 µM  | HL60 | 0.542 | 0.099 | -0.151 | 3115 |
| 682  | PHA-00851261E             | 10 µM  | PC3  | 0.542 | 0.08  | -0.171 | 3773 |
| 1065 | 6-bromoindirubin-3'-oxime | 500 nM | PC3  | 0.542 | 0.076 | -0.174 | 7048 |
| 737  | chloramphenicol           | 12 µM  | MCF7 | 0.542 | 0.069 | -0.182 | 5466 |
| 710  | ketanserin                | 7 µM   | PC3  | 0.542 | 0.066 | -0.185 | 6649 |
| 634  | butoconazole              | 8 µM   | HL60 | 0.542 | 0.096 | -0.155 | 2427 |
| 756  | Prestwick-981             | 11 µM  | MCF7 | 0.542 | 0.108 | -0.143 | 6504 |
| 672  | benzthiazide              | 9 µM   | MCF7 | 0.542 | 0.069 | -0.181 | 3329 |
| 734  | vidarabine                | 15 µM  | PC3  | 0.542 | 0.074 | -0.176 | 5850 |
| 602  | LY-294002                 | 100 nM | HL60 | 0.541 | 0.069 | -0.181 | 1157 |
| 637  | pentetrazol               | 29 µM  | MCF7 | 0.541 | 0.101 | -0.149 | 2255 |
| 627  | todralazine               | 15 µM  | MCF7 | 0.541 | 0.075 | -0.175 | 1677 |
| 738  | bethanechol               | 20 µM  | MCF7 | 0.541 | 0.086 | -0.164 | 5539 |
| 705  | beclometasone             | 8 µM   | MCF7 | 0.541 | 0.069 | -0.181 | 4403 |
| 711  | benfotiamine              | 9 µM   | MCF7 | 0.541 | 0.091 | -0.159 | 3931 |
| 39   | tacrolimus                | 1 µM   | MCF7 | 0.54  | 0.145 | -0.105 | 378  |
| 657  | etamivan                  | 18 µM  | MCF7 | 0.54  | 0.091 | -0.159 | 2879 |
| 709  | palmatine                 | 10 µM  | PC3  | 0.54  | 0.089 | -0.16  | 6612 |
| 1090 | BCB000039                 | 10 µM  | MCF7 | 0.54  | 0.087 | -0.163 | 7531 |

|      |                           |       |        |       |       |        |      |
|------|---------------------------|-------|--------|-------|-------|--------|------|
| 719  | prednicarbate             | 8 µM  | PC3    | 0.54  | 0.084 | -0.166 | 5119 |
| 676  | Prestwick-984             | 9 µM  | MCF7   | 0.539 | 0.084 | -0.165 | 7323 |
| 635  | tiabendazole              | 20 µM | HL60   | 0.539 | 0.077 | -0.172 | 2479 |
| 1074 | PHA-00846566E             | 10 µM | MCF7   | 0.539 | 0.083 | -0.166 | 7081 |
| 764  | monocrotaline             | 12 µM | PC3    | 0.539 | 0.077 | -0.172 | 7127 |
| 647  | alfuzosin                 | 9 µM  | MCF7   | 0.539 | 0.072 | -0.177 | 3203 |
| 755  | pralidoxime               | 23 µM | MCF7   | 0.539 | 0.124 | -0.125 | 6443 |
| 754  | proxymetacaine            | 12 µM | PC3    | 0.539 | 0.057 | -0.192 | 6332 |
| 708  | crotamiton                | 20 µM | MCF7   | 0.538 | 0.108 | -0.141 | 5689 |
| 647  | methylethergometrine      | 9 µM  | MCF7   | 0.538 | 0.076 | -0.173 | 3222 |
| 751  | sulfachlorpyridazine      | 14 µM | MCF7   | 0.538 | 0.088 | -0.16  | 6046 |
| 736  | procaine                  | 15 µM | MCF7   | 0.538 | 0.121 | -0.128 | 5430 |
| 737  | octopamine                | 21 µM | MCF7   | 0.538 | 0.083 | -0.166 | 5469 |
| 678  | estriol                   | 14 µM | MCF7   | 0.537 | 0.098 | -0.15  | 3563 |
| 762  | iobenguane                | 11 µM | PC3    | 0.537 | 0.059 | -0.189 | 7299 |
| 74   | nordihydroguaiaretic acid | 1 µM  | ssMCF7 | 0.537 | 0.072 | -0.176 | 524  |
| 738  | flucloxacillin            | 8 µM  | MCF7   | 0.537 | 0.115 | -0.133 | 5527 |
| 665  | spaglamic acid            | 13 µM | HL60   | 0.536 | 0.103 | -0.145 | 2962 |
| 617  | tranlycypromine           | 24 µM | PC3    | 0.536 | 0.05  | -0.198 | 2101 |
| 764  | carbinoxamine             | 10 µM | PC3    | 0.536 | 0.075 | -0.173 | 7138 |
| 695  | minaprine                 | 11 µM | MCF7   | 0.536 | 0.086 | -0.162 | 4814 |
| 640  | artemisinin               | 14 µM | HL60   | 0.536 | 0.076 | -0.172 | 1714 |
| 646  | quinidine                 | 11 µM | MCF7   | 0.536 | 0.08  | -0.167 | 3191 |
| 743  | anabasine                 | 25 µM | MCF7   | 0.536 | 0.106 | -0.141 | 6774 |
| 651  | ebesen                    | 15 µM | HL60   | 0.534 | 0.055 | -0.192 | 2717 |
| 743  | nocodazole                | 13 µM | MCF7   | 0.533 | 0.063 | -0.184 | 6793 |
| 616  | picotamide                | 10 µM | PC3    | 0.533 | 0.068 | -0.178 | 2070 |
| 671  | pridinol                  | 10 µM | MCF7   | 0.533 | 0.056 | -0.191 | 3456 |
| 718  | norethisterone            | 13 µM | PC3    | 0.533 | 0.074 | -0.173 | 5055 |
| 513  | alpha-estradiol           | 10 nM | MCF7   | 0.533 | 0.042 | -0.204 | 1048 |
| 762  | proxiphylline             | 17 µM | PC3    | 0.533 | 0.069 | -0.177 | 7290 |
| 627  | nifedipine                | 12 µM | MCF7   | 0.533 | 0.072 | -0.174 | 1692 |
| 662  | hydroquinine              | 9 µM  | MCF7   | 0.532 | 0.115 | -0.131 | 2767 |
| 743  | yohimbine                 | 10 µM | MCF7   | 0.532 | 0.094 | -0.152 | 6777 |
| 732  | hexylcaine                | 13 µM | PC3    | 0.532 | 0.085 | -0.16  | 5768 |
| 762  | imipenem                  | 13 µM | PC3    | 0.532 | 0.057 | -0.189 | 7294 |
| 756  | Prestwick-920             | 14 µM | MCF7   | 0.532 | 0.075 | -0.171 | 6497 |

|     |                          |       |      |       |       |        |      |
|-----|--------------------------|-------|------|-------|-------|--------|------|
| 715 | ethaverine               | 9 µM  | PC3  | 0.532 | 0.074 | -0.171 | 6737 |
| 615 | cloxacillin              | 9 µM  | HL60 | 0.531 | 0.074 | -0.171 | 1443 |
| 677 | procarbazine             | 16 µM | MCF7 | 0.531 | 0.05  | -0.195 | 3533 |
| 758 | probucol                 | 8 µM  | MCF7 | 0.531 | 0.073 | -0.173 | 5626 |
| 673 | sulconazole              | 9 µM  | MCF7 | 0.531 | 0.071 | -0.174 | 3373 |
| 725 | haloperidol              | 10 µM | MCF7 | 0.531 | 0.065 | -0.18  | 5200 |
| 714 | tacrine                  | 16 µM | PC3  | 0.53  | 0.119 | -0.126 | 6698 |
| 705 | bicuculline              | 11 µM | MCF7 | 0.53  | 0.071 | -0.174 | 4397 |
| 753 | dobutamine               | 12 µM | PC3  | 0.53  | 0.072 | -0.173 | 6286 |
| 764 | cycloserine              | 39 µM | PC3  | 0.53  | 0.085 | -0.159 | 7134 |
| 749 | cyclopentolate           | 12 µM | HL60 | 0.53  | 0.069 | -0.176 | 6132 |
| 755 | N-acetyl-L-leucine       | 23 µM | MCF7 | 0.53  | 0.099 | -0.145 | 6462 |
| 646 | cinnarizine              | 11 µM | MCF7 | 0.53  | 0.079 | -0.166 | 3175 |
| 731 | etanidazole              | 19 µM | PC3  | 0.53  | 0.06  | -0.185 | 5730 |
| 749 | azaperone                | 12 µM | HL60 | 0.529 | 0.066 | -0.179 | 6151 |
| 733 | pyridoxine               | 19 µM | PC3  | 0.529 | 0.083 | -0.162 | 5813 |
| 689 | L-methionine sulfoximine | 22 µM | PC3  | 0.529 | 0.113 | -0.131 | 4070 |
| 766 | dyclonine                | 12 µM | MCF7 | 0.528 | 0.093 | -0.151 | 7022 |
| 735 | esculin                  | 12 µM | MCF7 | 0.528 | 0.049 | -0.195 | 5411 |
| 685 | meclofenoxate            | 14 µM | MCF7 | 0.528 | 0.055 | -0.189 | 3605 |
| 711 | citolone                 | 25 µM | MCF7 | 0.527 | 0.085 | -0.159 | 3930 |
| 672 | nafcillin                | 9 µM  | MCF7 | 0.527 | 0.08  | -0.163 | 3323 |
| 627 | triflupromazine          | 10 µM | MCF7 | 0.527 | 0.048 | -0.196 | 1691 |
| 766 | mecamylamine             | 20 µM | MCF7 | 0.527 | 0.072 | -0.171 | 7023 |
| 719 | flumequine               | 15 µM | PC3  | 0.527 | 0.066 | -0.178 | 5104 |
| 693 | minaprine                | 11 µM | PC3  | 0.527 | 0.085 | -0.159 | 4230 |
| 732 | oxytetracycline          | 8 µM  | PC3  | 0.527 | 0.061 | -0.183 | 5772 |
| 761 | morantel                 | 11 µM | PC3  | 0.526 | 0.089 | -0.154 | 7250 |
| 682 | furaltadone              | 11 µM | PC3  | 0.526 | 0.075 | -0.168 | 3756 |
| 680 | PNU-0251126              | 10 µM | PC3  | 0.526 | 0.051 | -0.192 | 3689 |
| 647 | ketanserine              | 7 µM  | MCF7 | 0.526 | 0.038 | -0.205 | 3209 |
| 708 | dioxybenzone             | 16 µM | MCF7 | 0.526 | 0.083 | -0.16  | 5699 |
| 718 | ornidazole               | 18 µM | PC3  | 0.526 | 0.084 | -0.158 | 5064 |
| 732 | bupropion                | 14 µM | PC3  | 0.526 | 0.077 | -0.165 | 5782 |
| 698 | griseofulvin             | 11 µM | PC3  | 0.525 | 0.051 | -0.192 | 7363 |
| 655 | colecalfiferol           | 10 µM | MCF7 | 0.525 | 0.09  | -0.153 | 3298 |
| 705 | levodopa                 | 20 µM | MCF7 | 0.525 | 0.077 | -0.165 | 4394 |

|      |                          |        |      |       |       |        |      |
|------|--------------------------|--------|------|-------|-------|--------|------|
| 637  | aztreonam                | 9 µM   | MCF7 | 0.525 | 0.115 | -0.127 | 2282 |
| 711  | proglumide               | 12 µM  | MCF7 | 0.524 | 0.083 | -0.16  | 3972 |
| 702  | flunisolide              | 9 µM   | PC3  | 0.524 | 0.066 | -0.176 | 4303 |
| 673  | rolitetracycline         | 8 µM   | MCF7 | 0.523 | 0.081 | -0.161 | 3369 |
| 645  | Prestwick-674            | 14 µM  | HL60 | 0.522 | 0.062 | -0.179 | 2179 |
| 646  | oxytetracycline          | 8 µM   | MCF7 | 0.522 | 0.067 | -0.174 | 3170 |
| 713  | alfuzosin                | 9 µM   | PC3  | 0.522 | 0.042 | -0.199 | 4644 |
| 712  | betaxolol                | 12 µM  | PC3  | 0.522 | 0.083 | -0.158 | 4608 |
| 629  | dexpanthenol             | 19 µM  | HL60 | 0.522 | 0.06  | -0.181 | 1844 |
| 635  | L-methionine sulfoximine | 22 µM  | HL60 | 0.522 | 0.055 | -0.186 | 2470 |
| 771  | pergolide                | 10 µM  | MCF7 | 0.522 | 0.081 | -0.16  | 7434 |
| 752  | sulfamethizole           | 15 µM  | MCF7 | 0.521 | 0.073 | -0.168 | 6099 |
| 734  | glibenclamide            | 8 µM   | PC3  | 0.521 | 0.046 | -0.195 | 5849 |
| 755  | metyrapone               | 18 µM  | MCF7 | 0.521 | 0.103 | -0.138 | 6447 |
| 712  | capsaicin                | 13 µM  | PC3  | 0.521 | 0.051 | -0.19  | 4612 |
| 513  | valproic acid            | 50 µM  | MCF7 | 0.521 | 0.091 | -0.15  | 1060 |
| 640  | propafenone              | 11 µM  | HL60 | 0.521 | 0.064 | -0.177 | 1722 |
| 754  | budesonide               | 9 µM   | PC3  | 0.52  | 0.044 | -0.196 | 6330 |
| 678  | piperidolate             | 11 µM  | MCF7 | 0.52  | 0.089 | -0.151 | 3551 |
| 691  | propylthiouracil         | 23 µM  | MCF7 | 0.52  | 0.06  | -0.18  | 4157 |
| 654  | primaquine               | 9 µM   | MCF7 | 0.52  | 0.056 | -0.184 | 3279 |
| 709  | hexamethonium bromide    | 10 µM  | PC3  | 0.52  | 0.093 | -0.148 | 6620 |
| 635  | pyrazinamide             | 32 µM  | HL60 | 0.52  | 0.059 | -0.181 | 2478 |
| 718  | octopamine               | 21 µM  | PC3  | 0.52  | 0.081 | -0.159 | 5050 |
| 678  | trichostatin A           | 100 nM | MCF7 | 0.52  | 0.087 | -0.153 | 3566 |
| 707  | colecalfiferol           | 10 µM  | MCF7 | 0.52  | 0.098 | -0.142 | 5002 |
| 682  | phentolamine             | 13 µM  | PC3  | 0.52  | 0.066 | -0.175 | 3779 |
| 646  | mepyramine               | 10 µM  | MCF7 | 0.52  | 0.096 | -0.144 | 3184 |
| 610  | amiloride                | 13 µM  | PC3  | 0.52  | 0.089 | -0.151 | 1890 |
| 1022 | AG-013608                | 10 µM  | MCF7 | 0.519 | 0.086 | -0.154 | 6395 |
| 732  | ondansetron              | 12 µM  | PC3  | 0.519 | 0.122 | -0.118 | 5796 |
| 741  | imipenem                 | 13 µM  | MCF7 | 0.519 | 0.061 | -0.179 | 5997 |
| 711  | sulfadimidine            | 13 µM  | MCF7 | 0.519 | 0.07  | -0.17  | 3940 |
| 712  | altretamine              | 19 µM  | PC3  | 0.519 | 0.09  | -0.149 | 4627 |
| 673  | nicotinic acid           | 32 µM  | MCF7 | 0.519 | 0.085 | -0.155 | 3381 |
| 670  | glycopyrronium bromide   | 10 µM  | MCF7 | 0.519 | 0.091 | -0.149 | 3427 |
| 633  | diltiazem                | 9 µM   | MCF7 | 0.518 | 0.091 | -0.148 | 1532 |

|      |                          |       |      |       |       |        |      |
|------|--------------------------|-------|------|-------|-------|--------|------|
| 744  | piretanide               | 11 µM | MCF7 | 0.518 | 0.053 | -0.186 | 6828 |
| 504  | blebbistatin             | 17 µM | MCF7 | 0.518 | 0.075 | -0.164 | 837  |
| 613  | amoxapine                | 13 µM | HL60 | 0.518 | 0.045 | -0.195 | 2013 |
| 647  | debrisoquine             | 9 µM  | MCF7 | 0.518 | 0.067 | -0.172 | 3207 |
| 680  | metaraminol              | 9 µM  | PC3  | 0.518 | 0.102 | -0.137 | 3669 |
| 618  | orphenadrine             | 13 µM | HL60 | 0.517 | 0.089 | -0.15  | 2356 |
| 1053 | SB-202190                | 1 µM  | MCF7 | 0.517 | 0.072 | -0.166 | 6887 |
| 746  | lidoflazine              | 8 µM  | MCF7 | 0.517 | 0.056 | -0.183 | 6278 |
| 680  | Prestwick-665            | 12 µM | PC3  | 0.516 | 0.043 | -0.195 | 3681 |
| 755  | flucytosine              | 31 µM | MCF7 | 0.516 | 0.109 | -0.129 | 6450 |
| 727  | clozapine                | 10 µM | PC3  | 0.516 | 0.058 | -0.18  | 4453 |
| 764  | naproxen                 | 16 µM | PC3  | 0.516 | 0.076 | -0.162 | 7146 |
| 702  | furaltadone              | 11 µM | PC3  | 0.515 | 0.076 | -0.162 | 4313 |
| 706  | Chicago Sky Blue 6B      | 4 µM  | MCF7 | 0.515 | 0.118 | -0.12  | 4971 |
| 766  | etodolac                 | 14 µM | MCF7 | 0.515 | 0.089 | -0.148 | 7006 |
| 660  | prasterone               | 12 µM | HL60 | 0.515 | 0.065 | -0.173 | 3097 |
| 718  | mafenide                 | 18 µM | PC3  | 0.515 | 0.075 | -0.162 | 5079 |
| 627  | 8-azaguanine             | 26 µM | MCF7 | 0.514 | 0.062 | -0.176 | 1670 |
| 737  | roxarsone                | 15 µM | MCF7 | 0.514 | 0.095 | -0.143 | 5470 |
| 646  | bupropion                | 14 µM | MCF7 | 0.514 | 0.073 | -0.165 | 3180 |
| 657  | dirithromycin            | 5 µM  | MCF7 | 0.514 | 0.073 | -0.164 | 2863 |
| 758  | azathioprine             | 14 µM | MCF7 | 0.514 | 0.084 | -0.154 | 5627 |
| 1059 | NS-398                   | 10 µM | MCF7 | 0.514 | 0.091 | -0.147 | 6911 |
| 644  | bicuculline              | 11 µM | HL60 | 0.514 | 0.109 | -0.128 | 2139 |
| 630  | oxantel                  | 7 µM  | HL60 | 0.513 | 0.078 | -0.159 | 1277 |
| 619  | indometacin              | 11 µM | HL60 | 0.513 | 0.06  | -0.177 | 2377 |
| 755  | dioxybenzone             | 16 µM | MCF7 | 0.513 | 0.084 | -0.153 | 6478 |
| 732  | methanethinium bromide   | 10 µM | PC3  | 0.513 | 0.091 | -0.146 | 5780 |
| 689  | metrizamide              | 5 µM  | PC3  | 0.513 | 0.099 | -0.138 | 4075 |
| 690  | N-acetyl-L-aspartic acid | 23 µM | MCF7 | 0.513 | 0.066 | -0.171 | 4125 |
| 719  | todalazine               | 15 µM | PC3  | 0.512 | 0.049 | -0.188 | 5087 |
| 627  | sulfacetamide            | 16 µM | MCF7 | 0.512 | 0.051 | -0.185 | 1695 |
| 687  | quinethazone             | 14 µM | MCF7 | 0.512 | 0.095 | -0.142 | 3875 |
| 603  | fulvestrant              | 1 µM  | PC3  | 0.512 | 0.085 | -0.151 | 1205 |
| 694  | idoxuridine              | 11 µM | MCF7 | 0.512 | 0.082 | -0.154 | 4785 |
| 700  | PNU-0230031              | 1 µM  | MCF7 | 0.512 | 0.102 | -0.134 | 4757 |
| 732  | tretinoin                | 13 µM | PC3  | 0.512 | 0.049 | -0.188 | 5767 |

|      |                  |       |      |       |       |        |      |
|------|------------------|-------|------|-------|-------|--------|------|
| 729  | glycocholic acid | 9 µM  | MCF7 | 0.512 | 0.068 | -0.168 | 5316 |
| 733  | isoetarine       | 12 µM | PC3  | 0.512 | 0.071 | -0.165 | 5812 |
| 7    | rofecoxib        | 10 µM | MCF7 | 0.512 | 0.062 | -0.174 | 166  |
| 713  | guanfacine       | 14 µM | PC3  | 0.511 | 0.058 | -0.178 | 4660 |
| 732  | methazolamide    | 17 µM | PC3  | 0.511 | 0.093 | -0.143 | 5794 |
| 677  | moracizine       | 9 µM  | MCF7 | 0.511 | 0.084 | -0.152 | 3520 |
| 709  | SR-95639A        | 10 µM | PC3  | 0.51  | 0.091 | -0.144 | 6632 |
| 729  | primidone        | 18 µM | MCF7 | 0.51  | 0.059 | -0.176 | 5323 |
| 635  | probenecid       | 14 µM | HL60 | 0.51  | 0.041 | -0.194 | 2464 |
| 651  | drofenine        | 11 µM | HL60 | 0.51  | 0.069 | -0.167 | 2714 |
| 733  | trifluridine     | 14 µM | PC3  | 0.51  | 0.103 | -0.132 | 5819 |
| 738  | pyrantel         | 11 µM | MCF7 | 0.509 | 0.091 | -0.144 | 5513 |
| 729  | florfenicol      | 11 µM | MCF7 | 0.509 | 0.08  | -0.156 | 5300 |
| 708  | practolol        | 15 µM | MCF7 | 0.509 | 0.108 | -0.127 | 5664 |
| 610  | lidocaine        | 15 µM | PC3  | 0.509 | 0.106 | -0.129 | 1917 |
| 692  | canavanine       | 14 µM | PC3  | 0.509 | 0.112 | -0.123 | 4197 |
| 635  | selegiline       | 18 µM | HL60 | 0.508 | 0.045 | -0.19  | 2465 |
| 712  | bromocriptine    | 5 µM  | PC3  | 0.508 | 0.068 | -0.167 | 4604 |
| 700  | nefopam          | 14 µM | MCF7 | 0.508 | 0.096 | -0.139 | 4752 |
| 660  | meglumine        | 20 µM | HL60 | 0.508 | 0.053 | -0.181 | 3068 |
| 673  | (+)-isoprenaline | 11 µM | MCF7 | 0.507 | 0.084 | -0.15  | 3384 |
| 627  | morantel         | 11 µM | MCF7 | 0.507 | 0.065 | -0.169 | 1676 |
| 1057 | STOCK1N-28457    | 20 µM | MCF7 | 0.507 | 0.085 | -0.149 | 6906 |
| 708  | naringin         | 7 µM  | MCF7 | 0.507 | 0.131 | -0.103 | 5666 |
| 745  | fluorouracil     | 12 µM | MCF7 | 0.507 | 0.076 | -0.158 | 6219 |
| 764  | picotamide       | 10 µM | PC3  | 0.507 | 0.069 | -0.165 | 7140 |
| 712  | practolol        | 15 µM | PC3  | 0.506 | 0.07  | -0.164 | 4603 |
| 685  | flumetasone      | 10 µM | MCF7 | 0.506 | 0.081 | -0.152 | 3610 |
| 701  | tropicamide      | 14 µM | PC3  | 0.506 | 0.084 | -0.149 | 4280 |
| 686  | flunisolide      | 9 µM  | MCF7 | 0.506 | 0.133 | -0.101 | 3828 |
| 751  | promazine        | 12 µM | MCF7 | 0.506 | 0.074 | -0.16  | 6028 |
| 714  | nicotinic acid   | 32 µM | PC3  | 0.506 | 0.082 | -0.151 | 6702 |
| 1002 | PF-00562151-00   | 10 µM | MCF7 | 0.506 | 0.092 | -0.142 | 5917 |
| 754  | iopanoic acid    | 7 µM  | PC3  | 0.506 | 0.089 | -0.145 | 6348 |
| 712  | naringin         | 7 µM  | PC3  | 0.505 | 0.047 | -0.186 | 4605 |
| 719  | parthenolide     | 16 µM | PC3  | 0.505 | 0.056 | -0.177 | 5105 |
| 647  | sulfafurazole    | 15 µM | MCF7 | 0.505 | 0.093 | -0.141 | 3218 |

|      |                           |        |      |       |       |        |      |
|------|---------------------------|--------|------|-------|-------|--------|------|
| 633  | guanabenz                 | 14 µM  | MCF7 | 0.505 | 0.114 | -0.119 | 1544 |
| 617  | oxolinic acid             | 15 µM  | PC3  | 0.505 | 0.101 | -0.132 | 2103 |
| 752  | fluorometholone           | 11 µM  | MCF7 | 0.505 | 0.082 | -0.152 | 6071 |
| 664  | metacycline               | 8 µM   | HL60 | 0.504 | 0.05  | -0.183 | 2901 |
| 616  | clindamycin               | 9 µM   | PC3  | 0.504 | 0.082 | -0.151 | 2057 |
| 731  | sulfametoxydiazine        | 14 µM  | PC3  | 0.504 | 0.056 | -0.177 | 5732 |
| 733  | benzydamine               | 12 µM  | PC3  | 0.504 | 0.104 | -0.129 | 5811 |
| 60   | tretinoin                 | 1 µM   | PC3  | 0.504 | 0.072 | -0.16  | 447  |
| 711  | pempidine                 | 13 µM  | MCF7 | 0.504 | 0.106 | -0.126 | 3926 |
| 645  | heliotrine                | 13 µM  | HL60 | 0.504 | 0.041 | -0.192 | 2180 |
| 677  | mecamylamine              | 20 µM  | MCF7 | 0.504 | 0.103 | -0.129 | 3525 |
| 695  | sulfaguanidine            | 19 µM  | MCF7 | 0.504 | 0.077 | -0.155 | 4839 |
| 718  | minocycline               | 8 µM   | PC3  | 0.503 | 0.055 | -0.178 | 5077 |
| 734  | milrinone                 | 19 µM  | PC3  | 0.503 | 0.079 | -0.154 | 5856 |
| 751  | famprofazone              | 11 µM  | MCF7 | 0.503 | 0.06  | -0.172 | 6029 |
| 700  | prilocaine                | 16 µM  | MCF7 | 0.503 | 0.068 | -0.164 | 4749 |
| 764  | yohimbine                 | 10 µM  | PC3  | 0.503 | 0.067 | -0.165 | 7130 |
| 665  | tridihexethyl             | 11 µM  | HL60 | 0.503 | 0.056 | -0.176 | 2964 |
| 719  | pyrantel                  | 11 µM  | PC3  | 0.502 | 0.06  | -0.172 | 5088 |
| 640  | phenindione               | 18 µM  | HL60 | 0.502 | 0.082 | -0.15  | 1718 |
| 615  | levamisole                | 17 µM  | HL60 | 0.502 | 0.073 | -0.159 | 1410 |
| 610  | tolnaftate                | 13 µM  | PC3  | 0.502 | 0.09  | -0.141 | 1919 |
| 659  | digoxigenin               | 10 µM  | HL60 | 0.501 | 0.092 | -0.14  | 3060 |
| 747  | nalbuphine                | 10 µM  | MCF7 | 0.501 | 0.091 | -0.141 | 7177 |
| 1079 | 6-bromoindirubin-3'-oxime | 500 nM | PC3  | 0.501 | 0.062 | -0.169 | 7106 |
| 737  | adrenosterone             | 13 µM  | MCF7 | 0.501 | 0.108 | -0.123 | 5464 |
| 726  | sulfafurazole             | 15 µM  | MCF7 | 0.501 | 0.049 | -0.182 | 5257 |
| 673  | ganciclovir               | 16 µM  | MCF7 | 0.501 | 0.064 | -0.167 | 3368 |
| 741  | nipecotic acid            | 31 µM  | MCF7 | 0.501 | 0.081 | -0.151 | 5999 |
| 733  | dexpropranolol            | 14 µM  | PC3  | 0.501 | 0.047 | -0.184 | 5814 |
| 753  | metitepine                | 8 µM   | PC3  | 0.501 | 0.123 | -0.108 | 6312 |
| 704  | bacampicillin             | 8 µM   | PC3  | 0.501 | 0.063 | -0.169 | 4592 |
| 734  | harmine                   | 16 µM  | PC3  | 0.501 | 0.082 | -0.149 | 5855 |
| 713  | meclozine                 | 9 µM   | PC3  | 0.5   | 0.038 | -0.193 | 4646 |
| 618  | clemizole                 | 11 µM  | HL60 | 0.5   | 0.077 | -0.154 | 2339 |
| 617  | norfloxacin               | 13 µM  | PC3  | 0.5   | 0.068 | -0.163 | 2090 |
| 744  | isocorydine               | 12 µM  | MCF7 | 0.5   | 0.066 | -0.165 | 6843 |

|      |                      |        |      |       |       |        |      |
|------|----------------------|--------|------|-------|-------|--------|------|
| 709  | omeprazole           | 12 µM  | PC3  | 0.499 | 0.067 | -0.164 | 6606 |
| 659  | 3-acetylcoumarin     | 21 µM  | HL60 | 0.499 | 0.04  | -0.191 | 3044 |
| 622  | streptomycin         | 3 µM   | HL60 | 0.499 | 0.063 | -0.168 | 1578 |
| 725  | LY-294002            | 100 nM | MCF7 | 0.499 | 0.098 | -0.132 | 5213 |
| 687  | chlorambucil         | 13 µM  | MCF7 | 0.499 | 0.078 | -0.152 | 3869 |
| 1092 | IC-86621             | 1 µM   | MCF7 | 0.498 | 0.103 | -0.127 | 7543 |
| 764  | drofenine            | 11 µM  | PC3  | 0.498 | 0.063 | -0.167 | 7129 |
| 616  | diazoxide            | 17 µM  | PC3  | 0.498 | 0.09  | -0.14  | 2052 |
| 746  | skimmianine          | 15 µM  | MCF7 | 0.498 | 0.076 | -0.154 | 6242 |
| 616  | mianserin            | 13 µM  | PC3  | 0.498 | 0.093 | -0.137 | 2068 |
| 680  | pentolonium          | 7 µM   | PC3  | 0.498 | 0.076 | -0.153 | 3676 |
| 752  | ramifenazone         | 14 µM  | MCF7 | 0.498 | 0.106 | -0.124 | 6097 |
| 634  | velnacrine           | 12 µM  | HL60 | 0.497 | 0.073 | -0.157 | 2430 |
| 1090 | fulvestrant          | 1 µM   | MCF7 | 0.497 | 0.078 | -0.151 | 7534 |
| 750  | clozapine            | 10 µM  | HL60 | 0.497 | 0.095 | -0.134 | 6188 |
| 732  | Prestwick-1085       | 15 µM  | PC3  | 0.497 | 0.093 | -0.136 | 5774 |
| 720  | trichostatin A       | 100 nM | MCF7 | 0.497 | 0.109 | -0.12  | 4348 |
| 1053 | AH-23848             | 1 µM   | MCF7 | 0.496 | 0.079 | -0.15  | 6890 |
| 683  | Prestwick-1100       | 9 µM   | PC3  | 0.496 | 0.07  | -0.159 | 3798 |
| 1086 | CP-645525-01         | 10 µM  | MCF7 | 0.496 | 0.064 | -0.165 | 7515 |
| 729  | propofol             | 22 µM  | MCF7 | 0.496 | 0.099 | -0.13  | 5306 |
| 765  | rosiglitazone        | 10 µM  | MCF7 | 0.496 | 0.084 | -0.145 | 6992 |
| 720  | tinidazole           | 16 µM  | MCF7 | 0.496 | 0.09  | -0.139 | 4370 |
| 632  | sulpiride            | 12 µM  | MCF7 | 0.495 | 0.072 | -0.156 | 1467 |
| 686  | mepenzolate bromide  | 10 µM  | MCF7 | 0.494 | 0.084 | -0.145 | 3829 |
| 673  | paracetamol          | 26 µM  | MCF7 | 0.494 | 0.075 | -0.153 | 3364 |
| 729  | methylethylmethazine | 9 µM   | MCF7 | 0.494 | 0.069 | -0.159 | 5303 |
| 630  | bezafibrate          | 11 µM  | HL60 | 0.494 | 0.059 | -0.169 | 1275 |
| 611  | edrophonium chloride | 20 µM  | PC3  | 0.494 | 0.094 | -0.134 | 1936 |
| 686  | furaltadone          | 11 µM  | MCF7 | 0.494 | 0.081 | -0.148 | 3838 |
| 1054 | SB-203580            | 1 µM   | PC3  | 0.494 | 0.096 | -0.132 | 6894 |
| 506  | valproic acid        | 50 µM  | MCF7 | 0.493 | 0.076 | -0.152 | 1002 |
| 734  | atropine             | 6 µM   | PC3  | 0.493 | 0.053 | -0.175 | 5865 |
| 749  | trifluridine         | 14 µM  | HL60 | 0.493 | 0.066 | -0.162 | 6136 |
| 662  | monocrotaline        | 12 µM  | MCF7 | 0.493 | 0.07  | -0.157 | 2749 |
| 713  | equilin              | 15 µM  | PC3  | 0.493 | 0.055 | -0.172 | 4659 |
| 689  | tobramycin           | 9 µM   | PC3  | 0.492 | 0.068 | -0.159 | 4081 |



|      |                     |       |      |       |       |        |      |
|------|---------------------|-------|------|-------|-------|--------|------|
| 772  | esculetin           | 22 µM | MCF7 | 0.492 | 0.086 | -0.141 | 7459 |
| 647  | kanamycin           | 7 µM  | MCF7 | 0.49  | 0.048 | -0.178 | 3224 |
| 616  | pirenzepine         | 9 µM  | PC3  | 0.49  | 0.09  | -0.136 | 2071 |
| 1040 | PNU-0293363         | 10 µM | PC3  | 0.49  | 0.099 | -0.128 | 6568 |
| 701  | Prestwick-664       | 8 µM  | PC3  | 0.49  | 0.091 | -0.135 | 4275 |
| 678  | meropenem           | 10 µM | MCF7 | 0.49  | 0.085 | -0.141 | 3564 |
| 748  | convolamine         | 12 µM | MCF7 | 0.49  | 0.094 | -0.133 | 7230 |
| 680  | mephenesin          | 22 µM | PC3  | 0.49  | 0.062 | -0.164 | 3675 |
| 692  | pyrimethamine       | 16 µM | PC3  | 0.49  | 0.074 | -0.152 | 4194 |
| 645  | fludroxycortide     | 9 µM  | HL60 | 0.489 | 0.068 | -0.158 | 2184 |
| 712  | hymecromone         | 23 µM | PC3  | 0.489 | 0.084 | -0.142 | 4623 |
| 618  | proglumide          | 12 µM | HL60 | 0.489 | 0.076 | -0.149 | 2363 |
| 761  | hydroflumethiazide  | 12 µM | PC3  | 0.488 | 0.092 | -0.133 | 7259 |
| 610  | amylocaine          | 15 µM | PC3  | 0.488 | 0.069 | -0.157 | 1909 |
| 87   | butein              | 10 µM | PC3  | 0.488 | 0.065 | -0.16  | 582  |
| 701  | bromopride          | 12 µM | PC3  | 0.488 | 0.066 | -0.16  | 4278 |
| 709  | retrosine           | 11 µM | PC3  | 0.488 | 0.1   | -0.125 | 6601 |
| 734  | oxprenolol          | 13 µM | PC3  | 0.487 | 0.06  | -0.165 | 5871 |
| 719  | enilconazole        | 13 µM | PC3  | 0.487 | 0.092 | -0.133 | 5113 |
| 709  | lactobionic acid    | 11 µM | PC3  | 0.487 | 0.071 | -0.154 | 6605 |
| 615  | xylometazoline      | 14 µM | HL60 | 0.487 | 0.061 | -0.164 | 1423 |
| 642  | mexiletine          | 19 µM | MCF7 | 0.486 | 0.067 | -0.158 | 2324 |
| 619  | bupivacaine         | 12 µM | HL60 | 0.486 | 0.086 | -0.139 | 2404 |
| 743  | aconitine           | 6 µM  | MCF7 | 0.486 | 0.112 | -0.113 | 6797 |
| 56   | fasudil             | 10 µM | PC3  | 0.486 | 0.076 | -0.149 | 436  |
| 699  | halcinonide         | 9 µM  | MCF7 | 0.486 | 0.062 | -0.162 | 4703 |
| 637  | ethosuximide        | 28 µM | MCF7 | 0.486 | 0.054 | -0.17  | 2280 |
| 771  | disopyramide        | 12 µM | MCF7 | 0.486 | 0.052 | -0.173 | 7439 |
| 688  | fusaric acid        | 22 µM | PC3  | 0.485 | 0.103 | -0.121 | 3986 |
| 734  | pirenzepine         | 9 µM  | PC3  | 0.485 | 0.065 | -0.159 | 5872 |
| 758  | testosterone        | 12 µM | MCF7 | 0.485 | 0.053 | -0.171 | 5636 |
| 673  | capsaicin           | 13 µM | MCF7 | 0.485 | 0.076 | -0.147 | 3372 |
| 705  | alcuronium chloride | 5 µM  | MCF7 | 0.484 | 0.105 | -0.119 | 4409 |
| 671  | doxycycline         | 8 µM  | MCF7 | 0.484 | 0.087 | -0.136 | 3479 |
| 704  | etamsylate          | 15 µM | PC3  | 0.484 | 0.072 | -0.151 | 4576 |
| 710  | estrone             | 15 µM | PC3  | 0.484 | 0.078 | -0.145 | 6647 |
| 705  | tetramisole         | 17 µM | MCF7 | 0.484 | 0.073 | -0.151 | 4412 |

|      |                        |        |      |       |       |        |      |
|------|------------------------|--------|------|-------|-------|--------|------|
| 637  | ornidazole             | 18 µM  | MCF7 | 0.484 | 0.089 | -0.135 | 2272 |
| 644  | harmaline              | 14 µM  | HL60 | 0.484 | 0.089 | -0.134 | 2149 |
| 751  | eldeline               | 8 µM   | MCF7 | 0.483 | 0.084 | -0.139 | 6026 |
| 628  | carbamazepine          | 17 µM  | PC3  | 0.483 | 0.07  | -0.153 | 1805 |
| 677  | pivampicillin          | 9 µM   | MCF7 | 0.483 | 0.084 | -0.139 | 3506 |
| 1049 | STOCK1N-28457          | 20 µM  | MCF7 | 0.483 | 0.097 | -0.126 | 6869 |
| 676  | moxonidine             | 17 µM  | MCF7 | 0.483 | 0.08  | -0.143 | 7343 |
| 616  | gallamine triethiodide | 4 µM   | PC3  | 0.483 | 0.089 | -0.134 | 2059 |
| 748  | praziquantel           | 13 µM  | MCF7 | 0.483 | 0.081 | -0.141 | 7228 |
| 1080 | fulvestrant            | 1 µM   | MCF7 | 0.482 | 0.092 | -0.131 | 7490 |
| 655  | hydrocortisone         | 11 µM  | MCF7 | 0.482 | 0.065 | -0.158 | 3284 |
| 738  | carbamazepine          | 17 µM  | MCF7 | 0.482 | 0.088 | -0.135 | 5518 |
| 690  | rifampicin             | 5 µM   | MCF7 | 0.482 | 0.071 | -0.152 | 4126 |
| 691  | xylazine               | 18 µM  | MCF7 | 0.482 | 0.085 | -0.138 | 4147 |
| 754  | isradipine             | 11 µM  | PC3  | 0.481 | 0.057 | -0.165 | 6347 |
| 682  | deferoxamine           | 6 µM   | PC3  | 0.481 | 0.068 | -0.154 | 3760 |
| 730  | (-)-atenolol           | 15 µM  | MCF7 | 0.481 | 0.06  | -0.162 | 5325 |
| 734  | azaperone              | 12 µM  | PC3  | 0.481 | 0.116 | -0.106 | 5877 |
| 736  | tubocurarine chloride  | 5 µM   | MCF7 | 0.48  | 0.108 | -0.114 | 5449 |
| 752  | nadide                 | 6 µM   | MCF7 | 0.48  | 0.099 | -0.123 | 6091 |
| 713  | cotinine               | 23 µM  | PC3  | 0.48  | 0.056 | -0.166 | 4650 |
| 676  | pronetalol             | 15 µM  | MCF7 | 0.479 | 0.093 | -0.128 | 7322 |
| 651  | pridinol               | 10 µM  | HL60 | 0.479 | 0.11  | -0.111 | 2715 |
| 725  | estradiol              | 100 nM | MCF7 | 0.478 | 0.098 | -0.123 | 5205 |
| 736  | nabumetone             | 18 µM  | MCF7 | 0.478 | 0.118 | -0.103 | 5428 |
| 736  | isradipine             | 11 µM  | MCF7 | 0.477 | 0.076 | -0.145 | 5447 |
| 687  | trichostatin A         | 100 nM | MCF7 | 0.477 | 0.095 | -0.125 | 3872 |
| 44   | tetraethylenepentamine | 100 µM | HL60 | 0.477 | 0.067 | -0.153 | 412  |
| 752  | cefalotin              | 10 µM  | MCF7 | 0.476 | 0.059 | -0.161 | 6079 |
| 704  | levodopa               | 20 µM  | PC3  | 0.476 | 0.072 | -0.148 | 4571 |
| 732  | azlocillin             | 8 µM   | PC3  | 0.476 | 0.079 | -0.14  | 5788 |
| 712  | procainamide           | 15 µM  | PC3  | 0.475 | 0.059 | -0.161 | 4602 |
| 693  | buflomedil             | 12 µM  | PC3  | 0.475 | 0.061 | -0.158 | 4258 |
| 618  | nefopam                | 14 µM  | HL60 | 0.475 | 0.076 | -0.143 | 2355 |
| 20   | clofibrate             | 150 µM | MCF7 | 0.475 | 0.065 | -0.154 | 263  |
| 670  | mephentermine          | 9 µM   | MCF7 | 0.475 | 0.054 | -0.165 | 3425 |
| 686  | eldeline               | 8 µM   | MCF7 | 0.475 | 0.103 | -0.117 | 3831 |

|      |                         |       |      |       |       |        |      |
|------|-------------------------|-------|------|-------|-------|--------|------|
| 680  | trimethoprim            | 14 µM | PC3  | 0.474 | 0.092 | -0.127 | 3678 |
| 725  | tretinoin               | 1 µM  | MCF7 | 0.474 | 0.064 | -0.155 | 5208 |
| 622  | chlortalidone           | 12 µM | HL60 | 0.474 | 0.035 | -0.184 | 1581 |
| 1025 | 3-nitropropionic acid   | 10 µM | PC3  | 0.474 | 0.081 | -0.138 | 6407 |
| 640  | bromperidol             | 10 µM | HL60 | 0.474 | 0.081 | -0.137 | 1723 |
| 691  | sotalol                 | 13 µM | MCF7 | 0.474 | 0.066 | -0.153 | 4160 |
| 731  | butacaine               | 13 µM | PC3  | 0.474 | 0.092 | -0.126 | 5748 |
| 687  | nialamide               | 13 µM | MCF7 | 0.473 | 0.097 | -0.121 | 3871 |
| 637  | levamisole              | 17 µM | MCF7 | 0.473 | 0.115 | -0.104 | 2257 |
| 678  | azaperone               | 12 µM | MCF7 | 0.472 | 0.097 | -0.121 | 3573 |
| 504  | 5248896                 | 11 µM | MCF7 | 0.472 | 0.063 | -0.155 | 838  |
| 694  | mestranol               | 13 µM | MCF7 | 0.472 | 0.031 | -0.187 | 4792 |
| 653  | 3-hydroxy-DL-kynurenine | 18 µM | MCF7 | 0.472 | 0.082 | -0.135 | 2654 |
| 753  | coralyne                | 10 µM | PC3  | 0.471 | 0.101 | -0.117 | 6317 |
| 635  | atovaquone              | 11 µM | HL60 | 0.47  | 0.069 | -0.148 | 2480 |
| 637  | methocarbamol           | 17 µM | MCF7 | 0.47  | 0.093 | -0.125 | 2274 |
| 748  | atropine                | 6 µM  | MCF7 | 0.47  | 0.063 | -0.154 | 7219 |
| 630  | coralyne                | 10 µM | HL60 | 0.469 | 0.064 | -0.153 | 1298 |
| 700  | heliotrine              | 13 µM | MCF7 | 0.469 | 0.071 | -0.146 | 4739 |
| 681  | flumetasone             | 10 µM | PC3  | 0.469 | 0.076 | -0.14  | 3712 |
| 1016 | PF-01378883-00          | 10 µM | MCF7 | 0.469 | 0.105 | -0.112 | 6363 |
| 734  | delsoline               | 9 µM  | PC3  | 0.469 | 0.054 | -0.162 | 5858 |
| 39   | celecoxib               | 10 µM | MCF7 | 0.469 | 0.117 | -0.099 | 377  |
| 708  | chlormezanone           | 15 µM | MCF7 | 0.468 | 0.124 | -0.092 | 5697 |
| 615  | aztreonam               | 9 µM  | HL60 | 0.468 | 0.05  | -0.167 | 1435 |
| 630  | naftidrofuryl           | 8 µM  | HL60 | 0.468 | 0.044 | -0.172 | 1267 |
| 1080 | CP-319743               | 10 µM | MCF7 | 0.468 | 0.084 | -0.132 | 7486 |
| 710  | brinzolamide            | 10 µM | PC3  | 0.468 | 0.061 | -0.155 | 6670 |
| 686  | citolone                | 25 µM | MCF7 | 0.468 | 0.104 | -0.112 | 3836 |
| 651  | cefapirin               | 9 µM  | HL60 | 0.467 | 0.078 | -0.138 | 2730 |
| 683  | thiamazole              | 35 µM | PC3  | 0.467 | 0.114 | -0.102 | 3815 |
| 734  | vinpocetine             | 11 µM | PC3  | 0.467 | 0.047 | -0.169 | 5859 |
| 612  | dicycloverine           | 12 µM | HL60 | 0.467 | 0.093 | -0.122 | 1983 |
| 96   | arachidonic acid        | 10 µM | MCF7 | 0.466 | 0.101 | -0.114 | 604  |
| 672  | paromomycin             | 6 µM  | MCF7 | 0.466 | 0.097 | -0.119 | 3356 |
| 682  | 0317956-0000            | 1 µM  | PC3  | 0.466 | 0.084 | -0.131 | 3777 |
| 733  | tomatidine              | 10 µM | PC3  | 0.466 | 0.096 | -0.119 | 5808 |

|      |                           |        |      |       |       |        |      |
|------|---------------------------|--------|------|-------|-------|--------|------|
| 689  | decamethonium bromide     | 10 µM  | PC3  | 0.466 | 0.081 | -0.134 | 4094 |
| 688  | troleandomycin            | 5 µM   | PC3  | 0.465 | 0.096 | -0.119 | 3985 |
| 701  | ketoprofen                | 16 µM  | PC3  | 0.465 | 0.049 | -0.166 | 4286 |
| 714  | felodipine                | 10 µM  | PC3  | 0.465 | 0.069 | -0.146 | 6695 |
| 615  | gemfibrozil               | 16 µM  | HL60 | 0.464 | 0.044 | -0.17  | 1430 |
| 692  | scopolamine               | 12 µM  | PC3  | 0.464 | 0.067 | -0.148 | 4219 |
| 619  | aminoglutethimide         | 17 µM  | HL60 | 0.464 | 0.055 | -0.16  | 2390 |
| 683  | diethylstilbestrol        | 15 µM  | PC3  | 0.464 | 0.067 | -0.147 | 3812 |
| 710  | bezafibrate               | 11 µM  | PC3  | 0.463 | 0.071 | -0.143 | 6653 |
| 734  | convolamine               | 12 µM  | PC3  | 0.463 | 0.091 | -0.123 | 5876 |
| 715  | rolipram                  | 15 µM  | PC3  | 0.463 | 0.122 | -0.092 | 6730 |
| 703  | trichostatin A            | 100 nM | PC3  | 0.463 | 0.063 | -0.151 | 4526 |
| 96   | nifedipine                | 10 µM  | MCF7 | 0.463 | 0.082 | -0.132 | 603  |
| 1049 | SC-560                    | 10 µM  | MCF7 | 0.463 | 0.111 | -0.103 | 6870 |
| 686  | sulfadimidine             | 13 µM  | MCF7 | 0.462 | 0.095 | -0.119 | 3847 |
| 672  | fosfosal                  | 18 µM  | MCF7 | 0.462 | 0.075 | -0.138 | 3336 |
| 610  | sulpiride                 | 12 µM  | PC3  | 0.462 | 0.094 | -0.119 | 1887 |
| 664  | harpagoside               | 8 µM   | HL60 | 0.462 | 0.052 | -0.162 | 2935 |
| 686  | fluocinonide              | 8 µM   | MCF7 | 0.462 | 0.069 | -0.144 | 3839 |
| 656  | orciprenaline             | 8 µM   | MCF7 | 0.461 | 0.096 | -0.117 | 2845 |
| 771  | aminoglutethimide         | 17 µM  | MCF7 | 0.46  | 0.075 | -0.138 | 7421 |
| 756  | adrenosterone             | 13 µM  | MCF7 | 0.46  | 0.077 | -0.136 | 6486 |
| 670  | piperacillin              | 7 µM   | MCF7 | 0.46  | 0.045 | -0.167 | 3420 |
| 505  | 5152487                   | 10 µM  | MCF7 | 0.459 | 0.074 | -0.138 | 896  |
| 646  | guanethidine              | 13 µM  | MCF7 | 0.459 | 0.061 | -0.151 | 3171 |
| 1024 | PF-01378883-00            | 10 µM  | MCF7 | 0.459 | 0.081 | -0.131 | 6405 |
| 728  | cyproterone               | 10 µM  | PC3  | 0.459 | 0.042 | -0.17  | 4470 |
| 711  | bendroflumethiazide       | 9 µM   | MCF7 | 0.459 | 0.07  | -0.141 | 3934 |
| 678  | natamycin                 | 6 µM   | MCF7 | 0.459 | 0.104 | -0.108 | 3548 |
| 709  | dl-alpha tocopherol       | 9 µM   | PC3  | 0.459 | 0.076 | -0.135 | 6616 |
| 615  | tiratricol                | 6 µM   | HL60 | 0.458 | 0.048 | -0.164 | 1412 |
| 622  | benzydamine               | 12 µM  | HL60 | 0.458 | 0.092 | -0.119 | 1552 |
| 734  | noscapine                 | 10 µM  | PC3  | 0.458 | 0.058 | -0.154 | 5851 |
| 678  | methantheinium bromide    | 10 µM  | MCF7 | 0.458 | 0.088 | -0.124 | 3560 |
| 757  | fulvestrant               | 10 nM  | MCF7 | 0.458 | 0.054 | -0.157 | 5598 |
| 747  | piperacetazine            | 10 µM  | MCF7 | 0.458 | 0.043 | -0.169 | 7191 |
| 692  | trimethylcolchicinic acid | 12 µM  | PC3  | 0.457 | 0.098 | -0.113 | 4202 |

|      |                             |        |      |       |       |        |      |
|------|-----------------------------|--------|------|-------|-------|--------|------|
| 1022 | F0447-0125                  | 10 µM  | MCF7 | 0.457 | 0.048 | -0.163 | 6396 |
| 692  | conessine                   | 11 µM  | PC3  | 0.457 | 0.088 | -0.123 | 4191 |
| 732  | dorzolamide                 | 11 µM  | PC3  | 0.457 | 0.086 | -0.125 | 5785 |
| 698  | glycopyrronium bromide      | 10 µM  | PC3  | 0.457 | 0.088 | -0.123 | 7386 |
| 637  | tiratricol                  | 6 µM   | MCF7 | 0.456 | 0.105 | -0.106 | 2259 |
| 743  | sulfapyridine               | 16 µM  | MCF7 | 0.456 | 0.063 | -0.147 | 6799 |
| 602  | haloperidol                 | 10 µM  | HL60 | 0.456 | 0.061 | -0.15  | 1144 |
| 747  | cinchonidine                | 14 µM  | MCF7 | 0.455 | 0.053 | -0.157 | 7190 |
| 25   | acetylsalicylic acid        | 100 µM | MCF7 | 0.455 | 0.058 | -0.153 | 315  |
| 755  | idazoxan                    | 17 µM  | MCF7 | 0.455 | 0.066 | -0.144 | 6465 |
| 683  | ciclacillin                 | 12 µM  | PC3  | 0.455 | 0.059 | -0.151 | 3800 |
| 613  | ampicillin                  | 10 µM  | HL60 | 0.455 | 0.078 | -0.132 | 2030 |
| 737  | denatonium benzoate         | 9 µM   | MCF7 | 0.454 | 0.084 | -0.125 | 5480 |
| 692  | meptazinol                  | 15 µM  | PC3  | 0.454 | 0.108 | -0.101 | 4188 |
| 731  | meprylcaine                 | 15 µM  | PC3  | 0.454 | 0.071 | -0.139 | 5723 |
| 651  | proadifen                   | 10 µM  | HL60 | 0.453 | 0.047 | -0.162 | 2707 |
| 741  | epirizole                   | 17 µM  | MCF7 | 0.453 | 0.064 | -0.145 | 5995 |
| 753  | nitrendipine                | 11 µM  | PC3  | 0.452 | 0.066 | -0.143 | 6304 |
| 751  | bromopride                  | 12 µM  | MCF7 | 0.452 | 0.086 | -0.123 | 6037 |
| 695  | 7-aminocephalosporanic acid | 15 µM  | MCF7 | 0.452 | 0.078 | -0.131 | 4826 |
| 650  | valproic acid               | 50 µM  | HL60 | 0.451 | 0.058 | -0.15  | 2682 |
| 644  | protoveratrine A            | 5 µM   | HL60 | 0.451 | 0.085 | -0.123 | 2144 |
| 708  | capsaicin                   | 13 µM  | MCF7 | 0.451 | 0.095 | -0.114 | 5673 |
| 749  | chloropyrazine              | 35 µM  | HL60 | 0.451 | 0.109 | -0.1   | 6148 |
| 657  | harmalol                    | 15 µM  | MCF7 | 0.451 | 0.098 | -0.11  | 2892 |
| 687  | levcycloserine              | 39 µM  | MCF7 | 0.45  | 0.093 | -0.116 | 3870 |
| 615  | thalidomide                 | 15 µM  | HL60 | 0.45  | 0.047 | -0.161 | 1411 |
| 752  | streptozocin                | 15 µM  | MCF7 | 0.45  | 0.061 | -0.147 | 6098 |
| 682  | mepenzolate bromide         | 10 µM  | PC3  | 0.449 | 0.056 | -0.152 | 3748 |
| 726  | serotonin                   | 19 µM  | MCF7 | 0.449 | 0.047 | -0.161 | 5268 |
| 764  | isopropamide iodide         | 8 µM   | PC3  | 0.448 | 0.072 | -0.136 | 7133 |
| 743  | chlorphenamine              | 10 µM  | MCF7 | 0.448 | 0.087 | -0.12  | 6773 |
| 640  | iobenguane                  | 11 µM  | HL60 | 0.447 | 0.041 | -0.166 | 1729 |
| 689  | cefadroxil                  | 11 µM  | PC3  | 0.446 | 0.063 | -0.143 | 4080 |
| 673  | 2-aminobenzenesulfonamide   | 23 µM  | MCF7 | 0.446 | 0.085 | -0.121 | 3400 |
| 732  | methacholine chloride       | 20 µM  | PC3  | 0.446 | 0.105 | -0.101 | 5773 |
| 615  | fenspiride                  | 13 µM  | HL60 | 0.446 | 0.057 | -0.148 | 1422 |

|     |                |        |      |       |       |        |      |
|-----|----------------|--------|------|-------|-------|--------|------|
| 714 | diclofenamide  | 13 µM  | PC3  | 0.445 | 0.076 | -0.13  | 6686 |
| 748 | cefmetazole    | 8 µM   | MCF7 | 0.445 | 0.073 | -0.133 | 7222 |
| 615 | norfloxacin    | 13 µM  | HL60 | 0.444 | 0.064 | -0.142 | 1406 |
| 613 | hesperetin     | 13 µM  | HL60 | 0.444 | 0.048 | -0.157 | 2031 |
| 714 | apomorphine    | 6 µM   | PC3  | 0.444 | 0.056 | -0.15  | 6683 |
| 705 | novobiocin     | 6 µM   | MCF7 | 0.444 | 0.095 | -0.111 | 4392 |
| 20  | indometacin    | 20 µM  | MCF7 | 0.444 | 0.095 | -0.111 | 262  |
| 62  | indometacin    | 100 µM | MCF7 | 0.444 | 0.069 | -0.136 | 453  |
| 747 | clindamycin    | 9 µM   | MCF7 | 0.444 | 0.088 | -0.117 | 7172 |
| 628 | procaine       | 15 µM  | PC3  | 0.443 | 0.058 | -0.147 | 1796 |
| 614 | isoconazole    | 10 µM  | HL60 | 0.443 | 0.077 | -0.127 | 1372 |
| 754 | flavoxate      | 9 µM   | PC3  | 0.441 | 0.073 | -0.131 | 6326 |
| 741 | fenspiride     | 13 µM  | MCF7 | 0.441 | 0.064 | -0.14  | 6001 |
| 766 | mesoridazine   | 7 µM   | MCF7 | 0.441 | 0.076 | -0.128 | 7017 |
| 651 | cefoxitin      | 9 µM   | HL60 | 0.44  | 0.1   | -0.103 | 2735 |
| 718 | metformin      | 24 µM  | PC3  | 0.44  | 0.088 | -0.115 | 5068 |
| 631 | cefadroxil     | 11 µM  | HL60 | 0.44  | 0.049 | -0.154 | 1323 |
| 40  | tretinoin      | 1 µM   | MCF7 | 0.439 | 0.077 | -0.126 | 384  |
| 755 | lorglumide     | 8 µM   | MCF7 | 0.439 | 0.048 | -0.154 | 6456 |
| 647 | clenbuterol    | 13 µM  | MCF7 | 0.439 | 0.083 | -0.119 | 3228 |
| 673 | dimethadione   | 31 µM  | MCF7 | 0.439 | 0.061 | -0.142 | 3367 |
| 676 | apramycin      | 7 µM   | MCF7 | 0.438 | 0.069 | -0.133 | 7334 |
| 654 | carisoprodol   | 15 µM  | MCF7 | 0.437 | 0.074 | -0.128 | 3251 |
| 637 | gemfibrozil    | 16 µM  | MCF7 | 0.437 | 0.07  | -0.132 | 2277 |
| 737 | Prestwick-920  | 14 µM  | MCF7 | 0.437 | 0.078 | -0.124 | 5475 |
| 611 | baclofen       | 19 µM  | PC3  | 0.437 | 0.059 | -0.143 | 1952 |
| 644 | cinchonine     | 14 µM  | HL60 | 0.436 | 0.082 | -0.12  | 2133 |
| 603 | chlorpromazine | 1 µM   | PC3  | 0.436 | 0.05  | -0.152 | 1217 |
| 743 | mebeverine     | 9 µM   | MCF7 | 0.436 | 0.065 | -0.136 | 6795 |
| 690 | pronetalol     | 15 µM  | MCF7 | 0.436 | 0.099 | -0.102 | 4104 |
| 630 | tacrine        | 16 µM  | HL60 | 0.436 | 0.061 | -0.14  | 1278 |
| 737 | homatropine    | 11 µM  | MCF7 | 0.436 | 0.071 | -0.131 | 5477 |
| 712 | dimethadione   | 31 µM  | PC3  | 0.436 | 0.045 | -0.156 | 4607 |
| 683 | oxaprozin      | 14 µM  | PC3  | 0.435 | 0.06  | -0.141 | 3794 |
| 657 | raubasine      | 10 µM  | MCF7 | 0.435 | 0.084 | -0.117 | 2898 |
| 680 | dilazep        | 6 µM   | PC3  | 0.435 | 0.049 | -0.152 | 3665 |
| 610 | oxetacaine     | 9 µM   | PC3  | 0.435 | 0.055 | -0.145 | 1903 |

|      |                           |        |      |       |       |        |      |
|------|---------------------------|--------|------|-------|-------|--------|------|
| 682  | piperacillin              | 7 µM   | PC3  | 0.434 | 0.081 | -0.12  | 3763 |
| 709  | carisoprodol              | 15 µM  | PC3  | 0.434 | 0.072 | -0.129 | 6610 |
| 762  | netilmicin                | 3 µM   | PC3  | 0.434 | 0.057 | -0.143 | 7302 |
| 693  | procyclidine              | 12 µM  | PC3  | 0.433 | 0.041 | -0.159 | 4233 |
| 635  | nifuroxazide              | 15 µM  | HL60 | 0.433 | 0.067 | -0.133 | 2490 |
| 737  | niflumic acid             | 14 µM  | MCF7 | 0.432 | 0.085 | -0.115 | 5490 |
| 738  | todralazine               | 15 µM  | MCF7 | 0.432 | 0.093 | -0.106 | 5512 |
| 1078 | 6-bromoindirubin-3'-oxime | 500 nM | MCF7 | 0.431 | 0.071 | -0.128 | 7101 |
| 651  | sulfanilamide             | 23 µM  | HL60 | 0.43  | 0.039 | -0.16  | 2709 |
| 698  | PNU-0251126               | 1 µM   | PC3  | 0.43  | 0.073 | -0.126 | 7390 |
| 735  | chlorpropamide            | 14 µM  | MCF7 | 0.43  | 0.052 | -0.146 | 5391 |
| 616  | neomycin                  | 4 µM   | PC3  | 0.43  | 0.054 | -0.145 | 2066 |
| 709  | glimepiride               | 8 µM   | PC3  | 0.43  | 0.069 | -0.13  | 6628 |
| 733  | proadifen                 | 10 µM  | PC3  | 0.429 | 0.067 | -0.131 | 5807 |
| 704  | sparteine                 | 17 µM  | PC3  | 0.429 | 0.078 | -0.12  | 4568 |
| 737  | diprophylline             | 16 µM  | MCF7 | 0.429 | 0.075 | -0.123 | 5482 |
| 734  | nadide                    | 6 µM   | PC3  | 0.429 | 0.08  | -0.119 | 5873 |
| 715  | hesperetin                | 13 µM  | PC3  | 0.429 | 0.045 | -0.153 | 6750 |
| 712  | N-acetyl-L-leucine        | 23 µM  | PC3  | 0.428 | 0.056 | -0.141 | 4622 |
| 735  | aminohippuric acid        | 21 µM  | MCF7 | 0.428 | 0.076 | -0.122 | 5394 |
| 751  | benzamil                  | 11 µM  | MCF7 | 0.428 | 0.065 | -0.133 | 6056 |
| 1057 | AH-23848                  | 1 µM   | MCF7 | 0.427 | 0.044 | -0.154 | 6903 |
| 654  | carcinine                 | 22 µM  | MCF7 | 0.427 | 0.074 | -0.124 | 3242 |
| 642  | ofloxacin                 | 11 µM  | MCF7 | 0.427 | 0.063 | -0.135 | 2302 |
| 698  | salbutamol                | 17 µM  | PC3  | 0.427 | 0.071 | -0.126 | 7376 |
| 1048 | PF-00562151-00            | 10 µM  | PC3  | 0.427 | 0.08  | -0.117 | 6863 |
| 747  | ticarcillin               | 9 µM   | MCF7 | 0.426 | 0.069 | -0.128 | 7185 |
| 731  | amodiaquine               | 9 µM   | PC3  | 0.426 | 0.072 | -0.124 | 5747 |
| 677  | ioxaglic acid             | 3 µM   | MCF7 | 0.425 | 0.078 | -0.118 | 3528 |
| 727  | alpha-estradiol           | 10 nM  | PC3  | 0.425 | 0.056 | -0.141 | 4434 |
| 737  | perhexiline               | 10 µM  | MCF7 | 0.425 | 0.09  | -0.106 | 5501 |
| 705  | harman                    | 18 µM  | MCF7 | 0.425 | 0.048 | -0.148 | 4408 |
| 728  | pipenzolate bromide       | 9 µM   | PC3  | 0.424 | 0.081 | -0.115 | 4484 |
| 610  | prednisone                | 11 µM  | PC3  | 0.424 | 0.062 | -0.134 | 1897 |
| 647  | hemicholinium             | 7 µM   | MCF7 | 0.424 | 0.06  | -0.136 | 3216 |
| 736  | acemetacin                | 10 µM  | MCF7 | 0.424 | 0.07  | -0.126 | 5460 |
| 738  | hyoscyamine               | 14 µM  | MCF7 | 0.424 | 0.094 | -0.102 | 5524 |

|      |                      |       |      |       |       |        |      |
|------|----------------------|-------|------|-------|-------|--------|------|
| 703  | chlorambucil         | 13 µM | PC3  | 0.424 | 0.098 | -0.098 | 4523 |
| 640  | 10-methoxyharmalan   | 19 µM | HL60 | 0.424 | 0.058 | -0.138 | 1743 |
| 677  | loracarbef           | 11 µM | MCF7 | 0.424 | 0.06  | -0.136 | 3532 |
| 753  | pralidoxime          | 23 µM | PC3  | 0.424 | 0.06  | -0.136 | 6283 |
| 645  | sulfachlorpyridazine | 14 µM | HL60 | 0.423 | 0.067 | -0.129 | 2191 |
| 730  | oxantel              | 7 µM  | MCF7 | 0.423 | 0.067 | -0.129 | 5338 |
| 753  | terguride            | 12 µM | PC3  | 0.423 | 0.058 | -0.137 | 6299 |
| 627  | diprophylline        | 16 µM | MCF7 | 0.422 | 0.069 | -0.126 | 1689 |
| 756  | halofantrine         | 7 µM  | MCF7 | 0.422 | 0.055 | -0.14  | 6509 |
| 642  | nefopam              | 14 µM | MCF7 | 0.421 | 0.084 | -0.111 | 2317 |
| 715  | pilocarpine          | 15 µM | PC3  | 0.421 | 0.095 | -0.099 | 6741 |
| 1086 | IC-86621             | 1 µM  | MCF7 | 0.421 | 0.078 | -0.117 | 7513 |
| 714  | hydrocortisone       | 11 µM | PC3  | 0.421 | 0.086 | -0.108 | 6684 |
| 613  | famotidine           | 12 µM | HL60 | 0.419 | 0.044 | -0.15  | 2029 |
| 755  | terguride            | 9 µM  | MCF7 | 0.418 | 0.072 | -0.122 | 6473 |
| 678  | ondansetron          | 12 µM | MCF7 | 0.418 | 0.079 | -0.114 | 3575 |
| 688  | pheniramine          | 11 µM | PC3  | 0.418 | 0.067 | -0.126 | 4012 |
| 514  | (-)-catechin         | 11 µM | MCF7 | 0.418 | 0.058 | -0.135 | 1101 |
| 649  | furaltadone          | 11 µM | HL60 | 0.417 | 0.087 | -0.106 | 2554 |
| 504  | 5279552              | 22 µM | MCF7 | 0.417 | 0.058 | -0.134 | 843  |
| 764  | antazoline           | 13 µM | PC3  | 0.417 | 0.078 | -0.115 | 7128 |
| 698  | kawain               | 17 µM | PC3  | 0.416 | 0.067 | -0.126 | 7369 |
| 614  | picotamide           | 10 µM | HL60 | 0.416 | 0.061 | -0.131 | 1387 |
| 637  | etodolac             | 14 µM | MCF7 | 0.416 | 0.074 | -0.119 | 2254 |
| 689  | sotalol              | 13 µM | PC3  | 0.416 | 0.047 | -0.145 | 4079 |
| 715  | carbachol            | 22 µM | PC3  | 0.416 | 0.089 | -0.103 | 6742 |
| 738  | sulindac             | 11 µM | MCF7 | 0.416 | 0.072 | -0.12  | 5528 |
| 683  | guaifenesin          | 20 µM | PC3  | 0.416 | 0.074 | -0.118 | 3814 |
| 735  | terguride            | 12 µM | MCF7 | 0.415 | 0.082 | -0.109 | 5400 |
| 714  | fluvastatin          | 9 µM  | PC3  | 0.415 | 0.076 | -0.116 | 6691 |
| 615  | nimesulide           | 13 µM | HL60 | 0.415 | 0.058 | -0.134 | 1428 |
| 610  | niclosamide          | 12 µM | PC3  | 0.414 | 0.053 | -0.138 | 1916 |
| 615  | meclofenamic acid    | 12 µM | HL60 | 0.413 | 0.042 | -0.149 | 1445 |
| 736  | molsidomine          | 17 µM | MCF7 | 0.413 | 0.074 | -0.117 | 5426 |
| 648  | sulfaquinoxaline     | 12 µM | HL60 | 0.413 | 0.102 | -0.089 | 2528 |
| 671  | cefoxitin            | 9 µM  | MCF7 | 0.413 | 0.057 | -0.134 | 3477 |
| 755  | flurbiprofen         | 16 µM | MCF7 | 0.413 | 0.067 | -0.124 | 6472 |



|     |                        |        |      |       |       |        |      |
|-----|------------------------|--------|------|-------|-------|--------|------|
| 640 | trimetazidine          | 12 µM  | HL60 | 0.413 | 0.06  | -0.131 | 1727 |
| 686 | bendroflumethiazide    | 9 µM   | MCF7 | 0.412 | 0.059 | -0.132 | 3840 |
| 755 | nimodipine             | 10 µM  | MCF7 | 0.412 | 0.055 | -0.135 | 6480 |
| 758 | 3-acetylcoumarin       | 21 µM  | MCF7 | 0.412 | 0.088 | -0.102 | 5624 |
| 619 | difenidol              | 12 µM  | HL60 | 0.412 | 0.065 | -0.125 | 2374 |
| 683 | 2,6-dimethylpiperidine | 27 µM  | PC3  | 0.412 | 0.085 | -0.105 | 3806 |
| 647 | desipramine            | 13 µM  | MCF7 | 0.412 | 0.078 | -0.112 | 3212 |
| 119 | alpha-estradiol        | 10 nM  | MCF7 | 0.411 | 0.039 | -0.151 | 762  |
| 613 | erythromycin           | 5 µM   | HL60 | 0.411 | 0.047 | -0.143 | 2010 |
| 709 | naphazoline            | 16 µM  | PC3  | 0.411 | 0.1   | -0.09  | 6604 |
| 744 | zomepirac              | 13 µM  | MCF7 | 0.411 | 0.077 | -0.112 | 6815 |
| 693 | carcinine              | 22 µM  | PC3  | 0.41  | 0.07  | -0.12  | 4225 |
| 661 | enilconazole           | 13 µM  | HL60 | 0.41  | 0.048 | -0.142 | 3139 |
| 617 | pentetrazol            | 29 µM  | PC3  | 0.41  | 0.041 | -0.148 | 2092 |
| 731 | fluorouracine          | 12 µM  | PC3  | 0.409 | 0.098 | -0.091 | 5741 |
| 765 | estradiol              | 100 nM | MCF7 | 0.409 | 0.053 | -0.136 | 6968 |
| 733 | Prestwick-689          | 10 µM  | PC3  | 0.409 | 0.061 | -0.128 | 5816 |
| 706 | fursultiamine          | 9 µM   | MCF7 | 0.408 | 0.063 | -0.125 | 4975 |
| 719 | bupivacaine            | 12 µM  | PC3  | 0.408 | 0.056 | -0.132 | 5112 |
| 615 | metampicillin          | 10 µM  | HL60 | 0.407 | 0.059 | -0.129 | 1440 |
| 682 | sulfachlorpyridazine   | 14 µM  | PC3  | 0.407 | 0.049 | -0.139 | 3769 |
| 614 | gallamine triethiodide | 4 µM   | HL60 | 0.407 | 0.039 | -0.15  | 1375 |
| 727 | chlorpromazine         | 1 µM   | PC3  | 0.407 | 0.065 | -0.123 | 4441 |
| 715 | benfluorex             | 10 µM  | PC3  | 0.407 | 0.086 | -0.102 | 6727 |
| 612 | ticlopidine            | 13 µM  | HL60 | 0.406 | 0.062 | -0.125 | 1975 |
| 611 | amoxapine              | 13 µM  | PC3  | 0.406 | 0.038 | -0.149 | 1931 |
| 632 | oxybuprocaine          | 12 µM  | MCF7 | 0.406 | 0.049 | -0.139 | 1476 |
| 761 | moxisylyte             | 13 µM  | PC3  | 0.406 | 0.063 | -0.124 | 7255 |
| 715 | oxantel                | 7 µM   | PC3  | 0.405 | 0.086 | -0.101 | 6738 |
| 754 | pinacidil              | 16 µM  | PC3  | 0.405 | 0.066 | -0.122 | 6356 |
| 694 | isoxsuprine            | 12 µM  | MCF7 | 0.405 | 0.075 | -0.112 | 4789 |
| 649 | bendroflumethiazide    | 9 µM   | HL60 | 0.405 | 0.059 | -0.128 | 2555 |
| 94  | 3-aminobenzamide       | 10 mM  | MCF7 | 0.405 | 0.064 | -0.123 | 590  |
| 618 | indapamide             | 11 µM  | HL60 | 0.404 | 0.064 | -0.123 | 2361 |
| 704 | harman                 | 18 µM  | PC3  | 0.403 | 0.069 | -0.117 | 4584 |
| 112 | tioguanine             | 10 µM  | MCF7 | 0.403 | 0.051 | -0.135 | 642  |
| 689 | levothyroxine sodium   | 5 µM   | PC3  | 0.402 | 0.099 | -0.087 | 4069 |

|      |                                |        |      |       |       |        |      |
|------|--------------------------------|--------|------|-------|-------|--------|------|
| 619  | flavoxate                      | 9 µM   | HL60 | 0.402 | 0.058 | -0.128 | 2373 |
| 610  | pheniramine                    | 11 µM  | PC3  | 0.401 | 0.05  | -0.135 | 1910 |
| 644  | canavanine                     | 14 µM  | HL60 | 0.4   | 0.046 | -0.139 | 2141 |
| 686  | metamizole sodium              | 12 µM  | MCF7 | 0.4   | 0.077 | -0.108 | 3835 |
| 687  | guaifenesin                    | 20 µM  | MCF7 | 0.4   | 0.079 | -0.105 | 3897 |
| 37   | troglitazone                   | 10 µM  | HL60 | 0.4   | 0.065 | -0.12  | 370  |
| 761  | mesoridazine                   | 7 µM   | PC3  | 0.399 | 0.069 | -0.115 | 7256 |
| 651  | iopamidol                      | 5 µM   | HL60 | 0.398 | 0.065 | -0.119 | 2732 |
| 734  | quipazine                      | 9 µM   | PC3  | 0.398 | 0.085 | -0.099 | 5887 |
| 677  | lymecycline                    | 7 µM   | MCF7 | 0.397 | 0.047 | -0.136 | 3514 |
| 683  | orphenadrine                   | 13 µM  | PC3  | 0.396 | 0.058 | -0.125 | 3801 |
| 36   | pirinixic acid                 | 100 µM | MCF7 | 0.396 | 0.103 | -0.08  | 368  |
| 682  | ethoxyquin                     | 18 µM  | PC3  | 0.395 | 0.049 | -0.133 | 3764 |
| 610  | trimethobenzamide              | 9 µM   | PC3  | 0.395 | 0.066 | -0.116 | 1920 |
| 714  | ciprofloxacin                  | 11 µM  | PC3  | 0.395 | 0.089 | -0.094 | 6700 |
| 715  | ceforanide                     | 8 µM   | PC3  | 0.395 | 0.075 | -0.107 | 6751 |
| 636  | cefotaxime                     | 8 µM   | MCF7 | 0.395 | 0.049 | -0.134 | 2235 |
| 693  | fosfosal                       | 18 µM  | PC3  | 0.395 | 0.047 | -0.136 | 4239 |
| 670  | thiamazole                     | 35 µM  | MCF7 | 0.394 | 0.069 | -0.113 | 3432 |
| 646  | clonidine                      | 15 µM  | MCF7 | 0.394 | 0.073 | -0.109 | 3172 |
| 677  | phensuximide                   | 21 µM  | MCF7 | 0.393 | 0.057 | -0.124 | 3521 |
| 54   | chlorpromazine                 | 1 µM   | MCF7 | 0.392 | 0.07  | -0.112 | 426  |
| 603  | tretinoin                      | 1 µM   | PC3  | 0.392 | 0.066 | -0.115 | 1211 |
| 680  | PNU-0251126                    | 1 µM   | PC3  | 0.392 | 0.07  | -0.112 | 3692 |
| 692  | tolnaftate                     | 13 µM  | PC3  | 0.392 | 0.071 | -0.11  | 4221 |
| 615  | mefexamide                     | 13 µM  | HL60 | 0.392 | 0.05  | -0.132 | 1438 |
| 692  | spectinomycin                  | 10 µM  | PC3  | 0.392 | 0.086 | -0.095 | 4187 |
| 1034 | AG-028671                      | 10 µM  | PC3  | 0.391 | 0.066 | -0.115 | 6557 |
| 506  | haloperidol                    | 10 µM  | MCF7 | 0.391 | 0.058 | -0.122 | 983  |
| 694  | epitiostanol                   | 13 µM  | MCF7 | 0.39  | 0.068 | -0.113 | 4788 |
| 120  | colforsin                      | 50 µM  | HL60 | 0.39  | 0.046 | -0.134 | 783  |
| 28   | mercaptapurine                 | 100 µM | MCF7 | 0.389 | 0.084 | -0.096 | 334  |
| 615  | ranitidine                     | 11 µM  | HL60 | 0.389 | 0.059 | -0.121 | 1404 |
| 645  | beta-escin                     | 3 µM   | HL60 | 0.387 | 0.067 | -0.112 | 2194 |
| 754  | dimenhydrinate                 | 9 µM   | PC3  | 0.387 | 0.058 | -0.121 | 6352 |
| 677  | cyclic adenosine monophosphate | 12 µM  | MCF7 | 0.387 | 0.065 | -0.114 | 3531 |
| 703  | Prestwick-1080                 | 15 µM  | PC3  | 0.387 | 0.068 | -0.111 | 4532 |

|     |                        |        |      |       |       |        |      |
|-----|------------------------|--------|------|-------|-------|--------|------|
| 689 | tetroquinone           | 21 µM  | PC3  | 0.387 | 0.087 | -0.091 | 4078 |
| 618 | sulfamethoxazole       | 16 µM  | HL60 | 0.387 | 0.072 | -0.107 | 2335 |
| 116 | butirosin              | 10 µM  | PC3  | 0.386 | 0.051 | -0.127 | 666  |
| 691 | corticosterone         | 12 µM  | MCF7 | 0.386 | 0.085 | -0.093 | 4145 |
| 653 | ketoconazole           | 8 µM   | MCF7 | 0.386 | 0.071 | -0.108 | 2640 |
| 622 | vinpocetine            | 11 µM  | HL60 | 0.385 | 0.059 | -0.119 | 1557 |
| 641 | convolamine            | 12 µM  | HL60 | 0.385 | 0.048 | -0.129 | 1779 |
| 661 | esculetin              | 22 µM  | HL60 | 0.384 | 0.059 | -0.119 | 3120 |
| 610 | acebutolol             | 11 µM  | PC3  | 0.384 | 0.071 | -0.106 | 1911 |
| 734 | ramifenazone           | 14 µM  | PC3  | 0.384 | 0.071 | -0.106 | 5879 |
| 680 | glycopyrronium bromide | 10 µM  | PC3  | 0.383 | 0.055 | -0.122 | 3687 |
| 63  | copper sulfate         | 100 µM | PC3  | 0.383 | 0.056 | -0.121 | 459  |
| 713 | cefalexin              | 11 µM  | PC3  | 0.383 | 0.054 | -0.123 | 4654 |
| 733 | kaempferol             | 14 µM  | PC3  | 0.382 | 0.068 | -0.108 | 5839 |
| 677 | lansoprazole           | 11 µM  | MCF7 | 0.382 | 0.068 | -0.108 | 3529 |
| 753 | amphotericin B         | 4 µM   | PC3  | 0.381 | 0.067 | -0.109 | 6303 |
| 733 | ticarcillin            | 9 µM   | PC3  | 0.38  | 0.068 | -0.108 | 5829 |
| 733 | mifepristone           | 9 µM   | PC3  | 0.379 | 0.045 | -0.129 | 5827 |
| 746 | quinidine              | 11 µM  | MCF7 | 0.378 | 0.059 | -0.115 | 6267 |
| 632 | prednisone             | 11 µM  | MCF7 | 0.378 | 0.033 | -0.141 | 1478 |
| 658 | simvastatin            | 10 µM  | HL60 | 0.378 | 0.064 | -0.111 | 3002 |
| 754 | tribenoside            | 8 µM   | PC3  | 0.377 | 0.039 | -0.135 | 6328 |
| 718 | diprophylline          | 16 µM  | PC3  | 0.377 | 0.064 | -0.11  | 5063 |
| 689 | moxonidine             | 17 µM  | PC3  | 0.377 | 0.094 | -0.08  | 4084 |
| 659 | caffeic acid           | 22 µM  | HL60 | 0.375 | 0.07  | -0.103 | 3053 |
| 612 | captopril              | 17 µM  | HL60 | 0.375 | 0.046 | -0.127 | 1988 |
| 733 | hecogenin              | 9 µM   | PC3  | 0.375 | 0.064 | -0.109 | 5818 |
| 17  | TTNPB                  | 100 nM | MCF7 | 0.374 | 0.083 | -0.09  | 223  |
| 647 | dobutamine             | 12 µM  | MCF7 | 0.374 | 0.051 | -0.121 | 3206 |
| 704 | pentamidine            | 7 µM   | PC3  | 0.373 | 0.052 | -0.12  | 4573 |
| 622 | praziquantel           | 13 µM  | HL60 | 0.373 | 0.059 | -0.113 | 1572 |
| 670 | isocarboxazid          | 17 µM  | MCF7 | 0.372 | 0.058 | -0.114 | 3424 |
| 41  | estradiol              | 10 nM  | HL60 | 0.371 | 0.092 | -0.079 | 387  |
| 732 | mianserin              | 13 µM  | PC3  | 0.37  | 0.072 | -0.099 | 5786 |
| 651 | iopromide              | 5 µM   | HL60 | 0.37  | 0.056 | -0.114 | 2739 |
| 693 | salsolinol             | 15 µM  | PC3  | 0.369 | 0.052 | -0.118 | 4232 |
| 611 | moroxydine             | 19 µM  | PC3  | 0.369 | 0.055 | -0.116 | 1944 |

|      |                     |        |      |       |       |        |      |
|------|---------------------|--------|------|-------|-------|--------|------|
| 754  | molsidomine         | 17 µM  | PC3  | 0.368 | 0.062 | -0.108 | 6325 |
| 1081 | BCB000040           | 10 µM  | PC3  | 0.367 | 0.049 | -0.12  | 7493 |
| 689  | sitosterol          | 10 µM  | PC3  | 0.367 | 0.054 | -0.115 | 4073 |
| 732  | naltrexone          | 10 µM  | PC3  | 0.367 | 0.066 | -0.104 | 5765 |
| 611  | oleandomycin        | 5 µM   | PC3  | 0.366 | 0.064 | -0.106 | 1935 |
| 646  | labetalol           | 11 µM  | MCF7 | 0.366 | 0.064 | -0.105 | 3167 |
| 715  | (-)-atenolol        | 15 µM  | PC3  | 0.365 | 0.07  | -0.099 | 6725 |
| 751  | fludroxycortide     | 9 µM   | MCF7 | 0.362 | 0.07  | -0.097 | 6039 |
| 623  | phenylpropanolamine | 21 µM  | HL60 | 0.362 | 0.032 | -0.135 | 1602 |
| 54   | iloprost            | 1 µM   | MCF7 | 0.359 | 0.072 | -0.094 | 427  |
| 701  | myosmine            | 27 µM  | PC3  | 0.359 | 0.044 | -0.121 | 4293 |
| 710  | methapyrilene       | 13 µM  | PC3  | 0.359 | 0.06  | -0.106 | 6644 |
| 691  | trimethadione       | 28 µM  | MCF7 | 0.359 | 0.056 | -0.11  | 4165 |
| 612  | khellin             | 15 µM  | HL60 | 0.358 | 0.066 | -0.099 | 2004 |
| 747  | benzydamine         | 12 µM  | MCF7 | 0.358 | 0.052 | -0.113 | 7169 |
| 640  | Trolox C            | 16 µM  | HL60 | 0.357 | 0.053 | -0.112 | 1734 |
| 1036 | Gly-His-Lys         | 1 µM   | PC3  | 0.357 | 0.045 | -0.12  | 6560 |
| 614  | pirenzepine         | 9 µM   | HL60 | 0.357 | 0.04  | -0.124 | 1388 |
| 683  | pramocaine          | 12 µM  | PC3  | 0.356 | 0.042 | -0.123 | 3811 |
| 1040 | 5155877             | 10 µM  | PC3  | 0.356 | 0.068 | -0.097 | 6569 |
| 614  | tamoxifen           | 7 µM   | HL60 | 0.356 | 0.053 | -0.111 | 1366 |
| 692  | gabexate            | 10 µM  | PC3  | 0.355 | 0.05  | -0.114 | 4220 |
| 610  | tolazoline          | 20 µM  | PC3  | 0.355 | 0.044 | -0.12  | 1918 |
| 1000 | AG-013608           | 10 µM  | MCF7 | 0.354 | 0.065 | -0.098 | 5904 |
| 1054 | NS-398              | 10 µM  | PC3  | 0.353 | 0.087 | -0.076 | 6892 |
| 709  | oxolamine           | 9 µM   | PC3  | 0.353 | 0.07  | -0.093 | 6624 |
| 641  | pyridoxine          | 19 µM  | HL60 | 0.352 | 0.032 | -0.13  | 1759 |
| 23   | fulvestrant         | 10 nM  | MCF7 | 0.351 | 0.061 | -0.101 | 310  |
| 692  | hydroxyachillin     | 14 µM  | PC3  | 0.35  | 0.067 | -0.095 | 4213 |
| 681  | Prestwick-664       | 8 µM   | PC3  | 0.349 | 0.064 | -0.097 | 3715 |
| 1015 | pioglitazone        | 10 µM  | PC3  | 0.349 | 0.046 | -0.116 | 5977 |
| 1054 | pioglitazone        | 10 µM  | PC3  | 0.349 | 0.073 | -0.088 | 6893 |
| 664  | nifurtimox          | 14 µM  | HL60 | 0.349 | 0.046 | -0.116 | 2908 |
| 703  | PHA-00745360        | 10 µM  | PC3  | 0.347 | 0.053 | -0.107 | 4559 |
| 692  | isoxsuprine         | 12 µM  | PC3  | 0.346 | 0.076 | -0.084 | 4205 |
| 714  | loxapine            | 9 µM   | PC3  | 0.346 | 0.068 | -0.092 | 6694 |
| 17   | tanespimycin        | 100 nM | MCF7 | 0.344 | 0.047 | -0.112 | 221  |

|     |                           |        |        |       |       |        |      |
|-----|---------------------------|--------|--------|-------|-------|--------|------|
| 648 | cefuroxime                | 9 µM   | HL60   | 0.344 | 0.049 | -0.11  | 2526 |
| 612 | metronidazole             | 23 µM  | HL60   | 0.344 | 0.054 | -0.105 | 2003 |
| 719 | aztreonam                 | 9 µM   | PC3    | 0.343 | 0.053 | -0.105 | 5110 |
| 711 | mexiletine                | 19 µM  | MCF7   | 0.342 | 0.066 | -0.092 | 3973 |
| 709 | meclocycline              | 6 µM   | PC3    | 0.341 | 0.056 | -0.101 | 6637 |
| 702 | deferoxamine              | 6 µM   | PC3    | 0.341 | 0.066 | -0.092 | 4317 |
| 623 | brinzolamide              | 10 µM  | HL60   | 0.341 | 0.034 | -0.124 | 1615 |
| 714 | nitrofuraf                | 20 µM  | PC3    | 0.34  | 0.053 | -0.104 | 6721 |
| 734 | leflunomide               | 15 µM  | PC3    | 0.335 | 0.066 | -0.089 | 5884 |
| 610 | captopril                 | 17 µM  | PC3    | 0.334 | 0.039 | -0.115 | 1907 |
| 734 | bambuterol                | 10 µM  | PC3    | 0.334 | 0.059 | -0.095 | 5885 |
| 36  | estradiol                 | 100 nM | MCF7   | 0.332 | 0.069 | -0.085 | 365  |
| 635 | lovastatin                | 10 µM  | HL60   | 0.33  | 0.042 | -0.11  | 2494 |
| 611 | josamycin                 | 5 µM   | PC3    | 0.329 | 0.049 | -0.103 | 1950 |
| 645 | myosmine                  | 27 µM  | HL60   | 0.324 | 0.034 | -0.116 | 2199 |
| 682 | sulfadimidine             | 13 µM  | PC3    | 0.322 | 0.062 | -0.087 | 3765 |
| 37  | rosiglitazone             | 10 µM  | HL60   | 0.321 | 0.061 | -0.088 | 369  |
| 718 | ceftazidime               | 6 µM   | PC3    | 0.32  | 0.047 | -0.101 | 5054 |
| 692 | atovaquone                | 11 µM  | PC3    | 0.319 | 0.048 | -0.1   | 4201 |
| 614 | dihydrostreptomycin       | 3 µM   | HL60   | 0.317 | 0.039 | -0.107 | 1391 |
| 69  | pirinixic acid            | 100 µM | SKMEL5 | 0.317 | 0.064 | -0.083 | 495  |
| 680 | halcinonide               | 9 µM   | PC3    | 0.306 | 0.046 | -0.095 | 3680 |
| 680 | griseofulvin              | 11 µM  | PC3    | 0.3   | 0.051 | -0.087 | 3664 |
| 79  | 15-delta prostaglandin J2 | 10 µM  | SKMEL5 | 0.298 | 0.048 | -0.089 | 564  |
| 23  | sulindac sulfide          | 50 µM  | MCF7   | 0.287 | 0.047 | -0.085 | 308  |
| 693 | indoprofen                | 14 µM  | PC3    | 0.284 | 0.038 | -0.093 | 4249 |
| 710 | dicloxacillin             | 8 µM   | PC3    | 0.278 | 0.045 | -0.083 | 6666 |
| 640 | clorsulon                 | 11 µM  | HL60   | 0.266 | 0.03  | -0.093 | 1735 |
| 708 | bisacodyl                 | 11 µM  | MCF7   | 0     | 0.159 | 0.125  | 5677 |
| 749 | meprylcaine               | 15 µM  | HL60   | 0     | 0.155 | 0.163  | 6123 |
| 751 | helveticoside             | 7 µM   | MCF7   | 0     | 0.152 | 0.147  | 6047 |
| 686 | lanatoside C              | 4 µM   | MCF7   | 0     | 0.152 | 0.225  | 3852 |
| 637 | ranitidine                | 11 µM  | MCF7   | 0     | 0.15  | 0.115  | 2251 |
| 654 | digitoxigenin             | 11 µM  | MCF7   | 0     | 0.146 | 0.152  | 3275 |
| 686 | solasodine                | 10 µM  | MCF7   | 0     | 0.145 | 0.133  | 3830 |
| 705 | sulpiride                 | 12 µM  | MCF7   | 0     | 0.145 | 0.115  | 4389 |
| 714 | urapidil                  | 9 µM   | PC3    | 0     | 0.144 | 0.125  | 6696 |

|      |                             |       |      |   |       |       |      |
|------|-----------------------------|-------|------|---|-------|-------|------|
| 737  | imidurea                    | 10 µM | MCF7 | 0 | 0.14  | 0.123 | 5481 |
| 752  | strophanthidin              | 10 µM | MCF7 | 0 | 0.14  | 0.127 | 6087 |
| 686  | piperacillin                | 7 µM  | MCF7 | 0 | 0.138 | 0.147 | 3845 |
| 749  | ciprofibrate                | 14 µM | HL60 | 0 | 0.137 | 0.142 | 6138 |
| 657  | harmol                      | 16 µM | MCF7 | 0 | 0.136 | 0.126 | 2900 |
| 634  | ceforanide                  | 8 µM  | HL60 | 0 | 0.135 | 0.148 | 2447 |
| 619  | disopyramide                | 12 µM | HL60 | 0 | 0.134 | 0.209 | 2408 |
| 705  | proscillaridin              | 8 µM  | MCF7 | 0 | 0.133 | 0.189 | 4404 |
| 618  | prilocaine                  | 16 µM | HL60 | 0 | 0.133 | 0.168 | 2352 |
| 676  | cyclopenthiiazide           | 11 µM | MCF7 | 0 | 0.133 | 0.179 | 7325 |
| 636  | naltrexone                  | 10 µM | MCF7 | 0 | 0.131 | 0.18  | 2209 |
| 711  | lanatoside C                | 4 µM  | MCF7 | 0 | 0.131 | 0.164 | 3963 |
| 725  | valproic acid               | 50 µM | MCF7 | 0 | 0.131 | 0.122 | 5219 |
| 709  | Prestwick-984               | 9 µM  | PC3  | 0 | 0.13  | 0.083 | 6603 |
| 730  | digoxin                     | 5 µM  | MCF7 | 0 | 0.13  | 0.166 | 5324 |
| 628  | chloramphenicol             | 12 µM | PC3  | 0 | 0.129 | 0.116 | 1795 |
| 676  | proscillaridin              | 8 µM  | MCF7 | 0 | 0.129 | 0.161 | 7340 |
| 95   | arachidonyltrifluoromethane | 10 µM | MCF7 | 0 | 0.128 | 0.146 | 594  |
| 1048 | SC-560                      | 10 µM | PC3  | 0 | 0.127 | 0.153 | 6865 |
| 658  | theobromine                 | 22 µM | HL60 | 0 | 0.127 | 0.156 | 2995 |
| 733  | strophanthidin              | 10 µM | PC3  | 0 | 0.126 | 0.167 | 5826 |
| 707  | ouabain                     | 5 µM  | MCF7 | 0 | 0.126 | 0.153 | 5026 |
| 645  | eldeline                    | 8 µM  | HL60 | 0 | 0.125 | 0.131 | 2171 |
| 690  | suprofen                    | 15 µM | MCF7 | 0 | 0.125 | 0.196 | 4123 |
| 692  | digitoxigenin               | 11 µM | PC3  | 0 | 0.125 | 0.125 | 4217 |
| 726  | flurbiprofen                | 16 µM | MCF7 | 0 | 0.125 | 0.108 | 5269 |
| 699  | trimethoprim                | 14 µM | MCF7 | 0 | 0.124 | 0.152 | 4701 |
| 751  | Prestwick-675               | 10 µM | MCF7 | 0 | 0.124 | 0.2   | 6042 |
| 726  | digoxigenin                 | 10 µM | MCF7 | 0 | 0.124 | 0.199 | 5275 |
| 687  | lycorine                    | 12 µM | MCF7 | 0 | 0.124 | 0.199 | 3891 |
| 686  | pempidine                   | 13 µM | MCF7 | 0 | 0.122 | 0.115 | 3832 |
| 711  | helveticoside               | 7 µM  | MCF7 | 0 | 0.122 | 0.142 | 3945 |
| 692  | probenecid                  | 14 µM | PC3  | 0 | 0.121 | 0.146 | 4185 |
| 688  | ethambutol                  | 14 µM | PC3  | 0 | 0.12  | 0.125 | 4001 |
| 616  | naltrexone                  | 10 µM | PC3  | 0 | 0.119 | 0.154 | 2047 |
| 673  | hymecromone                 | 23 µM | MCF7 | 0 | 0.119 | 0.128 | 3383 |
| 732  | sulfamethizole              | 15 µM | PC3  | 0 | 0.118 | 0.097 | 5798 |

|      |                       |       |      |   |       |       |      |
|------|-----------------------|-------|------|---|-------|-------|------|
| 658  | amiprilose            | 12 µM | HL60 | 0 | 0.117 | 0.127 | 3000 |
| 1048 | fulvestrant           | 1 µM  | PC3  | 0 | 0.117 | 0.125 | 6867 |
| 755  | butyl hydroxybenzoate | 21 µM | MCF7 | 0 | 0.117 | 0.112 | 6446 |
| 714  | biotin                | 16 µM | PC3  | 0 | 0.117 | 0.104 | 6689 |
| 681  | sulfamerazine         | 15 µM | PC3  | 0 | 0.117 | 0.112 | 3718 |
| 653  | ouabain               | 5 µM  | MCF7 | 0 | 0.116 | 0.119 | 2656 |
| 734  | mesalazine            | 26 µM | PC3  | 0 | 0.116 | 0.141 | 5888 |
| 636  | mianserin             | 13 µM | MCF7 | 0 | 0.116 | 0.155 | 2231 |
| 772  | ioxaglic acid         | 3 µM  | MCF7 | 0 | 0.116 | 0.145 | 7470 |
| 755  | meglumine             | 20 µM | MCF7 | 0 | 0.116 | 0.152 | 6445 |
| 752  | sulfaquinoxaline      | 12 µM | MCF7 | 0 | 0.116 | 0.147 | 6090 |
| 729  | nicotinic acid        | 32 µM | MCF7 | 0 | 0.116 | 0.168 | 5301 |
| 655  | digoxin               | 5 µM  | MCF7 | 0 | 0.115 | 0.109 | 3283 |
| 738  | pentetrazol           | 29 µM | MCF7 | 0 | 0.114 | 0.159 | 5508 |
| 645  | etiocholanolone       | 14 µM | HL60 | 0 | 0.114 | 0.178 | 2204 |
| 618  | fenbufen              | 16 µM | HL60 | 0 | 0.114 | 0.158 | 2346 |
| 1077 | 0316684-0000          | 10 µM | PC3  | 0 | 0.114 | 0.228 | 7098 |
| 686  | helveticoside         | 7 µM  | MCF7 | 0 | 0.114 | 0.217 | 3851 |
| 709  | protoveratrine A      | 5 µM  | PC3  | 0 | 0.114 | 0.115 | 6618 |
| 618  | tiapride              | 11 µM | HL60 | 0 | 0.114 | 0.121 | 2331 |
| 628  | sulindac              | 11 µM | PC3  | 0 | 0.114 | 0.183 | 1815 |
| 733  | cefotaxime            | 8 µM  | PC3  | 0 | 0.113 | 0.187 | 5830 |
| 1071 | AR-A014418            | 10 µM | PC3  | 0 | 0.113 | 0.155 | 7070 |
| 676  | fluvoxamine           | 9 µM  | MCF7 | 0 | 0.113 | 0.154 | 7333 |
| 725  | troglitazone          | 10 µM | MCF7 | 0 | 0.112 | 0.17  | 5229 |
| 618  | hydralazine           | 20 µM | HL60 | 0 | 0.112 | 0.142 | 2349 |
| 743  | antazoline            | 13 µM | MCF7 | 0 | 0.112 | 0.12  | 6775 |
| 713  | timolol               | 9 µM  | PC3  | 0 | 0.112 | 0.204 | 4685 |
| 673  | aminophylline         | 10 µM | MCF7 | 0 | 0.112 | 0.171 | 3374 |
| 741  | lymecycline           | 7 µM  | MCF7 | 0 | 0.111 | 0.108 | 5994 |
| 634  | niridazole            | 19 µM | HL60 | 0 | 0.111 | 0.113 | 2440 |
| 17   | tomelukast            | 1 µM  | MCF7 | 0 | 0.111 | 0.084 | 222  |
| 733  | diazoxide             | 17 µM | PC3  | 0 | 0.111 | 0.131 | 5810 |
| 650  | fulvestrant           | 10 nM | HL60 | 0 | 0.111 | 0.122 | 2698 |
| 706  | naphazoline           | 16 µM | MCF7 | 0 | 0.111 | 0.218 | 4949 |
| 705  | captopril             | 17 µM | MCF7 | 0 | 0.111 | 0.184 | 4410 |
| 682  | lanatoside C          | 4 µM  | PC3  | 0 | 0.11  | 0.143 | 3771 |

|      |                           |        |        |   |       |       |      |
|------|---------------------------|--------|--------|---|-------|-------|------|
| 641  | cytisine                  | 21 µM  | HL60   | 0 | 0.11  | 0.194 | 1766 |
| 61   | TTNPB                     | 100 nM | PC3    | 0 | 0.11  | 0.127 | 451  |
| 749  | dorzolamide               | 11 µM  | HL60   | 0 | 0.11  | 0.095 | 6142 |
| 628  | triamterene               | 16 µM  | PC3    | 0 | 0.11  | 0.183 | 1819 |
| 45   | nordihydroguaiaretic acid | 1 µM   | ssMCF7 | 0 | 0.11  | 0.138 | 415  |
| 758  | digoxigenin               | 10 µM  | MCF7   | 0 | 0.11  | 0.154 | 5640 |
| 690  | nafcillin                 | 9 µM   | MCF7   | 0 | 0.109 | 0.13  | 4103 |
| 644  | gelsemine                 | 12 µM  | HL60   | 0 | 0.109 | 0.167 | 2162 |
| 644  | trimethylcolchicinic acid | 12 µM  | HL60   | 0 | 0.108 | 0.126 | 2146 |
| 731  | ciprofibrate              | 14 µM  | PC3    | 0 | 0.108 | 0.117 | 5740 |
| 743  | sulfaquinoxaline          | 12 µM  | MCF7   | 0 | 0.108 | 0.155 | 6788 |
| 645  | lanatoside C              | 4 µM   | HL60   | 0 | 0.108 | 0.155 | 2193 |
| 662  | alpha-yohimbine           | 10 µM  | MCF7   | 0 | 0.108 | 0.152 | 2778 |
| 690  | etofenamate               | 11 µM  | MCF7   | 0 | 0.108 | 0.137 | 4108 |
| 730  | ceforanide                | 8 µM   | MCF7   | 0 | 0.108 | 0.22  | 5351 |
| 628  | acetazolamide             | 18 µM  | PC3    | 0 | 0.108 | 0.207 | 1808 |
| 708  | hymecromone               | 23 µM  | MCF7   | 0 | 0.108 | 0.102 | 5684 |
| 656  | rifampicin                | 5 µM   | MCF7   | 0 | 0.108 | 0.129 | 2847 |
| 1059 | BAS-012416453             | 38 µM  | MCF7   | 0 | 0.108 | 0.146 | 6908 |
| 762  | pentoxifylline            | 14 µM  | PC3    | 0 | 0.107 | 0.202 | 7319 |
| 746  | hexylcaine                | 13 µM  | MCF7   | 0 | 0.107 | 0.222 | 6244 |
| 1005 | fulvestrant               | 1 µM   | PC3    | 0 | 0.107 | 0.083 | 5931 |
| 664  | 3-acetamidocoumarin       | 20 µM  | HL60   | 0 | 0.107 | 0.169 | 2941 |
| 743  | cefoxitin                 | 9 µM   | MCF7   | 0 | 0.107 | 0.209 | 6796 |
| 711  | 0317956-0000              | 1 µM   | MCF7   | 0 | 0.106 | 0.123 | 3969 |
| 673  | bretylum tosilate         | 10 µM  | MCF7   | 0 | 0.106 | 0.12  | 3394 |
| 710  | velnacrine                | 12 µM  | PC3    | 0 | 0.105 | 0.1   | 6651 |
| 735  | clopamide                 | 12 µM  | MCF7   | 0 | 0.105 | 0.208 | 5402 |
| 729  | meglumine                 | 20 µM  | MCF7   | 0 | 0.105 | 0.189 | 5285 |
| 686  | spiramycin                | 5 µM   | MCF7   | 0 | 0.104 | 0.121 | 3844 |
| 766  | aceclofenac               | 11 µM  | MCF7   | 0 | 0.103 | 0.147 | 7029 |
| 644  | diflorasone               | 8 µM   | HL60   | 0 | 0.103 | 0.122 | 2142 |
| 630  | guanfacine                | 14 µM  | HL60   | 0 | 0.103 | 0.171 | 1279 |
| 738  | mometasone                | 8 µM   | MCF7   | 0 | 0.102 | 0.189 | 5541 |
| 713  | pirenperone               | 10 µM  | PC3    | 0 | 0.102 | 0.124 | 4679 |
| 735  | ganciclovir               | 16 µM  | MCF7   | 0 | 0.102 | 0.142 | 5389 |
| 737  | tridihexethyl             | 11 µM  | MCF7   | 0 | 0.102 | 0.128 | 5486 |



|      |                                |        |      |   |       |       |      |
|------|--------------------------------|--------|------|---|-------|-------|------|
| 658  | theophylline                   | 20 µM  | HL60 | 0 | 0.102 | 0.148 | 2986 |
| 39   | cobalt chloride                | 100 µM | MCF7 | 0 | 0.101 | 0.099 | 379  |
| 702  | bendroflumethiazide            | 9 µM   | PC3  | 0 | 0.101 | 0.101 | 4315 |
| 1000 | estradiol                      | 10 nM  | MCF7 | 0 | 0.101 | 0.115 | 5905 |
| 645  | helveticoside                  | 7 µM   | HL60 | 0 | 0.101 | 0.143 | 2192 |
| 729  | ciprofloxacin                  | 11 µM  | MCF7 | 0 | 0.101 | 0.156 | 5299 |
| 120  | estradiol                      | 10 nM  | HL60 | 0 | 0.101 | 0.162 | 782  |
| 692  | sulfathiazole                  | 16 µM  | PC3  | 0 | 0.101 | 0.143 | 4183 |
| 41   | wortmannin                     | 10 nM  | HL60 | 0 | 0.1   | 0.087 | 389  |
| 749  | sertaconazole                  | 8 µM   | HL60 | 0 | 0.1   | 0.103 | 6128 |
| 704  | prednisone                     | 11 µM  | PC3  | 0 | 0.1   | 0.181 | 4577 |
| 730  | erythromycin                   | 5 µM   | MCF7 | 0 | 0.1   | 0.203 | 5329 |
| 654  | Chicago Sky Blue 6B            | 4 µM   | MCF7 | 0 | 0.1   | 0.203 | 3266 |
| 741  | harmol                         | 16 µM  | MCF7 | 0 | 0.099 | 0.132 | 6022 |
| 677  | iopanoic acid                  | 7 µM   | MCF7 | 0 | 0.099 | 0.161 | 3527 |
| 694  | digitoxigenin                  | 11 µM  | MCF7 | 0 | 0.099 | 0.206 | 4801 |
| 686  | PHA-00851261E                  | 10 µM  | MCF7 | 0 | 0.099 | 0.137 | 3854 |
| 671  | iopamidol                      | 5 µM   | MCF7 | 0 | 0.099 | 0.162 | 3473 |
| 20   | MK-886                         | 1 µM   | MCF7 | 0 | 0.099 | 0.062 | 264  |
| 1047 | 16,16-dimethylprostaglandin E2 | 10 µM  | MCF7 | 0 | 0.099 | 0.103 | 6597 |
| 626  | tanespimycin                   | 1 µM   | MCF7 | 0 | 0.099 | 0.143 | 1650 |
| 749  | ondansetron                    | 12 µM  | HL60 | 0 | 0.099 | 0.196 | 6153 |
| 646  | mebeverine                     | 9 µM   | MCF7 | 0 | 0.099 | 0.154 | 3193 |
| 738  | sulfaphenazole                 | 13 µM  | MCF7 | 0 | 0.099 | 0.159 | 5507 |
| 736  | betazole                       | 27 µM  | MCF7 | 0 | 0.098 | 0.107 | 5445 |
| 747  | sulfamonomethoxine             | 14 µM  | MCF7 | 0 | 0.098 | 0.24  | 7200 |
| 743  | naproxen                       | 16 µM  | MCF7 | 0 | 0.098 | 0.199 | 6794 |
| 749  | piretanide                     | 11 µM  | HL60 | 0 | 0.098 | 0.156 | 6144 |
| 616  | spironolactone                 | 10 µM  | PC3  | 0 | 0.098 | 0.147 | 2064 |
| 654  | meclocycline                   | 6 µM   | MCF7 | 0 | 0.098 | 0.17  | 3277 |
| 645  | solasodine                     | 10 µM  | HL60 | 0 | 0.098 | 0.158 | 2170 |
| 665  | Prestwick-1103                 | 20 µM  | HL60 | 0 | 0.098 | 0.165 | 2978 |
| 699  | kawain                         | 17 µM  | MCF7 | 0 | 0.098 | 0.174 | 4693 |
| 21   | thalidomide                    | 100 µM | MCF7 | 0 | 0.098 | 0.174 | 266  |
| 1065 | PHA-00846566E                  | 10 µM  | PC3  | 0 | 0.097 | 0.117 | 7046 |
| 660  | altretamine                    | 19 µM  | HL60 | 0 | 0.097 | 0.228 | 3090 |
| 615  | nifenazone                     | 13 µM  | HL60 | 0 | 0.097 | 0.134 | 1439 |

|      |                                 |        |      |   |       |       |      |
|------|---------------------------------|--------|------|---|-------|-------|------|
| 654  | mebhydrolin                     | 5 µM   | MCF7 | 0 | 0.097 | 0.125 | 3269 |
| 755  | oxybenzone                      | 18 µM  | MCF7 | 0 | 0.097 | 0.126 | 6469 |
| 628  | benzonatate                     | 7 µM   | PC3  | 0 | 0.097 | 0.202 | 1801 |
| 732  | lobeline                        | 11 µM  | PC3  | 0 | 0.097 | 0.099 | 5784 |
| 628  | sulfacetamide                   | 16 µM  | PC3  | 0 | 0.097 | 0.153 | 1817 |
| 644  | gramine                         | 23 µM  | HL60 | 0 | 0.097 | 0.179 | 2143 |
| 764  | sulfapyridine                   | 16 µM  | PC3  | 0 | 0.097 | 0.122 | 7151 |
| 729  | tacrine                         | 16 µM  | MCF7 | 0 | 0.096 | 0.214 | 5297 |
| 1080 | 15(S)-15-methylprostaglandin E2 | 10 µM  | MCF7 | 0 | 0.096 | 0.115 | 7489 |
| 1077 | fulvestrant                     | 1 µM   | PC3  | 0 | 0.096 | 0.173 | 7096 |
| 694  | zardaverine                     | 15 µM  | MCF7 | 0 | 0.096 | 0.207 | 4793 |
| 672  | araine                          | 15 µM  | MCF7 | 0 | 0.096 | 0.121 | 3349 |
| 690  | amiprilose                      | 12 µM  | MCF7 | 0 | 0.096 | 0.115 | 4119 |
| 654  | piperine                        | 14 µM  | MCF7 | 0 | 0.096 | 0.133 | 3263 |
| 755  | bephenium hydroxynaphthoate     | 9 µM   | MCF7 | 0 | 0.096 | 0.124 | 6466 |
| 727  | valproic acid                   | 1 mM   | PC3  | 0 | 0.095 | 0.157 | 4433 |
| 743  | cefapirin                       | 9 µM   | MCF7 | 0 | 0.095 | 0.151 | 6790 |
| 706  | Prestwick-857                   | 12 µM  | MCF7 | 0 | 0.095 | 0.134 | 4980 |
| 670  | sulfadimethoxine                | 13 µM  | MCF7 | 0 | 0.095 | 0.162 | 3441 |
| 713  | azathioprine                    | 14 µM  | PC3  | 0 | 0.095 | 0.131 | 4667 |
| 662  | demecarium bromide              | 6 µM   | MCF7 | 0 | 0.095 | 0.151 | 2773 |
| 749  | cefepime                        | 7 µM   | HL60 | 0 | 0.095 | 0.14  | 6159 |
| 708  | josamycin                       | 5 µM   | MCF7 | 0 | 0.095 | 0.113 | 5692 |
| 708  | dimethadione                    | 31 µM  | MCF7 | 0 | 0.094 | 0.162 | 5668 |
| 614  | chlorphenamine                  | 10 µM  | HL60 | 0 | 0.094 | 0.176 | 1371 |
| 718  | harmalol                        | 15 µM  | PC3  | 0 | 0.094 | 0.108 | 5076 |
| 95   | monastrol                       | 100 µM | MCF7 | 0 | 0.094 | 0.129 | 596  |
| 698  | guanadrel                       | 8 µM   | PC3  | 0 | 0.094 | 0.156 | 7396 |
| 694  | minoxidil                       | 19 µM  | MCF7 | 0 | 0.094 | 0.201 | 4800 |
| 738  | cyclic adenosine monophosphate  | 12 µM  | MCF7 | 0 | 0.094 | 0.171 | 5533 |
| 644  | sparteine                       | 17 µM  | HL60 | 0 | 0.093 | 0.146 | 2134 |
| 706  | araine                          | 15 µM  | MCF7 | 0 | 0.093 | 0.171 | 4974 |
| 738  | dropropizine                    | 17 µM  | MCF7 | 0 | 0.093 | 0.143 | 5531 |
| 658  | indoprofen                      | 14 µM  | HL60 | 0 | 0.093 | 0.13  | 3007 |
| 677  | Prestwick-1082                  | 12 µM  | MCF7 | 0 | 0.093 | 0.151 | 3530 |
| 612  | oxybuprocaine                   | 12 µM  | HL60 | 0 | 0.093 | 0.114 | 1976 |
| 718  | etofylline                      | 18 µM  | PC3  | 0 | 0.093 | 0.126 | 5048 |

|      |                        |       |      |   |       |       |      |
|------|------------------------|-------|------|---|-------|-------|------|
| 686  | 0317956-0000           | 10 µM | MCF7 | 0 | 0.093 | 0.135 | 3855 |
| 1029 | C-75                   | 10 µM | PC3  | 0 | 0.093 | 0.172 | 6428 |
| 690  | etifenin               | 12 µM | MCF7 | 0 | 0.093 | 0.107 | 4117 |
| 619  | acemetacin             | 10 µM | HL60 | 0 | 0.093 | 0.221 | 2411 |
| 733  | ursolic acid           | 9 µM  | PC3  | 0 | 0.092 | 0.125 | 5825 |
| 715  | ioversol               | 5 µM  | PC3  | 0 | 0.092 | 0.133 | 6726 |
| 1041 | Gly-His-Lys            | 1 µM  | MCF7 | 0 | 0.092 | 0.226 | 6575 |
| 749  | methantheinium bromide | 10 µM | HL60 | 0 | 0.092 | 0.218 | 6137 |
| 112  | benserazide            | 10 µM | MCF7 | 0 | 0.092 | 0.161 | 641  |
| 762  | Trolox C               | 16 µM | PC3  | 0 | 0.092 | 0.131 | 7304 |
| 662  | folic acid             | 9 µM  | MCF7 | 0 | 0.092 | 0.113 | 2783 |
| 771  | triprolidine           | 13 µM | MCF7 | 0 | 0.092 | 0.209 | 7408 |
| 618  | pentolonium            | 7 µM  | HL60 | 0 | 0.091 | 0.118 | 2343 |
| 715  | digoxin                | 5 µM  | PC3  | 0 | 0.091 | 0.227 | 6724 |
| 665  | penbutolol             | 6 µM  | HL60 | 0 | 0.091 | 0.231 | 2972 |
| 725  | rosiglitazone          | 10 µM | MCF7 | 0 | 0.091 | 0.175 | 5230 |
| 645  | betonicine             | 25 µM | HL60 | 0 | 0.091 | 0.209 | 2207 |
| 711  | vincamine              | 11 µM | MCF7 | 0 | 0.091 | 0.11  | 3976 |
| 618  | vincamine              | 11 µM | HL60 | 0 | 0.091 | 0.137 | 2367 |
| 629  | mefenamic acid         | 17 µM | HL60 | 0 | 0.091 | 0.153 | 1863 |
| 744  | kinetin                | 19 µM | MCF7 | 0 | 0.091 | 0.168 | 6813 |
| 692  | epitiostanol           | 13 µM | PC3  | 0 | 0.091 | 0.126 | 4204 |
| 702  | sulfadimidine          | 13 µM | PC3  | 0 | 0.09  | 0.149 | 4322 |
| 728  | estropipate            | 9 µM  | PC3  | 0 | 0.09  | 0.176 | 4472 |
| 744  | stachydrine            | 22 µM | MCF7 | 0 | 0.09  | 0.143 | 6805 |
| 646  | sulfinpyrazone         | 10 µM | MCF7 | 0 | 0.09  | 0.087 | 3192 |
| 738  | aztreonam              | 9 µM  | MCF7 | 0 | 0.09  | 0.116 | 5535 |
| 663  | palmatine              | 10 µM | MCF7 | 0 | 0.09  | 0.218 | 2795 |
| 110b | fulvestrant            | 1 µM  | PC3  | 0 | 0.09  | 0.095 | 704  |
| 651  | hexylcaine             | 13 µM | HL60 | 0 | 0.09  | 0.122 | 2708 |
| 634  | serotonin              | 19 µM | HL60 | 0 | 0.09  | 0.155 | 2449 |
| 758  | timolol                | 9 µM  | MCF7 | 0 | 0.09  | 0.157 | 5645 |
| 713  | thiopamide             | 10 µM | PC3  | 0 | 0.09  | 0.175 | 4675 |
| 693  | tocainide              | 17 µM | PC3  | 0 | 0.09  | 0.157 | 4256 |
| 695  | tocainide              | 17 µM | MCF7 | 0 | 0.09  | 0.223 | 4838 |
| 715  | rolitetracycline       | 8 µM  | PC3  | 0 | 0.09  | 0.113 | 6731 |
| 692  | idoxuridine            | 11 µM | PC3  | 0 | 0.09  | 0.177 | 4200 |

|      |                       |        |      |   |       |       |      |
|------|-----------------------|--------|------|---|-------|-------|------|
| 627  | adiphenine            | 11 µM  | MCF7 | 0 | 0.09  | 0.142 | 1709 |
| 628  | dexpanthenol          | 19 µM  | PC3  | 0 | 0.09  | 0.184 | 1802 |
| 1077 | AR-A014418            | 10 µM  | PC3  | 0 | 0.089 | 0.211 | 7097 |
| 699  | metaraminol           | 9 µM   | MCF7 | 0 | 0.089 | 0.199 | 4692 |
| 736  | sulfasalazine         | 10 µM  | MCF7 | 0 | 0.089 | 0.113 | 5446 |
| 711  | flecainide            | 8 µM   | MCF7 | 0 | 0.089 | 0.177 | 3937 |
| 694  | molindone             | 13 µM  | MCF7 | 0 | 0.089 | 0.15  | 4784 |
| 61   | indometacin           | 100 µM | PC3  | 0 | 0.089 | 0.128 | 452  |
| 634  | melatonin             | 17 µM  | HL60 | 0 | 0.089 | 0.146 | 2431 |
| 749  | saquinavir            | 5 µM   | HL60 | 0 | 0.089 | 0.2   | 6127 |
| 614  | pindolol              | 16 µM  | HL60 | 0 | 0.089 | 0.163 | 1392 |
| 648  | tetrandrine           | 6 µM   | HL60 | 0 | 0.089 | 0.154 | 2520 |
| 702  | flecainide            | 8 µM   | PC3  | 0 | 0.089 | 0.22  | 4318 |
| 672  | spectinomycin         | 10 µM  | MCF7 | 0 | 0.089 | 0.117 | 3327 |
| 656  | tiaprofenic acid      | 15 µM  | MCF7 | 0 | 0.089 | 0.18  | 2852 |
| 761  | laudanosine           | 11 µM  | PC3  | 0 | 0.088 | 0.195 | 7270 |
| 706  | SR-95639A             | 10 µM  | MCF7 | 0 | 0.088 | 0.117 | 4977 |
| 698  | Prestwick-675         | 10 µM  | PC3  | 0 | 0.088 | 0.152 | 7381 |
| 748  | nadide                | 6 µM   | MCF7 | 0 | 0.088 | 0.12  | 7227 |
| 628  | epirizole             | 17 µM  | PC3  | 0 | 0.088 | 0.242 | 1803 |
| 1071 | CAY-10397             | 10 µM  | PC3  | 0 | 0.088 | 0.126 | 7071 |
| 658  | paromomycin           | 6 µM   | HL60 | 0 | 0.088 | 0.145 | 3017 |
| 743  | midodrine             | 14 µM  | MCF7 | 0 | 0.088 | 0.112 | 6804 |
| 617  | aceclofenac           | 11 µM  | PC3  | 0 | 0.088 | 0.18  | 2117 |
| 613  | chlorhexidine         | 8 µM   | HL60 | 0 | 0.087 | 0.111 | 2025 |
| 704  | etilefrine            | 18 µM  | PC3  | 0 | 0.087 | 0.169 | 4590 |
| 699  | sulfamethoxazole      | 16 µM  | MCF7 | 0 | 0.087 | 0.129 | 4690 |
| 619  | chenodeoxycholic acid | 10 µM  | HL60 | 0 | 0.087 | 0.18  | 2402 |
| 627  | allantoin             | 25 µM  | MCF7 | 0 | 0.087 | 0.156 | 1678 |
| 766  | pergolide             | 10 µM  | MCF7 | 0 | 0.087 | 0.179 | 7031 |
| 700  | isosorbide            | 17 µM  | MCF7 | 0 | 0.087 | 0.12  | 4742 |
| 764  | cefapirin             | 9 µM   | PC3  | 0 | 0.087 | 0.116 | 7142 |
| 637  | pyrantel              | 11 µM  | MCF7 | 0 | 0.087 | 0.127 | 2260 |
| 766  | clorsulon             | 11 µM  | MCF7 | 0 | 0.086 | 0.149 | 7025 |
| 732  | propidium iodide      | 6 µM   | PC3  | 0 | 0.086 | 0.118 | 5803 |
| 657  | 10-methoxyharmalan    | 19 µM  | MCF7 | 0 | 0.086 | 0.112 | 2893 |
| 692  | galantamine           | 11 µM  | PC3  | 0 | 0.086 | 0.153 | 4186 |

|      |                       |        |      |   |       |       |      |
|------|-----------------------|--------|------|---|-------|-------|------|
| 681  | Prestwick-674         | 14 µM  | PC3  | 0 | 0.086 | 0.102 | 3716 |
| 629  | homatropine           | 11 µM  | HL60 | 0 | 0.086 | 0.235 | 1848 |
| 661  | Prestwick-972         | 23 µM  | HL60 | 0 | 0.086 | 0.199 | 3132 |
| 6    | chlorpropamide        | 100 µM | MCF7 | 0 | 0.086 | 0.165 | 144  |
| 665  | phensuximide          | 21 µM  | HL60 | 0 | 0.086 | 0.153 | 2960 |
| 764  | ramipril              | 10 µM  | PC3  | 0 | 0.086 | 0.145 | 7144 |
| 672  | indoprofen            | 14 µM  | MCF7 | 0 | 0.086 | 0.145 | 3345 |
| 709  | araine                | 15 µM  | PC3  | 0 | 0.086 | 0.19  | 6629 |
| 705  | prednisone            | 11 µM  | MCF7 | 0 | 0.086 | 0.163 | 4400 |
| 761  | Prestwick-972         | 23 µM  | PC3  | 0 | 0.086 | 0.186 | 7266 |
| 1025 | valdecoxib            | 10 µM  | PC3  | 0 | 0.086 | 0.097 | 6408 |
| 771  | telenzepine           | 9 µM   | MCF7 | 0 | 0.086 | 0.198 | 7419 |
| 747  | cinnarizine           | 11 µM  | MCF7 | 0 | 0.085 | 0.175 | 7174 |
| 634  | biperiden             | 11 µM  | HL60 | 0 | 0.085 | 0.204 | 2460 |
| 703  | oxaprozin             | 14 µM  | PC3  | 0 | 0.085 | 0.16  | 4530 |
| 695  | gibberellic acid      | 12 µM  | MCF7 | 0 | 0.085 | 0.171 | 4818 |
| 505  | quercetin             | 1 µM   | MCF7 | 0 | 0.085 | 0.163 | 917  |
| 746  | lobeline              | 11 µM  | MCF7 | 0 | 0.085 | 0.182 | 6258 |
| 31   | sodium phenylbutyrate | 100 µM | MCF7 | 0 | 0.084 | 0.127 | 341  |
| 712  | chlormezanone         | 15 µM  | PC3  | 0 | 0.084 | 0.167 | 4636 |
| 704  | vitexin               | 9 µM   | PC3  | 0 | 0.084 | 0.179 | 4588 |
| 694  | meptazinol            | 15 µM  | MCF7 | 0 | 0.084 | 0.197 | 4774 |
| 616  | nalbuphine            | 10 µM  | PC3  | 0 | 0.084 | 0.159 | 2063 |
| 690  | levobunolol           | 12 µM  | MCF7 | 0 | 0.084 | 0.205 | 4134 |
| 712  | hycanthone            | 11 µM  | PC3  | 0 | 0.083 | 0.107 | 4630 |
| 747  | Prestwick-689         | 10 µM  | MCF7 | 0 | 0.083 | 0.185 | 7173 |
| 761  | pergolide             | 10 µM  | PC3  | 0 | 0.083 | 0.165 | 7271 |
| 762  | pivmecillinam         | 8 µM   | PC3  | 0 | 0.083 | 0.112 | 7312 |
| 21   | prednisolone          | 1 µM   | MCF7 | 0 | 0.083 | 0.157 | 265  |
| 704  | bicuculline           | 11 µM  | PC3  | 0 | 0.083 | 0.162 | 4574 |
| 630  | ouabain               | 5 µM   | HL60 | 0 | 0.083 | 0.146 | 1302 |
| 729  | moroxydine            | 19 µM  | MCF7 | 0 | 0.083 | 0.13  | 5304 |
| 618  | griseofulvin          | 11 µM  | HL60 | 0 | 0.083 | 0.176 | 2332 |
| 676  | fursultiamine         | 9 µM   | MCF7 | 0 | 0.083 | 0.2   | 7349 |
| 751  | citolone              | 25 µM  | MCF7 | 0 | 0.083 | 0.097 | 6031 |
| 755  | aminohippuric acid    | 21 µM  | MCF7 | 0 | 0.083 | 0.087 | 6453 |
| 610  | sulfathiazole         | 16 µM  | PC3  | 0 | 0.083 | 0.136 | 1883 |

|      |                                |        |      |   |       |       |      |
|------|--------------------------------|--------|------|---|-------|-------|------|
| 733  | suxibuzone                     | 9 µM   | PC3  | 0 | 0.083 | 0.12  | 5806 |
| 737  | hydrastinine                   | 16 µM  | MCF7 | 0 | 0.082 | 0.143 | 5494 |
| 645  | isosorbide                     | 17 µM  | HL60 | 0 | 0.082 | 0.152 | 2183 |
| 736  | 10-methoxyharmalan             | 19 µM  | MCF7 | 0 | 0.082 | 0.159 | 5455 |
| 658  | cefsulodin                     | 7 µM   | HL60 | 0 | 0.082 | 0.097 | 2988 |
| 628  | noretynodrel                   | 13 µM  | PC3  | 0 | 0.082 | 0.138 | 1818 |
| 746  | demecarium bromide             | 6 µM   | MCF7 | 0 | 0.082 | 0.191 | 6269 |
| 720  | lycorine                       | 12 µM  | MCF7 | 0 | 0.082 | 0.322 | 4365 |
| 644  | Prestwick-682                  | 6 µM   | HL60 | 0 | 0.082 | 0.215 | 2164 |
| 733  | nalbuphine                     | 10 µM  | PC3  | 0 | 0.082 | 0.111 | 5820 |
| 743  | butirosin                      | 5 µM   | MCF7 | 0 | 0.082 | 0.149 | 6779 |
| 753  | clebopride                     | 8 µM   | PC3  | 0 | 0.082 | 0.122 | 6311 |
| 505  | 5162773                        | 7 µM   | MCF7 | 0 | 0.082 | 0.14  | 892  |
| 749  | propoxycaine                   | 12 µM  | HL60 | 0 | 0.081 | 0.145 | 6161 |
| 704  | paromomycin                    | 6 µM   | PC3  | 0 | 0.081 | 0.187 | 4595 |
| 665  | cyclic adenosine monophosphate | 12 µM  | HL60 | 0 | 0.081 | 0.248 | 2969 |
| 628  | todalazine                     | 15 µM  | PC3  | 0 | 0.081 | 0.168 | 1799 |
| 737  | ornidazole                     | 18 µM  | MCF7 | 0 | 0.081 | 0.11  | 5483 |
| 642  | prilocaine                     | 16 µM  | MCF7 | 0 | 0.081 | 0.146 | 2314 |
| 53   | LY-294002                      | 100 nM | MCF7 | 0 | 0.081 | 0.132 | 424  |
| 23   | exisulind                      | 50 µM  | MCF7 | 0 | 0.081 | 0.127 | 309  |
| 40   | cobalt chloride                | 100 µM | MCF7 | 0 | 0.081 | 0.088 | 383  |
| 764  | midodrine                      | 14 µM  | PC3  | 0 | 0.081 | 0.216 | 7156 |
| 633  | danazol                        | 12 µM  | MCF7 | 0 | 0.081 | 0.141 | 1538 |
| 745  | cyclopentolate                 | 12 µM  | MCF7 | 0 | 0.081 | 0.153 | 6214 |
| 644  | boldine                        | 12 µM  | HL60 | 0 | 0.081 | 0.2   | 2148 |
| 732  | mephenytoin                    | 18 µM  | PC3  | 0 | 0.08  | 0.117 | 5801 |
| 627  | sulfadiazine                   | 16 µM  | MCF7 | 0 | 0.08  | 0.15  | 1688 |
| 615  | mafenide                       | 18 µM  | HL60 | 0 | 0.08  | 0.213 | 1441 |
| 661  | Prestwick-981                  | 11 µM  | HL60 | 0 | 0.08  | 0.112 | 3125 |
| 612  | pheniramine                    | 11 µM  | HL60 | 0 | 0.08  | 0.146 | 1992 |
| 644  | rescinnamine                   | 6 µM   | HL60 | 0 | 0.08  | 0.2   | 2130 |
| 1094 | BCB000040                      | 10 µM  | MCF7 | 0 | 0.08  | 0.242 | 7554 |
| 612  | diphemanil metilsulfate        | 10 µM  | HL60 | 0 | 0.08  | 0.2   | 1994 |
| 681  | karakoline                     | 11 µM  | PC3  | 0 | 0.08  | 0.19  | 3741 |
| 654  | cefixime                       | 9 µM   | MCF7 | 0 | 0.08  | 0.172 | 3247 |
| 617  | tiratricol                     | 6 µM   | PC3  | 0 | 0.08  | 0.131 | 2096 |

|      |                      |        |        |   |       |       |      |
|------|----------------------|--------|--------|---|-------|-------|------|
| 665  | asiaticoside         | 4 µM   | HL60   | 0 | 0.08  | 0.216 | 2943 |
| 1084 | CP-863187            | 10 µM  | MCF7   | 0 | 0.08  | 0.138 | 7508 |
| 644  | yohimbic acid        | 11 µM  | HL60   | 0 | 0.08  | 0.13  | 2147 |
| 691  | tiaprofenic acid     | 15 µM  | MCF7   | 0 | 0.08  | 0.167 | 4171 |
| 631  | digitoxigenin        | 11 µM  | HL60   | 0 | 0.08  | 0.135 | 1339 |
| 658  | suprofen             | 15 µM  | HL60   | 0 | 0.08  | 0.145 | 3005 |
| 766  | xylometazoline       | 14 µM  | MCF7   | 0 | 0.08  | 0.142 | 7020 |
| 747  | hecogenin            | 9 µM   | MCF7   | 0 | 0.08  | 0.108 | 7175 |
| 628  | mefenamic acid       | 17 µM  | PC3    | 0 | 0.079 | 0.221 | 1821 |
| 692  | calcium pantothenate | 8 µM   | PC3    | 0 | 0.079 | 0.084 | 4189 |
| 603  | fulvestrant          | 10 nM  | PC3    | 0 | 0.079 | 0.116 | 1238 |
| 636  | clindamycin          | 9 µM   | MCF7   | 0 | 0.079 | 0.143 | 2219 |
| 733  | triamcinolone        | 10 µM  | PC3    | 0 | 0.079 | 0.182 | 5835 |
| 504  | 5182598              | 25 µM  | MCF7   | 0 | 0.079 | 0.147 | 868  |
| 628  | atracurium besilate  | 3 µM   | PC3    | 0 | 0.079 | 0.204 | 1824 |
| 729  | diclofenamide        | 13 µM  | MCF7   | 0 | 0.079 | 0.194 | 5286 |
| 656  | R-atenolol           | 15 µM  | MCF7   | 0 | 0.079 | 0.185 | 2855 |
| 691  | ticlopidine          | 13 µM  | MCF7   | 0 | 0.079 | 0.093 | 4155 |
| 693  | (+/-)-catechin       | 14 µM  | PC3    | 0 | 0.079 | 0.094 | 4255 |
| 631  | carcinine            | 22 µM  | HL60   | 0 | 0.079 | 0.126 | 1305 |
| 1055 | NS-398               | 10 µM  | MCF7   | 0 | 0.079 | 0.14  | 6897 |
| 45   | estradiol            | 10 nM  | ssMCF7 | 0 | 0.079 | 0.098 | 414  |
| 686  | PHA-00851261E        | 1 µM   | MCF7   | 0 | 0.079 | 0.161 | 3857 |
| 737  | lobelanidine         | 11 µM  | MCF7   | 0 | 0.079 | 0.119 | 5500 |
| 1014 | sirolimus            | 100 nM | MCF7   | 0 | 0.078 | 0.114 | 5975 |
| 617  | aztreonam            | 9 µM   | PC3    | 0 | 0.078 | 0.108 | 2118 |
| 688  | oxamniquine          | 14 µM  | PC3    | 0 | 0.078 | 0.126 | 4006 |
| 747  | streptozocin         | 15 µM  | MCF7   | 0 | 0.078 | 0.241 | 7193 |
| 694  | scopolamine          | 12 µM  | MCF7   | 0 | 0.078 | 0.115 | 4803 |
| 506  | estradiol            | 100 nM | MCF7   | 0 | 0.078 | 0.135 | 988  |
| 616  | dizocilpine          | 12 µM  | PC3    | 0 | 0.078 | 0.183 | 2069 |
| 678  | mephenytoin          | 18 µM  | MCF7   | 0 | 0.077 | 0.159 | 3580 |
| 646  | furosemide           | 12 µM  | MCF7   | 0 | 0.077 | 0.179 | 3197 |
| 1010 | estradiol            | 10 nM  | MCF7   | 0 | 0.077 | 0.141 | 5955 |
| 703  | thiamazole           | 35 µM  | PC3    | 0 | 0.077 | 0.142 | 4550 |
| 732  | hydroquinine         | 9 µM   | PC3    | 0 | 0.077 | 0.143 | 5789 |
| 1094 | meteneprost          | 10 µM  | MCF7   | 0 | 0.077 | 0.252 | 7552 |

|      |                         |       |      |   |       |       |      |
|------|-------------------------|-------|------|---|-------|-------|------|
| 96   | MK-886                  | 1 µM  | MCF7 | 0 | 0.077 | 0.103 | 601  |
| 660  | tonzonium bromide       | 7 µM  | HL60 | 0 | 0.077 | 0.116 | 3080 |
| 737  | metformin               | 24 µM | MCF7 | 0 | 0.076 | 0.174 | 5487 |
| 619  | fenofibrate             | 11 µM | HL60 | 0 | 0.076 | 0.151 | 2401 |
| 704  | diphemanil metilsulfate | 10 µM | PC3  | 0 | 0.076 | 0.147 | 4591 |
| 738  | metampicillin           | 10 µM | MCF7 | 0 | 0.076 | 0.17  | 5540 |
| 629  | moxisylyte              | 13 µM | HL60 | 0 | 0.076 | 0.17  | 1846 |
| 673  | nizatidine              | 12 µM | MCF7 | 0 | 0.076 | 0.159 | 3385 |
| 713  | probucol                | 8 µM  | PC3  | 0 | 0.076 | 0.131 | 4666 |
| 628  | allantoin               | 25 µM | PC3  | 0 | 0.076 | 0.179 | 1800 |
| 673  | profenamine             | 11 µM | MCF7 | 0 | 0.076 | 0.105 | 3376 |
| 755  | rolipram                | 15 µM | MCF7 | 0 | 0.075 | 0.096 | 6449 |
| 677  | levopropoxyphene        | 7 µM  | MCF7 | 0 | 0.075 | 0.222 | 3543 |
| 734  | bergenin                | 12 µM | PC3  | 0 | 0.075 | 0.101 | 5870 |
| 1025 | PF-01378883-00          | 10 µM | PC3  | 0 | 0.075 | 0.106 | 6410 |
| 648  | strophanthidin          | 10 µM | HL60 | 0 | 0.075 | 0.166 | 2525 |
| 687  | flutamide               | 14 µM | MCF7 | 0 | 0.075 | 0.101 | 3885 |
| 618  | lomefloxacin            | 10 µM | HL60 | 0 | 0.075 | 0.157 | 2348 |
| 644  | sulmazole               | 14 µM | HL60 | 0 | 0.075 | 0.174 | 2153 |
| 766  | isoxicam                | 12 µM | MCF7 | 0 | 0.075 | 0.147 | 7028 |
| 644  | vitexin                 | 9 µM  | HL60 | 0 | 0.075 | 0.198 | 2155 |
| 629  | dapsone                 | 16 µM | HL60 | 0 | 0.075 | 0.223 | 1868 |
| 648  | ramifenazone            | 14 µM | HL60 | 0 | 0.075 | 0.229 | 2534 |
| 746  | cefuroxime              | 9 µM  | MCF7 | 0 | 0.075 | 0.161 | 6261 |
| 688  | carbarsone              | 15 µM | PC3  | 0 | 0.075 | 0.103 | 3991 |
| 1003 | PF-00562151-00          | 10 µM | PC3  | 0 | 0.075 | 0.091 | 5922 |
| 628  | homatropine             | 11 µM | PC3  | 0 | 0.075 | 0.172 | 1806 |
| 733  | doxycycline             | 8 µM  | PC3  | 0 | 0.075 | 0.105 | 5838 |
| 660  | pralidoxime             | 23 µM | HL60 | 0 | 0.074 | 0.215 | 3066 |
| 744  | pindolol                | 16 µM | MCF7 | 0 | 0.074 | 0.143 | 6834 |
| 750  | estradiol               | 10 nM | HL60 | 0 | 0.074 | 0.193 | 6200 |
| 659  | pentetic acid           | 10 µM | HL60 | 0 | 0.074 | 0.14  | 3049 |
| 62   | quinpirole              | 1 µM  | MCF7 | 0 | 0.074 | 0.161 | 456  |
| 692  | molindone               | 13 µM | PC3  | 0 | 0.074 | 0.173 | 4199 |
| 715  | anisomycin              | 15 µM | PC3  | 0 | 0.074 | 0.167 | 6764 |
| 731  | cicloheximide           | 14 µM | PC3  | 0 | 0.074 | 0.196 | 5743 |
| 636  | canrenoic acid          | 10 µM | MCF7 | 0 | 0.074 | 0.172 | 2228 |



|      |                                |       |      |   |       |       |      |
|------|--------------------------------|-------|------|---|-------|-------|------|
| 699  | cefamandole                    | 8 µM  | MCF7 | 0 | 0.074 | 0.172 | 4718 |
| 694  | trichlormethiazide             | 11 µM | MCF7 | 0 | 0.074 | 0.112 | 4783 |
| 695  | doxylamine                     | 10 µM | MCF7 | 0 | 0.074 | 0.107 | 4819 |
| 692  | lumicolchicine                 | 10 µM | PC3  | 0 | 0.073 | 0.128 | 4195 |
| 690  | phenacetin                     | 22 µM | MCF7 | 0 | 0.073 | 0.107 | 4111 |
| 1059 | SB-202190                      | 1 µM  | MCF7 | 0 | 0.073 | 0.116 | 6909 |
| 658  | iodixanol                      | 3 µM  | HL60 | 0 | 0.073 | 0.204 | 3023 |
| 681  | demeclocycline                 | 8 µM  | PC3  | 0 | 0.073 | 0.098 | 3706 |
| 761  | mecamylamine                   | 20 µM | PC3  | 0 | 0.073 | 0.155 | 7263 |
| 619  | lincomycin                     | 9 µM  | HL60 | 0 | 0.073 | 0.133 | 2380 |
| 649  | spiramycin                     | 5 µM  | HL60 | 0 | 0.073 | 0.123 | 2558 |
| 719  | flucloxacillin                 | 8 µM  | PC3  | 0 | 0.073 | 0.142 | 5102 |
| 733  | iopamidol                      | 5 µM  | PC3  | 0 | 0.073 | 0.183 | 5832 |
| 68   | haloperidol                    | 10 µM | MCF7 | 0 | 0.073 | 0.093 | 492  |
| 676  | tracazolate                    | 12 µM | MCF7 | 0 | 0.072 | 0.129 | 7339 |
| 754  | iproniazid                     | 14 µM | PC3  | 0 | 0.072 | 0.179 | 6359 |
| 1005 | pioglitazone                   | 10 µM | PC3  | 0 | 0.072 | 0.109 | 5930 |
| 756  | ketorolac                      | 11 µM | MCF7 | 0 | 0.072 | 0.126 | 6489 |
| 685  | nefopam                        | 14 µM | MCF7 | 0 | 0.072 | 0.161 | 3627 |
| 692  | colistin                       | 3 µM  | PC3  | 0 | 0.072 | 0.136 | 4212 |
| 743  | isopropamide iodide            | 8 µM  | MCF7 | 0 | 0.072 | 0.218 | 6781 |
| 686  | dicoumarol                     | 12 µM | MCF7 | 0 | 0.072 | 0.183 | 3848 |
| 731  | calycanthine                   | 12 µM | PC3  | 0 | 0.072 | 0.193 | 5744 |
| 660  | flucytosine                    | 31 µM | HL60 | 0 | 0.072 | 0.109 | 3073 |
| 761  | isoxicam                       | 12 µM | PC3  | 0 | 0.072 | 0.212 | 7268 |
| 762  | heptaminol                     | 22 µM | PC3  | 0 | 0.072 | 0.176 | 7313 |
| 747  | streptomycin                   | 3 µM  | MCF7 | 0 | 0.072 | 0.235 | 7194 |
| 647  | ambroxol                       | 10 µM | MCF7 | 0 | 0.072 | 0.175 | 3238 |
| 1046 | 16,16-dimethylprostaglandin E2 | 10 µM | PC3  | 0 | 0.072 | 0.085 | 6592 |
| 504  | ikarugamycin                   | 2 µM  | MCF7 | 0 | 0.071 | 0.133 | 866  |
| 693  | amprolium                      | 13 µM | PC3  | 0 | 0.071 | 0.134 | 4241 |
| 635  | rifampicin                     | 5 µM  | HL60 | 0 | 0.071 | 0.167 | 2487 |
| 729  | chlorprothixene                | 11 µM | MCF7 | 0 | 0.071 | 0.222 | 5291 |
| 641  | harmine                        | 16 µM | HL60 | 0 | 0.071 | 0.154 | 1758 |
| 94   | probucof                       | 10 µM | MCF7 | 0 | 0.071 | 0.103 | 592  |
| 747  | strophanthidin                 | 10 µM | MCF7 | 0 | 0.071 | 0.183 | 7182 |
| 733  | cinnarizine                    | 11 µM | PC3  | 0 | 0.071 | 0.093 | 5817 |

|      |                     |        |      |   |       |       |      |
|------|---------------------|--------|------|---|-------|-------|------|
| 753  | dinoprost           | 8 µM   | PC3  | 0 | 0.071 | 0.121 | 6308 |
| 1061 | SB-203580           | 1 µM   | MCF7 | 0 | 0.071 | 0.2   | 6915 |
| 749  | oxedrine            | 24 µM  | HL60 | 0 | 0.071 | 0.153 | 6156 |
| 611  | metanephrine        | 17 µM  | PC3  | 0 | 0.071 | 0.105 | 1933 |
| 766  | laudanoline         | 11 µM  | MCF7 | 0 | 0.071 | 0.212 | 7030 |
| 650  | wortmannin          | 10 nM  | HL60 | 0 | 0.07  | 0.155 | 2703 |
| 709  | theobromine         | 22 µM  | PC3  | 0 | 0.07  | 0.161 | 6613 |
| 627  | dapsone             | 16 µM  | MCF7 | 0 | 0.07  | 0.241 | 1705 |
| 731  | tetrahydroalstonine | 11 µM  | PC3  | 0 | 0.07  | 0.16  | 5728 |
| 692  | pepstatin           | 6 µM   | PC3  | 0 | 0.07  | 0.17  | 4206 |
| 6    | tolbutamide         | 100 µM | MCF7 | 0 | 0.07  | 0.161 | 142  |
| 611  | hesperetin          | 13 µM  | PC3  | 0 | 0.07  | 0.121 | 1947 |
| 745  | racecadotril        | 10 µM  | MCF7 | 0 | 0.07  | 0.165 | 6231 |
| 700  | betonicine          | 25 µM  | MCF7 | 0 | 0.07  | 0.125 | 4767 |
| 618  | salbutamol          | 17 µM  | HL60 | 0 | 0.069 | 0.152 | 2344 |
| 686  | indapamide          | 11 µM  | MCF7 | 0 | 0.069 | 0.182 | 3859 |
| 658  | procyclidine        | 12 µM  | HL60 | 0 | 0.069 | 0.17  | 2991 |
| 729  | fluvastatin         | 9 µM   | MCF7 | 0 | 0.069 | 0.153 | 5290 |
| 671  | iopromide           | 5 µM   | MCF7 | 0 | 0.069 | 0.188 | 3481 |
| 676  | Prestwick-967       | 26 µM  | MCF7 | 0 | 0.069 | 0.116 | 7346 |
| 730  | neostigmine bromide | 13 µM  | MCF7 | 0 | 0.069 | 0.248 | 5335 |
| 745  | chloropyrazine      | 35 µM  | MCF7 | 0 | 0.069 | 0.196 | 6227 |
| 1073 | PHA-00816795        | 10 µM  | PC3  | 0 | 0.069 | 0.141 | 7076 |
| 628  | metrifonate         | 16 µM  | PC3  | 0 | 0.069 | 0.145 | 1797 |
| 677  | quinpirole          | 16 µM  | MCF7 | 0 | 0.069 | 0.19  | 3539 |
| 698  | mephenesin          | 22 µM  | PC3  | 0 | 0.069 | 0.108 | 7374 |
| 628  | moxisylyte          | 13 µM  | PC3  | 0 | 0.069 | 0.144 | 1804 |
| 1046 | PHA-00767505E       | 10 µM  | PC3  | 0 | 0.069 | 0.188 | 6591 |
| 733  | clindamycin         | 9 µM   | PC3  | 0 | 0.069 | 0.092 | 5815 |
| 629  | sulfadiazine        | 16 µM  | HL60 | 0 | 0.068 | 0.154 | 1852 |
| 728  | cefalotin           | 10 µM  | PC3  | 0 | 0.068 | 0.125 | 4482 |
| 680  | Prestwick-675       | 10 µM  | PC3  | 0 | 0.068 | 0.138 | 3682 |
| 765  | estradiol           | 10 nM  | MCF7 | 0 | 0.068 | 0.201 | 7000 |
| 646  | fluphenazine        | 8 µM   | MCF7 | 0 | 0.068 | 0.092 | 3194 |
| 614  | midodrine           | 14 µM  | HL60 | 0 | 0.068 | 0.128 | 1403 |
| 734  | gentamicin          | 3 µM   | PC3  | 0 | 0.068 | 0.159 | 5883 |
| 657  | iobenguane          | 11 µM  | MCF7 | 0 | 0.068 | 0.162 | 2878 |

|      |                             |        |      |   |       |       |      |
|------|-----------------------------|--------|------|---|-------|-------|------|
| 660  | nilutamide                  | 13 µM  | HL60 | 0 | 0.068 | 0.19  | 3104 |
| 771  | bupivacaine                 | 12 µM  | MCF7 | 0 | 0.068 | 0.175 | 7435 |
| 1083 | suramin sodium              | 10 µM  | PC3  | 0 | 0.068 | 0.136 | 7501 |
| 682  | helveticoside               | 7 µM   | PC3  | 0 | 0.068 | 0.179 | 3770 |
| 612  | prednisone                  | 11 µM  | HL60 | 0 | 0.067 | 0.153 | 1978 |
| 694  | zalcitabine                 | 19 µM  | MCF7 | 0 | 0.067 | 0.23  | 4799 |
| 745  | meprylcaine                 | 15 µM  | MCF7 | 0 | 0.067 | 0.148 | 6204 |
| 634  | carbimazole                 | 21 µM  | HL60 | 0 | 0.067 | 0.179 | 2437 |
| 762  | chenodeoxycholic acid       | 10 µM  | PC3  | 0 | 0.067 | 0.18  | 7310 |
| 678  | cefepime                    | 7 µM   | MCF7 | 0 | 0.067 | 0.147 | 3581 |
| 764  | alprenolol                  | 14 µM  | PC3  | 0 | 0.067 | 0.172 | 7141 |
| 731  | cytisine                    | 21 µM  | PC3  | 0 | 0.067 | 0.128 | 5739 |
| 755  | altretamine                 | 19 µM  | MCF7 | 0 | 0.067 | 0.15  | 6467 |
| 755  | pipemidic acid              | 13 µM  | MCF7 | 0 | 0.067 | 0.154 | 6470 |
| 743  | ribostamycin                | 7 µM   | MCF7 | 0 | 0.067 | 0.224 | 6765 |
| 644  | trihexyphenidyl             | 12 µM  | HL60 | 0 | 0.067 | 0.218 | 2158 |
| 634  | nitrofurafal                | 20 µM  | HL60 | 0 | 0.067 | 0.206 | 2459 |
| 683  | phenelzine                  | 17 µM  | PC3  | 0 | 0.067 | 0.143 | 3802 |
| 733  | ketotifen                   | 9 µM   | PC3  | 0 | 0.067 | 0.189 | 5842 |
| 612  | 4-hydroxyphenazone          | 20 µM  | HL60 | 0 | 0.067 | 0.149 | 1997 |
| 689  | selegiline                  | 18 µM  | PC3  | 0 | 0.067 | 0.177 | 4065 |
| 741  | moracizine                  | 9 µM   | MCF7 | 0 | 0.067 | 0.185 | 6000 |
| 660  | butyl hydroxybenzoate       | 21 µM  | HL60 | 0 | 0.067 | 0.166 | 3069 |
| 603  | valproic acid               | 50 µM  | PC3  | 0 | 0.067 | 0.121 | 1222 |
| 26b  | arachidonyltrifluoromethane | 10 µM  | MCF7 | 0 | 0.066 | 0.12  | 327  |
| 648  | delsoline                   | 9 µM   | HL60 | 0 | 0.066 | 0.116 | 2513 |
| 628  | metformin                   | 24 µM  | PC3  | 0 | 0.066 | 0.207 | 1816 |
| 705  | vancomycin                  | 3 µM   | MCF7 | 0 | 0.066 | 0.12  | 4423 |
| 612  | diflunisal                  | 16 µM  | HL60 | 0 | 0.066 | 0.125 | 1990 |
| 651  | hecogenin                   | 9 µM   | HL60 | 0 | 0.066 | 0.134 | 2716 |
| 1041 | alprostadil                 | 10 µM  | MCF7 | 0 | 0.066 | 0.216 | 6576 |
| 1061 | carmustine                  | 100 µM | MCF7 | 0 | 0.066 | 0.205 | 6914 |
| 706  | acebutolol                  | 11 µM  | MCF7 | 0 | 0.066 | 0.2   | 4976 |
| 629  | triflupromazine             | 10 µM  | HL60 | 0 | 0.066 | 0.156 | 1855 |
| 699  | mephentermine               | 9 µM   | MCF7 | 0 | 0.065 | 0.171 | 4707 |
| 623  | zaprinast                   | 15 µM  | HL60 | 0 | 0.065 | 0.207 | 1611 |
| 616  | midodrine                   | 14 µM  | PC3  | 0 | 0.065 | 0.221 | 2087 |

|      |                       |       |      |   |       |       |      |
|------|-----------------------|-------|------|---|-------|-------|------|
| 94   | bucladesine           | 20 µM | MCF7 | 0 | 0.065 | 0.143 | 591  |
| 719  | dropropizine          | 17 µM | PC3  | 0 | 0.065 | 0.102 | 5106 |
| 658  | trimipramine          | 10 µM | HL60 | 0 | 0.065 | 0.2   | 3004 |
| 715  | N6-methyladenosine    | 14 µM | PC3  | 0 | 0.065 | 0.111 | 6732 |
| 709  | acebutolol            | 11 µM | PC3  | 0 | 0.065 | 0.092 | 6631 |
| 654  | dl-alpha tocopherol   | 9 µM  | MCF7 | 0 | 0.065 | 0.165 | 3256 |
| 673  | thiopramide           | 10 µM | MCF7 | 0 | 0.065 | 0.16  | 3392 |
| 663  | conessine             | 11 µM | MCF7 | 0 | 0.065 | 0.2   | 2792 |
| 630  | fusidic acid          | 7 µM  | HL60 | 0 | 0.065 | 0.237 | 1293 |
| 685  | bromopride            | 12 µM | MCF7 | 0 | 0.064 | 0.101 | 3617 |
| 22a  | tacrolimus            | 1 µM  | MCF7 | 0 | 0.064 | 0.191 | 284  |
| 730  | ergocalciferol        | 10 µM | MCF7 | 0 | 0.064 | 0.236 | 5346 |
| 661  | aminocaproic acid     | 30 µM | HL60 | 0 | 0.064 | 0.124 | 3122 |
| 732  | alpha-yohimbine       | 10 µM | PC3  | 0 | 0.064 | 0.18  | 5800 |
| 658  | novobiocin            | 6 µM  | HL60 | 0 | 0.064 | 0.092 | 2990 |
| 678  | thiethylperazine      | 6 µM  | MCF7 | 0 | 0.064 | 0.144 | 3576 |
| 737  | pizotifen             | 9 µM  | MCF7 | 0 | 0.064 | 0.117 | 5491 |
| 505  | 5140203               | 15 µM | MCF7 | 0 | 0.064 | 0.173 | 908  |
| 698  | isocarboxazid         | 17 µM | PC3  | 0 | 0.064 | 0.118 | 7383 |
| 612  | trimethobenzamide     | 9 µM  | HL60 | 0 | 0.064 | 0.169 | 2002 |
| 622  | diperodon             | 9 µM  | HL60 | 0 | 0.064 | 0.129 | 1575 |
| 712  | vanoxerine            | 8 µM  | PC3  | 0 | 0.064 | 0.176 | 4641 |
| 656  | tolazamide            | 13 µM | MCF7 | 0 | 0.064 | 0.146 | 2842 |
| 645  | mepenzolate bromide   | 10 µM | HL60 | 0 | 0.064 | 0.138 | 2169 |
| 705  | Prestwick-692         | 7 µM  | MCF7 | 0 | 0.063 | 0.176 | 4424 |
| 702  | piperacillin          | 7 µM  | PC3  | 0 | 0.063 | 0.159 | 4320 |
| 703  | CP-690334-01          | 1 µM  | PC3  | 0 | 0.063 | 0.169 | 4561 |
| 692  | trichlormethiazide    | 11 µM | PC3  | 0 | 0.063 | 0.113 | 4198 |
| 687  | santonin              | 16 µM | MCF7 | 0 | 0.063 | 0.135 | 3877 |
| 741  | chenodeoxycholic acid | 10 µM | MCF7 | 0 | 0.063 | 0.177 | 6012 |
| 658  | Prestwick-864         | 35 µM | HL60 | 0 | 0.063 | 0.151 | 2994 |
| 1059 | PF-00562151-00        | 10 µM | MCF7 | 0 | 0.063 | 0.176 | 6912 |
| 764  | mebeverine            | 9 µM  | PC3  | 0 | 0.063 | 0.146 | 7147 |
| 741  | lincomycin            | 9 µM  | MCF7 | 0 | 0.063 | 0.141 | 5992 |
| 640  | tetracaine            | 13 µM | HL60 | 0 | 0.063 | 0.162 | 1739 |
| 741  | Prestwick-1103        | 20 µM | MCF7 | 0 | 0.063 | 0.14  | 6019 |
| 744  | amrinone              | 21 µM | MCF7 | 0 | 0.063 | 0.122 | 6826 |

|      |                                 |        |      |   |       |       |      |
|------|---------------------------------|--------|------|---|-------|-------|------|
| 708  | iohexol                         | 5 µM   | MCF7 | 0 | 0.063 | 0.157 | 5704 |
| 731  | tranexamic acid                 | 25 µM  | PC3  | 0 | 0.063 | 0.113 | 5762 |
| 743  | carbinoxamine                   | 10 µM  | MCF7 | 0 | 0.063 | 0.2   | 6786 |
| 692  | zardaverine                     | 15 µM  | PC3  | 0 | 0.063 | 0.096 | 4209 |
| 631  | metrizamide                     | 5 µM   | HL60 | 0 | 0.062 | 0.213 | 1318 |
| 695  | Prestwick-967                   | 26 µM  | MCF7 | 0 | 0.062 | 0.182 | 4833 |
| 613  | dehydrocholic acid              | 10 µM  | HL60 | 0 | 0.062 | 0.183 | 2023 |
| 628  | isoxicam                        | 12 µM  | PC3  | 0 | 0.062 | 0.194 | 1820 |
| 758  | methyldopa                      | 19 µM  | MCF7 | 0 | 0.062 | 0.142 | 5637 |
| 634  | glycocholic acid                | 9 µM   | HL60 | 0 | 0.062 | 0.156 | 2454 |
| 745  | tranexamic acid                 | 25 µM  | MCF7 | 0 | 0.062 | 0.181 | 6238 |
| 612  | doxylamine                      | 10 µM  | HL60 | 0 | 0.062 | 0.117 | 1973 |
| 749  | tropine                         | 28 µM  | HL60 | 0 | 0.062 | 0.205 | 6147 |
| 661  | adipiodone                      | 4 µM   | HL60 | 0 | 0.062 | 0.211 | 3111 |
| 686  | 0317956-0000                    | 1 µM   | MCF7 | 0 | 0.062 | 0.119 | 3858 |
| 702  | lanatoside C                    | 4 µM   | PC3  | 0 | 0.062 | 0.257 | 4328 |
| 610  | dicycloverine                   | 12 µM  | PC3  | 0 | 0.062 | 0.105 | 1902 |
| 733  | isoniazid                       | 29 µM  | PC3  | 0 | 0.062 | 0.161 | 5840 |
| 619  | bumetanide                      | 11 µM  | HL60 | 0 | 0.061 | 0.102 | 2409 |
| 110b | alpha-estradiol                 | 10 nM  | PC3  | 0 | 0.061 | 0.108 | 702  |
| 644  | Prestwick-692                   | 7 µM   | HL60 | 0 | 0.061 | 0.19  | 2165 |
| 646  | streptomycin                    | 3 µM   | MCF7 | 0 | 0.061 | 0.156 | 3195 |
| 755  | terguride                       | 12 µM  | MCF7 | 0 | 0.061 | 0.122 | 6459 |
| 650  | acetylsalicylic acid            | 100 µM | HL60 | 0 | 0.061 | 0.138 | 2664 |
| 617  | metampicillin                   | 10 µM  | PC3  | 0 | 0.061 | 0.23  | 2123 |
| 1032 | PHA-00767505E                   | 10 µM  | PC3  | 0 | 0.061 | 0.103 | 6545 |
| 641  | tomatidine                      | 10 µM  | HL60 | 0 | 0.061 | 0.103 | 1754 |
| 764  | vinburnine                      | 14 µM  | PC3  | 0 | 0.061 | 0.25  | 7154 |
| 673  | equilin                         | 15 µM  | MCF7 | 0 | 0.061 | 0.151 | 3377 |
| 628  | dapsone                         | 16 µM  | PC3  | 0 | 0.061 | 0.236 | 1827 |
| 749  | Prestwick-1085                  | 15 µM  | HL60 | 0 | 0.061 | 0.137 | 6131 |
| 732  | tropine                         | 28 µM  | PC3  | 0 | 0.06  | 0.157 | 5790 |
| 616  | gentamicin                      | 3 µM   | PC3  | 0 | 0.06  | 0.111 | 2082 |
| 743  | pyrithyldione                   | 24 µM  | MCF7 | 0 | 0.06  | 0.181 | 6801 |
| 646  | tremorine                       | 15 µM  | MCF7 | 0 | 0.06  | 0.157 | 3196 |
| 1089 | 15(S)-15-methylprostaglandin E2 | 10 µM  | PC3  | 0 | 0.06  | 0.114 | 7526 |
| 694  | quinisocaine                    | 13 µM  | MCF7 | 0 | 0.06  | 0.107 | 4791 |

|      |                                |        |      |   |       |       |      |
|------|--------------------------------|--------|------|---|-------|-------|------|
| 665  | lansoprazole                   | 11 µM  | HL60 | 0 | 0.06  | 0.224 | 2967 |
| 665  | moracizine                     | 9 µM   | HL60 | 0 | 0.06  | 0.158 | 2959 |
| 632  | isoxsuprine                    | 12 µM  | MCF7 | 0 | 0.06  | 0.202 | 1485 |
| 733  | streptozocin                   | 15 µM  | PC3  | 0 | 0.06  | 0.138 | 5836 |
| 761  | glafenine                      | 10 µM  | PC3  | 0 | 0.06  | 0.119 | 7257 |
| 617  | pentoxifylline                 | 14 µM  | PC3  | 0 | 0.06  | 0.248 | 2127 |
| 644  | glimepiride                    | 8 µM   | HL60 | 0 | 0.06  | 0.133 | 2154 |
| 709  | betahistine                    | 17 µM  | PC3  | 0 | 0.06  | 0.111 | 6611 |
| 734  | acenocoumarol                  | 11 µM  | PC3  | 0 | 0.06  | 0.109 | 5878 |
| 618  | ofloxacin                      | 11 µM  | HL60 | 0 | 0.06  | 0.131 | 2340 |
| 693  | salsolidin                     | 16 µM  | PC3  | 0 | 0.06  | 0.103 | 4226 |
| 631  | chlorogenic acid               | 11 µM  | HL60 | 0 | 0.059 | 0.249 | 1346 |
| 614  | tranexamic acid                | 25 µM  | HL60 | 0 | 0.059 | 0.201 | 1401 |
| 622  | furosemide                     | 12 µM  | HL60 | 0 | 0.059 | 0.163 | 1580 |
| 1075 | PHA-00846566E                  | 10 µM  | PC3  | 0 | 0.059 | 0.161 | 7086 |
| 681  | PNU-0230031                    | 1 µM   | PC3  | 0 | 0.059 | 0.126 | 3735 |
| 650  | fulvestrant                    | 1 µM   | HL60 | 0 | 0.059 | 0.11  | 2665 |
| 712  | crotamiton                     | 20 µM  | PC3  | 0 | 0.059 | 0.096 | 4628 |
| 771  | enalapril                      | 8 µM   | MCF7 | 0 | 0.059 | 0.252 | 7428 |
| 713  | digoxigenin                    | 10 µM  | PC3  | 0 | 0.059 | 0.243 | 4680 |
| 677  | piribedil                      | 12 µM  | MCF7 | 0 | 0.059 | 0.105 | 3512 |
| 676  | tocainide                      | 17 µM  | MCF7 | 0 | 0.059 | 0.123 | 7351 |
| 663  | salsolinol                     | 15 µM  | MCF7 | 0 | 0.059 | 0.143 | 2791 |
| 616  | dihydrostreptomycin            | 3 µM   | PC3  | 0 | 0.059 | 0.177 | 2074 |
| 719  | cyclic adenosine monophosphate | 12 µM  | PC3  | 0 | 0.059 | 0.148 | 5108 |
| 665  | viomycin                       | 5 µM   | HL60 | 0 | 0.059 | 0.22  | 2979 |
| 24   | NU-1025                        | 100 µM | MCF7 | 0 | 0.059 | 0.085 | 313  |
| 734  | sulfadoxine                    | 13 µM  | PC3  | 0 | 0.058 | 0.111 | 5852 |
| 641  | monocrotaline                  | 12 µM  | HL60 | 0 | 0.058 | 0.154 | 1757 |
| 761  | levocabastine                  | 9 µM   | PC3  | 0 | 0.058 | 0.183 | 7249 |
| 734  | mepyramine                     | 10 µM  | PC3  | 0 | 0.058 | 0.101 | 5869 |
| 698  | cefamandole                    | 8 µM   | PC3  | 0 | 0.058 | 0.126 | 7394 |
| 706  | oxolamine                      | 9 µM   | MCF7 | 0 | 0.058 | 0.175 | 4969 |
| 67   | iloprost                       | 1 µM   | MCF7 | 0 | 0.058 | 0.176 | 488  |
| 699  | pentolonium                    | 7 µM   | MCF7 | 0 | 0.058 | 0.221 | 4699 |
| 694  | diflunisal                     | 16 µM  | MCF7 | 0 | 0.058 | 0.272 | 4794 |
| 645  | sulfamerazine                  | 15 µM  | HL60 | 0 | 0.058 | 0.143 | 2181 |

|      |                       |        |      |   |       |       |      |
|------|-----------------------|--------|------|---|-------|-------|------|
| 644  | benzocaine            | 24 µM  | HL60 | 0 | 0.058 | 0.18  | 2167 |
| 686  | acacetin              | 14 µM  | MCF7 | 0 | 0.058 | 0.189 | 3849 |
| 612  | sulpiride             | 12 µM  | HL60 | 0 | 0.058 | 0.14  | 1967 |
| 671  | sulfamonomethoxine    | 14 µM  | MCF7 | 0 | 0.057 | 0.138 | 3484 |
| 630  | clozapine             | 12 µM  | HL60 | 0 | 0.057 | 0.193 | 1289 |
| 513  | rosiglitazone         | 10 µM  | MCF7 | 0 | 0.057 | 0.199 | 1071 |
| 615  | flumequine            | 15 µM  | HL60 | 0 | 0.057 | 0.128 | 1429 |
| 685  | PNU-0230031           | 1 µM   | MCF7 | 0 | 0.057 | 0.163 | 3632 |
| 1007 | PF-00539745-00        | 10 µM  | PC3  | 0 | 0.057 | 0.154 | 5939 |
| 657  | thiamine              | 12 µM  | MCF7 | 0 | 0.057 | 0.125 | 2894 |
| 730  | metanephrine          | 17 µM  | MCF7 | 0 | 0.057 | 0.136 | 5334 |
| 692  | naftopidil            | 9 µM   | PC3  | 0 | 0.057 | 0.139 | 4193 |
| 504  | bucladesine           | 2 µM   | MCF7 | 0 | 0.057 | 0.152 | 842  |
| 632  | sulfathiazole         | 16 µM  | MCF7 | 0 | 0.057 | 0.181 | 1463 |
| 502  | 5182598               | 25 µM  | MCF7 | 0 | 0.057 | 0.138 | 976  |
| 771  | acemetacin            | 10 µM  | MCF7 | 0 | 0.057 | 0.223 | 7442 |
| 661  | atropine methonitrate | 11 µM  | HL60 | 0 | 0.056 | 0.15  | 3116 |
| 715  | betamethasone         | 10 µM  | PC3  | 0 | 0.056 | 0.157 | 6728 |
| 704  | novobiocin            | 6 µM   | PC3  | 0 | 0.056 | 0.104 | 4569 |
| 687  | homosalate            | 15 µM  | MCF7 | 0 | 0.056 | 0.207 | 3879 |
| 1027 | PF-00539758-00        | 10 µM  | PC3  | 0 | 0.056 | 0.214 | 6421 |
| 710  | ouabain               | 5 µM   | PC3  | 0 | 0.056 | 0.223 | 6680 |
| 602  | acetylsalicylic acid  | 100 µM | HL60 | 0 | 0.056 | 0.165 | 1145 |
| 628  | triflupromazine       | 10 µM  | PC3  | 0 | 0.056 | 0.179 | 1813 |
| 729  | mimosine              | 20 µM  | MCF7 | 0 | 0.056 | 0.17  | 5302 |
| 754  | tolfenamic acid       | 15 µM  | PC3  | 0 | 0.056 | 0.094 | 6354 |
| 634  | cefotiam              | 7 µM   | HL60 | 0 | 0.056 | 0.221 | 2458 |
| 658  | carbenoxolone         | 7 µM   | HL60 | 0 | 0.056 | 0.229 | 3014 |
| 644  | canadine              | 12 µM  | HL60 | 0 | 0.056 | 0.183 | 2163 |
| 735  | aminophylline         | 10 µM  | MCF7 | 0 | 0.056 | 0.118 | 5395 |
| 505  | decitabine            | 100 nM | MCF7 | 0 | 0.055 | 0.221 | 920  |
| 648  | alclometasone         | 8 µM   | HL60 | 0 | 0.055 | 0.149 | 2532 |
| 618  | fludrocortisone       | 9 µM   | HL60 | 0 | 0.055 | 0.239 | 2368 |
| 505  | 5213008               | 18 µM  | MCF7 | 0 | 0.055 | 0.14  | 898  |
| 635  | quercetin             | 12 µM  | HL60 | 0 | 0.055 | 0.129 | 2499 |
| 21   | genistein             | 1 µM   | MCF7 | 0 | 0.055 | 0.217 | 268  |
| 612  | sulfaguanidine        | 19 µM  | HL60 | 0 | 0.055 | 0.136 | 1995 |

|      |                             |        |      |   |       |       |      |
|------|-----------------------------|--------|------|---|-------|-------|------|
| 634  | cisapride                   | 9 µM   | HL60 | 0 | 0.055 | 0.139 | 2443 |
| 671  | ifosfamide                  | 15 µM  | MCF7 | 0 | 0.055 | 0.168 | 3485 |
| 610  | metronidazole               | 23 µM  | PC3  | 0 | 0.055 | 0.128 | 1921 |
| 614  | nomifensine                 | 11 µM  | HL60 | 0 | 0.055 | 0.165 | 1378 |
| 681  | benzamil                    | 11 µM  | PC3  | 0 | 0.054 | 0.107 | 3738 |
| 703  | tolbutamide                 | 15 µM  | PC3  | 0 | 0.054 | 0.107 | 4540 |
| 41   | raloxifene                  | 100 nM | HL60 | 0 | 0.054 | 0.104 | 388  |
| 632  | sulfaguanidine              | 19 µM  | MCF7 | 0 | 0.054 | 0.153 | 1495 |
| 650  | LY-294002                   | 100 nM | HL60 | 0 | 0.054 | 0.151 | 2676 |
| 756  | articaïne                   | 12 µM  | MCF7 | 0 | 0.054 | 0.092 | 6517 |
| 1015 | PF-00539745-00              | 10 µM  | PC3  | 0 | 0.054 | 0.106 | 5979 |
| 1062 | AG-012559                   | 10 µM  | PC3  | 0 | 0.054 | 0.159 | 6920 |
| 640  | dosulepin                   | 12 µM  | HL60 | 0 | 0.054 | 0.155 | 1713 |
| 713  | aciclovir                   | 18 µM  | PC3  | 0 | 0.053 | 0.176 | 4683 |
| 670  | merbromin                   | 5 µM   | MCF7 | 0 | 0.053 | 0.25  | 3439 |
| 719  | oxolinic acid               | 15 µM  | PC3  | 0 | 0.053 | 0.128 | 5094 |
| 754  | sulfacetamide               | 16 µM  | PC3  | 0 | 0.053 | 0.129 | 6349 |
| 651  | vidarabine                  | 15 µM  | HL60 | 0 | 0.053 | 0.1   | 2706 |
| 670  | cefamandole                 | 8 µM   | MCF7 | 0 | 0.053 | 0.139 | 3436 |
| 514  | yohimbine                   | 23 µM  | MCF7 | 0 | 0.053 | 0.156 | 1119 |
| 731  | gallamine triethiodide      | 4 µM   | PC3  | 0 | 0.052 | 0.126 | 5735 |
| 614  | acetylsalicylsalicylic acid | 13 µM  | HL60 | 0 | 0.052 | 0.148 | 1377 |
| 614  | isoniazid                   | 29 µM  | HL60 | 0 | 0.052 | 0.147 | 1399 |
| 693  | SR-95531                    | 11 µM  | PC3  | 0 | 0.052 | 0.098 | 4236 |
| 22a  | fludrocortisone             | 1 µM   | MCF7 | 0 | 0.052 | 0.147 | 281  |
| 613  | haloperidol                 | 11 µM  | HL60 | 0 | 0.052 | 0.16  | 2039 |
| 640  | sulfasalazine               | 10 µM  | HL60 | 0 | 0.051 | 0.103 | 1733 |
| 635  | etifenin                    | 12 µM  | HL60 | 0 | 0.051 | 0.12  | 2477 |
| 75   | monorden                    | 100 nM | HL60 | 0 | 0.051 | 0.176 | 544  |
| 747  | terazosin                   | 9 µM   | MCF7 | 0 | 0.051 | 0.206 | 7187 |
| 641  | quipazine                   | 9 µM   | HL60 | 0 | 0.051 | 0.125 | 1789 |
| 656  | pregnenolone                | 13 µM  | MCF7 | 0 | 0.051 | 0.151 | 2856 |
| 771  | niflumic acid               | 14 µM  | MCF7 | 0 | 0.051 | 0.131 | 7430 |
| 709  | pyrazinamide                | 32 µM  | PC3  | 0 | 0.051 | 0.099 | 6617 |
| 731  | chloropyrazine              | 35 µM  | PC3  | 0 | 0.051 | 0.133 | 5750 |
| 650  | haloperidol                 | 10 µM  | HL60 | 0 | 0.051 | 0.159 | 2663 |
| 616  | aminophenazone              | 17 µM  | PC3  | 0 | 0.05  | 0.114 | 2060 |



|      |                       |       |      |   |       |       |      |
|------|-----------------------|-------|------|---|-------|-------|------|
| 753  | prazosin              | 10 µM | PC3  | 0 | 0.05  | 0.178 | 6315 |
| 1027 | orlistat              | 10 µM | PC3  | 0 | 0.05  | 0.184 | 6420 |
| 761  | clorsulon             | 11 µM | PC3  | 0 | 0.05  | 0.175 | 7264 |
| 658  | benzthiazide          | 9 µM  | HL60 | 0 | 0.05  | 0.179 | 2989 |
| 660  | idazoxan              | 17 µM | HL60 | 0 | 0.05  | 0.192 | 3088 |
| 665  | pivmecillinam         | 8 µM  | HL60 | 0 | 0.05  | 0.134 | 2973 |
| 734  | bucladesine           | 8 µM  | PC3  | 0 | 0.05  | 0.106 | 5886 |
| 693  | orciprenaline         | 8 µM  | PC3  | 0 | 0.05  | 0.082 | 4248 |
| 1095 | meteneprost           | 10 µM | PC3  | 0 | 0.049 | 0.141 | 7557 |
| 631  | piperine              | 14 µM | HL60 | 0 | 0.049 | 0.158 | 1327 |
| 689  | tenoxicam             | 12 µM | PC3  | 0 | 0.049 | 0.176 | 4102 |
| 612  | hydrochlorothiazide   | 13 µM | HL60 | 0 | 0.049 | 0.115 | 1987 |
| 718  | isometheptene         | 8 µM  | PC3  | 0 | 0.049 | 0.15  | 5082 |
| 753  | cefoperazone          | 6 µM  | PC3  | 0 | 0.049 | 0.156 | 6323 |
| 725  | wortmannin            | 10 nM | MCF7 | 0 | 0.049 | 0.192 | 5240 |
| 610  | hexamethonium bromide | 10 µM | PC3  | 0 | 0.049 | 0.116 | 1901 |
| 648  | naproxen              | 16 µM | HL60 | 0 | 0.048 | 0.132 | 2533 |
| 698  | atractyloside         | 5 µM  | PC3  | 0 | 0.048 | 0.153 | 7393 |
| 733  | sulfamonomethoxine    | 14 µM | PC3  | 0 | 0.048 | 0.189 | 5843 |
| 709  | khellin               | 15 µM | PC3  | 0 | 0.048 | 0.2   | 6641 |
| 22a  | fludrocortisone       | 1 µM  | MCF7 | 0 | 0.048 | 0.142 | 282  |
| 702  | ethoxyquin            | 18 µM | PC3  | 0 | 0.048 | 0.118 | 4321 |
| 633  | hydroxyzine           | 9 µM  | MCF7 | 0 | 0.047 | 0.162 | 1524 |
| 614  | neomycin              | 4 µM  | HL60 | 0 | 0.047 | 0.152 | 1383 |
| 614  | thiopropazine         | 6 µM  | HL60 | 0 | 0.047 | 0.112 | 1390 |
| 709  | cefaclor              | 10 µM | PC3  | 0 | 0.047 | 0.098 | 6622 |
| 658  | tolmetin              | 13 µM | HL60 | 0 | 0.047 | 0.196 | 3009 |
| 741  | triamterene           | 16 µM | MCF7 | 0 | 0.047 | 0.14  | 6010 |
| 649  | merbromin             | 5 µM  | HL60 | 0 | 0.046 | 0.21  | 2577 |
| 635  | colistin              | 3 µM  | HL60 | 0 | 0.046 | 0.189 | 2491 |
| 631  | SR-95639A             | 10 µM | HL60 | 0 | 0.046 | 0.238 | 1336 |
| 635  | nystatin              | 4 µM  | HL60 | 0 | 0.046 | 0.213 | 2500 |
| 40   | genistein             | 10 µM | MCF7 | 0 | 0.046 | 0.075 | 382  |
| 714  | florfenicol           | 11 µM | PC3  | 0 | 0.046 | 0.107 | 6701 |
| 613  | josamycin             | 5 µM  | HL60 | 0 | 0.046 | 0.118 | 2034 |
| 751  | foliosidine           | 13 µM | MCF7 | 0 | 0.046 | 0.155 | 6057 |
| 645  | chlorcyclizine        | 12 µM | HL60 | 0 | 0.046 | 0.189 | 2197 |

|      |                     |        |      |   |        |        |      |
|------|---------------------|--------|------|---|--------|--------|------|
| 612  | minoxidil           | 19 µM  | HL60 | 0 | 0.045  | 0.157  | 1996 |
| 631  | dl-alpha tocopherol | 9 µM   | HL60 | 0 | 0.045  | 0.211  | 1320 |
| 699  | calcium folinate    | 8 µM   | MCF7 | 0 | 0.045  | 0.199  | 4725 |
| 602  | rosiglitazone       | 10 µM  | HL60 | 0 | 0.045  | 0.179  | 1174 |
| 631  | cyclobenzaprine     | 13 µM  | HL60 | 0 | 0.045  | 0.178  | 1332 |
| 650  | sirolimus           | 100 nM | HL60 | 0 | 0.045  | 0.17   | 2702 |
| 712  | ritodrine           | 12 µM  | PC3  | 0 | 0.044  | 0.113  | 4619 |
| 634  | pilocarpine         | 15 µM  | HL60 | 0 | 0.044  | 0.129  | 2438 |
| 713  | clofazimine         | 8 µM   | PC3  | 0 | 0.044  | 0.167  | 4682 |
| 731  | cefepime            | 7 µM   | PC3  | 0 | 0.044  | 0.144  | 5761 |
| 615  | iproniazid          | 14 µM  | HL60 | 0 | 0.044  | 0.151  | 1442 |
| 616  | ampyrone            | 20 µM  | PC3  | 0 | 0.043  | 0.209  | 2086 |
| 618  | nalidixic acid      | 15 µM  | HL60 | 0 | 0.043  | 0.208  | 2336 |
| 640  | piracetam           | 28 µM  | HL60 | 0 | 0.043  | 0.142  | 1710 |
| 714  | debrisoquine        | 9 µM   | PC3  | 0 | 0.043  | 0.148  | 6688 |
| 704  | 3-acetamidocoumarin | 20 µM  | PC3  | 0 | 0.042  | 0.203  | 4601 |
| 650  | estradiol           | 100 nM | HL60 | 0 | 0.042  | 0.143  | 2668 |
| 602  | estradiol           | 100 nM | HL60 | 0 | 0.04   | 0.159  | 1149 |
| 21   | genistein           | 1 µM   | MCF7 | 0 | 0.04   | 0.137  | 267  |
| 610  | 4-hydroxyphenazone  | 20 µM  | PC3  | 0 | 0.04   | 0.097  | 1915 |
| 58   | copper sulfate      | 100 µM | MCF7 | 0 | 0.04   | 0.153  | 438  |
| 681  | metoclopramide      | 12 µM  | PC3  | 0 | 0.04   | 0.196  | 3728 |
| 633  | aciclovir           | 18 µM  | MCF7 | 0 | 0.039  | 0.165  | 1543 |
| 650  | rosiglitazone       | 10 µM  | HL60 | 0 | 0.039  | 0.172  | 2693 |
| 623  | kanamycin           | 7 µM   | HL60 | 0 | 0.039  | 0.129  | 1609 |
| 735  | baclofen            | 19 µM  | MCF7 | 0 | 0.038  | 0.149  | 5414 |
| 611  | ciprofloxacin       | 11 µM  | PC3  | 0 | 0.038  | 0.156  | 1939 |
| 728  | kinetin             | 19 µM  | PC3  | 0 | 0.037  | 0.117  | 4477 |
| 704  | ioctamic acid       | 7 µM   | PC3  | 0 | 0.035  | 0.188  | 4600 |
| 649  | atractyloside       | 5 µM   | HL60 | 0 | 0.034  | 0.217  | 2573 |
| 603  | estradiol           | 10 nM  | PC3  | 0 | 0.034  | 0.154  | 1241 |
| 1058 | PF-00562151-00      | 10 µM  | PC3  | 0 | 0.033  | 0.111  | 6907 |
| 661  | gliquidone          | 8 µM   | HL60 | 0 | 0.032  | 0.193  | 3126 |
| 680  | calcium folinate    | 8 µM   | PC3  | 0 | 0.032  | 0.099  | 3703 |
| 613  | metanephrine        | 17 µM  | HL60 | 0 | 0.032  | 0.154  | 2015 |
| 634  | metixene            | 12 µM  | HL60 | 0 | -0.031 | -0.149 | 2451 |
| 622  | antazoline          | 13 µM  | HL60 | 0 | -0.034 | -0.142 | 1556 |

|      |                    |        |        |   |        |        |      |
|------|--------------------|--------|--------|---|--------|--------|------|
| 635  | cefaclor           | 10 µM  | HL60   | 0 | -0.035 | -0.234 | 2483 |
| 614  | aminophenazone     | 17 µM  | HL60   | 0 | -0.036 | -0.121 | 1376 |
| 751  | acacetin           | 14 µM  | MCF7   | 0 | -0.036 | -0.2   | 6044 |
| 611  | danazol            | 12 µM  | PC3    | 0 | -0.036 | -0.169 | 1954 |
| 702  | promazine          | 12 µM  | PC3    | 0 | -0.036 | -0.219 | 4308 |
| 611  | aciclovir          | 18 µM  | PC3    | 0 | -0.038 | -0.111 | 1960 |
| 703  | alpha-ergocryptine | 7 µM   | PC3    | 0 | -0.038 | -0.199 | 4552 |
| 670  | medrysone          | 12 µM  | MCF7   | 0 | -0.038 | -0.232 | 3403 |
| 63   | deferoxamine       | 100 µM | PC3    | 0 | -0.038 | -0.198 | 460  |
| 710  | methotrexate       | 9 µM   | PC3    | 0 | -0.038 | -0.248 | 6654 |
| 611  | diltiazem          | 9 µM   | PC3    | 0 | -0.038 | -0.201 | 1948 |
| 710  | sulconazole        | 9 µM   | PC3    | 0 | -0.039 | -0.206 | 6652 |
| 651  | sulfametoxydiazine | 14 µM  | HL60   | 0 | -0.039 | -0.195 | 2712 |
| 730  | zidovudine         | 15 µM  | MCF7   | 0 | -0.039 | -0.252 | 5333 |
| 631  | betulinic acid     | 9 µM   | HL60   | 0 | -0.04  | -0.136 | 1345 |
| 502  | 5252917            | 14 µM  | MCF7   | 0 | -0.04  | -0.149 | 944  |
| 1002 | rotenone           | 1 µM   | MCF7   | 0 | -0.04  | -0.123 | 5915 |
| 660  | (-)-MK-801         | 12 µM  | HL60   | 0 | -0.04  | -0.155 | 3081 |
| 46   | haloperidol        | 10 µM  | MCF7   | 0 | -0.04  | -0.188 | 418  |
| 615  | chlorphenesin      | 16 µM  | HL60   | 0 | -0.04  | -0.154 | 1432 |
| 617  | xylometazoline     | 14 µM  | PC3    | 0 | -0.04  | -0.224 | 2107 |
| 611  | glipizide          | 9 µM   | PC3    | 0 | -0.04  | -0.148 | 1926 |
| 711  | ethisterone        | 13 µM  | MCF7   | 0 | -0.04  | -0.146 | 3975 |
| 74   | fulvestrant        | 1 µM   | ssMCF7 | 0 | -0.041 | -0.175 | 523  |
| 680  | Prestwick-685      | 11 µM  | PC3    | 0 | -0.041 | -0.182 | 3683 |
| 714  | methylergometrine  | 9 µM   | PC3    | 0 | -0.041 | -0.165 | 6704 |
| 689  | trimethadione      | 28 µM  | PC3    | 0 | -0.041 | -0.107 | 4086 |
| 622  | tremorine          | 15 µM  | HL60   | 0 | -0.041 | -0.229 | 1579 |
| 612  | troleandomycin     | 5 µM   | HL60   | 0 | -0.041 | -0.178 | 1965 |
| 612  | naphazoline        | 16 µM  | HL60   | 0 | -0.041 | -0.113 | 1966 |
| 766  | asiaticoside       | 4 µM   | MCF7   | 0 | -0.041 | -0.236 | 7004 |
| 680  | mebendazole        | 14 µM  | PC3    | 0 | -0.041 | -0.22  | 3671 |
| 46   | chlorpromazine     | 10 µM  | MCF7   | 0 | -0.041 | -0.2   | 419  |
| 693  | gibberellic acid   | 12 µM  | PC3    | 0 | -0.041 | -0.128 | 4234 |
| 689  | myricetin          | 13 µM  | PC3    | 0 | -0.042 | -0.216 | 4090 |
| 42   | wortmannin         | 10 nM  | ssMCF7 | 0 | -0.042 | -0.159 | 404  |
| 698  | nitrofurantoin     | 17 µM  | PC3    | 0 | -0.042 | -0.114 | 7373 |

|     |                             |       |      |   |        |        |      |
|-----|-----------------------------|-------|------|---|--------|--------|------|
| 622 | fipexide                    | 9 µM  | HL60 | 0 | -0.042 | -0.157 | 1560 |
| 634 | progesterone                | 13 µM | HL60 | 0 | -0.042 | -0.11  | 2426 |
| 709 | lysergol                    | 16 µM | PC3  | 0 | -0.042 | -0.15  | 6621 |
| 514 | 3-hydroxy-DL-kynurenine     | 9 µM  | MCF7 | 0 | -0.042 | -0.181 | 1109 |
| 630 | bisoprolol                  | 9 µM  | HL60 | 0 | -0.042 | -0.198 | 1287 |
| 710 | famotidine                  | 12 µM | PC3  | 0 | -0.042 | -0.23  | 6665 |
| 766 | naftifine                   | 12 µM | MCF7 | 0 | -0.042 | -0.138 | 7032 |
| 730 | hesperetin                  | 13 µM | MCF7 | 0 | -0.042 | -0.239 | 5350 |
| 635 | pentamidine                 | 7 µM  | HL60 | 0 | -0.043 | -0.249 | 2473 |
| 658 | trichlormethiazide          | 11 µM | HL60 | 0 | -0.043 | -0.246 | 2998 |
| 659 | esculin                     | 12 µM | HL60 | 0 | -0.043 | -0.206 | 3052 |
| 693 | 7-aminocephalosporanic acid | 15 µM | PC3  | 0 | -0.043 | -0.095 | 4242 |
| 720 | chlorcyclizine              | 12 µM | MCF7 | 0 | -0.043 | -0.163 | 4367 |
| 670 | levonorgestrel              | 13 µM | MCF7 | 0 | -0.043 | -0.181 | 3406 |
| 634 | biotin                      | 16 µM | HL60 | 0 | -0.044 | -0.208 | 2428 |
| 704 | cefixime                    | 9 µM  | PC3  | 0 | -0.044 | -0.196 | 4567 |
| 634 | meclozine                   | 9 µM  | HL60 | 0 | -0.044 | -0.225 | 2424 |
| 660 | dioxybenzone                | 16 µM | HL60 | 0 | -0.044 | -0.254 | 3101 |
| 714 | dexibuprofen                | 19 µM | PC3  | 0 | -0.044 | -0.129 | 6712 |
| 713 | butyl hydroxybenzoate       | 21 µM | PC3  | 0 | -0.044 | -0.256 | 4647 |
| 680 | 0175029-0000                | 1 µM  | PC3  | 0 | -0.044 | -0.205 | 3694 |
| 632 | oxetacaine                  | 9 µM  | MCF7 | 0 | -0.044 | -0.187 | 1484 |
| 658 | levobunolol                 | 12 µM | HL60 | 0 | -0.044 | -0.091 | 3015 |
| 623 | betaxolol                   | 12 µM | HL60 | 0 | -0.044 | -0.111 | 1592 |
| 617 | etodolac                    | 14 µM | PC3  | 0 | -0.044 | -0.112 | 2091 |
| 622 | amodiaquine                 | 9 µM  | HL60 | 0 | -0.044 | -0.137 | 1570 |
| 709 | Prestwick-682               | 6 µM  | PC3  | 0 | -0.045 | -0.13  | 6638 |
| 611 | zimeldine                   | 10 µM | PC3  | 0 | -0.045 | -0.13  | 1930 |
| 762 | norfloxacin                 | 13 µM | PC3  | 0 | -0.045 | -0.213 | 7283 |
| 762 | nifedipine                  | 12 µM | PC3  | 0 | -0.045 | -0.218 | 7303 |
| 688 | boldine                     | 12 µM | PC3  | 0 | -0.045 | -0.122 | 4004 |
| 764 | pimozide                    | 9 µM  | PC3  | 0 | -0.045 | -0.195 | 7132 |
| 614 | nalbuphine                  | 10 µM | HL60 | 0 | -0.045 | -0.155 | 1379 |
| 701 | cloperastine                | 11 µM | PC3  | 0 | -0.045 | -0.182 | 4271 |
| 762 | nortriptyline               | 13 µM | PC3  | 0 | -0.045 | -0.239 | 7300 |
| 703 | Prestwick-1100              | 9 µM  | PC3  | 0 | -0.045 | -0.091 | 4534 |
| 614 | diazoxide                   | 17 µM | HL60 | 0 | -0.045 | -0.135 | 1368 |

|     |                             |       |      |   |        |        |      |
|-----|-----------------------------|-------|------|---|--------|--------|------|
| 653 | tacrine                     | 16 µM | MCF7 | 0 | -0.045 | -0.169 | 2633 |
| 693 | nifuroxazide                | 15 µM | PC3  | 0 | -0.045 | -0.133 | 4253 |
| 613 | midecamycin                 | 5 µM  | HL60 | 0 | -0.046 | -0.153 | 2026 |
| 613 | zimeldine                   | 10 µM | HL60 | 0 | -0.046 | -0.15  | 2012 |
| 611 | haloperidol                 | 11 µM | PC3  | 0 | -0.046 | -0.121 | 1955 |
| 733 | ipratropium bromide         | 10 µM | PC3  | 0 | -0.046 | -0.156 | 5823 |
| 611 | naloxone                    | 11 µM | PC3  | 0 | -0.046 | -0.165 | 1924 |
| 699 | alexidine                   | 7 µM  | MCF7 | 0 | -0.046 | -0.158 | 4721 |
| 659 | profenamine                 | 11 µM | HL60 | 0 | -0.046 | -0.232 | 3038 |
| 710 | doxazosin                   | 7 µM  | PC3  | 0 | -0.046 | -0.194 | 6642 |
| 682 | methylbenzethonium chloride | 9 µM  | PC3  | 0 | -0.046 | -0.222 | 3768 |
| 665 | levocabastine               | 9 µM  | HL60 | 0 | -0.046 | -0.262 | 2948 |
| 682 | PHA-00851261E               | 1 µM  | PC3  | 0 | -0.046 | -0.09  | 3776 |
| 680 | fludroxycortide             | 9 µM  | PC3  | 0 | -0.046 | -0.111 | 3679 |
| 650 | chlorpromazine              | 1 µM  | HL60 | 0 | -0.047 | -0.206 | 2677 |
| 603 | haloperidol                 | 10 µM | PC3  | 0 | -0.047 | -0.217 | 1203 |
| 731 | raloxifene                  | 8 µM  | PC3  | 0 | -0.047 | -0.181 | 5759 |
| 670 | flecainide                  | 8 µM  | MCF7 | 0 | -0.047 | -0.152 | 3418 |
| 682 | mexiletine                  | 19 µM | PC3  | 0 | -0.047 | -0.086 | 3781 |
| 734 | corbadrine                  | 22 µM | PC3  | 0 | -0.047 | -0.18  | 5854 |
| 513 | fulvestrant                 | 10 nM | MCF7 | 0 | -0.047 | -0.18  | 1076 |
| 603 | troglitazone                | 10 µM | PC3  | 0 | -0.047 | -0.132 | 1232 |
| 710 | hydroxyzine                 | 9 µM  | PC3  | 0 | -0.047 | -0.155 | 6660 |
| 654 | cefadroxil                  | 11 µM | MCF7 | 0 | -0.047 | -0.148 | 3259 |
| 630 | benfluorex                  | 10 µM | HL60 | 0 | -0.047 | -0.213 | 1266 |
| 703 | phenelzine                  | 17 µM | PC3  | 0 | -0.047 | -0.133 | 4538 |
| 752 | butirosin                   | 5 µM  | MCF7 | 0 | -0.047 | -0.158 | 6080 |
| 757 | LY-294002                   | 10 µM | MCF7 | 0 | -0.048 | -0.178 | 5596 |
| 714 | hesperidin                  | 7 µM  | PC3  | 0 | -0.048 | -0.188 | 6714 |
| 653 | dextromethorphan            | 11 µM | MCF7 | 0 | -0.048 | -0.208 | 2636 |
| 701 | metoclopramide              | 12 µM | PC3  | 0 | -0.048 | -0.204 | 4285 |
| 612 | amiloride                   | 13 µM | HL60 | 0 | -0.048 | -0.124 | 1970 |
| 730 | cyproheptadine              | 12 µM | MCF7 | 0 | -0.048 | -0.208 | 5340 |
| 37  | rofecoxib                   | 10 µM | HL60 | 0 | -0.048 | -0.155 | 371  |
| 681 | 0179445-0000                | 10 µM | PC3  | 0 | -0.048 | -0.11  | 3733 |
| 611 | methotrexate                | 9 µM  | PC3  | 0 | -0.048 | -0.146 | 1957 |
| 632 | amiloride                   | 13 µM | MCF7 | 0 | -0.048 | -0.161 | 1470 |

|      |                       |        |      |   |        |        |      |
|------|-----------------------|--------|------|---|--------|--------|------|
| 644  | succinylsulfathiazole | 11 µM  | HL60 | 0 | -0.048 | -0.258 | 2166 |
| 685  | heliotrine            | 13 µM  | MCF7 | 0 | -0.048 | -0.128 | 3615 |
| 659  | paracetamol           | 26 µM  | HL60 | 0 | -0.048 | -0.199 | 3025 |
| 736  | ranitidine            | 11 µM  | MCF7 | 0 | -0.048 | -0.146 | 5425 |
| 767  | acetylsalicylic acid  | 100 µM | MCF7 | 0 | -0.049 | -0.183 | 6924 |
| 640  | Prestwick-559         | 8 µM   | HL60 | 0 | -0.049 | -0.161 | 1728 |
| 681  | lomefloxacin          | 10 µM  | PC3  | 0 | -0.049 | -0.159 | 3723 |
| 640  | imipenem              | 13 µM  | HL60 | 0 | -0.049 | -0.181 | 1724 |
| 514  | tyrphostin AG-825     | 25 µM  | MCF7 | 0 | -0.049 | -0.25  | 1114 |
| 745  | sulfametoxydiazine    | 14 µM  | MCF7 | 0 | -0.049 | -0.218 | 6212 |
| 612  | amylocaine            | 15 µM  | HL60 | 0 | -0.049 | -0.139 | 1991 |
| 631  | pepstatin             | 6 µM   | HL60 | 0 | -0.049 | -0.148 | 1328 |
| 663  | rescinnamine          | 6 µM   | MCF7 | 0 | -0.049 | -0.253 | 2785 |
| 615  | oxymetazoline         | 13 µM  | HL60 | 0 | -0.049 | -0.125 | 1431 |
| 761  | talampicillin         | 8 µM   | PC3  | 0 | -0.049 | -0.147 | 7254 |
| 688  | 6-azathymine          | 31 µM  | PC3  | 0 | -0.049 | -0.132 | 3987 |
| 502  | 5248896               | 11 µM  | MCF7 | 0 | -0.049 | -0.217 | 955  |
| 615  | scopolamine N-oxide   | 10 µM  | HL60 | 0 | -0.049 | -0.161 | 1415 |
| 710  | progesterone          | 13 µM  | PC3  | 0 | -0.049 | -0.16  | 6646 |
| 630  | testosterone          | 12 µM  | HL60 | 0 | -0.049 | -0.143 | 1295 |
| 637  | antimycin A           | 7 µM   | MCF7 | 0 | -0.049 | -0.207 | 2261 |
| 649  | guaifenesin           | 20 µM  | HL60 | 0 | -0.049 | -0.162 | 2569 |
| 1030 | AG-013608             | 10 µM  | MCF7 | 0 | -0.049 | -0.103 | 6435 |
| 659  | monobenzene           | 20 µM  | HL60 | 0 | -0.05  | -0.13  | 3054 |
| 1017 | 3-nitropropionic acid | 10 µM  | PC3  | 0 | -0.05  | -0.077 | 6372 |
| 615  | pentetrazol           | 29 µM  | HL60 | 0 | -0.05  | -0.142 | 1408 |
| 616  | atropine oxide        | 12 µM  | PC3  | 0 | -0.05  | -0.13  | 2054 |
| 611  | paclitaxel            | 5 µM   | PC3  | 0 | -0.05  | -0.153 | 1959 |
| 766  | flunarizine           | 8 µM   | MCF7 | 0 | -0.05  | -0.219 | 7013 |
| 737  | torasemide            | 11 µM  | MCF7 | 0 | -0.05  | -0.096 | 5476 |
| 634  | trichostatin A        | 100 nM | HL60 | 0 | -0.05  | -0.137 | 2450 |
| 753  | paracetamol           | 26 µM  | PC3  | 0 | -0.05  | -0.181 | 6284 |
| 626  | haloperidol           | 10 µM  | MCF7 | 0 | -0.05  | -0.155 | 1628 |
| 735  | ascorbic acid         | 22 µM  | MCF7 | 0 | -0.05  | -0.106 | 5407 |
| 631  | lysergol              | 16 µM  | HL60 | 0 | -0.051 | -0.165 | 1325 |
| 665  | Prestwick-1083        | 9 µM   | HL60 | 0 | -0.051 | -0.254 | 2976 |
| 710  | glipizide             | 9 µM   | PC3  | 0 | -0.051 | -0.135 | 6645 |

|     |                             |        |      |   |        |        |      |
|-----|-----------------------------|--------|------|---|--------|--------|------|
| 619 | doxepin                     | 13 µM  | HL60 | 0 | -0.051 | -0.168 | 2384 |
| 750 | chlorpromazine              | 1 µM   | HL60 | 0 | -0.051 | -0.208 | 6176 |
| 693 | phenazone                   | 21 µM  | PC3  | 0 | -0.051 | -0.093 | 4251 |
| 677 | tridihexethyl               | 11 µM  | MCF7 | 0 | -0.051 | -0.132 | 3526 |
| 660 | cantharidin                 | 20 µM  | HL60 | 0 | -0.051 | -0.218 | 3075 |
| 703 | citalopram                  | 1 µM   | PC3  | 0 | -0.051 | -0.099 | 4555 |
| 17  | tretinoin                   | 1 µM   | MCF7 | 0 | -0.051 | -0.102 | 224  |
| 726 | naloxone                    | 11 µM  | MCF7 | 0 | -0.051 | -0.2   | 5243 |
| 656 | pyrazinamide                | 32 µM  | MCF7 | 0 | -0.051 | -0.121 | 2839 |
| 630 | zoxazolamine                | 24 µM  | HL60 | 0 | -0.051 | -0.178 | 1270 |
| 749 | benzylpenicillin            | 11 µM  | HL60 | 0 | -0.051 | -0.246 | 6155 |
| 734 | praziquantel                | 13 µM  | PC3  | 0 | -0.051 | -0.112 | 5874 |
| 659 | fluvastatin                 | 9 µM   | HL60 | 0 | -0.051 | -0.237 | 3032 |
| 619 | dropropizine                | 17 µM  | HL60 | 0 | -0.051 | -0.178 | 2398 |
| 622 | ketotifen                   | 9 µM   | HL60 | 0 | -0.051 | -0.189 | 1583 |
| 728 | napelline                   | 11 µM  | PC3  | 0 | -0.051 | -0.171 | 4486 |
| 622 | mebeverine                  | 9 µM   | HL60 | 0 | -0.051 | -0.14  | 1576 |
| 660 | pipemidic acid              | 13 µM  | HL60 | 0 | -0.051 | -0.233 | 3093 |
| 663 | solanine                    | 5 µM   | MCF7 | 0 | -0.051 | -0.243 | 2808 |
| 683 | fenbendazole                | 13 µM  | PC3  | 0 | -0.051 | -0.212 | 3805 |
| 693 | doxylamine                  | 10 µM  | PC3  | 0 | -0.052 | -0.099 | 4235 |
| 758 | aciclovir                   | 18 µM  | MCF7 | 0 | -0.052 | -0.096 | 5643 |
| 713 | clioquinol                  | 13 µM  | PC3  | 0 | -0.052 | -0.126 | 4663 |
| 634 | naringin                    | 7 µM   | HL60 | 0 | -0.052 | -0.253 | 2425 |
| 636 | thiopropazine               | 6 µM   | MCF7 | 0 | -0.052 | -0.149 | 2236 |
| 732 | quinidine                   | 11 µM  | PC3  | 0 | -0.052 | -0.127 | 5793 |
| 58  | W-13                        | 10 µM  | MCF7 | 0 | -0.052 | -0.106 | 440  |
| 758 | pentetic acid               | 10 µM  | MCF7 | 0 | -0.052 | -0.188 | 5629 |
| 710 | clomifene                   | 7 µM   | PC3  | 0 | -0.052 | -0.229 | 6648 |
| 713 | bephenium hydroxynaphthoate | 9 µM   | PC3  | 0 | -0.052 | -0.105 | 4668 |
| 116 | monastrol                   | 100 µM | PC3  | 0 | -0.052 | -0.185 | 668  |
| 612 | acebutolol                  | 11 µM  | HL60 | 0 | -0.052 | -0.192 | 1993 |
| 640 | chloroquine                 | 8 µM   | HL60 | 0 | -0.052 | -0.105 | 1719 |
| 676 | naftopidil                  | 9 µM   | MCF7 | 0 | -0.053 | -0.13  | 7331 |
| 54  | staurosporine               | 10 nM  | MCF7 | 0 | -0.053 | -0.103 | 425  |
| 504 | rottlerin                   | 10 µM  | MCF7 | 0 | -0.053 | -0.175 | 825  |
| 615 | ornidazole                  | 18 µM  | HL60 | 0 | -0.053 | -0.154 | 1425 |

|      |                             |        |      |   |        |        |      |
|------|-----------------------------|--------|------|---|--------|--------|------|
| 748  | vinpocetine                 | 11 µM  | MCF7 | 0 | -0.053 | -0.229 | 7213 |
| 758  | loperamide                  | 8 µM   | MCF7 | 0 | -0.053 | -0.107 | 5632 |
| 741  | hydrastine hydrochloride    | 10 µM  | MCF7 | 0 | -0.053 | -0.167 | 6011 |
| 610  | doxylamine                  | 10 µM  | PC3  | 0 | -0.053 | -0.116 | 1893 |
| 753  | nizatidine                  | 12 µM  | PC3  | 0 | -0.053 | -0.231 | 6305 |
| 1002 | thioridazine                | 10 µM  | MCF7 | 0 | -0.053 | -0.125 | 5916 |
| 754  | propafenone                 | 11 µM  | PC3  | 0 | -0.053 | -0.169 | 6336 |
| 623  | vanoxerine                  | 8 µM   | HL60 | 0 | -0.053 | -0.139 | 1625 |
| 1044 | AG-028671                   | 10 µM  | PC3  | 0 | -0.053 | -0.182 | 6582 |
| 1088 | pioglitazone                | 10 µM  | MCF7 | 0 | -0.053 | -0.136 | 7523 |
| 703  | tinidazole                  | 16 µM  | PC3  | 0 | -0.053 | -0.152 | 4548 |
| 62   | cobalt chloride             | 100 µM | MCF7 | 0 | -0.053 | -0.141 | 454  |
| 712  | tonzonium bromide           | 7 µM   | PC3  | 0 | -0.053 | -0.177 | 4617 |
| 623  | chlormezanone               | 15 µM  | HL60 | 0 | -0.053 | -0.173 | 1620 |
| 712  | Prestwick-860               | 35 µM  | PC3  | 0 | -0.053 | -0.146 | 4618 |
| 1032 | dinoprostone                | 10 µM  | PC3  | 0 | -0.054 | -0.131 | 6547 |
| 641  | dacarbazine                 | 22 µM  | HL60 | 0 | -0.054 | -0.231 | 1762 |
| 687  | paroxetine                  | 1 µM   | MCF7 | 0 | -0.054 | -0.182 | 3904 |
| 712  | bepidil                     | 10 µM  | PC3  | 0 | -0.054 | -0.22  | 4613 |
| 658  | reserpine                   | 7 µM   | HL60 | 0 | -0.054 | -0.243 | 3003 |
| 693  | R-atenolol                  | 15 µM  | PC3  | 0 | -0.054 | -0.215 | 4259 |
| 631  | 7-aminocephalosporanic acid | 15 µM  | HL60 | 0 | -0.054 | -0.2   | 1322 |
| 670  | sulfamethoxypyridazine      | 14 µM  | MCF7 | 0 | -0.054 | -0.206 | 3409 |
| 758  | phthalylsulfathiazole       | 10 µM  | MCF7 | 0 | -0.054 | -0.207 | 5614 |
| 750  | monorden                    | 100 nM | HL60 | 0 | -0.054 | -0.222 | 6178 |
| 755  | nitrendipine                | 11 µM  | MCF7 | 0 | -0.054 | -0.168 | 6464 |
| 651  | sulfamonomethoxine          | 14 µM  | HL60 | 0 | -0.054 | -0.167 | 2742 |
| 610  | cinchocaine                 | 12 µM  | PC3  | 0 | -0.054 | -0.14  | 1889 |
| 611  | apomorphine                 | 6 µM   | PC3  | 0 | -0.054 | -0.184 | 1923 |
| 683  | flutamide                   | 14 µM  | PC3  | 0 | -0.054 | -0.197 | 3803 |
| 54   | tanespimycin                | 1 µM   | MCF7 | 0 | -0.054 | -0.105 | 428  |
| 29   | felodipine                  | 10 µM  | MCF7 | 0 | -0.054 | -0.117 | 337  |
| 725  | LY-294002                   | 10 µM  | MCF7 | 0 | -0.054 | -0.115 | 5236 |
| 1001 | AG-013608                   | 10 µM  | PC3  | 0 | -0.054 | -0.212 | 5909 |
| 709  | Chicago Sky Blue 6B         | 4 µM   | PC3  | 0 | -0.054 | -0.107 | 6626 |
| 116  | estradiol                   | 10 nM  | PC3  | 0 | -0.054 | -0.161 | 665  |
| 661  | denatonium benzoate         | 9 µM   | HL60 | 0 | -0.054 | -0.257 | 3123 |



|      |                |        |        |   |        |        |      |
|------|----------------|--------|--------|---|--------|--------|------|
| 746  | hexestrol      | 15 µM  | MCF7   | 0 | -0.054 | -0.158 | 6252 |
| 1046 | 5194442        | 20 µM  | PC3    | 0 | -0.055 | -0.117 | 6594 |
| 747  | kaempferol     | 14 µM  | MCF7   | 0 | -0.055 | -0.147 | 7196 |
| 649  | flumetasone    | 10 µM  | HL60   | 0 | -0.055 | -0.162 | 2551 |
| 1034 | alprostadil    | 10 µM  | PC3    | 0 | -0.055 | -0.115 | 6555 |
| 714  | diltiazem      | 9 µM   | PC3    | 0 | -0.055 | -0.164 | 6710 |
| 765  | fulvestrant    | 10 nM  | MCF7   | 0 | -0.055 | -0.121 | 6997 |
| 728  | stachydrine    | 22 µM  | PC3    | 0 | -0.055 | -0.201 | 4469 |
| 1075 | MS-275         | 10 µM  | PC3    | 0 | -0.055 | -0.185 | 7084 |
| 728  | sertaconazole  | 8 µM   | PC3    | 0 | -0.055 | -0.209 | 4475 |
| 617  | ranitidine     | 11 µM  | PC3    | 0 | -0.055 | -0.237 | 2088 |
| 613  | paclitaxel     | 5 µM   | HL60   | 0 | -0.055 | -0.11  | 2043 |
| 693  | dydrogesterone | 13 µM  | PC3    | 0 | -0.055 | -0.094 | 4254 |
| 771  | indometacin    | 11 µM  | MCF7   | 0 | -0.055 | -0.22  | 7409 |
| 641  | stachydrine    | 22 µM  | HL60   | 0 | -0.055 | -0.14  | 1751 |
| 662  | piperlongumine | 13 µM  | MCF7   | 0 | -0.055 | -0.204 | 2757 |
| 755  | megestrol      | 10 µM  | MCF7   | 0 | -0.055 | -0.137 | 6468 |
| 615  | etodolac       | 14 µM  | HL60   | 0 | -0.055 | -0.157 | 1407 |
| 699  | mebendazole    | 14 µM  | MCF7   | 0 | -0.055 | -0.182 | 4694 |
| 699  | riluzole       | 15 µM  | MCF7   | 0 | -0.055 | -0.114 | 4689 |
| 702  | PHA-00851261E  | 10 µM  | PC3    | 0 | -0.055 | -0.155 | 4330 |
| 661  | protriptyline  | 13 µM  | HL60   | 0 | -0.055 | -0.267 | 3119 |
| 659  | crotamiton     | 20 µM  | HL60   | 0 | -0.056 | -0.218 | 3050 |
| 641  | cinchonidine   | 14 µM  | HL60   | 0 | -0.056 | -0.162 | 1780 |
| 712  | colchicine     | 10 µM  | PC3    | 0 | -0.056 | -0.166 | 4614 |
| 1057 | orlistat       | 10 µM  | MCF7   | 0 | -0.056 | -0.158 | 6905 |
| 659  | bemegride      | 26 µM  | HL60   | 0 | -0.056 | -0.228 | 3051 |
| 671  | drofenine      | 11 µM  | MCF7   | 0 | -0.056 | -0.263 | 3455 |
| 734  | gabapentin     | 23 µM  | PC3    | 0 | -0.056 | -0.133 | 5875 |
| 614  | triamcinolone  | 10 µM  | HL60   | 0 | -0.056 | -0.141 | 1395 |
| 69   | fluphenazine   | 10 µM  | SKMEL5 | 0 | -0.056 | -0.129 | 494  |
| 1011 | PF-00562151-00 | 10 µM  | PC3    | 0 | -0.056 | -0.16  | 5959 |
| 750  | fluphenazine   | 10 µM  | HL60   | 0 | -0.056 | -0.183 | 6196 |
| 659  | nicotinic acid | 32 µM  | HL60   | 0 | -0.056 | -0.208 | 3043 |
| 685  | demeclocycline | 8 µM   | MCF7   | 0 | -0.056 | -0.204 | 3604 |
| 727  | estradiol      | 100 nM | PC3    | 0 | -0.056 | -0.116 | 4432 |
| 629  | 8-azaguanine   | 26 µM  | HL60   | 0 | -0.056 | -0.212 | 1833 |

|      |                      |        |      |   |        |        |      |
|------|----------------------|--------|------|---|--------|--------|------|
| 764  | oxybutynin           | 10 µM  | PC3  | 0 | -0.056 | -0.186 | 7126 |
| 718  | trimetazidine        | 12 µM  | PC3  | 0 | -0.056 | -0.168 | 5060 |
| 766  | levocabastine        | 9 µM   | MCF7 | 0 | -0.057 | -0.215 | 7009 |
| 754  | benzonatate          | 7 µM   | PC3  | 0 | -0.057 | -0.193 | 6334 |
| 603  | acetylsalicylic acid | 100 µM | PC3  | 0 | -0.057 | -0.226 | 1204 |
| 772  | bacitracin           | 3 µM   | MCF7 | 0 | -0.057 | -0.148 | 7448 |
| 665  | iopanoic acid        | 7 µM   | HL60 | 0 | -0.057 | -0.249 | 2965 |
| 1089 | CP-645525-01         | 10 µM  | PC3  | 0 | -0.057 | -0.201 | 7527 |
| 703  | paroxetine           | 1 µM   | PC3  | 0 | -0.057 | -0.219 | 4556 |
| 645  | ethotoin             | 20 µM  | HL60 | 0 | -0.057 | -0.212 | 2196 |
| 708  | colchicine           | 10 µM  | MCF7 | 0 | -0.057 | -0.101 | 5675 |
| 633  | amoxapine            | 13 µM  | MCF7 | 0 | -0.057 | -0.126 | 1513 |
| 622  | methylprednisolone   | 11 µM  | HL60 | 0 | -0.057 | -0.181 | 1567 |
| 709  | liothyronine         | 6 µM   | PC3  | 0 | -0.057 | -0.171 | 6602 |
| 678  | benzylpenicillin     | 11 µM  | MCF7 | 0 | -0.057 | -0.125 | 3577 |
| 746  | tretinoin            | 13 µM  | MCF7 | 0 | -0.057 | -0.184 | 6243 |
| 714  | glycocholic acid     | 9 µM   | PC3  | 0 | -0.057 | -0.167 | 6716 |
| 504  | Y-27632              | 3 µM   | MCF7 | 0 | -0.058 | -0.164 | 832  |
| 1049 | PF-00562151-00       | 10 µM  | MCF7 | 0 | -0.058 | -0.215 | 6868 |
| 619  | telenzepine          | 9 µM   | HL60 | 0 | -0.058 | -0.214 | 2388 |
| 623  | hemicholinium        | 7 µM   | HL60 | 0 | -0.058 | -0.109 | 1601 |
| 731  | thiethylperazine     | 6 µM   | PC3  | 0 | -0.058 | -0.121 | 5756 |
| 651  | amrinone             | 21 µM  | HL60 | 0 | -0.058 | -0.188 | 2724 |
| 630  | dextromethorphan     | 11 µM  | HL60 | 0 | -0.058 | -0.258 | 1281 |
| 748  | corbadrine           | 22 µM  | MCF7 | 0 | -0.058 | -0.203 | 7208 |
| 738  | scoulerine           | 12 µM  | MCF7 | 0 | -0.058 | -0.168 | 5536 |
| 1029 | 0225151-0000         | 10 µM  | PC3  | 0 | -0.058 | -0.167 | 6426 |
| 635  | propylthiouracil     | 23 µM  | HL60 | 0 | -0.058 | -0.213 | 2476 |
| 618  | kawain               | 17 µM  | HL60 | 0 | -0.058 | -0.192 | 2337 |
| 626  | chlorpromazine       | 1 µM   | MCF7 | 0 | -0.058 | -0.222 | 1642 |
| 648  | Prestwick-689        | 10 µM  | HL60 | 0 | -0.058 | -0.189 | 2514 |
| 701  | benzamil             | 11 µM  | PC3  | 0 | -0.058 | -0.189 | 4294 |
| 713  | enoxacin             | 12 µM  | PC3  | 0 | -0.058 | -0.135 | 4655 |
| 75   | gefitinib            | 10 µM  | HL60 | 0 | -0.058 | -0.127 | 541  |
| 611  | lynestrenol          | 14 µM  | PC3  | 0 | -0.058 | -0.156 | 1953 |
| 761  | aceclofenac          | 11 µM  | PC3  | 0 | -0.058 | -0.173 | 7269 |
| 752  | etanidazole          | 19 µM  | MCF7 | 0 | -0.058 | -0.2   | 6072 |

|      |                           |        |      |   |        |        |      |
|------|---------------------------|--------|------|---|--------|--------|------|
| 755  | promethazine              | 12 µM  | MCF7 | 0 | -0.059 | -0.195 | 6477 |
| 631  | apigenin                  | 15 µM  | HL60 | 0 | -0.059 | -0.252 | 1321 |
| 659  | Prestwick-860             | 35 µM  | HL60 | 0 | -0.059 | -0.21  | 3040 |
| 612  | cinchocaine               | 12 µM  | HL60 | 0 | -0.059 | -0.117 | 1969 |
| 613  | hydroxyzine               | 9 µM   | HL60 | 0 | -0.059 | -0.179 | 2024 |
| 1044 | 6-bromoindirubin-3'-oxime | 500 nM | PC3  | 0 | -0.059 | -0.179 | 6585 |
| 727  | tanespimycin              | 1 µM   | PC3  | 0 | -0.059 | -0.183 | 4442 |
| 611  | chlortetracycline         | 8 µM   | PC3  | 0 | -0.059 | -0.147 | 1958 |
| 627  | imipramine                | 13 µM  | MCF7 | 0 | -0.059 | -0.214 | 1685 |
| 746  | saquinavir                | 5 µM   | MCF7 | 0 | -0.059 | -0.193 | 6246 |
| 701  | phenformin                | 17 µM  | PC3  | 0 | -0.059 | -0.121 | 4283 |
| 710  | etoposide                 | 7 µM   | PC3  | 0 | -0.059 | -0.097 | 6681 |
| 720  | lithocholic acid          | 11 µM  | MCF7 | 0 | -0.059 | -0.148 | 4373 |
| 745  | trioxysalen               | 18 µM  | MCF7 | 0 | -0.059 | -0.233 | 6216 |
| 635  | betahistine               | 17 µM  | HL60 | 0 | -0.059 | -0.209 | 2472 |
| 727  | sirolimus                 | 100 nM | PC3  | 0 | -0.059 | -0.192 | 4431 |
| 659  | capsaicin                 | 13 µM  | HL60 | 0 | -0.059 | -0.249 | 3034 |
| 613  | verapamil                 | 8 µM   | HL60 | 0 | -0.059 | -0.161 | 2009 |
| 660  | desoxycortone             | 12 µM  | HL60 | 0 | -0.059 | -0.253 | 3099 |
| 701  | 0179445-0000              | 10 µM  | PC3  | 0 | -0.059 | -0.161 | 4289 |
| 646  | mepacrine                 | 8 µM   | MCF7 | 0 | -0.059 | -0.207 | 3179 |
| 653  | procainamide              | 15 µM  | MCF7 | 0 | -0.059 | -0.194 | 2618 |
| 729  | apomorphine               | 6 µM   | MCF7 | 0 | -0.059 | -0.228 | 5283 |
| 617  | alverine                  | 8 µM   | PC3  | 0 | -0.059 | -0.184 | 2110 |
| 1053 | carmustine                | 100 µM | MCF7 | 0 | -0.059 | -0.138 | 6888 |
| 25   | N-phenylanthranilic acid  | 10 µM  | MCF7 | 0 | -0.059 | -0.134 | 317  |
| 641  | berberine                 | 11 µM  | HL60 | 0 | -0.059 | -0.151 | 1778 |
| 695  | SR-95531                  | 11 µM  | MCF7 | 0 | -0.059 | -0.253 | 4820 |
| 672  | amiprilose                | 12 µM  | MCF7 | 0 | -0.059 | -0.206 | 3339 |
| 610  | levodopa                  | 20 µM  | PC3  | 0 | -0.059 | -0.166 | 1892 |
| 1079 | colforsin                 | 500 nM | PC3  | 0 | -0.059 | -0.177 | 7104 |
| 665  | piribedil                 | 12 µM  | HL60 | 0 | -0.06  | -0.273 | 2951 |
| 62   | prochlorperazine          | 10 µM  | MCF7 | 0 | -0.06  | -0.132 | 455  |
| 1079 | 0198306-0000              | 10 µM  | PC3  | 0 | -0.06  | -0.177 | 7102 |
| 680  | alexidine                 | 7 µM   | PC3  | 0 | -0.06  | -0.161 | 3699 |
| 60   | diclofenac                | 10 µM  | PC3  | 0 | -0.06  | -0.159 | 445  |
| 632  | 4-hydroxyphenazone        | 20 µM  | MCF7 | 0 | -0.06  | -0.148 | 1497 |

|      |                           |        |      |   |        |        |      |
|------|---------------------------|--------|------|---|--------|--------|------|
| 711  | promazine                 | 12 µM  | MCF7 | 0 | -0.06  | -0.233 | 3927 |
| 661  | ketorolac                 | 11 µM  | HL60 | 0 | -0.06  | -0.167 | 3110 |
| 762  | tranlycypromine           | 24 µM  | PC3  | 0 | -0.06  | -0.223 | 7293 |
| 622  | bupropion                 | 14 µM  | HL60 | 0 | -0.06  | -0.195 | 1564 |
| 1    | metformin                 | 100 nM | MCF7 | 0 | -0.06  | -0.126 | 3    |
| 641  | atropine                  | 6 µM   | HL60 | 0 | -0.06  | -0.123 | 1768 |
| 646  | mifepristone              | 9 µM   | MCF7 | 0 | -0.06  | -0.227 | 3185 |
| 718  | dapsone                   | 16 µM  | PC3  | 0 | -0.06  | -0.21  | 5078 |
| 623  | debrisoquine              | 9 µM   | HL60 | 0 | -0.06  | -0.164 | 1591 |
| 665  | torasemide                | 11 µM  | HL60 | 0 | -0.06  | -0.255 | 2956 |
| 738  | depropine                 | 8 µM   | MCF7 | 0 | -0.06  | -0.134 | 5543 |
| 745  | dizocilpine               | 12 µM  | MCF7 | 0 | -0.06  | -0.223 | 6223 |
| 713  | sulfafurazole             | 15 µM  | PC3  | 0 | -0.06  | -0.091 | 4661 |
| 504  | tanespimycin              | 1 µM   | MCF7 | 0 | -0.06  | -0.167 | 831  |
| 632  | diflunisal                | 16 µM  | MCF7 | 0 | -0.06  | -0.185 | 1490 |
| 750  | alvespimycin              | 100 nM | HL60 | 0 | -0.06  | -0.245 | 6172 |
| 617  | fenspiride                | 13 µM  | PC3  | 0 | -0.06  | -0.15  | 2106 |
| 602  | fulvestrant               | 1 µM   | HL60 | 0 | -0.061 | -0.172 | 1146 |
| 628  | trichostatin A            | 100 nM | PC3  | 0 | -0.061 | -0.195 | 1793 |
| 1088 | CP-645525-01              | 10 µM  | MCF7 | 0 | -0.061 | -0.119 | 7522 |
| 623  | probucol                  | 8 µM   | HL60 | 0 | -0.061 | -0.139 | 1608 |
| 712  | bisacodyl                 | 11 µM  | PC3  | 0 | -0.061 | -0.165 | 4616 |
| 663  | trimethylcolchicinic acid | 12 µM  | MCF7 | 0 | -0.061 | -0.275 | 2802 |
| 703  | ethoin                    | 20 µM  | PC3  | 0 | -0.061 | -0.162 | 4545 |
| 752  | butamben                  | 21 µM  | MCF7 | 0 | -0.061 | -0.113 | 6093 |
| 1011 | estradiol                 | 10 nM  | PC3  | 0 | -0.061 | -0.088 | 5960 |
| 728  | acepromazine              | 9 µM   | PC3  | 0 | -0.061 | -0.154 | 4494 |
| 648  | skimmianine               | 15 µM  | HL60 | 0 | -0.061 | -0.22  | 2504 |
| 611  | perphenazine              | 10 µM  | PC3  | 0 | -0.061 | -0.218 | 1956 |
| 644  | quinisocaine              | 13 µM  | HL60 | 0 | -0.061 | -0.165 | 2151 |
| 710  | colecalfiferol            | 10 µM  | PC3  | 0 | -0.061 | -0.111 | 6656 |
| 614  | acenocoumarol             | 11 µM  | HL60 | 0 | -0.061 | -0.16  | 1394 |
| 753  | aminohippuric acid        | 21 µM  | PC3  | 0 | -0.061 | -0.216 | 6294 |
| 671  | amrinone                  | 21 µM  | MCF7 | 0 | -0.061 | -0.158 | 3465 |
| 86   | fisetin                   | 50 µM  | PC3  | 0 | -0.061 | -0.216 | 579  |
| 502  | 5230742                   | 17 µM  | MCF7 | 0 | -0.061 | -0.162 | 970  |
| 735  | zoxazolamine              | 24 µM  | MCF7 | 0 | -0.062 | -0.204 | 5390 |

|      |                    |        |      |   |        |        |      |
|------|--------------------|--------|------|---|--------|--------|------|
| 764  | berberine          | 11 µM  | PC3  | 0 | -0.062 | -0.149 | 7143 |
| 671  | cromoglicic acid   | 8 µM   | MCF7 | 0 | -0.062 | -0.124 | 3475 |
| 708  | hycanthone         | 11 µM  | MCF7 | 0 | -0.062 | -0.211 | 5691 |
| 617  | methocarbamol      | 17 µM  | PC3  | 0 | -0.062 | -0.194 | 2111 |
| 628  | morantel           | 11 µM  | PC3  | 0 | -0.062 | -0.187 | 1798 |
| 626  | estradiol          | 100 nM | MCF7 | 0 | -0.062 | -0.228 | 1633 |
| 707  | prasterone         | 12 µM  | MCF7 | 0 | -0.062 | -0.125 | 5019 |
| 659  | doxazosin          | 7 µM   | HL60 | 0 | -0.062 | -0.24  | 3024 |
| 619  | prednisolone       | 11 µM  | HL60 | 0 | -0.062 | -0.143 | 2393 |
| 753  | azacyclonol        | 15 µM  | PC3  | 0 | -0.062 | -0.167 | 6298 |
| 766  | hydroflumethiazide | 12 µM  | MCF7 | 0 | -0.062 | -0.182 | 7019 |
| 671  | zomepirac          | 13 µM  | MCF7 | 0 | -0.062 | -0.228 | 3454 |
| 641  | riboflavin         | 11 µM  | HL60 | 0 | -0.062 | -0.207 | 1767 |
| 649  | flunixin           | 8 µM   | HL60 | 0 | -0.062 | -0.243 | 2552 |
| 660  | (-)-atenolol       | 15 µM  | HL60 | 0 | -0.062 | -0.267 | 3067 |
| 24   | monastrol          | 100 µM | MCF7 | 0 | -0.062 | -0.108 | 311  |
| 61   | monorden           | 100 nM | PC3  | 0 | -0.062 | -0.087 | 449  |
| 616  | astemizole         | 9 µM   | PC3  | 0 | -0.062 | -0.212 | 2049 |
| 767  | LY-294002          | 100 nM | MCF7 | 0 | -0.062 | -0.17  | 6935 |
| 688  | fluvoxamine        | 9 µM   | PC3  | 0 | -0.062 | -0.243 | 3995 |
| 650  | sirolimus          | 100 nM | HL60 | 0 | -0.062 | -0.136 | 2667 |
| 622  | guanethidine       | 13 µM  | HL60 | 0 | -0.062 | -0.121 | 1554 |
| 692  | norcyclobenzaprine | 15 µM  | PC3  | 0 | -0.062 | -0.218 | 4190 |
| 1001 | valinomycin        | 100 nM | PC3  | 0 | -0.062 | -0.095 | 5911 |
| 648  | trioxysalen        | 18 µM  | HL60 | 0 | -0.062 | -0.206 | 2516 |
| 635  | salsolidin         | 16 µM  | HL60 | 0 | -0.062 | -0.217 | 2463 |
| 630  | suloctidil         | 12 µM  | HL60 | 0 | -0.063 | -0.136 | 1297 |
| 616  | chlorphenamine     | 10 µM  | PC3  | 0 | -0.063 | -0.202 | 2055 |
| 615  | ethosuximide       | 28 µM  | HL60 | 0 | -0.063 | -0.185 | 1433 |
| 710  | amoxapine          | 13 µM  | PC3  | 0 | -0.063 | -0.203 | 6650 |
| 1076 | fulvestrant        | 1 µM   | MCF7 | 0 | -0.063 | -0.226 | 7091 |
| 46   | clozapine          | 10 µM  | MCF7 | 0 | -0.063 | -0.123 | 416  |
| 677  | S-propranolol      | 14 µM  | MCF7 | 0 | -0.063 | -0.231 | 3523 |
| 660  | promethazine       | 12 µM  | HL60 | 0 | -0.063 | -0.225 | 3100 |
| 690  | fluvoxamine        | 9 µM   | MCF7 | 0 | -0.063 | -0.177 | 4114 |
| 689  | amylocaine         | 15 µM  | PC3  | 0 | -0.063 | -0.162 | 4089 |
| 712  | josamycin          | 5 µM   | PC3  | 0 | -0.063 | -0.11  | 4631 |

|      |                           |        |      |   |        |        |      |
|------|---------------------------|--------|------|---|--------|--------|------|
| 635  | R-atenolol                | 15 µM  | HL60 | 0 | -0.063 | -0.116 | 2496 |
| 700  | PNU-0230031               | 10 µM  | MCF7 | 0 | -0.063 | -0.194 | 4754 |
| 658  | beclometasone             | 8 µM   | HL60 | 0 | -0.063 | -0.249 | 3001 |
| 678  | sertaconazole             | 8 µM   | MCF7 | 0 | -0.063 | -0.193 | 3550 |
| 681  | fenbufen                  | 16 µM  | PC3  | 0 | -0.063 | -0.241 | 3721 |
| 660  | aminohippuric acid        | 21 µM  | HL60 | 0 | -0.063 | -0.251 | 3076 |
| 1036 | STOCK1N-35874             | 14 µM  | PC3  | 0 | -0.063 | -0.142 | 6561 |
| 727  | acetylsalicylic acid      | 100 µM | PC3  | 0 | -0.063 | -0.126 | 4428 |
| 631  | buflomedil                | 12 µM  | HL60 | 0 | -0.063 | -0.171 | 1338 |
| 680  | mephentermine             | 9 µM   | PC3  | 0 | -0.063 | -0.175 | 3685 |
| 762  | diphenhydramine           | 14 µM  | PC3  | 0 | -0.063 | -0.109 | 7318 |
| 655  | biotin                    | 16 µM  | MCF7 | 0 | -0.063 | -0.172 | 3289 |
| 752  | clobetasol                | 9 µM   | MCF7 | 0 | -0.063 | -0.182 | 6095 |
| 764  | dipivefrine               | 10 µM  | PC3  | 0 | -0.063 | -0.182 | 7124 |
| 699  | nitrofurantoin            | 17 µM  | MCF7 | 0 | -0.063 | -0.129 | 4697 |
| 506  | nordihydroguaiaretic acid | 1 µM   | MCF7 | 0 | -0.063 | -0.196 | 1003 |
| 611  | cotinine                  | 23 µM  | PC3  | 0 | -0.063 | -0.177 | 1929 |
| 618  | dantrolene                | 12 µM  | HL60 | 0 | -0.064 | -0.186 | 2369 |
| 613  | edrophonium chloride      | 20 µM  | HL60 | 0 | -0.064 | -0.19  | 2019 |
| 710  | bretylum tosilate         | 10 µM  | PC3  | 0 | -0.064 | -0.187 | 6674 |
| 748  | repaglinide               | 9 µM   | MCF7 | 0 | -0.064 | -0.205 | 7216 |
| 626  | acetylsalicylic acid      | 100 µM | MCF7 | 0 | -0.064 | -0.148 | 1629 |
| 695  | tolazoline                | 20 µM  | MCF7 | 0 | -0.064 | -0.119 | 4844 |
| 613  | oleandomycin              | 5 µM   | HL60 | 0 | -0.064 | -0.127 | 2018 |
| 642  | metaraminol               | 9 µM   | MCF7 | 0 | -0.064 | -0.209 | 2298 |
| 670  | ethoxyquin                | 18 µM  | MCF7 | 0 | -0.064 | -0.228 | 3421 |
| 753  | nimodipine                | 10 µM  | PC3  | 0 | -0.064 | -0.086 | 6320 |
| 622  | bambuterol                | 10 µM  | HL60 | 0 | -0.064 | -0.184 | 1582 |
| 664  | sanguinarine              | 12 µM  | HL60 | 0 | -0.064 | -0.239 | 2927 |
| 640  | ceftazidime               | 6 µM   | HL60 | 0 | -0.064 | -0.14  | 1721 |
| 627  | acetazolamide             | 18 µM  | MCF7 | 0 | -0.064 | -0.208 | 1686 |
| 715  | fluoxetine                | 12 µM  | PC3  | 0 | -0.064 | -0.176 | 6757 |
| 1006 | LY-294002                 | 10 µM  | MCF7 | 0 | -0.064 | -0.158 | 5937 |
| 630  | flupentixol               | 8 µM   | HL60 | 0 | -0.064 | -0.245 | 1288 |
| 737  | minocycline               | 8 µM   | MCF7 | 0 | -0.064 | -0.132 | 5496 |
| 772  | trazodone                 | 10 µM  | MCF7 | 0 | -0.064 | -0.245 | 7452 |
| 513  | sirolimus                 | 100 nM | MCF7 | 0 | -0.064 | -0.224 | 1045 |

|      |                    |        |      |   |        |        |      |
|------|--------------------|--------|------|---|--------|--------|------|
| 613  | azathioprine       | 14 µM  | HL60 | 0 | -0.064 | -0.166 | 2028 |
| 664  | meptazinol         | 15 µM  | HL60 | 0 | -0.064 | -0.245 | 2906 |
| 603  | tanespimycin       | 1 µM   | PC3  | 0 | -0.064 | -0.22  | 1226 |
| 645  | benfotiamine       | 9 µM   | HL60 | 0 | -0.065 | -0.193 | 2177 |
| 664  | cefalonium         | 9 µM   | HL60 | 0 | -0.065 | -0.257 | 2921 |
| 636  | isoniazid          | 29 µM  | MCF7 | 0 | -0.065 | -0.183 | 2246 |
| 726  | lorglumide         | 8 µM   | MCF7 | 0 | -0.065 | -0.162 | 5254 |
| 712  | metyrapone         | 18 µM  | PC3  | 0 | -0.065 | -0.207 | 4606 |
| 653  | pentoxyverine      | 8 µM   | MCF7 | 0 | -0.065 | -0.162 | 2623 |
| 614  | cefotaxime         | 8 µM   | HL60 | 0 | -0.065 | -0.149 | 1389 |
| 732  | demecarium bromide | 6 µM   | PC3  | 0 | -0.065 | -0.097 | 5795 |
| 699  | mephenesin         | 22 µM  | MCF7 | 0 | -0.065 | -0.121 | 4698 |
| 1080 | semustine          | 100 µM | MCF7 | 0 | -0.065 | -0.153 | 7487 |
| 743  | vinburnine         | 14 µM  | MCF7 | 0 | -0.065 | -0.175 | 6802 |
| 758  | amiodarone         | 6 µM   | MCF7 | 0 | -0.065 | -0.211 | 5618 |
| 616  | isoconazole        | 10 µM  | PC3  | 0 | -0.065 | -0.223 | 2056 |
| 506  | valproic acid      | 200 µM | MCF7 | 0 | -0.065 | -0.211 | 994  |
| 613  | perphenazine       | 10 µM  | HL60 | 0 | -0.065 | -0.127 | 2040 |
| 653  | chlorprothixene    | 11 µM  | MCF7 | 0 | -0.065 | -0.163 | 2627 |
| 738  | resveratrol        | 18 µM  | MCF7 | 0 | -0.065 | -0.203 | 5509 |
| 745  | ricinine           | 24 µM  | MCF7 | 0 | -0.065 | -0.176 | 6206 |
| 664  | fluticasone        | 8 µM   | HL60 | 0 | -0.065 | -0.264 | 2928 |
| 757  | estradiol          | 10 nM  | MCF7 | 0 | -0.065 | -0.14  | 5601 |
| 603  | estradiol          | 100 nM | PC3  | 0 | -0.065 | -0.184 | 1208 |
| 603  | clozapine          | 10 µM  | PC3  | 0 | -0.065 | -0.182 | 1229 |
| 502  | tretinoin          | 1 µM   | MCF7 | 0 | -0.065 | -0.241 | 966  |
| 719  | mometasone         | 8 µM   | PC3  | 0 | -0.065 | -0.17  | 5116 |
| 1083 | CP-944629          | 10 µM  | PC3  | 0 | -0.065 | -0.159 | 7502 |
| 748  | pridinol           | 10 µM  | MCF7 | 0 | -0.065 | -0.199 | 7214 |
| 750  | haloperidol        | 10 µM  | HL60 | 0 | -0.065 | -0.209 | 6163 |
| 682  | 0317956-0000       | 10 µM  | PC3  | 0 | -0.066 | -0.092 | 3774 |
| 765  | clozapine          | 10 µM  | MCF7 | 0 | -0.066 | -0.137 | 6988 |
| 641  | syrosingopine      | 6 µM   | HL60 | 0 | -0.066 | -0.213 | 1761 |
| 662  | racecadotril       | 10 µM  | MCF7 | 0 | -0.066 | -0.123 | 2774 |
| 730  | lynestrenol        | 14 µM  | MCF7 | 0 | -0.066 | -0.176 | 5355 |
| 631  | amantadine         | 10 µM  | HL60 | 0 | -0.066 | -0.16  | 1344 |
| 689  | betulinic acid     | 9 µM   | PC3  | 0 | -0.066 | -0.161 | 4101 |

|      |                    |        |      |   |        |        |      |
|------|--------------------|--------|------|---|--------|--------|------|
| 622  | cinnarizine        | 11 µM  | HL60 | 0 | -0.066 | -0.145 | 1558 |
| 651  | clidinium bromide  | 9 µM   | HL60 | 0 | -0.066 | -0.161 | 2734 |
| 651  | carbinoxamine      | 10 µM  | HL60 | 0 | -0.066 | -0.107 | 2725 |
| 744  | (-)-isoprenaline   | 16 µM  | MCF7 | 0 | -0.066 | -0.135 | 6833 |
| 1053 | AG-012559          | 10 µM  | MCF7 | 0 | -0.066 | -0.148 | 6889 |
| 727  | sirolimus          | 100 nM | PC3  | 0 | -0.066 | -0.127 | 4445 |
| 656  | probenecid         | 14 µM  | MCF7 | 0 | -0.066 | -0.124 | 2825 |
| 701  | fenbufen           | 16 µM  | PC3  | 0 | -0.066 | -0.193 | 4279 |
| 766  | tiratricol         | 6 µM   | MCF7 | 0 | -0.067 | -0.176 | 7011 |
| 699  | 0173570-0000       | 1 µM   | MCF7 | 0 | -0.067 | -0.199 | 4715 |
| 710  | (-)-MK-801         | 12 µM  | PC3  | 0 | -0.067 | -0.163 | 6657 |
| 731  | disulfiram         | 13 µM  | PC3  | 0 | -0.067 | -0.164 | 5729 |
| 502  | oxaprozin          | 300 µM | MCF7 | 0 | -0.067 | -0.157 | 971  |
| 627  | procaine           | 15 µM  | MCF7 | 0 | -0.067 | -0.224 | 1674 |
| 504  | monorden           | 100 nM | MCF7 | 0 | -0.067 | -0.229 | 836  |
| 726  | guanfacine         | 14 µM  | MCF7 | 0 | -0.067 | -0.195 | 5256 |
| 633  | oleandomycin       | 5 µM   | MCF7 | 0 | -0.067 | -0.155 | 1518 |
| 744  | atropine oxide     | 12 µM  | MCF7 | 0 | -0.067 | -0.115 | 6812 |
| 640  | laudanosine        | 11 µM  | HL60 | 0 | -0.067 | -0.221 | 1741 |
| 676  | meptazinol         | 15 µM  | MCF7 | 0 | -0.067 | -0.181 | 7326 |
| 736  | alfaxalone         | 12 µM  | MCF7 | 0 | -0.067 | -0.135 | 5451 |
| 748  | ivermectin         | 5 µM   | MCF7 | 0 | -0.067 | -0.143 | 7206 |
| 640  | cyclizine          | 13 µM  | HL60 | 0 | -0.067 | -0.153 | 1731 |
| 615  | tranlycypromine    | 24 µM  | HL60 | 0 | -0.067 | -0.146 | 1417 |
| 767  | sirolimus          | 100 nM | MCF7 | 0 | -0.067 | -0.212 | 6927 |
| 617  | tolfenamic acid    | 15 µM  | PC3  | 0 | -0.067 | -0.233 | 2120 |
| 771  | lincomycin         | 9 µM   | MCF7 | 0 | -0.067 | -0.161 | 7411 |
| 646  | amodiaquine        | 9 µM   | MCF7 | 0 | -0.067 | -0.154 | 3186 |
| 765  | valproic acid      | 200 µM | MCF7 | 0 | -0.067 | -0.206 | 6974 |
| 630  | chlorprothixene    | 11 µM  | HL60 | 0 | -0.067 | -0.169 | 1272 |
| 642  | kawain             | 17 µM  | MCF7 | 0 | -0.067 | -0.242 | 2299 |
| 1057 | 0297417-0002B      | 10 µM  | MCF7 | 0 | -0.067 | -0.223 | 6902 |
| 707  | prochlorperazine   | 7 µM   | MCF7 | 0 | -0.067 | -0.139 | 5010 |
| 729  | diltiazem          | 9 µM   | MCF7 | 0 | -0.067 | -0.216 | 5309 |
| 772  | risperidone        | 10 µM  | MCF7 | 0 | -0.067 | -0.258 | 7449 |
| 610  | naphazoline        | 16 µM  | PC3  | 0 | -0.067 | -0.119 | 1886 |
| 627  | hydroflumethiazide | 12 µM  | MCF7 | 0 | -0.067 | -0.164 | 1687 |



|      |                                   |        |        |   |        |        |      |
|------|-----------------------------------|--------|--------|---|--------|--------|------|
| 732  | lidoflazine                       | 8 µM   | PC3    | 0 | -0.067 | -0.171 | 5804 |
| 665  | pyrvinium                         | 3 µM   | HL60   | 0 | -0.067 | -0.186 | 2957 |
| 735  | amoxicillin                       | 11 µM  | MCF7   | 0 | -0.067 | -0.117 | 5385 |
| 642  | phenformin                        | 17 µM  | MCF7   | 0 | -0.067 | -0.183 | 2312 |
| 719  | bufexamac                         | 18 µM  | PC3    | 0 | -0.067 | -0.23  | 5090 |
| 698  | cefazolin                         | 8 µM   | PC3    | 0 | -0.067 | -0.157 | 7385 |
| 631  | cefotetan                         | 7 µM   | HL60   | 0 | -0.067 | -0.141 | 1319 |
| 730  | ioversol                          | 5 µM   | MCF7   | 0 | -0.068 | -0.25  | 5326 |
| 714  | monobenzone                       | 20 µM  | PC3    | 0 | -0.068 | -0.164 | 6713 |
| 732  | ebselen                           | 15 µM  | PC3    | 0 | -0.068 | -0.212 | 5778 |
| 614  | dizocilpine                       | 12 µM  | HL60   | 0 | -0.068 | -0.172 | 1386 |
| 672  | trichostatin A                    | 100 nM | MCF7   | 0 | -0.068 | -0.259 | 3332 |
| 1092 | CP-944629                         | 10 µM  | MCF7   | 0 | -0.068 | -0.201 | 7544 |
| 1085 | 16-phenyltetranorprostaglandin E2 | 10 µM  | PC3    | 0 | -0.068 | -0.268 | 7509 |
| 653  | ritodrine                         | 12 µM  | MCF7   | 0 | -0.068 | -0.231 | 2635 |
| 642  | tropicamide                       | 14 µM  | MCF7   | 0 | -0.068 | -0.21  | 2309 |
| 505  | 5114445                           | 10 µM  | MCF7   | 0 | -0.068 | -0.197 | 901  |
| 636  | atropine oxide                    | 12 µM  | MCF7   | 0 | -0.068 | -0.115 | 2216 |
| 750  | genistein                         | 10 µM  | HL60   | 0 | -0.068 | -0.186 | 6194 |
| 632  | miconazole                        | 10 µM  | MCF7   | 0 | -0.068 | -0.113 | 1477 |
| 506  | clozapine                         | 10 µM  | MCF7   | 0 | -0.068 | -0.159 | 1009 |
| 672  | (+/-)-catechin                    | 14 µM  | MCF7   | 0 | -0.068 | -0.145 | 3351 |
| 660  | fluspirilene                      | 8 µM   | HL60   | 0 | -0.068 | -0.246 | 3086 |
| 714  | moroxydine                        | 19 µM  | PC3    | 0 | -0.068 | -0.174 | 6705 |
| 713  | 3-acetyloumarin                   | 21 µM  | PC3    | 0 | -0.068 | -0.105 | 4664 |
| 613  | loxapine                          | 9 µM   | HL60   | 0 | -0.068 | -0.115 | 2016 |
| 670  | flumetasone                       | 10 µM  | MCF7   | 0 | -0.068 | -0.184 | 3410 |
| 746  | tremorine                         | 15 µM  | MCF7   | 0 | -0.068 | -0.208 | 6273 |
| 670  | furaltadone                       | 11 µM  | MCF7   | 0 | -0.068 | -0.184 | 3413 |
| 732  | thiopropazine                     | 6 µM   | PC3    | 0 | -0.068 | -0.165 | 5791 |
| 748  | abamectin                         | 5 µM   | MCF7   | 0 | -0.068 | -0.212 | 7218 |
| 1017 | PF-01378883-00                    | 10 µM  | PC3    | 0 | -0.068 | -0.169 | 6368 |
| 615  | hyoscyamine                       | 14 µM  | HL60   | 0 | -0.068 | -0.137 | 1424 |
| 727  | LY-294002                         | 10 µM  | PC3    | 0 | -0.068 | -0.154 | 4451 |
| 720  | levcycloserine                    | 39 µM  | MCF7   | 0 | -0.068 | -0.153 | 4346 |
| 109  | valproic acid                     | 1 mM   | SKMEL5 | 0 | -0.068 | -0.189 | 629  |
| 618  | fenbendazole                      | 13 µM  | HL60   | 0 | -0.068 | -0.12  | 2360 |

|      |                             |        |      |   |        |        |      |
|------|-----------------------------|--------|------|---|--------|--------|------|
| 734  | nomifensine                 | 11 µM  | PC3  | 0 | -0.068 | -0.129 | 5863 |
| 712  | droperidol                  | 11 µM  | PC3  | 0 | -0.068 | -0.174 | 4629 |
| 705  | sparteine                   | 17 µM  | MCF7 | 0 | -0.068 | -0.242 | 4391 |
| 648  | metoprolol                  | 6 µM   | HL60 | 0 | -0.068 | -0.252 | 2543 |
| 772  | clemastine                  | 9 µM   | MCF7 | 0 | -0.068 | -0.157 | 7485 |
| 627  | epirizole                   | 17 µM  | MCF7 | 0 | -0.068 | -0.204 | 1681 |
| 701  | foliosidine                 | 13 µM  | PC3  | 0 | -0.069 | -0.17  | 4295 |
| 110b | genistein                   | 10 µM  | PC3  | 0 | -0.069 | -0.095 | 703  |
| 762  | isotretinoin                | 13 µM  | PC3  | 0 | -0.069 | -0.109 | 7315 |
| 649  | cloperastine                | 11 µM  | HL60 | 0 | -0.069 | -0.224 | 2549 |
| 632  | naphazoline                 | 16 µM  | MCF7 | 0 | -0.069 | -0.202 | 1466 |
| 506  | sirolimus                   | 100 nM | MCF7 | 0 | -0.069 | -0.237 | 987  |
| 694  | canavanine                  | 14 µM  | MCF7 | 0 | -0.069 | -0.251 | 4782 |
| 730  | desoxycortone               | 12 µM  | MCF7 | 0 | -0.069 | -0.251 | 5357 |
| 90   | U0125                       | 1 µM   | PC3  | 0 | -0.069 | -0.131 | 663  |
| 738  | telenzepine                 | 9 µM   | MCF7 | 0 | -0.069 | -0.187 | 5521 |
| 712  | oleandomycin                | 5 µM   | PC3  | 0 | -0.069 | -0.151 | 4615 |
| 771  | lisinopril                  | 9 µM   | MCF7 | 0 | -0.069 | -0.168 | 7403 |
| 720  | guaifenesin                 | 20 µM  | MCF7 | 0 | -0.069 | -0.132 | 4371 |
| 761  | artemisinin                 | 14 µM  | PC3  | 0 | -0.069 | -0.207 | 7247 |
| 672  | Prestwick-857               | 12 µM  | MCF7 | 0 | -0.069 | -0.117 | 3355 |
| 746  | Prestwick-1085              | 15 µM  | MCF7 | 0 | -0.069 | -0.232 | 6250 |
| 726  | bephenium hydroxynaphthoate | 9 µM   | MCF7 | 0 | -0.069 | -0.217 | 5263 |
| 662  | berberine                   | 11 µM  | MCF7 | 0 | -0.069 | -0.15  | 2770 |
| 693  | cyclopenthiiazide           | 11 µM  | PC3  | 0 | -0.069 | -0.174 | 4229 |
| 654  | corticosterone              | 12 µM  | MCF7 | 0 | -0.069 | -0.193 | 3244 |
| 1052 | carmustine                  | 100 µM | PC3  | 0 | -0.069 | -0.163 | 6883 |
| 659  | latamoxef                   | 7 µM   | HL60 | 0 | -0.069 | -0.233 | 3028 |
| 687  | CP-690334-01                | 10 µM  | MCF7 | 0 | -0.069 | -0.213 | 3906 |
| 1055 | 0297417-0002B               | 10 µM  | MCF7 | 0 | -0.069 | -0.181 | 6900 |
| 622  | albendazole                 | 15 µM  | HL60 | 0 | -0.069 | -0.162 | 1547 |
| 636  | pirenzepine                 | 9 µM   | MCF7 | 0 | -0.069 | -0.128 | 2234 |
| 617  | hydrastinine                | 16 µM  | PC3  | 0 | -0.069 | -0.214 | 2119 |
| 762  | dosulepin                   | 12 µM  | PC3  | 0 | -0.069 | -0.138 | 7284 |
| 771  | flavoxate                   | 9 µM   | MCF7 | 0 | -0.069 | -0.224 | 7405 |
| 659  | diclofenamide               | 13 µM  | HL60 | 0 | -0.069 | -0.101 | 3027 |
| 513  | sirolimus                   | 100 nM | MCF7 | 0 | -0.069 | -0.214 | 1080 |

|      |                           |        |      |   |        |        |      |
|------|---------------------------|--------|------|---|--------|--------|------|
| 629  | hydroflumethiazide        | 12 µM  | HL60 | 0 | -0.069 | -0.253 | 1851 |
| 646  | oxybutynin                | 10 µM  | MCF7 | 0 | -0.069 | -0.135 | 3168 |
| 767  | chlorpromazine            | 1 µM   | MCF7 | 0 | -0.069 | -0.126 | 6936 |
| 757  | 15-delta prostaglandin J2 | 10 µM  | MCF7 | 0 | -0.069 | -0.229 | 5591 |
| 754  | tubocurarine chloride     | 5 µM   | PC3  | 0 | -0.069 | -0.173 | 6351 |
| 617  | flufenamic acid           | 14 µM  | PC3  | 0 | -0.069 | -0.215 | 2104 |
| 756  | pizotifen                 | 9 µM   | MCF7 | 0 | -0.07  | -0.155 | 6513 |
| 513  | haloperidol               | 10 µM  | MCF7 | 0 | -0.07  | -0.223 | 1041 |
| 25   | LY-294002                 | 10 µM  | MCF7 | 0 | -0.07  | -0.134 | 318  |
| 612  | miconazole                | 10 µM  | HL60 | 0 | -0.07  | -0.124 | 1977 |
| 752  | ricinine                  | 24 µM  | MCF7 | 0 | -0.07  | -0.157 | 6067 |
| 612  | lidocaine                 | 15 µM  | HL60 | 0 | -0.07  | -0.132 | 1999 |
| 728  | trichostatin A            | 100 nM | PC3  | 0 | -0.07  | -0.226 | 4483 |
| 765  | sirolimus                 | 100 nM | MCF7 | 0 | -0.07  | -0.23  | 6981 |
| 68   | monorden                  | 100 nM | MCF7 | 0 | -0.07  | -0.16  | 489  |
| 664  | pronetalol                | 15 µM  | HL60 | 0 | -0.07  | -0.272 | 2902 |
| 749  | oxyphenbutazone           | 12 µM  | HL60 | 0 | -0.07  | -0.172 | 6160 |
| 683  | tinidazole                | 16 µM  | PC3  | 0 | -0.07  | -0.149 | 3813 |
| 767  | valproic acid             | 200 µM | MCF7 | 0 | -0.07  | -0.122 | 6934 |
| 766  | pargyline                 | 20 µM  | MCF7 | 0 | -0.07  | -0.171 | 7016 |
| 711  | solasodine                | 10 µM  | MCF7 | 0 | -0.07  | -0.182 | 3924 |
| 728  | pindolol                  | 16 µM  | PC3  | 0 | -0.07  | -0.126 | 4496 |
| 1003 | rotenone                  | 1 µM   | PC3  | 0 | -0.07  | -0.095 | 5920 |
| 610  | diflunisal                | 16 µM  | PC3  | 0 | -0.07  | -0.139 | 1908 |
| 1078 | 0198306-0000              | 10 µM  | MCF7 | 0 | -0.07  | -0.132 | 7099 |
| 635  | tolazamide                | 13 µM  | HL60 | 0 | -0.07  | -0.245 | 2482 |
| 690  | oxamniquine               | 14 µM  | MCF7 | 0 | -0.07  | -0.124 | 4124 |
| 753  | butoconazole              | 8 µM   | PC3  | 0 | -0.07  | -0.166 | 6288 |
| 634  | felodipine                | 10 µM  | HL60 | 0 | -0.07  | -0.23  | 2433 |
| 665  | S-propranolol             | 14 µM  | HL60 | 0 | -0.07  | -0.159 | 2961 |
| 646  | tretinoin                 | 13 µM  | MCF7 | 0 | -0.07  | -0.154 | 3165 |
| 635  | orciprenaline             | 8 µM   | HL60 | 0 | -0.071 | -0.109 | 2485 |
| 636  | gallamine triethiodide    | 4 µM   | MCF7 | 0 | -0.071 | -0.177 | 2221 |
| 647  | betaxolol                 | 12 µM  | MCF7 | 0 | -0.071 | -0.21  | 3208 |
| 642  | ketoprofen                | 16 µM  | MCF7 | 0 | -0.071 | -0.163 | 2316 |
| 757  | tanespimycin              | 1 µM   | MCF7 | 0 | -0.071 | -0.227 | 5586 |
| 659  | luteolin                  | 14 µM  | HL60 | 0 | -0.071 | -0.223 | 3041 |

|      |                       |        |      |   |        |        |      |
|------|-----------------------|--------|------|---|--------|--------|------|
| 614  | dexamethasone         | 9 µM   | HL60 | 0 | -0.071 | -0.144 | 1396 |
| 631  | cyanocobalamin        | 3 µM   | HL60 | 0 | -0.071 | -0.253 | 1315 |
| 729  | cisapride             | 9 µM   | MCF7 | 0 | -0.071 | -0.231 | 5305 |
| 641  | acepromazine          | 9 µM   | HL60 | 0 | -0.071 | -0.162 | 1777 |
| 644  | palmatine             | 10 µM  | HL60 | 0 | -0.071 | -0.205 | 2138 |
| 653  | coralyne              | 10 µM  | MCF7 | 0 | -0.071 | -0.116 | 2652 |
| 676  | etamsylate            | 15 µM  | MCF7 | 0 | -0.071 | -0.177 | 7335 |
| 706  | sulfabenzamide        | 14 µM  | MCF7 | 0 | -0.071 | -0.186 | 4979 |
| 730  | fusidic acid          | 7 µM   | MCF7 | 0 | -0.071 | -0.181 | 5353 |
| 629  | carbamazepine         | 17 µM  | HL60 | 0 | -0.071 | -0.199 | 1847 |
| 623  | methyldopa            | 19 µM  | HL60 | 0 | -0.071 | -0.181 | 1619 |
| 670  | demeclocycline        | 8 µM   | MCF7 | 0 | -0.071 | -0.16  | 3404 |
| 712  | tyloxapol             | 4 µM   | PC3  | 0 | -0.071 | -0.211 | 4611 |
| 659  | phthalylsulfathiazole | 10 µM  | HL60 | 0 | -0.071 | -0.273 | 3033 |
| 710  | trichostatin A        | 100 nM | PC3  | 0 | -0.071 | -0.212 | 6671 |
| 29   | azathioprine          | 100 µM | MCF7 | 0 | -0.071 | -0.11  | 338  |
| 683  | spiradoline           | 1 µM   | PC3  | 0 | -0.071 | -0.111 | 3818 |
| 738  | enilconazole          | 13 µM  | MCF7 | 0 | -0.071 | -0.133 | 5538 |
| 1086 | BCB000038             | 10 µM  | MCF7 | 0 | -0.071 | -0.17  | 7516 |
| 648  | butirosin             | 5 µM   | HL60 | 0 | -0.071 | -0.201 | 2518 |
| 671  | cinoxacin             | 15 µM  | MCF7 | 0 | -0.071 | -0.238 | 3463 |
| 758  | phenoxybenzamine      | 12 µM  | MCF7 | 0 | -0.071 | -0.255 | 5613 |
| 729  | promethazine          | 12 µM  | MCF7 | 0 | -0.071 | -0.237 | 5317 |
| 653  | domperidone           | 7 µM   | MCF7 | 0 | -0.072 | -0.204 | 2655 |
| 744  | riboflavin            | 11 µM  | MCF7 | 0 | -0.072 | -0.199 | 6822 |
| 651  | ribostamycin          | 7 µM   | HL60 | 0 | -0.072 | -0.197 | 2705 |
| 647  | chlorpropamide        | 14 µM  | MCF7 | 0 | -0.072 | -0.211 | 3210 |
| 7a   | verapamil             | 10 µM  | MCF7 | 0 | -0.072 | -0.184 | 161  |
| 502  | quinostatin           | 10 µM  | MCF7 | 0 | -0.072 | -0.236 | 973  |
| 754  | oxymetazoline         | 13 µM  | PC3  | 0 | -0.072 | -0.149 | 6350 |
| 730  | metergoline           | 10 µM  | MCF7 | 0 | -0.072 | -0.223 | 5344 |
| 745  | terbutaline           | 7 µM   | MCF7 | 0 | -0.072 | -0.246 | 6240 |
| 689  | tiaprofenic acid      | 15 µM  | PC3  | 0 | -0.072 | -0.201 | 4091 |
| 756  | rilmnidine            | 8 µM   | MCF7 | 0 | -0.072 | -0.169 | 6512 |
| 681  | levonorgestrel        | 13 µM  | PC3  | 0 | -0.072 | -0.19  | 3708 |
| 726  | cefalexin             | 11 µM  | MCF7 | 0 | -0.072 | -0.193 | 5250 |
| 678  | (-)-isoprenaline      | 16 µM  | MCF7 | 0 | -0.072 | -0.148 | 3571 |

|      |                        |        |      |   |        |        |      |
|------|------------------------|--------|------|---|--------|--------|------|
| 661  | nisoxetine             | 13 µM  | HL60 | 0 | -0.072 | -0.174 | 3117 |
| 692  | nystatin               | 4 µM   | PC3  | 0 | -0.072 | -0.084 | 4223 |
| 502  | Y-27632                | 3 µM   | MCF7 | 0 | -0.072 | -0.171 | 948  |
| 701  | diphenylpyraline       | 13 µM  | PC3  | 0 | -0.072 | -0.117 | 4299 |
| 725  | genistein              | 10 µM  | MCF7 | 0 | -0.072 | -0.161 | 5232 |
| 649  | medrysone              | 12 µM  | HL60 | 0 | -0.072 | -0.251 | 2544 |
| 610  | miconazole             | 10 µM  | PC3  | 0 | -0.072 | -0.157 | 1896 |
| 731  | dihydrostreptomycin    | 3 µM   | PC3  | 0 | -0.072 | -0.132 | 5751 |
| 726  | phthalylsulfathiazole  | 10 µM  | MCF7 | 0 | -0.072 | -0.241 | 5249 |
| 630  | bepidil                | 10 µM  | HL60 | 0 | -0.072 | -0.183 | 1274 |
| 754  | doxepin                | 13 µM  | PC3  | 0 | -0.072 | -0.178 | 6337 |
| 1043 | PHA-00665752           | 10 µM  | MCF7 | 0 | -0.073 | -0.22  | 6578 |
| 504  | 5252917                | 14 µM  | MCF7 | 0 | -0.073 | -0.128 | 828  |
| 90   | resveratrol            | 50 µM  | PC3  | 0 | -0.073 | -0.187 | 662  |
| 1062 | scriptaid              | 10 µM  | PC3  | 0 | -0.073 | -0.142 | 6919 |
| 18   | rofecoxib              | 10 µM  | MCF7 | 0 | -0.073 | -0.126 | 251  |
| 671  | sulfanilamide          | 23 µM  | MCF7 | 0 | -0.073 | -0.229 | 3449 |
| 762  | thalidomide            | 15 µM  | PC3  | 0 | -0.073 | -0.22  | 7288 |
| 602  | valproic acid          | 50 µM  | HL60 | 0 | -0.073 | -0.174 | 1163 |
| 765  | LY-294002              | 10 µM  | MCF7 | 0 | -0.073 | -0.193 | 6987 |
| 513  | sirolimus              | 100 nM | MCF7 | 0 | -0.073 | -0.215 | 1059 |
| 82   | tetraethylenepentamine | 100 µM | MCF7 | 0 | -0.073 | -0.202 | 574  |
| 656  | salsolidin             | 16 µM  | MCF7 | 0 | -0.073 | -0.179 | 2824 |
| 635  | methoxamine            | 16 µM  | HL60 | 0 | -0.073 | -0.227 | 2488 |
| 710  | (+)-isoprenaline       | 11 µM  | PC3  | 0 | -0.073 | -0.154 | 6663 |
| 502  | wortmannin             | 1 µM   | MCF7 | 0 | -0.073 | -0.183 | 977  |
| 603  | prochlorperazine       | 10 µM  | PC3  | 0 | -0.073 | -0.203 | 1215 |
| 1052 | AH-23848               | 1 µM   | PC3  | 0 | -0.073 | -0.099 | 6885 |
| 695  | cetirizine             | 9 µM   | MCF7 | 0 | -0.073 | -0.238 | 4815 |
| 711  | phentolamine           | 13 µM  | MCF7 | 0 | -0.073 | -0.225 | 3971 |
| 513  | fulvestrant            | 1 µM   | MCF7 | 0 | -0.073 | -0.23  | 1043 |
| 614  | nicergoline            | 8 µM   | HL60 | 0 | -0.073 | -0.141 | 1374 |
| 687  | citalopram             | 1 µM   | MCF7 | 0 | -0.073 | -0.217 | 3903 |
| 702  | fluocinonide           | 8 µM   | PC3  | 0 | -0.073 | -0.13  | 4314 |
| 613  | glipizide              | 9 µM   | HL60 | 0 | -0.073 | -0.113 | 2008 |
| 603  | valproic acid          | 200 µM | PC3  | 0 | -0.073 | -0.225 | 1214 |
| 737  | piracetam              | 28 µM  | MCF7 | 0 | -0.073 | -0.117 | 5462 |

|      |                             |       |      |   |        |        |      |
|------|-----------------------------|-------|------|---|--------|--------|------|
| 642  | salbutamol                  | 17 µM | MCF7 | 0 | -0.073 | -0.215 | 2306 |
| 678  | oxprenolol                  | 13 µM | MCF7 | 0 | -0.073 | -0.15  | 3568 |
| 640  | etamivan                    | 18 µM | HL60 | 0 | -0.073 | -0.169 | 1730 |
| 651  | isoetarine                  | 12 µM | HL60 | 0 | -0.073 | -0.098 | 2711 |
| 771  | trazodone                   | 10 µM | MCF7 | 0 | -0.073 | -0.221 | 7410 |
| 772  | chlorzoxazone               | 24 µM | MCF7 | 0 | -0.073 | -0.228 | 7456 |
| 627  | chlorpromazine              | 11 µM | MCF7 | 0 | -0.073 | -0.13  | 1700 |
| 747  | triamcinolone               | 10 µM | MCF7 | 0 | -0.073 | -0.133 | 7192 |
| 758  | bephenium hydroxynaphthoate | 9 µM  | MCF7 | 0 | -0.073 | -0.181 | 5628 |
| 610  | minaprine                   | 11 µM | PC3  | 0 | -0.073 | -0.137 | 1888 |
| 619  | enalapril                   | 8 µM  | HL60 | 0 | -0.073 | -0.14  | 2397 |
| 610  | thioridazine                | 10 µM | PC3  | 0 | -0.073 | -0.128 | 1905 |
| 636  | nomifensine                 | 11 µM | MCF7 | 0 | -0.073 | -0.18  | 2224 |
| 632  | doxylamine                  | 10 µM | MCF7 | 0 | -0.074 | -0.143 | 1473 |
| 703  | quinethazone                | 14 µM | PC3  | 0 | -0.074 | -0.091 | 4529 |
| 615  | oxolinic acid               | 15 µM | HL60 | 0 | -0.074 | -0.117 | 1419 |
| 641  | yohimbine                   | 10 µM | HL60 | 0 | -0.074 | -0.187 | 1763 |
| 640  | prenylamine                 | 10 µM | HL60 | 0 | -0.074 | -0.117 | 1737 |
| 754  | fenoterol                   | 10 µM | PC3  | 0 | -0.074 | -0.171 | 6331 |
| 750  | prochlorperazine            | 10 µM | HL60 | 0 | -0.074 | -0.226 | 6174 |
| 1073 | AH-6809                     | 1 µM  | PC3  | 0 | -0.074 | -0.126 | 7075 |
| 655  | ergocalciferol              | 10 µM | MCF7 | 0 | -0.074 | -0.138 | 3304 |
| 612  | idoxuridine                 | 11 µM | HL60 | 0 | -0.074 | -0.181 | 1980 |
| 683  | ethotoin                    | 20 µM | PC3  | 0 | -0.074 | -0.156 | 3809 |
| 695  | piperine                    | 14 µM | MCF7 | 0 | -0.074 | -0.252 | 4830 |
| 700  | flumetasone                 | 10 µM | MCF7 | 0 | -0.074 | -0.127 | 4734 |
| 745  | sulfinpyrazone              | 10 µM | MCF7 | 0 | -0.074 | -0.135 | 6230 |
| 660  | metyrapone                  | 18 µM | HL60 | 0 | -0.074 | -0.24  | 3070 |
| 756  | proxymetacaine              | 12 µM | MCF7 | 0 | -0.074 | -0.225 | 6492 |
| 726  | dipyridamole                | 8 µM  | MCF7 | 0 | -0.074 | -0.216 | 5252 |
| 704  | thiostrepton                | 2 µM  | PC3  | 0 | -0.074 | -0.192 | 4563 |
| 709  | nifurtimox                  | 14 µM | PC3  | 0 | -0.074 | -0.107 | 6608 |
| 626  | tretinoin                   | 1 µM  | MCF7 | 0 | -0.074 | -0.205 | 1636 |
| 671  | hexylcaine                  | 13 µM | MCF7 | 0 | -0.074 | -0.253 | 3447 |
| 677  | tribenoside                 | 8 µM  | MCF7 | 0 | -0.074 | -0.108 | 3507 |
| 707  | methotrexate                | 9 µM  | MCF7 | 0 | -0.074 | -0.257 | 5000 |
| 710  | ciclopirox                  | 15 µM | PC3  | 0 | -0.074 | -0.19  | 6677 |

|      |                           |        |        |   |        |        |      |
|------|---------------------------|--------|--------|---|--------|--------|------|
| 761  | atropine methonitrate     | 11 µM  | PC3    | 0 | -0.074 | -0.143 | 7253 |
| 653  | androsterone              | 14 µM  | MCF7   | 0 | -0.074 | -0.161 | 2650 |
| 677  | levocabastine             | 9 µM   | MCF7   | 0 | -0.074 | -0.15  | 3509 |
| 636  | chlorphenamine            | 10 µM  | MCF7   | 0 | -0.074 | -0.129 | 2217 |
| 741  | proxyphylline             | 17 µM  | MCF7   | 0 | -0.074 | -0.162 | 5993 |
| 647  | practolol                 | 15 µM  | MCF7   | 0 | -0.074 | -0.163 | 3204 |
| 71   | indometacin               | 100 µM | SKMEL5 | 0 | -0.074 | -0.063 | 503  |
| 705  | pentamidine               | 7 µM   | MCF7   | 0 | -0.074 | -0.226 | 4396 |
| 622  | fendiline                 | 11 µM  | HL60   | 0 | -0.075 | -0.182 | 1573 |
| 743  | methylprednisolone        | 11 µM  | MCF7   | 0 | -0.075 | -0.138 | 6785 |
| 641  | physostigmine             | 6 µM   | HL60   | 0 | -0.075 | -0.146 | 1776 |
| 649  | demeclocycline            | 8 µM   | HL60   | 0 | -0.075 | -0.21  | 2545 |
| 745  | dihydrostreptomycin       | 3 µM   | MCF7   | 0 | -0.075 | -0.227 | 6228 |
| 765  | nordihydroguaiaretic acid | 1 µM   | MCF7   | 0 | -0.075 | -0.168 | 6983 |
| 650  | alpha-estradiol           | 10 nM  | HL60   | 0 | -0.075 | -0.165 | 2670 |
| 635  | cetirizine                | 9 µM   | HL60   | 0 | -0.075 | -0.264 | 2468 |
| 678  | sulfadoxine               | 13 µM  | MCF7   | 0 | -0.075 | -0.141 | 3547 |
| 651  | zomepirac                 | 13 µM  | HL60   | 0 | -0.075 | -0.205 | 2713 |
| 673  | monobenzone               | 20 µM  | MCF7   | 0 | -0.075 | -0.181 | 3391 |
| 671  | carbinoxamine             | 10 µM  | MCF7   | 0 | -0.075 | -0.211 | 3466 |
| 702  | proglumide                | 12 µM  | PC3    | 0 | -0.075 | -0.141 | 4337 |
| 615  | pargyline                 | 20 µM  | HL60   | 0 | -0.075 | -0.185 | 1418 |
| 691  | cimetidine                | 16 µM  | MCF7   | 0 | -0.075 | -0.108 | 4144 |
| 745  | gallamine triethiodide    | 4 µM   | MCF7   | 0 | -0.075 | -0.2   | 6215 |
| 74   | tanespimycin              | 1 µM   | ssMCF7 | 0 | -0.075 | -0.172 | 521  |
| 616  | mefloquine                | 10 µM  | PC3    | 0 | -0.075 | -0.21  | 2048 |
| 506  | alvespimycin              | 100 nM | MCF7   | 0 | -0.075 | -0.22  | 993  |
| 728  | clomipramine              | 11 µM  | PC3    | 0 | -0.075 | -0.164 | 4487 |
| 1093 | BCB000038                 | 10 µM  | PC3    | 0 | -0.075 | -0.109 | 7547 |
| 619  | glafenine                 | 10 µM  | HL60   | 0 | -0.075 | -0.158 | 2387 |
| 752  | tetrandrine               | 6 µM   | MCF7   | 0 | -0.075 | -0.196 | 6082 |
| 750  | tanespimycin              | 1 µM   | HL60   | 0 | -0.075 | -0.15  | 6166 |
| 646  | pimozide                  | 9 µM   | MCF7   | 0 | -0.075 | -0.162 | 3178 |
| 670  | fluocinonide              | 8 µM   | MCF7   | 0 | -0.075 | -0.203 | 3414 |
| 715  | metanephrine              | 17 µM  | PC3    | 0 | -0.075 | -0.126 | 6734 |
| 1    | metformin                 | 10 µM  | MCF7   | 0 | -0.075 | -0.096 | 1    |
| 642  | mebendazole               | 14 µM  | MCF7   | 0 | -0.075 | -0.156 | 2300 |

|      |                             |        |      |   |        |        |      |
|------|-----------------------------|--------|------|---|--------|--------|------|
| 698  | mebendazole                 | 14 µM  | PC3  | 0 | -0.075 | -0.146 | 7370 |
| 631  | ginkgolide A                | 10 µM  | HL60 | 0 | -0.075 | -0.265 | 1324 |
| 714  | benserazide                 | 14 µM  | PC3  | 0 | -0.075 | -0.11  | 6722 |
| 703  | nialamide                   | 13 µM  | PC3  | 0 | -0.075 | -0.134 | 4525 |
| 661  | nabumetone                  | 18 µM  | HL60 | 0 | -0.076 | -0.196 | 3108 |
| 708  | metyrapone                  | 18 µM  | MCF7 | 0 | -0.076 | -0.237 | 5667 |
| 635  | trimethadione               | 28 µM  | HL60 | 0 | -0.076 | -0.15  | 2486 |
| 603  | rosiglitazone               | 10 µM  | PC3  | 0 | -0.076 | -0.119 | 1233 |
| 602  | tanespimycin                | 1 µM   | HL60 | 0 | -0.076 | -0.239 | 1147 |
| 635  | benperidol                  | 10 µM  | HL60 | 0 | -0.076 | -0.115 | 2475 |
| 727  | rosiglitazone               | 10 µM  | PC3  | 0 | -0.076 | -0.144 | 4457 |
| 752  | fluorouracine               | 12 µM  | MCF7 | 0 | -0.076 | -0.136 | 6083 |
| 648  | trichostatin A              | 100 nM | HL60 | 0 | -0.076 | -0.214 | 2523 |
| 735  | dobutamine                  | 12 µM  | MCF7 | 0 | -0.076 | -0.13  | 5386 |
| 644  | dydrogesterone              | 13 µM  | HL60 | 0 | -0.076 | -0.129 | 2156 |
| 756  | adipiodone                  | 4 µM   | MCF7 | 0 | -0.076 | -0.251 | 6490 |
| 734  | estriol                     | 14 µM  | PC3  | 0 | -0.076 | -0.148 | 5866 |
| 1036 | 6-bromoindirubin-3'-oxime   | 500 nM | PC3  | 0 | -0.076 | -0.181 | 6559 |
| 636  | spironolactone              | 10 µM  | MCF7 | 0 | -0.076 | -0.15  | 2226 |
| 748  | benzethonium chloride       | 9 µM   | MCF7 | 0 | -0.076 | -0.161 | 7207 |
| 53   | staurosporine               | 100 nM | MCF7 | 0 | -0.076 | -0.166 | 423  |
| 751  | methylbenzethonium chloride | 9 µM   | MCF7 | 0 | -0.076 | -0.169 | 6045 |
| 751  | 2,6-dimethylpiperidine      | 27 µM  | MCF7 | 0 | -0.076 | -0.109 | 6049 |
| 617  | levamisole                  | 17 µM  | PC3  | 0 | -0.076 | -0.224 | 2094 |
| 772  | noretynodrel                | 13 µM  | MCF7 | 0 | -0.076 | -0.162 | 7471 |
| 710  | diloxanide                  | 12 µM  | PC3  | 0 | -0.076 | -0.135 | 6679 |
| 5    | mesalazine                  | 100 µM | MCF7 | 0 | -0.076 | -0.217 | 124  |
| 753  | zoxazolamine                | 24 µM  | PC3  | 0 | -0.076 | -0.215 | 6290 |
| 714  | chlorprothixene             | 11 µM  | PC3  | 0 | -0.076 | -0.207 | 6692 |
| 650  | prochlorperazine            | 10 µM  | HL60 | 0 | -0.076 | -0.166 | 2675 |
| 767  | fulvestrant                 | 1 µM   | MCF7 | 0 | -0.076 | -0.241 | 6925 |
| 713  | amiodarone                  | 6 µM   | PC3  | 0 | -0.076 | -0.214 | 4657 |
| 653  | dequalinium chloride        | 8 µM   | MCF7 | 0 | -0.077 | -0.185 | 2631 |
| 626  | alpha-estradiol             | 10 nM  | MCF7 | 0 | -0.077 | -0.127 | 1635 |
| 622  | alprenolol                  | 14 µM  | HL60 | 0 | -0.077 | -0.143 | 1571 |
| 1065 | lomustine                   | 100 µM | PC3  | 0 | -0.077 | -0.258 | 7050 |
| 653  | testosterone                | 12 µM  | MCF7 | 0 | -0.077 | -0.168 | 2649 |



|      |                        |        |      |   |        |        |      |
|------|------------------------|--------|------|---|--------|--------|------|
| 660  | terguride              | 9 µM   | HL60 | 0 | -0.077 | -0.248 | 3096 |
| 603  | valproic acid          | 500 µM | PC3  | 0 | -0.077 | -0.14  | 1240 |
| 633  | famotidine             | 12 µM  | MCF7 | 0 | -0.077 | -0.104 | 1529 |
| 762  | gliquidone             | 8 µM   | PC3  | 0 | -0.077 | -0.114 | 7301 |
| 640  | parthenolide           | 16 µM  | HL60 | 0 | -0.077 | -0.193 | 1736 |
| 619  | niflumic acid          | 14 µM  | HL60 | 0 | -0.077 | -0.158 | 2399 |
| 645  | bromopride             | 12 µM  | HL60 | 0 | -0.077 | -0.16  | 2182 |
| 646  | clomipramine           | 11 µM  | MCF7 | 0 | -0.077 | -0.173 | 3182 |
| 750  | wortmannin             | 10 nM  | HL60 | 0 | -0.077 | -0.175 | 6202 |
| 635  | terconazole            | 8 µM   | HL60 | 0 | -0.077 | -0.192 | 2484 |
| 698  | alexidine              | 7 µM   | PC3  | 0 | -0.077 | -0.179 | 7397 |
| 745  | cefepime               | 7 µM   | MCF7 | 0 | -0.077 | -0.185 | 6237 |
| 725  | sirolimus              | 100 nM | MCF7 | 0 | -0.077 | -0.253 | 5218 |
| 44   | sodium phenylbutyrate  | 1 mM   | HL60 | 0 | -0.077 | -0.105 | 411  |
| 5    | dexamethasone          | 1 µM   | MCF7 | 0 | -0.077 | -0.166 | 123  |
| 514  | doxycycline            | 14 µM  | MCF7 | 0 | -0.077 | -0.128 | 1113 |
| 720  | flutamide              | 14 µM  | MCF7 | 0 | -0.077 | -0.137 | 4361 |
| 712  | zimeldine              | 10 µM  | PC3  | 0 | -0.077 | -0.209 | 4609 |
| 670  | lithocholic acid       | 11 µM  | MCF7 | 0 | -0.077 | -0.214 | 3433 |
| 648  | ricinine               | 24 µM  | HL60 | 0 | -0.078 | -0.137 | 2505 |
| 619  | triprolidine           | 13 µM  | HL60 | 0 | -0.078 | -0.179 | 2376 |
| 680  | ofloxacin              | 11 µM  | PC3  | 0 | -0.078 | -0.081 | 3673 |
| 748  | isoconazole            | 10 µM  | MCF7 | 0 | -0.078 | -0.208 | 7211 |
| 1010 | PF-00562151-00         | 10 µM  | MCF7 | 0 | -0.078 | -0.097 | 5954 |
| 736  | trifluoperazine        | 8 µM   | MCF7 | 0 | -0.078 | -0.243 | 5442 |
| 720  | chlorambucil           | 13 µM  | MCF7 | 0 | -0.078 | -0.161 | 4345 |
| 752  | napelline              | 11 µM  | MCF7 | 0 | -0.078 | -0.136 | 6084 |
| 35   | trichostatin A         | 100 nM | HL60 | 0 | -0.078 | -0.099 | 364  |
| 761  | asiaticoside           | 4 µM   | PC3  | 0 | -0.078 | -0.12  | 7244 |
| 664  | trichostatin A         | 100 nM | HL60 | 0 | -0.078 | -0.166 | 2904 |
| 681  | sulfamethoxypyridazine | 14 µM  | PC3  | 0 | -0.078 | -0.201 | 3711 |
| 612  | sulfathiazole          | 16 µM  | HL60 | 0 | -0.078 | -0.177 | 1963 |
| 720  | beta-escin             | 3 µM   | MCF7 | 0 | -0.078 | -0.132 | 4364 |
| 612  | levodopa               | 20 µM  | HL60 | 0 | -0.078 | -0.124 | 1972 |
| 1004 | pioglitazone           | 10 µM  | MCF7 | 0 | -0.078 | -0.11  | 5925 |
| 719  | prednisolone           | 11 µM  | PC3  | 0 | -0.078 | -0.209 | 5101 |
| 1045 | dinoprostone           | 10 µM  | MCF7 | 0 | -0.078 | -0.19  | 6590 |

|     |                   |        |      |   |        |        |      |
|-----|-------------------|--------|------|---|--------|--------|------|
| 615 | alverine          | 8 µM   | HL60 | 0 | -0.078 | -0.165 | 1426 |
| 756 | enilconazole      | 13 µM  | MCF7 | 0 | -0.078 | -0.203 | 6518 |
| 771 | difenidol         | 12 µM  | MCF7 | 0 | -0.078 | -0.208 | 7406 |
| 636 | dihydroergotamine | 3 µM   | MCF7 | 0 | -0.079 | -0.119 | 2244 |
| 646 | albendazole       | 15 µM  | MCF7 | 0 | -0.079 | -0.182 | 3164 |
| 633 | haloperidol       | 11 µM  | MCF7 | 0 | -0.079 | -0.146 | 1539 |
| 706 | Prestwick-682     | 6 µM   | MCF7 | 0 | -0.079 | -0.221 | 4984 |
| 634 | epiandrosterone   | 14 µM  | HL60 | 0 | -0.079 | -0.179 | 2444 |
| 653 | guanfacine        | 14 µM  | MCF7 | 0 | -0.079 | -0.204 | 2634 |
| 694 | hydroxyachillin   | 14 µM  | MCF7 | 0 | -0.079 | -0.135 | 4797 |
| 767 | estradiol         | 100 nM | MCF7 | 0 | -0.079 | -0.148 | 6928 |
| 671 | hecogenin         | 9 µM   | MCF7 | 0 | -0.079 | -0.197 | 3457 |
| 82  | novobiocin        | 100 µM | MCF7 | 0 | -0.079 | -0.179 | 576  |
| 695 | orciprenaline     | 8 µM   | MCF7 | 0 | -0.079 | -0.127 | 4831 |
| 746 | mephenytoin       | 18 µM  | MCF7 | 0 | -0.079 | -0.154 | 6275 |
| 754 | sulfasalazine     | 10 µM  | PC3  | 0 | -0.079 | -0.12  | 6346 |
| 762 | phenindione       | 18 µM  | PC3  | 0 | -0.079 | -0.206 | 7289 |
| 756 | trapidil          | 19 µM  | MCF7 | 0 | -0.079 | -0.149 | 6515 |
| 732 | spironolactone    | 10 µM  | PC3  | 0 | -0.079 | -0.184 | 5781 |
| 755 | urapidil          | 9 µM   | MCF7 | 0 | -0.079 | -0.219 | 6455 |
| 714 | cisapride         | 9 µM   | PC3  | 0 | -0.079 | -0.158 | 6706 |
| 642 | dilazep           | 6 µM   | MCF7 | 0 | -0.079 | -0.211 | 2294 |
| 651 | azlocillin        | 8 µM   | HL60 | 0 | -0.079 | -0.122 | 2727 |
| 645 | famprofazone      | 11 µM  | HL60 | 0 | -0.079 | -0.241 | 2174 |
| 757 | tanespimycin      | 1 µM   | MCF7 | 0 | -0.079 | -0.167 | 5566 |
| 744 | acepromazine      | 9 µM   | MCF7 | 0 | -0.079 | -0.211 | 6832 |
| 752 | abamectin         | 5 µM   | MCF7 | 0 | -0.08  | -0.169 | 6081 |
| 748 | azaperone         | 12 µM  | MCF7 | 0 | -0.08  | -0.159 | 7231 |
| 750 | valproic acid     | 500 µM | HL60 | 0 | -0.08  | -0.231 | 6199 |
| 701 | 0179445-0000      | 1 µM   | PC3  | 0 | -0.08  | -0.189 | 4292 |
| 714 | propofol          | 22 µM  | PC3  | 0 | -0.08  | -0.187 | 6707 |
| 649 | tinidazole        | 16 µM  | HL60 | 0 | -0.08  | -0.227 | 2568 |
| 690 | cefotetan         | 7 µM   | MCF7 | 0 | -0.08  | -0.137 | 4116 |
| 671 | cefapirin         | 9 µM   | MCF7 | 0 | -0.08  | -0.132 | 3471 |
| 719 | gliclazide        | 12 µM  | PC3  | 0 | -0.08  | -0.267 | 5089 |
| 623 | sulfafurazole     | 15 µM  | HL60 | 0 | -0.08  | -0.158 | 1603 |
| 617 | oxymetazoline     | 13 µM  | PC3  | 0 | -0.08  | -0.159 | 2114 |

|      |                           |        |        |   |        |        |      |
|------|---------------------------|--------|--------|---|--------|--------|------|
| 701  | karakoline                | 11 µM  | PC3    | 0 | -0.08  | -0.094 | 4297 |
| 693  | sulfaguanidine            | 19 µM  | PC3    | 0 | -0.08  | -0.16  | 4257 |
| 60   | 15-delta prostaglandin J2 | 10 µM  | PC3    | 0 | -0.08  | -0.166 | 446  |
| 619  | trazodone                 | 10 µM  | HL60   | 0 | -0.08  | -0.214 | 2379 |
| 744  | clonidine                 | 15 µM  | MCF7   | 0 | -0.08  | -0.133 | 6814 |
| 631  | bacampicillin             | 8 µM   | HL60   | 0 | -0.08  | -0.158 | 1337 |
| 725  | alpha-estradiol           | 10 nM  | MCF7   | 0 | -0.08  | -0.168 | 5207 |
| 655  | meclozine                 | 9 µM   | MCF7   | 0 | -0.08  | -0.139 | 3285 |
| 727  | tanespimycin              | 1 µM   | PC3    | 0 | -0.08  | -0.173 | 4430 |
| 748  | pirenzepine               | 9 µM   | MCF7   | 0 | -0.08  | -0.127 | 7226 |
| 767  | haloperidol               | 10 µM  | MCF7   | 0 | -0.08  | -0.22  | 6923 |
| 641  | ipratropium bromide       | 10 µM  | HL60   | 0 | -0.08  | -0.248 | 1769 |
| 627  | benzonatate               | 7 µM   | MCF7   | 0 | -0.08  | -0.149 | 1679 |
| 749  | (-)-isoprenaline          | 16 µM  | HL60   | 0 | -0.08  | -0.095 | 6149 |
| 707  | clomifene                 | 7 µM   | MCF7   | 0 | -0.08  | -0.191 | 4994 |
| 671  | azlocillin                | 8 µM   | MCF7   | 0 | -0.08  | -0.185 | 3468 |
| 738  | rilmnidine                | 8 µM   | MCF7   | 0 | -0.08  | -0.115 | 5532 |
| 616  | triamcinolone             | 10 µM  | PC3    | 0 | -0.08  | -0.123 | 2078 |
| 70   | copper sulfate            | 100 µM | ssMCF7 | 0 | -0.08  | -0.078 | 500  |
| 732  | cefuroxime                | 9 µM   | PC3    | 0 | -0.08  | -0.159 | 5787 |
| 629  | procaine                  | 15 µM  | HL60   | 0 | -0.08  | -0.239 | 1838 |
| 502  | 5211181                   | 12 µM  | MCF7   | 0 | -0.08  | -0.192 | 950  |
| 645  | acacetin                  | 14 µM  | HL60   | 0 | -0.081 | -0.144 | 2189 |
| 735  | azacyclonol               | 15 µM  | MCF7   | 0 | -0.081 | -0.119 | 5398 |
| 1066 | 0316684-0000              | 10 µM  | MCF7   | 0 | -0.081 | -0.158 | 7052 |
| 688  | etifenin                  | 12 µM  | PC3    | 0 | -0.081 | -0.141 | 3998 |
| 660  | flurbiprofen              | 16 µM  | HL60   | 0 | -0.081 | -0.137 | 3095 |
| 729  | estradiol                 | 15 µM  | MCF7   | 0 | -0.081 | -0.21  | 5318 |
| 686  | dantrolene                | 12 µM  | MCF7   | 0 | -0.081 | -0.202 | 3867 |
| 1085 | daunorubicin              | 1 µM   | PC3    | 0 | -0.081 | -0.231 | 7511 |
| 746  | papaverine                | 11 µM  | MCF7   | 0 | -0.081 | -0.124 | 6245 |
| 659  | xamoterol                 | 5 µM   | HL60   | 0 | -0.081 | -0.147 | 3064 |
| 714  | estradiol                 | 15 µM  | PC3    | 0 | -0.081 | -0.156 | 6718 |
| 708  | tonzonium bromide         | 7 µM   | MCF7   | 0 | -0.081 | -0.143 | 5678 |
| 752  | benzethonium chloride     | 9 µM   | MCF7   | 0 | -0.081 | -0.174 | 6070 |
| 661  | chrysin                   | 16 µM  | HL60   | 0 | -0.081 | -0.231 | 3106 |
| 1082 | suramin sodium            | 10 µM  | MCF7   | 0 | -0.081 | -0.145 | 7496 |

|      |                      |        |      |   |        |        |      |
|------|----------------------|--------|------|---|--------|--------|------|
| 691  | trichostatin A       | 100 nM | MCF7 | 0 | -0.081 | -0.229 | 4153 |
| 756  | nipecotic acid       | 31 µM  | MCF7 | 0 | -0.081 | -0.246 | 6500 |
| 698  | halcinonide          | 9 µM   | PC3  | 0 | -0.081 | -0.179 | 7379 |
| 1082 | CP-944629            | 10 µM  | MCF7 | 0 | -0.081 | -0.133 | 7497 |
| 756  | gliquidone           | 8 µM   | MCF7 | 0 | -0.081 | -0.216 | 6505 |
| 629  | imipramine           | 13 µM  | HL60 | 0 | -0.081 | -0.248 | 1849 |
| 637  | chlorphenesin        | 16 µM  | MCF7 | 0 | -0.081 | -0.097 | 2279 |
| 683  | parbendazole         | 16 µM  | PC3  | 0 | -0.081 | -0.227 | 3799 |
| 689  | cefsulodin           | 7 µM   | PC3  | 0 | -0.081 | -0.144 | 4067 |
| 671  | vidarabine           | 15 µM  | MCF7 | 0 | -0.081 | -0.239 | 3445 |
| 649  | sulfadimidine        | 13 µM  | HL60 | 0 | -0.081 | -0.237 | 2560 |
| 629  | acetazolamide        | 18 µM  | HL60 | 0 | -0.082 | -0.2   | 1850 |
| 698  | mephentermine        | 9 µM   | PC3  | 0 | -0.082 | -0.129 | 7384 |
| 761  | dyclonine            | 12 µM  | PC3  | 0 | -0.082 | -0.199 | 7261 |
| 686  | deferoxamine         | 6 µM   | MCF7 | 0 | -0.082 | -0.162 | 3842 |
| 1019 | valdecoxib           | 10 µM  | PC3  | 0 | -0.082 | -0.095 | 6378 |
| 711  | deferoxamine         | 6 µM   | MCF7 | 0 | -0.082 | -0.175 | 3936 |
| 648  | phenazopyridine      | 16 µM  | HL60 | 0 | -0.082 | -0.159 | 2537 |
| 610  | minoxidil            | 19 µM  | PC3  | 0 | -0.082 | -0.119 | 1914 |
| 661  | adrenosterone        | 13 µM  | HL60 | 0 | -0.082 | -0.216 | 3107 |
| 633  | loperamide           | 8 µM   | MCF7 | 0 | -0.082 | -0.203 | 1533 |
| 748  | estriol              | 14 µM  | MCF7 | 0 | -0.082 | -0.17  | 7220 |
| 701  | PNU-0230031          | 10 µM  | PC3  | 0 | -0.082 | -0.19  | 4288 |
| 633  | cyproheptadine       | 12 µM  | MCF7 | 0 | -0.082 | -0.112 | 1521 |
| 689  | solanine             | 5 µM   | PC3  | 0 | -0.082 | -0.078 | 4087 |
| 626  | troglitazone         | 10 µM  | MCF7 | 0 | -0.082 | -0.163 | 1657 |
| 737  | flufenamic acid      | 14 µM  | MCF7 | 0 | -0.082 | -0.124 | 5478 |
| 631  | ciclosporin          | 3 µM   | HL60 | 0 | -0.082 | -0.227 | 1331 |
| 750  | tanespimycin         | 1 µM   | HL60 | 0 | -0.082 | -0.139 | 6185 |
| 647  | phenylpropanolamine  | 21 µM  | MCF7 | 0 | -0.082 | -0.163 | 3217 |
| 710  | edrophonium chloride | 20 µM  | PC3  | 0 | -0.082 | -0.17  | 6655 |
| 706  | miconazole           | 10 µM  | MCF7 | 0 | -0.082 | -0.202 | 4960 |
| 687  | oxaprozin            | 14 µM  | MCF7 | 0 | -0.082 | -0.174 | 3876 |
| 749  | kaempferol           | 14 µM  | HL60 | 0 | -0.082 | -0.151 | 6157 |
| 686  | promazine            | 12 µM  | MCF7 | 0 | -0.082 | -0.143 | 3833 |
| 718  | ifenprodil           | 8 µM   | PC3  | 0 | -0.082 | -0.225 | 5044 |
| 1030 | 5707885              | 50 µM  | MCF7 | 0 | -0.083 | -0.117 | 6433 |

|      |                             |        |        |   |        |        |      |
|------|-----------------------------|--------|--------|---|--------|--------|------|
| 671  | bergenin                    | 12 µM  | MCF7   | 0 | -0.083 | -0.13  | 3467 |
| 613  | cotinine                    | 23 µM  | HL60   | 0 | -0.083 | -0.139 | 2011 |
| 757  | thioridazine                | 10 µM  | MCF7   | 0 | -0.083 | -0.147 | 5590 |
| 2a   | metformin                   | 10 µM  | MCF7   | 0 | -0.083 | -0.102 | 61   |
| 707  | clorgiline                  | 13 µM  | MCF7   | 0 | -0.083 | -0.188 | 5005 |
| 63   | valproic acid               | 1 mM   | PC3    | 0 | -0.083 | -0.184 | 458  |
| 633  | bromocriptine               | 5 µM   | MCF7   | 0 | -0.083 | -0.203 | 1507 |
| 18   | LM-1685                     | 10 µM  | MCF7   | 0 | -0.083 | -0.162 | 253  |
| 715  | idazoxan                    | 17 µM  | PC3    | 0 | -0.083 | -0.135 | 6747 |
| 602  | chlorpromazine              | 1 µM   | HL60   | 0 | -0.083 | -0.244 | 1158 |
| 754  | protriptyline               | 13 µM  | PC3    | 0 | -0.083 | -0.19  | 6338 |
| 743  | acetylsalicylsalicylic acid | 13 µM  | MCF7   | 0 | -0.083 | -0.144 | 6778 |
| 689  | trimipramine                | 10 µM  | PC3    | 0 | -0.083 | -0.209 | 4083 |
| 664  | benzathine benzylpenicillin | 4 µM   | HL60   | 0 | -0.083 | -0.146 | 2939 |
| 758  | clioquinol                  | 13 µM  | MCF7   | 0 | -0.083 | -0.171 | 5623 |
| 640  | hydrastine hydrochloride    | 10 µM  | HL60   | 0 | -0.083 | -0.107 | 1740 |
| 730  | propranolol                 | 14 µM  | MCF7   | 0 | -0.083 | -0.248 | 5358 |
| 693  | succinylsulfathiazole       | 11 µM  | PC3    | 0 | -0.083 | -0.088 | 4265 |
| 646  | clofilium tosylate          | 8 µM   | MCF7   | 0 | -0.083 | -0.122 | 3187 |
| 637  | aceclofenac                 | 11 µM  | MCF7   | 0 | -0.083 | -0.137 | 2281 |
| 772  | dexpanthenol                | 19 µM  | MCF7   | 0 | -0.083 | -0.21  | 7455 |
| 40   | tanespimycin                | 1 µM   | MCF7   | 0 | -0.083 | -0.114 | 381  |
| 1076 | 0316684-0000                | 10 µM  | MCF7   | 0 | -0.083 | -0.186 | 7093 |
| 1091 | CP-319743                   | 10 µM  | PC3    | 0 | -0.083 | -0.17  | 7537 |
| 612  | ethambutol                  | 14 µM  | HL60   | 0 | -0.083 | -0.128 | 1981 |
| 1033 | PHA-00767505E               | 10 µM  | MCF7   | 0 | -0.084 | -0.137 | 6550 |
| 688  | etofenamate                 | 11 µM  | PC3    | 0 | -0.084 | -0.234 | 3989 |
| 746  | thiopropazine               | 6 µM   | MCF7   | 0 | -0.084 | -0.182 | 6265 |
| 761  | aminocaproic acid           | 30 µM  | PC3    | 0 | -0.084 | -0.213 | 7258 |
| 680  | salbutamol                  | 17 µM  | PC3    | 0 | -0.084 | -0.207 | 3677 |
| 603  | alvespimycin                | 100 nM | PC3    | 0 | -0.084 | -0.253 | 1213 |
| 627  | moxisylyte                  | 13 µM  | MCF7   | 0 | -0.084 | -0.184 | 1682 |
| 757  | fluphenazine                | 10 µM  | MCF7   | 0 | -0.084 | -0.21  | 5597 |
| 42   | alpha-estradiol             | 10 nM  | ssMCF7 | 0 | -0.084 | -0.154 | 403  |
| 645  | pempidine                   | 13 µM  | HL60   | 0 | -0.084 | -0.127 | 2172 |
| 58   | oxamic acid                 | 10 mM  | MCF7   | 0 | -0.084 | -0.156 | 439  |
| 714  | profenamine                 | 11 µM  | PC3    | 0 | -0.084 | -0.176 | 6697 |

|      |                           |        |      |   |        |        |      |
|------|---------------------------|--------|------|---|--------|--------|------|
| 730  | nilutamide                | 13 µM  | MCF7 | 0 | -0.084 | -0.265 | 5362 |
| 671  | pipenzolate bromide       | 9 µM   | MCF7 | 0 | -0.084 | -0.196 | 3460 |
| 107  | 4,5-dianilinophthalimide  | 10 µM  | MCF7 | 0 | -0.084 | -0.181 | 624  |
| 711  | acacetin                  | 14 µM  | MCF7 | 0 | -0.084 | -0.231 | 3942 |
| 715  | cyproheptadine            | 12 µM  | PC3  | 0 | -0.084 | -0.195 | 6740 |
| 746  | nicergoline               | 8 µM   | MCF7 | 0 | -0.084 | -0.197 | 6251 |
| 630  | androsterone              | 14 µM  | HL60 | 0 | -0.084 | -0.204 | 1296 |
| 749  | estriol                   | 14 µM  | HL60 | 0 | -0.084 | -0.265 | 6140 |
| 651  | methazolamide             | 17 µM  | HL60 | 0 | -0.084 | -0.224 | 2733 |
| 746  | propidium iodide          | 6 µM   | MCF7 | 0 | -0.084 | -0.237 | 6277 |
| 660  | prazosin                  | 10 µM  | HL60 | 0 | -0.084 | -0.237 | 3098 |
| 1054 | 0297417-0002B             | 10 µM  | PC3  | 0 | -0.084 | -0.168 | 6895 |
| 725  | chlorpromazine            | 1 µM   | MCF7 | 0 | -0.084 | -0.192 | 5214 |
| 681  | cloperastine              | 11 µM  | PC3  | 0 | -0.084 | -0.234 | 3710 |
| 86   | 4,5-dianilinophthalimide  | 10 µM  | PC3  | 0 | -0.084 | -0.095 | 578  |
| 741  | isotretinoin              | 13 µM  | MCF7 | 0 | -0.084 | -0.17  | 6017 |
| 1004 | sirolimus                 | 100 nM | MCF7 | 0 | -0.084 | -0.202 | 5927 |
| 626  | nordihydroguaiaretic acid | 1 µM   | MCF7 | 0 | -0.084 | -0.206 | 1648 |
| 615  | pentoxifylline            | 14 µM  | HL60 | 0 | -0.084 | -0.139 | 1444 |
| 626  | clozapine                 | 10 µM  | MCF7 | 0 | -0.084 | -0.188 | 1654 |
| 714  | puromycin                 | 7 µM   | PC3  | 0 | -0.085 | -0.124 | 6711 |
| 629  | nifedipine                | 12 µM  | HL60 | 0 | -0.085 | -0.24  | 1856 |
| 656  | nifuroxazide              | 15 µM  | MCF7 | 0 | -0.085 | -0.157 | 2850 |
| 610  | sulfaguanidine            | 19 µM  | PC3  | 0 | -0.085 | -0.135 | 1913 |
| 504  | depudecin                 | 1 µM   | MCF7 | 0 | -0.085 | -0.195 | 874  |
| 738  | mefenamic acid            | 17 µM  | MCF7 | 0 | -0.085 | -0.142 | 5534 |
| 629  | acetoexamide              | 12 µM  | HL60 | 0 | -0.085 | -0.142 | 1870 |
| 648  | hexestrol                 | 15 µM  | HL60 | 0 | -0.085 | -0.183 | 2515 |
| 659  | ethaverine                | 9 µM   | HL60 | 0 | -0.085 | -0.225 | 3037 |
| 715  | ergocalciferol            | 10 µM  | PC3  | 0 | -0.085 | -0.162 | 6746 |
| 637  | nimesulide                | 13 µM  | MCF7 | 0 | -0.085 | -0.137 | 2275 |
| 670  | bendroflumethiazide       | 9 µM   | MCF7 | 0 | -0.085 | -0.148 | 3415 |
| 19   | dexamethasone             | 1 µM   | MCF7 | 0 | -0.085 | -0.092 | 255  |
| 744  | cefalotin                 | 10 µM  | MCF7 | 0 | -0.085 | -0.167 | 6819 |
| 641  | aconitine                 | 6 µM   | HL60 | 0 | -0.085 | -0.115 | 1784 |
| 746  | tropine                   | 28 µM  | MCF7 | 0 | -0.085 | -0.22  | 6264 |
| 627  | metrifonate               | 16 µM  | MCF7 | 0 | -0.085 | -0.117 | 1675 |

|      |                                 |        |        |   |        |        |      |
|------|---------------------------------|--------|--------|---|--------|--------|------|
| 642  | riluzole                        | 15 µM  | MCF7   | 0 | -0.085 | -0.22  | 2295 |
| 506  | genistein                       | 10 µM  | MCF7   | 0 | -0.085 | -0.217 | 1015 |
| 727  | fluphenazine                    | 10 µM  | PC3    | 0 | -0.085 | -0.201 | 4461 |
| 641  | tetrahydroalstonine             | 11 µM  | HL60   | 0 | -0.085 | -0.139 | 1756 |
| 767  | alpha-estradiol                 | 10 nM  | MCF7   | 0 | -0.085 | -0.167 | 6930 |
| 749  | cyproterone                     | 10 µM  | HL60   | 0 | -0.085 | -0.128 | 6124 |
| 603  | monorden                        | 100 nM | PC3    | 0 | -0.085 | -0.241 | 1219 |
| 682  | acacetin                        | 14 µM  | PC3    | 0 | -0.085 | -0.22  | 3767 |
| 655  | metixene                        | 12 µM  | MCF7   | 0 | -0.085 | -0.123 | 3313 |
| 640  | raubasine                       | 10 µM  | HL60   | 0 | -0.086 | -0.091 | 1748 |
| 746  | ifosfamide                      | 15 µM  | MCF7   | 0 | -0.086 | -0.161 | 6279 |
| 693  | picrotoxinin                    | 14 µM  | PC3    | 0 | -0.086 | -0.131 | 4260 |
| 1088 | 15(S)-15-methylprostaglandin E2 | 10 µM  | MCF7   | 0 | -0.086 | -0.133 | 7521 |
| 731  | phenazopyridine                 | 16 µM  | PC3    | 0 | -0.086 | -0.18  | 5758 |
| 612  | pyrimethamine                   | 16 µM  | HL60   | 0 | -0.086 | -0.162 | 1974 |
| 634  | bisacodyl                       | 11 µM  | HL60   | 0 | -0.086 | -0.216 | 2435 |
| 630  | dequalinium chloride            | 8 µM   | HL60   | 0 | -0.086 | -0.213 | 1276 |
| 736  | benzonatate                     | 7 µM   | MCF7   | 0 | -0.086 | -0.122 | 5435 |
| 504  | prazosin                        | 10 µM  | MCF7   | 0 | -0.086 | -0.202 | 826  |
| 725  | fulvestrant                     | 10 nM  | MCF7   | 0 | -0.086 | -0.152 | 5235 |
| 611  | famotidine                      | 12 µM  | PC3    | 0 | -0.086 | -0.125 | 1946 |
| 692  | trichostatin A                  | 100 nM | PC3    | 0 | -0.086 | -0.173 | 4184 |
| 718  | trichostatin A                  | 100 nM | PC3    | 0 | -0.086 | -0.205 | 5065 |
| 746  | azlocillin                      | 8 µM   | MCF7   | 0 | -0.086 | -0.176 | 6262 |
| 617  | trichostatin A                  | 100 nM | PC3    | 0 | -0.086 | -0.199 | 2105 |
| 727  | nordihydroguaiaretic acid       | 1 µM   | PC3    | 0 | -0.086 | -0.18  | 4447 |
| 712  | dioxybenzone                    | 16 µM  | PC3    | 0 | -0.086 | -0.108 | 4638 |
| 712  | epiandrosterone                 | 14 µM  | PC3    | 0 | -0.086 | -0.164 | 4626 |
| 615  | antimycin A                     | 7 µM   | HL60   | 0 | -0.086 | -0.182 | 1414 |
| 73   | wortmannin                      | 10 nM  | SKMEL5 | 0 | -0.086 | -0.128 | 506  |
| 741  | homochlorcyclizine              | 10 µM  | MCF7   | 0 | -0.087 | -0.232 | 5998 |
| 13   | raloxifene                      | 100 nM | MCF7   | 0 | -0.087 | -0.089 | 202  |
| 109  | benserazide                     | 10 µM  | SKMEL5 | 0 | -0.087 | -0.115 | 631  |
| 672  | theobromine                     | 22 µM  | MCF7   | 0 | -0.087 | -0.144 | 3334 |
| 660  | nimodipine                      | 10 µM  | HL60   | 0 | -0.087 | -0.179 | 3103 |
| 611  | trichostatin A                  | 100 nM | PC3    | 0 | -0.087 | -0.176 | 1951 |
| 728  | astemizole                      | 9 µM   | PC3    | 0 | -0.087 | -0.209 | 4471 |

|      |                       |        |      |   |        |        |      |
|------|-----------------------|--------|------|---|--------|--------|------|
| 656  | pentamidine           | 7 µM   | MCF7 | 0 | -0.087 | -0.116 | 2834 |
| 727  | monorden              | 100 nM | PC3  | 0 | -0.087 | -0.189 | 4443 |
| 754  | S-propranolol         | 14 µM  | PC3  | 0 | -0.087 | -0.14  | 6343 |
| 708  | bepiridil             | 10 µM  | MCF7 | 0 | -0.087 | -0.139 | 5674 |
| 649  | meclofenoxate         | 14 µM  | HL60 | 0 | -0.087 | -0.232 | 2546 |
| 757  | troglitazone          | 10 µM  | MCF7 | 0 | -0.087 | -0.131 | 5592 |
| 747  | mifepristone          | 9 µM   | MCF7 | 0 | -0.087 | -0.115 | 7183 |
| 693  | tolazoline            | 20 µM  | PC3  | 0 | -0.087 | -0.171 | 4262 |
| 765  | alvespimycin          | 100 nM | MCF7 | 0 | -0.087 | -0.2   | 6973 |
| 754  | pyrvinium             | 3 µM   | PC3  | 0 | -0.087 | -0.137 | 6339 |
| 648  | tetryzoline           | 17 µM  | HL60 | 0 | -0.087 | -0.15  | 2507 |
| 649  | dicoumarol            | 12 µM  | HL60 | 0 | -0.087 | -0.226 | 2561 |
| 660  | rolipram              | 15 µM  | HL60 | 0 | -0.087 | -0.109 | 3072 |
| 655  | amiodarone            | 6 µM   | MCF7 | 0 | -0.087 | -0.183 | 3296 |
| 729  | phenylpropanolamine   | 21 µM  | MCF7 | 0 | -0.087 | -0.23  | 5298 |
| 727  | fulvestrant           | 10 nM  | PC3  | 0 | -0.087 | -0.101 | 4462 |
| 7    | exemestane            | 10 nM  | MCF7 | 0 | -0.087 | -0.157 | 165  |
| 678  | dexpropranolol        | 14 µM  | MCF7 | 0 | -0.087 | -0.179 | 3553 |
| 707  | megestrol             | 10 µM  | MCF7 | 0 | -0.088 | -0.125 | 5013 |
| 664  | alprostadil           | 11 µM  | HL60 | 0 | -0.088 | -0.146 | 2938 |
| 618  | phenformin            | 17 µM  | HL60 | 0 | -0.088 | -0.176 | 2350 |
| 734  | pridinol              | 10 µM  | PC3  | 0 | -0.088 | -0.19  | 5860 |
| 66   | pirinixic acid        | 100 µM | PC3  | 0 | -0.088 | -0.109 | 481  |
| 695  | oxetacaine            | 9 µM   | MCF7 | 0 | -0.088 | -0.205 | 4829 |
| 673  | ethaverine            | 9 µM   | MCF7 | 0 | -0.088 | -0.208 | 3375 |
| 681  | phenformin            | 17 µM  | PC3  | 0 | -0.088 | -0.128 | 3725 |
| 1012 | LY-294002             | 10 µM  | MCF7 | 0 | -0.088 | -0.148 | 5965 |
| 729  | danazol               | 12 µM  | MCF7 | 0 | -0.088 | -0.218 | 5315 |
| 633  | zimeldine             | 10 µM  | MCF7 | 0 | -0.088 | -0.208 | 1512 |
| 689  | metacycline           | 8 µM   | PC3  | 0 | -0.088 | -0.091 | 4062 |
| 746  | methanthelium bromide | 10 µM  | MCF7 | 0 | -0.088 | -0.147 | 6254 |
| 611  | metolazone            | 11 µM  | PC3  | 0 | -0.088 | -0.141 | 1932 |
| 725  | fulvestrant           | 1 µM   | MCF7 | 0 | -0.088 | -0.258 | 5202 |
| 627  | triamterene           | 16 µM  | MCF7 | 0 | -0.088 | -0.155 | 1697 |
| 1051 | BAS-012416453         | 38 µM  | MCF7 | 0 | -0.088 | -0.149 | 6880 |
| 767  | geldanamycin          | 1 µM   | MCF7 | 0 | -0.088 | -0.243 | 6946 |
| 16   | SC-58125              | 10 µM  | MCF7 | 0 | -0.088 | -0.088 | 208  |



|      |                                         |        |      |   |        |        |      |
|------|-----------------------------------------|--------|------|---|--------|--------|------|
| 645  | flunisolide                             | 9 µM   | HL60 | 0 | -0.088 | -0.18  | 2168 |
| 658  | propranolol hydrochloride               | 9 µM   | HL60 | 0 | -0.088 | -0.207 | 3013 |
| 1066 | SB-202190                               | 1 µM   | MCF7 | 0 | -0.088 | -0.158 | 7054 |
| 623  | adenosine phosphate                     | 11 µM  | HL60 | 0 | -0.088 | -0.112 | 1622 |
| 655  | glycocholic acid                        | 9 µM   | MCF7 | 0 | -0.088 | -0.139 | 3315 |
| 671  | ribostamycin                            | 7 µM   | MCF7 | 0 | -0.088 | -0.206 | 3444 |
| 612  | hexamethonium bromide                   | 10 µM  | HL60 | 0 | -0.088 | -0.181 | 1982 |
| 762  | econazole                               | 9 µM   | PC3  | 0 | -0.088 | -0.114 | 7305 |
| 641  | 1,4-chrysenoquinone                     | 15 µM  | HL60 | 0 | -0.088 | -0.19  | 1773 |
| 731  | syrosingopine                           | 6 µM   | PC3  | 0 | -0.088 | -0.203 | 5733 |
| 694  | trichostatin A                          | 100 nM | MCF7 | 0 | -0.088 | -0.221 | 4770 |
| 637  | nifenazone                              | 13 µM  | MCF7 | 0 | -0.088 | -0.198 | 2285 |
| 46   | thioridazine                            | 10 µM  | MCF7 | 0 | -0.088 | -0.165 | 417  |
| 656  | 6-azathymine                            | 31 µM  | MCF7 | 0 | -0.089 | -0.227 | 2827 |
| 728  | clobetasol                              | 9 µM   | PC3  | 0 | -0.089 | -0.185 | 4497 |
| 693  | piperine                                | 14 µM  | PC3  | 0 | -0.089 | -0.103 | 4247 |
| 751  | beta-escin                              | 3 µM   | MCF7 | 0 | -0.089 | -0.15  | 6050 |
| 701  | trichostatin A                          | 100 nM | PC3  | 0 | -0.089 | -0.216 | 4302 |
| 619  | dimenhydrinate                          | 9 µM   | HL60 | 0 | -0.089 | -0.131 | 2400 |
| 767  | nordihydroguaiaretic acid               | 1 µM   | MCF7 | 0 | -0.089 | -0.183 | 6942 |
| 730  | ethaverine                              | 9 µM   | MCF7 | 0 | -0.089 | -0.243 | 5337 |
| 670  | deferoxamine                            | 6 µM   | MCF7 | 0 | -0.089 | -0.225 | 3417 |
| 505  | colforsin                               | 50 µM  | MCF7 | 0 | -0.089 | -0.197 | 913  |
| 744  | furosemide                              | 12 µM  | MCF7 | 0 | -0.089 | -0.125 | 6841 |
| 719  | resveratrol                             | 18 µM  | PC3  | 0 | -0.089 | -0.173 | 5084 |
| 725  | tanespimycin                            | 1 µM   | MCF7 | 0 | -0.089 | -0.203 | 5203 |
| 629  | sulfacetamide                           | 16 µM  | HL60 | 0 | -0.089 | -0.229 | 1859 |
| 505  | trifluoperazine                         | 10 µM  | MCF7 | 0 | -0.089 | -0.21  | 910  |
| 648  | sulfapyridine                           | 16 µM  | HL60 | 0 | -0.089 | -0.157 | 2538 |
| 29   | nitrendipine                            | 10 µM  | MCF7 | 0 | -0.089 | -0.13  | 336  |
| 1091 | 11-deoxy-16,16-dimethylprostaglandin E2 | 10 µM  | PC3  | 0 | -0.089 | -0.131 | 7538 |
| 703  | CP-320650-01                            | 10 µM  | PC3  | 0 | -0.089 | -0.126 | 4557 |
| 715  | fusidic acid                            | 7 µM   | PC3  | 0 | -0.089 | -0.13  | 6754 |
| 637  | oxolinic acid                           | 15 µM  | MCF7 | 0 | -0.089 | -0.174 | 2266 |
| 622  | oxytetracycline                         | 8 µM   | HL60 | 0 | -0.089 | -0.144 | 1553 |
| 619  | minocycline                             | 8 µM   | HL60 | 0 | -0.089 | -0.166 | 2405 |
| 746  | cinoxacin                               | 15 µM  | MCF7 | 0 | -0.089 | -0.114 | 6257 |

|      |                        |        |      |   |        |        |      |
|------|------------------------|--------|------|---|--------|--------|------|
| 658  | trichostatin A         | 100 nM | HL60 | 0 | -0.089 | -0.104 | 2993 |
| 1008 | monorden               | 100 nM | MCF7 | 0 | -0.089 | -0.171 | 5947 |
| 738  | cyclizine              | 13 µM  | MCF7 | 0 | -0.089 | -0.162 | 5525 |
| 710  | prasterone             | 12 µM  | PC3  | 0 | -0.089 | -0.149 | 6673 |
| 710  | maprotiline            | 13 µM  | PC3  | 0 | -0.089 | -0.145 | 6676 |
| 655  | dinoprost              | 8 µM   | MCF7 | 0 | -0.089 | -0.161 | 3308 |
| 741  | Trolox C               | 16 µM  | MCF7 | 0 | -0.09  | -0.138 | 6007 |
| 636  | ursolic acid           | 9 µM   | MCF7 | 0 | -0.09  | -0.147 | 2230 |
| 636  | terfenadine            | 8 µM   | MCF7 | 0 | -0.09  | -0.188 | 2227 |
| 659  | (+)-isoprenaline       | 11 µM  | HL60 | 0 | -0.09  | -0.1   | 3046 |
| 693  | zuclopenthixol         | 9 µM   | PC3  | 0 | -0.09  | -0.197 | 4261 |
| 726  | clenbuterol            | 13 µM  | MCF7 | 0 | -0.09  | -0.118 | 5266 |
| 687  | 2,6-dimethylpiperidine | 27 µM  | MCF7 | 0 | -0.09  | -0.111 | 3889 |
| 636  | picotamide             | 10 µM  | MCF7 | 0 | -0.09  | -0.118 | 2233 |
| 653  | naftidrofuryl          | 8 µM   | MCF7 | 0 | -0.09  | -0.138 | 2622 |
| 619  | trifluoperazine        | 8 µM   | HL60 | 0 | -0.09  | -0.213 | 2389 |
| 513  | LY-294002              | 10 µM  | MCF7 | 0 | -0.09  | -0.157 | 1065 |
| 55   | LY-294002              | 10 µM  | PC3  | 0 | -0.09  | -0.146 | 429  |
| 765  | prochlorperazine       | 10 µM  | MCF7 | 0 | -0.09  | -0.213 | 6975 |
| 623  | methotrexate           | 9 µM   | HL60 | 0 | -0.09  | -0.148 | 1599 |
| 613  | loperamide             | 8 µM   | HL60 | 0 | -0.09  | -0.141 | 2033 |
| 765  | tanespimycin           | 1 µM   | MCF7 | 0 | -0.09  | -0.257 | 6966 |
| 715  | caffeic acid           | 22 µM  | PC3  | 0 | -0.09  | -0.118 | 6753 |
| 746  | mianserin              | 13 µM  | MCF7 | 0 | -0.09  | -0.16  | 6260 |
| 633  | dehydrocholic acid     | 10 µM  | MCF7 | 0 | -0.09  | -0.148 | 1523 |
| 683  | beta-escin             | 3 µM   | PC3  | 0 | -0.09  | -0.156 | 3807 |
| 613  | cyproheptadine         | 12 µM  | HL60 | 0 | -0.09  | -0.213 | 2021 |
| 646  | clotrimazole           | 12 µM  | MCF7 | 0 | -0.09  | -0.174 | 3166 |
| 626  | prochlorperazine       | 10 µM  | MCF7 | 0 | -0.09  | -0.144 | 1640 |
| 1081 | semustine              | 100 µM | PC3  | 0 | -0.09  | -0.183 | 7492 |
| 654  | SR-95639A              | 10 µM  | MCF7 | 0 | -0.09  | -0.145 | 3272 |
| 720  | homosalate             | 15 µM  | MCF7 | 0 | -0.09  | -0.115 | 4355 |
| 771  | cortisone              | 11 µM  | MCF7 | 0 | -0.09  | -0.167 | 7416 |
| 682  | promazine              | 12 µM  | PC3  | 0 | -0.09  | -0.179 | 3752 |
| 719  | phensuximide           | 21 µM  | PC3  | 0 | -0.09  | -0.108 | 5097 |
| 741  | nortriptyline          | 13 µM  | MCF7 | 0 | -0.09  | -0.202 | 6003 |
| 641  | racecadotril           | 10 µM  | HL60 | 0 | -0.09  | -0.149 | 1782 |

|      |                         |        |      |   |        |        |      |
|------|-------------------------|--------|------|---|--------|--------|------|
| 752  | hexestrol               | 15 µM  | MCF7 | 0 | -0.09  | -0.208 | 6077 |
| 707  | amoxapine               | 13 µM  | MCF7 | 0 | -0.091 | -0.212 | 4996 |
| 752  | estropipate             | 9 µM   | MCF7 | 0 | -0.091 | -0.127 | 6068 |
| 671  | dienestrol              | 15 µM  | MCF7 | 0 | -0.091 | -0.144 | 3448 |
| 513  | tanespimycin            | 1 µM   | MCF7 | 0 | -0.091 | -0.218 | 1056 |
| 648  | cefalotin               | 10 µM  | HL60 | 0 | -0.091 | -0.238 | 2517 |
| 687  | chlorcyclizine          | 12 µM  | MCF7 | 0 | -0.091 | -0.137 | 3893 |
| 1049 | fulvestrant             | 1 µM   | MCF7 | 0 | -0.091 | -0.153 | 6872 |
| 659  | sulconazole             | 9 µM   | HL60 | 0 | -0.091 | -0.223 | 3035 |
| 756  | pirindole               | 12 µM  | MCF7 | 0 | -0.091 | -0.206 | 6519 |
| 618  | phenelzine              | 17 µM  | HL60 | 0 | -0.091 | -0.184 | 2357 |
| 741  | phenindione             | 18 µM  | MCF7 | 0 | -0.091 | -0.143 | 5991 |
| 626  | LY-294002               | 10 µM  | MCF7 | 0 | -0.091 | -0.189 | 1652 |
| 1084 | pioglitazone            | 10 µM  | MCF7 | 0 | -0.091 | -0.115 | 7506 |
| 506  | trogliatzone            | 10 µM  | MCF7 | 0 | -0.091 | -0.175 | 1012 |
| 758  | 3-hydroxy-DL-kynurenine | 18 µM  | MCF7 | 0 | -0.091 | -0.193 | 5641 |
| 726  | cotinine                | 23 µM  | MCF7 | 0 | -0.092 | -0.195 | 5246 |
| 1052 | AG-012559               | 10 µM  | PC3  | 0 | -0.092 | -0.14  | 6884 |
| 656  | quercetin               | 12 µM  | MCF7 | 0 | -0.092 | -0.135 | 2859 |
| 650  | tanespimycin            | 1 µM   | HL60 | 0 | -0.092 | -0.133 | 2666 |
| 741  | nifedipine              | 12 µM  | MCF7 | 0 | -0.092 | -0.194 | 6006 |
| 1073 | MG-262                  | 100 nM | PC3  | 0 | -0.092 | -0.136 | 7079 |
| 712  | terguride               | 9 µM   | PC3  | 0 | -0.092 | -0.089 | 4633 |
| 651  | pipenzolate bromide     | 9 µM   | HL60 | 0 | -0.092 | -0.2   | 2719 |
| 687  | PHA-00745360            | 10 µM  | MCF7 | 0 | -0.092 | -0.154 | 3907 |
| 670  | eucatropine             | 12 µM  | MCF7 | 0 | -0.092 | -0.171 | 3416 |
| 1068 | GW-8510                 | 10 µM  | MCF7 | 0 | -0.092 | -0.276 | 7062 |
| 671  | ebselen                 | 15 µM  | MCF7 | 0 | -0.092 | -0.235 | 3458 |
| 745  | mefloquine              | 10 µM  | MCF7 | 0 | -0.092 | -0.166 | 6205 |
| 718  | prenylamine             | 10 µM  | PC3  | 0 | -0.092 | -0.191 | 5070 |
| 692  | benperidol              | 10 µM  | PC3  | 0 | -0.092 | -0.133 | 4196 |
| 737  | allantoin               | 25 µM  | MCF7 | 0 | -0.092 | -0.143 | 5471 |
| 506  | tretinoin               | 1 µM   | MCF7 | 0 | -0.092 | -0.222 | 991  |
| 647  | colchicine              | 10 µM  | MCF7 | 0 | -0.092 | -0.12  | 3213 |
| 653  | bezafibrate             | 11 µM  | MCF7 | 0 | -0.092 | -0.189 | 2630 |
| 748  | fluphenazine            | 8 µM   | MCF7 | 0 | -0.092 | -0.116 | 7234 |
| 641  | folic acid              | 9 µM   | HL60 | 0 | -0.092 | -0.129 | 1790 |

|      |                                  |        |        |   |        |        |      |
|------|----------------------------------|--------|--------|---|--------|--------|------|
| 744  | sertaconazole                    | 8 µM   | MCF7   | 0 | -0.092 | -0.194 | 6811 |
| 1088 | suramin sodium                   | 10 µM  | MCF7   | 0 | -0.092 | -0.158 | 7524 |
| 59   | clofibrate                       | 100 µM | MCF7   | 0 | -0.092 | -0.108 | 444  |
| 603  | LY-294002                        | 10 µM  | PC3    | 0 | -0.093 | -0.207 | 1236 |
| 734  | repaglinide                      | 9 µM   | PC3    | 0 | -0.093 | -0.161 | 5862 |
| 708  | perphenazine                     | 10 µM  | MCF7   | 0 | -0.093 | -0.103 | 5698 |
| 693  | oxetacaine                       | 9 µM   | PC3    | 0 | -0.093 | -0.14  | 4246 |
| 720  | rifabutin                        | 5 µM   | MCF7   | 0 | -0.093 | -0.218 | 4349 |
| 505  | docosahexaenoic acid ethyl ester | 100 µM | MCF7   | 0 | -0.093 | -0.121 | 881  |
| 653  | mimosine                         | 20 µM  | MCF7   | 0 | -0.093 | -0.108 | 2638 |
| 764  | methylprednisolone               | 11 µM  | PC3    | 0 | -0.093 | -0.158 | 7137 |
| 70   | tetraethylenepentamine           | 100 µM | ssMCF7 | 0 | -0.093 | -0.122 | 498  |
| 504  | carbamazepine                    | 100 nM | MCF7   | 0 | -0.093 | -0.211 | 835  |
| 636  | aminophenazone                   | 17 µM  | MCF7   | 0 | -0.093 | -0.153 | 2222 |
| 6    | chlorpropamide                   | 100 µM | MCF7   | 0 | -0.093 | -0.115 | 141  |
| 614  | dihydroergotamine                | 3 µM   | HL60   | 0 | -0.093 | -0.119 | 1398 |
| 771  | glafenine                        | 10 µM  | MCF7   | 0 | -0.093 | -0.148 | 7418 |
| 764  | trichostatin A                   | 100 nM | PC3    | 0 | -0.093 | -0.217 | 7136 |
| 98   | NU-1025                          | 100 µM | MCF7   | 0 | -0.093 | -0.123 | 608  |
| 681  | PNU-0230031                      | 10 µM  | PC3    | 0 | -0.093 | -0.104 | 3732 |
| 613  | apomorphine                      | 6 µM   | HL60   | 0 | -0.093 | -0.203 | 2005 |
| 678  | dorzolamide                      | 11 µM  | MCF7   | 0 | -0.093 | -0.217 | 3565 |
| 619  | pergolide                        | 10 µM  | HL60   | 0 | -0.093 | -0.122 | 2403 |
| 729  | monobenzone                      | 20 µM  | MCF7   | 0 | -0.093 | -0.257 | 5312 |
| 655  | pirenperone                      | 10 µM  | MCF7   | 0 | -0.093 | -0.174 | 3316 |
| 710  | fluspirilene                     | 8 µM   | PC3    | 0 | -0.093 | -0.182 | 6662 |
| 664  | zardaverine                      | 15 µM  | HL60   | 0 | -0.094 | -0.228 | 2926 |
| 729  | benserazide                      | 14 µM  | MCF7   | 0 | -0.094 | -0.211 | 5322 |
| 756  | tiletamine                       | 15 µM  | MCF7   | 0 | -0.094 | -0.182 | 6516 |
| 698  | dilazep                          | 6 µM   | PC3    | 0 | -0.094 | -0.134 | 7364 |
| 765  | sirolimus                        | 100 nM | MCF7   | 0 | -0.094 | -0.133 | 7001 |
| 671  | alimemazine                      | 5 µM   | MCF7   | 0 | -0.094 | -0.165 | 3478 |
| 708  | domperidone                      | 7 µM   | MCF7   | 0 | -0.094 | -0.135 | 5701 |
| 702  | mexiletine                       | 19 µM  | PC3    | 0 | -0.094 | -0.168 | 4338 |
| 20   | ciclosporin                      | 1 µM   | MCF7   | 0 | -0.094 | -0.116 | 261  |
| 772  | levamisole                       | 17 µM  | MCF7   | 0 | -0.094 | -0.249 | 7450 |
| 704  | N-acetylmuramic acid             | 14 µM  | PC3    | 0 | -0.094 | -0.129 | 4582 |

|      |                  |        |      |   |        |        |      |
|------|------------------|--------|------|---|--------|--------|------|
| 513  | prochlorperazine | 10 µM  | MCF7 | 0 | -0.094 | -0.214 | 1053 |
| 765  | LY-294002        | 10 µM  | MCF7 | 0 | -0.094 | -0.161 | 6995 |
| 738  | rimexolone       | 11 µM  | MCF7 | 0 | -0.094 | -0.203 | 5517 |
| 506  | tanespimycin     | 1 µM   | MCF7 | 0 | -0.094 | -0.219 | 986  |
| 612  | thioridazine     | 10 µM  | HL60 | 0 | -0.094 | -0.154 | 1986 |
| 622  | clonidine        | 15 µM  | HL60 | 0 | -0.094 | -0.154 | 1555 |
| 1032 | 5155877          | 10 µM  | PC3  | 0 | -0.094 | -0.195 | 6544 |
| 623  | metitepine       | 8 µM   | HL60 | 0 | -0.094 | -0.17  | 1616 |
| 82   | copper sulfate   | 100 µM | MCF7 | 0 | -0.094 | -0.089 | 575  |
| 732  | papaverine       | 11 µM  | PC3  | 0 | -0.094 | -0.122 | 5769 |
| 745  | alclometasone    | 8 µM   | MCF7 | 0 | -0.094 | -0.205 | 6229 |
| 756  | depropine        | 8 µM   | MCF7 | 0 | -0.094 | -0.233 | 6523 |
| 1003 | thioridazine     | 10 µM  | PC3  | 0 | -0.095 | -0.188 | 5921 |
| 653  | bepidil          | 10 µM  | MCF7 | 0 | -0.095 | -0.151 | 2629 |
| 648  | etanidazole      | 19 µM  | HL60 | 0 | -0.095 | -0.216 | 2510 |
| 754  | trifluoperazine  | 8 µM   | PC3  | 0 | -0.095 | -0.232 | 6341 |
| 771  | ifenprodil       | 8 µM   | MCF7 | 0 | -0.095 | -0.191 | 7404 |
| 700  | medrysone        | 12 µM  | MCF7 | 0 | -0.095 | -0.199 | 4727 |
| 736  | raubasine        | 10 µM  | MCF7 | 0 | -0.095 | -0.138 | 5459 |
| 736  | amitriptyline    | 13 µM  | MCF7 | 0 | -0.095 | -0.174 | 5453 |
| 611  | erythromycin     | 5 µM   | PC3  | 0 | -0.095 | -0.112 | 1928 |
| 513  | tanespimycin     | 1 µM   | MCF7 | 0 | -0.095 | -0.218 | 1064 |
| 640  | gliclazide       | 12 µM  | HL60 | 0 | -0.095 | -0.199 | 1720 |
| 681  | hydralazine      | 20 µM  | PC3  | 0 | -0.095 | -0.115 | 3724 |
| 725  | LY-294002        | 10 µM  | MCF7 | 0 | -0.095 | -0.159 | 5224 |
| 502  | tanespimycin     | 1 µM   | MCF7 | 0 | -0.095 | -0.184 | 947  |
| 29   | nifedipine       | 10 µM  | MCF7 | 0 | -0.095 | -0.173 | 335  |
| 614  | spironolactone   | 10 µM  | HL60 | 0 | -0.095 | -0.149 | 1380 |
| 706  | lovastatin       | 10 µM  | MCF7 | 0 | -0.095 | -0.125 | 4978 |
| 678  | trifluridine     | 14 µM  | MCF7 | 0 | -0.095 | -0.184 | 3559 |
| 603  | thioridazine     | 10 µM  | PC3  | 0 | -0.095 | -0.191 | 1230 |
| 726  | equilin          | 15 µM  | MCF7 | 0 | -0.095 | -0.184 | 5255 |
| 619  | norethisterone   | 13 µM  | HL60 | 0 | -0.095 | -0.223 | 2383 |
| 713  | pentoxyverine    | 8 µM   | PC3  | 0 | -0.095 | -0.207 | 4649 |
| 661  | Prestwick-920    | 14 µM  | HL60 | 0 | -0.095 | -0.128 | 3118 |
| 640  | mesoridazine     | 7 µM   | HL60 | 0 | -0.095 | -0.135 | 1725 |
| 700  | levonorgestrel   | 13 µM  | MCF7 | 0 | -0.096 | -0.14  | 4730 |

|      |                       |        |      |   |        |        |      |
|------|-----------------------|--------|------|---|--------|--------|------|
| 726  | alfuzosin             | 9 µM   | MCF7 | 0 | -0.096 | -0.206 | 5242 |
| 642  | metoclopramide        | 12 µM  | MCF7 | 0 | -0.096 | -0.165 | 2315 |
| 612  | trichostatin A        | 100 nM | HL60 | 0 | -0.096 | -0.16  | 1971 |
| 756  | alfadolone            | 10 µM  | MCF7 | 0 | -0.096 | -0.163 | 6506 |
| 629  | trichostatin A        | 100 nM | HL60 | 0 | -0.096 | -0.326 | 1835 |
| 514  | phenanthridinone      | 51 µM  | MCF7 | 0 | -0.096 | -0.145 | 1115 |
| 767  | monorden              | 100 nM | MCF7 | 0 | -0.096 | -0.232 | 6938 |
| 726  | methyl dopa           | 19 µM  | MCF7 | 0 | -0.096 | -0.224 | 5272 |
| 772  | dirithromycin         | 5 µM   | MCF7 | 0 | -0.096 | -0.23  | 7446 |
| 746  | fluorometholone       | 11 µM  | MCF7 | 0 | -0.096 | -0.163 | 6247 |
| 738  | flumequine            | 15 µM  | MCF7 | 0 | -0.096 | -0.126 | 5529 |
| 1069 | MG-262                | 100 nM | PC3  | 0 | -0.096 | -0.125 | 7068 |
| 737  | etofylline            | 18 µM  | MCF7 | 0 | -0.097 | -0.124 | 5467 |
| 610  | trichostatin A        | 100 nM | PC3  | 0 | -0.097 | -0.201 | 1891 |
| 727  | troglitazone          | 10 µM  | PC3  | 0 | -0.097 | -0.169 | 4456 |
| 725  | sirolimus             | 100 nM | MCF7 | 0 | -0.097 | -0.141 | 5204 |
| 714  | desipramine           | 13 µM  | PC3  | 0 | -0.097 | -0.132 | 6693 |
| 757  | sirolimus             | 100 nM | MCF7 | 0 | -0.097 | -0.181 | 5581 |
| 681  | medrysone             | 12 µM  | PC3  | 0 | -0.097 | -0.201 | 3705 |
| 640  | tubocurarine chloride | 5 µM   | HL60 | 0 | -0.097 | -0.191 | 1738 |
| 756  | remoxipride           | 10 µM  | MCF7 | 0 | -0.097 | -0.248 | 6503 |
| 655  | cisapride             | 9 µM   | MCF7 | 0 | -0.097 | -0.155 | 3305 |
| 765  | tanespimycin          | 1 µM   | MCF7 | 0 | -0.097 | -0.224 | 6978 |
| 688  | fluticasone           | 8 µM   | PC3  | 0 | -0.097 | -0.14  | 4011 |
| 771  | flunarizine           | 8 µM   | MCF7 | 0 | -0.097 | -0.147 | 7412 |
| 713  | naloxone              | 11 µM  | PC3  | 0 | -0.097 | -0.246 | 4645 |
| 513  | LY-294002             | 10 µM  | MCF7 | 0 | -0.097 | -0.159 | 1077 |
| 735  | nicardipine           | 8 µM   | MCF7 | 0 | -0.097 | -0.19  | 5397 |
| 754  | trichostatin A        | 100 nM | PC3  | 0 | -0.097 | -0.196 | 6340 |
| 678  | cycloserine           | 39 µM  | MCF7 | 0 | -0.097 | -0.234 | 3562 |
| 715  | nilutamide            | 13 µM  | PC3  | 0 | -0.097 | -0.087 | 6763 |
| 731  | mefloquine            | 10 µM  | PC3  | 0 | -0.097 | -0.217 | 5724 |
| 691  | diflorasone           | 8 µM   | MCF7 | 0 | -0.097 | -0.106 | 4158 |
| 691  | trimipramine          | 10 µM  | MCF7 | 0 | -0.097 | -0.19  | 4163 |
| 741  | dosulepin             | 12 µM  | MCF7 | 0 | -0.098 | -0.187 | 5986 |
| 642  | nitrofurantoin        | 17 µM  | MCF7 | 0 | -0.098 | -0.196 | 2303 |
| 691  | cefsulodin            | 7 µM   | MCF7 | 0 | -0.098 | -0.128 | 4148 |

|      |                   |        |        |   |        |        |      |
|------|-------------------|--------|--------|---|--------|--------|------|
| 651  | alimemazine       | 5 µM   | HL60   | 0 | -0.098 | -0.1   | 2736 |
| 767  | tretinoin         | 1 µM   | MCF7   | 0 | -0.098 | -0.235 | 6931 |
| 614  | mianserin         | 13 µM  | HL60   | 0 | -0.098 | -0.156 | 1385 |
| 653  | amoxicillin       | 11 µM  | MCF7   | 0 | -0.098 | -0.215 | 2620 |
| 623  | methapyrilene     | 13 µM  | HL60   | 0 | -0.098 | -0.107 | 1588 |
| 111  | paclitaxel        | 100 nM | MCF7   | 0 | -0.098 | -0.112 | 640  |
| 664  | zuclopenthixol    | 9 µM   | HL60   | 0 | -0.098 | -0.227 | 2936 |
| 657  | dosulepin         | 12 µM  | MCF7   | 0 | -0.098 | -0.128 | 2864 |
| 772  | piroxicam         | 12 µM  | MCF7   | 0 | -0.098 | -0.222 | 7445 |
| 632  | cinchocaine       | 12 µM  | MCF7   | 0 | -0.098 | -0.202 | 1469 |
| 626  | trifluoperazine   | 10 µM  | MCF7   | 0 | -0.098 | -0.194 | 1649 |
| 651  | pyrithyldione     | 24 µM  | HL60   | 0 | -0.098 | -0.113 | 2740 |
| 755  | tonzonium bromide | 7 µM   | MCF7   | 0 | -0.098 | -0.156 | 6457 |
| 1089 | pioglitazone      | 10 µM  | PC3    | 0 | -0.098 | -0.159 | 7528 |
| 767  | LY-294002         | 10 µM  | MCF7   | 0 | -0.098 | -0.189 | 6953 |
| 626  | thioridazine      | 10 µM  | MCF7   | 0 | -0.098 | -0.142 | 1655 |
| 671  | gabapentin        | 23 µM  | MCF7   | 0 | -0.098 | -0.171 | 3472 |
| 641  | papaverine        | 11 µM  | HL60   | 0 | -0.098 | -0.193 | 1755 |
| 635  | tetramisole       | 17 µM  | HL60   | 0 | -0.099 | -0.195 | 2489 |
| 757  | fulvestrant       | 1 µM   | MCF7   | 0 | -0.099 | -0.185 | 5565 |
| 504  | quinostatin       | 10 µM  | MCF7   | 0 | -0.099 | -0.155 | 865  |
| 659  | rolitetracycline  | 8 µM   | HL60   | 0 | -0.099 | -0.228 | 3031 |
| 703  | rifabutin         | 5 µM   | PC3    | 0 | -0.099 | -0.193 | 4527 |
| 772  | bromperidol       | 10 µM  | MCF7   | 0 | -0.099 | -0.214 | 7457 |
| 729  | paclitaxel        | 5 µM   | MCF7   | 0 | -0.099 | -0.167 | 5320 |
| 513  | tanespimycin      | 1 µM   | MCF7   | 0 | -0.099 | -0.172 | 1063 |
| 70   | novobiocin        | 100 µM | ssMCF7 | 0 | -0.099 | -0.081 | 499  |
| 514  | cytochalasin B    | 21 µM  | MCF7   | 0 | -0.099 | -0.145 | 1122 |
| 715  | desoxycortone     | 12 µM  | PC3    | 0 | -0.099 | -0.176 | 6758 |
| 758  | latamoxef         | 7 µM   | MCF7   | 0 | -0.099 | -0.134 | 5609 |
| 727  | alvespimycin      | 100 nM | PC3    | 0 | -0.099 | -0.138 | 4437 |
| 725  | trifluoperazine   | 10 µM  | MCF7   | 0 | -0.099 | -0.178 | 5221 |
| 731  | clotrimazole      | 12 µM  | PC3    | 0 | -0.099 | -0.092 | 5726 |
| 649  | levonorgestrel    | 13 µM  | HL60   | 0 | -0.099 | -0.265 | 2547 |
| 632  | pyrimethamine     | 16 µM  | MCF7   | 0 | -0.099 | -0.18  | 1474 |
| 622  | labetalol         | 11 µM  | HL60   | 0 | -0.099 | -0.201 | 1550 |
| 710  | suloctidil        | 12 µM  | PC3    | 0 | -0.099 | -0.121 | 6675 |

|      |                 |        |        |   |        |        |      |
|------|-----------------|--------|--------|---|--------|--------|------|
| 650  | tanespimycin    | 1 µM   | HL60   | 0 | -0.099 | -0.171 | 2678 |
| 700  | tropicamide     | 14 µM  | MCF7   | 0 | -0.099 | -0.163 | 4744 |
| 653  | bisoprolol      | 9 µM   | MCF7   | 0 | -0.099 | -0.185 | 2642 |
| 504  | oxaprozin       | 300 µM | MCF7   | 0 | -0.099 | -0.164 | 863  |
| 603  | valproic acid   | 1 mM   | PC3    | 0 | -0.099 | -0.241 | 1209 |
| 736  | pinacidil       | 16 µM  | MCF7   | 0 | -0.099 | -0.097 | 5456 |
| 616  | acenocoumarol   | 11 µM  | PC3    | 0 | -0.1   | -0.125 | 2077 |
| 670  | guaifenesin     | 20 µM  | MCF7   | 0 | -0.1   | -0.133 | 3431 |
| 82   | deferoxamine    | 100 µM | MCF7   | 0 | -0.1   | -0.175 | 573  |
| 765  | trifluoperazine | 10 µM  | MCF7   | 0 | -0.1   | -0.171 | 6984 |
| 1082 | irinotecan      | 100 µM | MCF7   | 0 | -0.1   | -0.271 | 7498 |
| 612  | niclosamide     | 12 µM  | HL60   | 0 | -0.1   | -0.198 | 1998 |
| 689  | thioridazine    | 10 µM  | PC3    | 0 | -0.1   | -0.184 | 4085 |
| 750  | sirolimus       | 100 nM | HL60   | 0 | -0.1   | -0.174 | 6180 |
| 699  | PNU-0251126     | 1 µM   | MCF7   | 0 | -0.1   | -0.134 | 4714 |
| 614  | astemizole      | 9 µM   | HL60   | 0 | -0.1   | -0.119 | 1365 |
| 698  | 0175029-0000    | 1 µM   | PC3    | 0 | -0.1   | -0.207 | 7392 |
| 767  | wortmannin      | 10 nM  | MCF7   | 0 | -0.1   | -0.122 | 6959 |
| 712  | ketoconazole    | 8 µM   | PC3    | 0 | -0.1   | -0.143 | 4624 |
| 71   | troglitazone    | 10 µM  | SKMEL5 | 0 | -0.1   | -0.073 | 504  |
| 751  | flunisolide     | 9 µM   | MCF7   | 0 | -0.1   | -0.16  | 6023 |
| 680  | tiapride        | 11 µM  | PC3    | 0 | -0.1   | -0.149 | 3663 |
| 1085 | CP-863187       | 10 µM  | PC3    | 0 | -0.1   | -0.264 | 7512 |
| 610  | ethambutol      | 14 µM  | PC3    | 0 | -0.1   | -0.125 | 1900 |
| 772  | chlorphenesin   | 16 µM  | MCF7   | 0 | -0.1   | -0.181 | 7472 |
| 629  | sulindac        | 11 µM  | HL60   | 0 | -0.1   | -0.163 | 1857 |
| 615  | flufenamic acid | 14 µM  | HL60   | 0 | -0.1   | -0.145 | 1420 |
| 632  | acebutolol      | 11 µM  | MCF7   | 0 | -0.1   | -0.124 | 1493 |
| 734  | cefmetazole     | 8 µM   | PC3    | 0 | -0.1   | -0.104 | 5868 |
| 704  | tiabendazole    | 20 µM  | PC3    | 0 | -0.1   | -0.118 | 4579 |
| 744  | napelline       | 11 µM  | MCF7   | 0 | -0.1   | -0.211 | 6824 |
| 700  | benzamil        | 11 µM  | MCF7   | 0 | -0.1   | -0.189 | 4760 |
| 714  | trichostatin A  | 100 nM | PC3    | 0 | -0.1   | -0.169 | 6709 |
| 101  | LM-1685         | 10 µM  | MCF7   | 0 | -0.1   | -0.156 | 612  |
| 627  | sulindac        | 11 µM  | MCF7   | 0 | -0.1   | -0.183 | 1693 |
| 659  | carbachol       | 22 µM  | HL60   | 0 | -0.1   | -0.206 | 3042 |
| 767  | LY-294002       | 10 µM  | MCF7   | 0 | -0.1   | -0.179 | 6945 |



|     |                             |        |        |   |        |        |      |
|-----|-----------------------------|--------|--------|---|--------|--------|------|
| 650 | nordihydroguaiaretic acid   | 1 µM   | HL60   | 0 | -0.1   | -0.195 | 2683 |
| 650 | sirolimus                   | 100 nM | HL60   | 0 | -0.1   | -0.121 | 2681 |
| 611 | bromocriptine               | 5 µM   | PC3    | 0 | -0.1   | -0.174 | 1925 |
| 756 | alfaxalone                  | 12 µM  | MCF7   | 0 | -0.101 | -0.212 | 6514 |
| 660 | tyloxapol                   | 4 µM   | HL60   | 0 | -0.101 | -0.248 | 3074 |
| 95  | resveratrol                 | 50 µM  | MCF7   | 0 | -0.101 | -0.163 | 595  |
| 680 | 0173570-0000                | 1 µM   | PC3    | 0 | -0.101 | -0.132 | 3693 |
| 602 | LY-294002                   | 10 µM  | HL60   | 0 | -0.101 | -0.133 | 1168 |
| 13  | 15-delta prostaglandin J2   | 10 µM  | MCF7   | 0 | -0.101 | -0.098 | 201  |
| 636 | astemizole                  | 9 µM   | MCF7   | 0 | -0.101 | -0.117 | 2211 |
| 627 | noretynodrel                | 13 µM  | MCF7   | 0 | -0.101 | -0.151 | 1696 |
| 765 | tanespimycin                | 1 µM   | MCF7   | 0 | -0.101 | -0.225 | 6985 |
| 612 | cimetidine                  | 16 µM  | HL60   | 0 | -0.101 | -0.127 | 1964 |
| 660 | bephenium hydroxynaphthoate | 9 µM   | HL60   | 0 | -0.101 | -0.211 | 3089 |
| 646 | vinpocetine                 | 11 µM  | MCF7   | 0 | -0.101 | -0.158 | 3174 |
| 628 | diprophylline               | 16 µM  | PC3    | 0 | -0.101 | -0.145 | 1811 |
| 610 | isoxsuprine                 | 12 µM  | PC3    | 0 | -0.101 | -0.158 | 1904 |
| 71  | sodium phenylbutyrate       | 200 µM | SKMEL5 | 0 | -0.101 | -0.065 | 502  |
| 707 | etynodiol                   | 10 µM  | MCF7   | 0 | -0.101 | -0.133 | 5024 |
| 67  | pirinixic acid              | 100 µM | MCF7   | 0 | -0.101 | -0.238 | 487  |
| 646 | etacrynic acid              | 13 µM  | MCF7   | 0 | -0.101 | -0.152 | 3181 |
| 756 | nomegestrol                 | 11 µM  | MCF7   | 0 | -0.101 | -0.204 | 6525 |
| 746 | dexamethasone               | 9 µM   | MCF7   | 0 | -0.101 | -0.178 | 6271 |
| 746 | sulfamethizole              | 15 µM  | MCF7   | 0 | -0.101 | -0.179 | 6272 |
| 713 | dipyridamole                | 8 µM   | PC3    | 0 | -0.101 | -0.166 | 4656 |
| 715 | chlortetracycline           | 8 µM   | PC3    | 0 | -0.101 | -0.096 | 6761 |
| 655 | progesterone                | 13 µM  | MCF7   | 0 | -0.101 | -0.156 | 3287 |
| 750 | trogliatzone                | 10 µM  | HL60   | 0 | -0.101 | -0.169 | 6191 |
| 68  | fluphenazine                | 10 µM  | MCF7   | 0 | -0.101 | -0.187 | 490  |
| 603 | sirolimus                   | 100 nM | PC3    | 0 | -0.102 | -0.187 | 1221 |
| 616 | ivermectin                  | 5 µM   | PC3    | 0 | -0.102 | -0.206 | 2051 |
| 771 | bufexamac                   | 18 µM  | MCF7   | 0 | -0.102 | -0.14  | 7413 |
| 693 | simvastatin                 | 10 µM  | PC3    | 0 | -0.102 | -0.176 | 4244 |
| 502 | 5253409                     | 17 µM  | MCF7   | 0 | -0.102 | -0.185 | 961  |
| 761 | flunarizine                 | 8 µM   | PC3    | 0 | -0.102 | -0.201 | 7252 |
| 731 | dienestrol                  | 15 µM  | PC3    | 0 | -0.102 | -0.099 | 5727 |
| 725 | valproic acid               | 500 µM | MCF7   | 0 | -0.102 | -0.113 | 5237 |

|      |                 |        |      |   |        |        |      |
|------|-----------------|--------|------|---|--------|--------|------|
| 627  | isoxicam        | 12 µM  | MCF7 | 0 | -0.102 | -0.159 | 1698 |
| 767  | valproic acid   | 50 µM  | MCF7 | 0 | -0.102 | -0.159 | 6941 |
| 670  | dicoumarol      | 12 µM  | MCF7 | 0 | -0.102 | -0.17  | 3423 |
| 767  | sirolimus       | 100 nM | MCF7 | 0 | -0.102 | -0.19  | 6940 |
| 2    | phenformin      | 10 µM  | MCF7 | 0 | -0.102 | -0.125 | 21   |
| 1069 | SB-203580       | 1 µM   | PC3  | 0 | -0.102 | -0.158 | 7066 |
| 53   | thioridazine    | 1 µM   | MCF7 | 0 | -0.102 | -0.089 | 422  |
| 642  | indapamide      | 11 µM  | MCF7 | 0 | -0.102 | -0.174 | 2322 |
| 695  | emetine         | 7 µM   | MCF7 | 0 | -0.102 | -0.143 | 4827 |
| 728  | sulfanilamide   | 23 µM  | PC3  | 0 | -0.103 | -0.128 | 4474 |
| 1085 | BCB000039       | 10 µM  | PC3  | 0 | -0.103 | -0.219 | 7510 |
| 602  | alpha-estradiol | 10 nM  | HL60 | 0 | -0.103 | -0.154 | 1151 |
| 13   | sulfasalazine   | 100 µM | MCF7 | 0 | -0.103 | -0.141 | 204  |
| 635  | trichostatin A  | 100 nM | HL60 | 0 | -0.103 | -0.24  | 2474 |
| 753  | methotrexate    | 9 µM   | PC3  | 0 | -0.103 | -0.207 | 6318 |
| 656  | thiostrepton    | 2 µM   | MCF7 | 0 | -0.103 | -0.221 | 2823 |
| 1054 | scriptaid       | 10 µM  | PC3  | 0 | -0.103 | -0.163 | 6896 |
| 1093 | CP-944629       | 10 µM  | PC3  | 0 | -0.103 | -0.22  | 7549 |
| 691  | cinchocaine     | 12 µM  | MCF7 | 0 | -0.103 | -0.114 | 4149 |
| 715  | propranolol     | 14 µM  | PC3  | 0 | -0.103 | -0.13  | 6759 |
| 513  | tanespimycin    | 1 µM   | MCF7 | 0 | -0.103 | -0.233 | 1044 |
| 613  | dipyridamole    | 8 µM   | HL60 | 0 | -0.103 | -0.146 | 2017 |
| 505  | ionomycin       | 2 µM   | MCF7 | 0 | -0.103 | -0.228 | 882  |
| 745  | phenazopyridine | 16 µM  | MCF7 | 0 | -0.104 | -0.23  | 6234 |
| 1083 | trichostatin A  | 1 µM   | PC3  | 0 | -0.104 | -0.233 | 7503 |
| 633  | naloxone        | 11 µM  | MCF7 | 0 | -0.104 | -0.137 | 1506 |
| 744  | clomipramine    | 11 µM  | MCF7 | 0 | -0.104 | -0.18  | 6825 |
| 7    | dexverapamil    | 10 µM  | MCF7 | 0 | -0.104 | -0.201 | 164  |
| 640  | thiamine        | 12 µM  | HL60 | 0 | -0.104 | -0.13  | 1744 |
| 626  | tanespimycin    | 1 µM   | MCF7 | 0 | -0.104 | -0.218 | 1643 |
| 651  | doxycycline     | 8 µM   | HL60 | 0 | -0.104 | -0.187 | 2737 |
| 704  | chloropyramine  | 12 µM  | PC3  | 0 | -0.104 | -0.148 | 4589 |
| 750  | vorinostat      | 10 µM  | HL60 | 0 | -0.104 | -0.218 | 6179 |
| 602  | tanespimycin    | 1 µM   | HL60 | 0 | -0.104 | -0.199 | 1159 |
| 750  | trifluoperazine | 10 µM  | HL60 | 0 | -0.104 | -0.213 | 6183 |
| 756  | azapropazone    | 13 µM  | MCF7 | 0 | -0.104 | -0.212 | 6522 |
| 670  | cefazolin       | 8 µM   | MCF7 | 0 | -0.104 | -0.148 | 3426 |

|      |                                         |        |        |   |        |        |      |
|------|-----------------------------------------|--------|--------|---|--------|--------|------|
| 743  | oxybutynin                              | 10 µM  | MCF7   | 0 | -0.104 | -0.151 | 6770 |
| 744  | dihydroergotamine                       | 3 µM   | MCF7   | 0 | -0.104 | -0.127 | 6840 |
| 755  | benserazide                             | 14 µM  | MCF7   | 0 | -0.104 | -0.123 | 6482 |
| 685  | fenbufen                                | 16 µM  | MCF7   | 0 | -0.105 | -0.189 | 3618 |
| 59   | arachidonic acid                        | 10 µM  | MCF7   | 0 | -0.105 | -0.14  | 443  |
| 700  | demeclocycline                          | 8 µM   | MCF7   | 0 | -0.105 | -0.196 | 4728 |
| 644  | co-dergocrine mesilate                  | 6 µM   | HL60   | 0 | -0.105 | -0.166 | 2136 |
| 603  | sirolimus                               | 100 nM | PC3    | 0 | -0.105 | -0.161 | 1207 |
| 711  | 0317956-0000                            | 10 µM  | MCF7   | 0 | -0.105 | -0.211 | 3966 |
| 725  | monorden                                | 100 nM | MCF7   | 0 | -0.105 | -0.216 | 5216 |
| 1017 | erastin                                 | 20 µM  | PC3    | 0 | -0.105 | -0.074 | 6369 |
| 702  | fludrocortisone                         | 9 µM   | PC3    | 0 | -0.105 | -0.125 | 4342 |
| 659  | propofol                                | 22 µM  | HL60   | 0 | -0.105 | -0.192 | 3048 |
| 699  | fludroxycortide                         | 9 µM   | MCF7   | 0 | -0.105 | -0.118 | 4702 |
| 710  | metixene                                | 12 µM  | PC3    | 0 | -0.105 | -0.141 | 6672 |
| 713  | menadione                               | 23 µM  | PC3    | 0 | -0.105 | -0.218 | 4662 |
| 737  | norethisterone                          | 13 µM  | MCF7   | 0 | -0.105 | -0.186 | 5474 |
| 635  | sisomicin                               | 3 µM   | HL60   | 0 | -0.105 | -0.193 | 2493 |
| 42   | LY-294002                               | 10 µM  | ssMCF7 | 0 | -0.105 | -0.164 | 401  |
| 1086 | 11-deoxy-16,16-dimethylprostaglandin E2 | 10 µM  | MCF7   | 0 | -0.105 | -0.195 | 7514 |
| 109  | novobiocin                              | 100 µM | SKMEL5 | 0 | -0.105 | -0.164 | 632  |
| 653  | zoxazolamine                            | 24 µM  | MCF7   | 0 | -0.105 | -0.11  | 2625 |
| 506  | wortmannin                              | 10 nM  | MCF7   | 0 | -0.105 | -0.187 | 1023 |
| 714  | promethazine                            | 12 µM  | PC3    | 0 | -0.106 | -0.16  | 6717 |
| 506  | geldanamycin                            | 1 µM   | MCF7   | 0 | -0.106 | -0.21  | 1008 |
| 641  | epivincamine                            | 11 µM  | HL60   | 0 | -0.106 | -0.226 | 1783 |
| 683  | chlorcyclizine                          | 12 µM  | PC3    | 0 | -0.106 | -0.18  | 3810 |
| 18   | celecoxib                               | 10 µM  | MCF7   | 0 | -0.106 | -0.12  | 252  |
| 728  | dihydroergotamine                       | 3 µM   | PC3    | 0 | -0.106 | -0.22  | 4502 |
| 772  | quinpirole                              | 16 µM  | MCF7   | 0 | -0.106 | -0.129 | 7481 |
| 613  | diltiazem                               | 9 µM   | HL60   | 0 | -0.106 | -0.154 | 2032 |
| 681  | finasteride                             | 11 µM  | PC3    | 0 | -0.106 | -0.101 | 3744 |
| 701  | PNU-0230031                             | 1 µM   | PC3    | 0 | -0.106 | -0.132 | 4291 |
| 762  | hydrastine hydrochloride                | 10 µM  | PC3    | 0 | -0.106 | -0.145 | 7309 |
| 617  | pargyline                               | 20 µM  | PC3    | 0 | -0.106 | -0.169 | 2102 |
| 1033 | 5155877                                 | 10 µM  | MCF7   | 0 | -0.106 | -0.194 | 6549 |
| 637  | mefexamide                              | 13 µM  | MCF7   | 0 | -0.106 | -0.164 | 2284 |

|      |                           |        |      |   |        |        |      |
|------|---------------------------|--------|------|---|--------|--------|------|
| 681  | tropicamide               | 14 µM  | PC3  | 0 | -0.106 | -0.124 | 3722 |
| 707  | famotidine                | 12 µM  | MCF7 | 0 | -0.106 | -0.14  | 5011 |
| 505  | rottlerin                 | 10 µM  | MCF7 | 0 | -0.106 | -0.147 | 914  |
| 737  | prenylamine               | 10 µM  | MCF7 | 0 | -0.106 | -0.108 | 5489 |
| 718  | pizotifen                 | 9 µM   | PC3  | 0 | -0.107 | -0.137 | 5072 |
| 1092 | semustine                 | 100 µM | MCF7 | 0 | -0.107 | -0.192 | 7540 |
| 772  | atracurium besilate       | 3 µM   | MCF7 | 0 | -0.107 | -0.15  | 7477 |
| 602  | 15-delta prostaglandin J2 | 10 µM  | HL60 | 0 | -0.107 | -0.158 | 1172 |
| 713  | trichostatin A            | 100 nM | PC3  | 0 | -0.107 | -0.188 | 4665 |
| 680  | trichostatin A            | 100 nM | PC3  | 0 | -0.107 | -0.187 | 3688 |
| 750  | LY-294002                 | 10 µM  | HL60 | 0 | -0.107 | -0.206 | 6186 |
| 1088 | daunorubicin              | 1 µM   | MCF7 | 0 | -0.107 | -0.219 | 7525 |
| 718  | chlorpromazine            | 11 µM  | PC3  | 0 | -0.107 | -0.164 | 5074 |
| 690  | niclosamide               | 12 µM  | MCF7 | 0 | -0.107 | -0.11  | 4136 |
| 641  | lobeline                  | 11 µM  | HL60 | 0 | -0.107 | -0.076 | 1770 |
| 622  | oxybutynin                | 10 µM  | HL60 | 0 | -0.107 | -0.122 | 1551 |
| 1084 | daunorubicin              | 1 µM   | MCF7 | 0 | -0.107 | -0.236 | 7507 |
| 732  | nicergoline               | 8 µM   | PC3  | 0 | -0.107 | -0.185 | 5775 |
| 703  | CP-690334-01              | 10 µM  | PC3  | 0 | -0.107 | -0.113 | 4558 |
| 629  | noretynodrel              | 13 µM  | HL60 | 0 | -0.108 | -0.184 | 1860 |
| 1043 | STOCK1N-35696             | 15 µM  | MCF7 | 0 | -0.108 | -0.141 | 6577 |
| 626  | monorden                  | 100 nM | MCF7 | 0 | -0.108 | -0.197 | 1644 |
| 650  | 15-delta prostaglandin J2 | 10 µM  | HL60 | 0 | -0.108 | -0.109 | 2691 |
| 504  | resveratrol               | 10 µM  | MCF7 | 0 | -0.108 | -0.247 | 841  |
| 755  | (-)-MK-801                | 12 µM  | MCF7 | 0 | -0.108 | -0.135 | 6458 |
| 68   | dopamine                  | 1 µM   | MCF7 | 0 | -0.108 | -0.127 | 491  |
| 618  | riluzole                  | 15 µM  | HL60 | 0 | -0.108 | -0.155 | 2334 |
| 1015 | sirolimus                 | 100 nM | PC3  | 0 | -0.108 | -0.112 | 5980 |
| 67   | deferoxamine              | 100 µM | MCF7 | 0 | -0.108 | -0.19  | 485  |
| 692  | quinisocaine              | 13 µM  | PC3  | 0 | -0.108 | -0.165 | 4207 |
| 762  | homochlorcyclizine        | 10 µM  | PC3  | 0 | -0.108 | -0.145 | 7295 |
| 753  | oxybenzone                | 18 µM  | PC3  | 0 | -0.108 | -0.093 | 6309 |
| 733  | piperacetazine            | 10 µM  | PC3  | 0 | -0.108 | -0.203 | 5834 |
| 748  | gabapentin                | 23 µM  | MCF7 | 0 | -0.109 | -0.179 | 7229 |
| 771  | pinacidil                 | 16 µM  | MCF7 | 0 | -0.109 | -0.127 | 7437 |
| 65   | rofecoxib                 | 10 µM  | PC3  | 0 | -0.109 | -0.119 | 463  |
| 1007 | trichostatin A            | 1 µM   | PC3  | 0 | -0.109 | -0.153 | 5940 |

|      |                                         |        |      |   |        |        |      |
|------|-----------------------------------------|--------|------|---|--------|--------|------|
| 657  | chloroquine                             | 8 µM   | MCF7 | 0 | -0.109 | -0.129 | 2869 |
| 651  | raloxifene                              | 8 µM   | HL60 | 0 | -0.109 | -0.094 | 2738 |
| 727  | LY-294002                               | 10 µM  | PC3  | 0 | -0.109 | -0.144 | 4463 |
| 727  | tanespimycin                            | 1 µM   | PC3  | 0 | -0.109 | -0.135 | 4450 |
| 647  | methotrexate                            | 9 µM   | MCF7 | 0 | -0.109 | -0.207 | 3214 |
| 603  | tanespimycin                            | 1 µM   | PC3  | 0 | -0.109 | -0.186 | 1218 |
| 756  | ribavirin                               | 16 µM  | MCF7 | 0 | -0.109 | -0.102 | 6521 |
| 623  | methylethergometrine                    | 9 µM   | HL60 | 0 | -0.11  | -0.121 | 1607 |
| 655  | ciclopirox                              | 15 µM  | MCF7 | 0 | -0.11  | -0.241 | 3317 |
| 636  | ivermectin                              | 5 µM   | MCF7 | 0 | -0.11  | -0.124 | 2213 |
| 1045 | AG-028671                               | 10 µM  | MCF7 | 0 | -0.11  | -0.159 | 6587 |
| 757  | tanespimycin                            | 1 µM   | MCF7 | 0 | -0.11  | -0.199 | 5578 |
| 734  | ivermectin                              | 5 µM   | PC3  | 0 | -0.11  | -0.165 | 5853 |
| 1035 | 5194442                                 | 20 µM  | MCF7 | 0 | -0.11  | -0.143 | 6558 |
| 623  | clofazimine                             | 8 µM   | HL60 | 0 | -0.11  | -0.209 | 1624 |
| 703  | flutamide                               | 14 µM  | PC3  | 0 | -0.11  | -0.162 | 4539 |
| 602  | valproic acid                           | 500 µM | HL60 | 0 | -0.11  | -0.199 | 1181 |
| 1019 | PF-00539758-00                          | 10 µM  | PC3  | 0 | -0.11  | -0.123 | 6379 |
| 1087 | 11-deoxy-16,16-dimethylprostaglandin E2 | 10 µM  | PC3  | 0 | -0.11  | -0.113 | 7519 |
| 506  | LY-294002                               | 10 µM  | MCF7 | 0 | -0.11  | -0.183 | 1007 |
| 1    | metformin                               | 10 µM  | MCF7 | 0 | -0.11  | -0.184 | 2    |
| 1008 | AG-013608                               | 10 µM  | MCF7 | 0 | -0.11  | -0.14  | 5944 |
| 750  | haloperidol                             | 10 µM  | HL60 | 0 | -0.111 | -0.242 | 6203 |
| 653  | oxantel                                 | 7 µM   | MCF7 | 0 | -0.111 | -0.126 | 2632 |
| 744  | clobetasol                              | 9 µM   | MCF7 | 0 | -0.111 | -0.202 | 6835 |
| 627  | betazole                                | 27 µM  | MCF7 | 0 | -0.111 | -0.183 | 1690 |
| 701  | betonicine                              | 25 µM  | PC3  | 0 | -0.111 | -0.092 | 4301 |
| 732  | hexestrol                               | 15 µM  | PC3  | 0 | -0.111 | -0.201 | 5776 |
| 651  | trichostatin A                          | 100 nM | HL60 | 0 | -0.111 | -0.199 | 2721 |
| 712  | perphenazine                            | 10 µM  | PC3  | 0 | -0.111 | -0.127 | 4637 |
| 661  | proxymetacaine                          | 12 µM  | HL60 | 0 | -0.111 | -0.234 | 3113 |
| 612  | oxetacaine                              | 9 µM   | HL60 | 0 | -0.111 | -0.169 | 1984 |
| 603  | alpha-estradiol                         | 10 nM  | PC3  | 0 | -0.111 | -0.14  | 1210 |
| 707  | trichostatin A                          | 100 nM | MCF7 | 0 | -0.111 | -0.232 | 5017 |
| 506  | fulvestrant                             | 1 µM   | MCF7 | 0 | -0.111 | -0.233 | 985  |
| 603  | wortmannin                              | 10 nM  | PC3  | 0 | -0.111 | -0.165 | 1243 |
| 745  | clotrimazole                            | 12 µM  | MCF7 | 0 | -0.112 | -0.205 | 6207 |

|      |                     |        |        |   |        |        |      |
|------|---------------------|--------|--------|---|--------|--------|------|
| 756  | esculetin           | 22 µM  | MCF7   | 0 | -0.112 | -0.162 | 6499 |
| 619  | diethylcarbamazine  | 10 µM  | HL60   | 0 | -0.112 | -0.216 | 2394 |
| 647  | metergoline         | 10 µM  | MCF7   | 0 | -0.112 | -0.109 | 3221 |
| 602  | valproic acid       | 200 µM | HL60   | 0 | -0.112 | -0.268 | 1155 |
| 613  | metolazone          | 11 µM  | HL60   | 0 | -0.112 | -0.172 | 2014 |
| 26b  | monorden            | 100 nM | MCF7   | 0 | -0.112 | -0.088 | 325  |
| 771  | norethisterone      | 13 µM  | MCF7   | 0 | -0.112 | -0.205 | 7414 |
| 693  | cyclobenzaprine     | 13 µM  | PC3    | 0 | -0.112 | -0.125 | 4252 |
| 603  | genistein           | 10 µM  | PC3    | 0 | -0.112 | -0.199 | 1235 |
| 756  | octopamine          | 21 µM  | MCF7   | 0 | -0.112 | -0.217 | 6491 |
| 771  | nortriptyline       | 13 µM  | MCF7   | 0 | -0.112 | -0.217 | 7422 |
| 658  | liothyronine        | 6 µM   | HL60   | 0 | -0.112 | -0.223 | 2984 |
| 630  | trichostatin A      | 100 nM | HL60   | 0 | -0.112 | -0.148 | 1284 |
| 650  | geldanamycin        | 1 µM   | HL60   | 0 | -0.112 | -0.102 | 2688 |
| 646  | methylprednisolone  | 11 µM  | MCF7   | 0 | -0.112 | -0.14  | 3183 |
| 726  | phenoxybenzamine    | 12 µM  | MCF7   | 0 | -0.112 | -0.269 | 5248 |
| 31   | novobiocin          | 100 µM | MCF7   | 0 | -0.113 | -0.081 | 342  |
| 1077 | lomustine           | 100 µM | PC3    | 0 | -0.113 | -0.148 | 7094 |
| 1009 | monorden            | 100 nM | PC3    | 0 | -0.113 | -0.087 | 5952 |
| 702  | acacetin            | 14 µM  | PC3    | 0 | -0.113 | -0.121 | 4324 |
| 688  | mycophenolic acid   | 12 µM  | PC3    | 0 | -0.113 | -0.105 | 4019 |
| 2    | phenyl biguanide    | 10 µM  | MCF7   | 0 | -0.113 | -0.099 | 22   |
| 603  | sirolimus           | 100 nM | PC3    | 0 | -0.113 | -0.117 | 1242 |
| 699  | 0173570-0000        | 10 µM  | MCF7   | 0 | -0.113 | -0.194 | 4712 |
| 111  | pentamidine         | 100 µM | MCF7   | 0 | -0.113 | -0.111 | 639  |
| 736  | procarbazine        | 16 µM  | MCF7   | 0 | -0.113 | -0.098 | 5452 |
| 715  | midecamycin         | 5 µM   | PC3    | 0 | -0.113 | -0.177 | 6745 |
| 676  | alcuronium chloride | 5 µM   | MCF7   | 0 | -0.113 | -0.164 | 7345 |
| 611  | dipyridamole        | 8 µM   | PC3    | 0 | -0.113 | -0.181 | 1934 |
| 513  | troglitazone        | 10 µM  | MCF7   | 0 | -0.113 | -0.179 | 1070 |
| 73   | tanespimycin        | 1 µM   | SKMEL5 | 0 | -0.114 | -0.16  | 505  |
| 665  | pivampicillin       | 9 µM   | HL60   | 0 | -0.114 | -0.273 | 2945 |
| 688  | pronetalol          | 15 µM  | PC3    | 0 | -0.114 | -0.111 | 3984 |
| 502  | geldanamycin        | 1 µM   | MCF7   | 0 | -0.114 | -0.144 | 972  |
| 745  | raloxifene          | 8 µM   | MCF7   | 0 | -0.114 | -0.183 | 6235 |
| 602  | sirolimus           | 100 nM | HL60   | 0 | -0.114 | -0.203 | 1162 |
| 108  | monastrol           | 100 µM | MCF7   | 0 | -0.114 | -0.149 | 627  |

|      |                           |        |      |   |        |        |      |
|------|---------------------------|--------|------|---|--------|--------|------|
| 25   | flufenamic acid           | 10 µM  | MCF7 | 0 | -0.114 | -0.132 | 316  |
| 689  | corticosterone            | 12 µM  | PC3  | 0 | -0.114 | -0.092 | 4064 |
| 513  | LY-294002                 | 10 µM  | MCF7 | 0 | -0.115 | -0.179 | 1074 |
| 765  | tanespimycin              | 1 µM   | MCF7 | 0 | -0.115 | -0.192 | 6986 |
| 653  | clomifene                 | 7 µM   | MCF7 | 0 | -0.115 | -0.179 | 2624 |
| 611  | loperamide                | 8 µM   | PC3  | 0 | -0.115 | -0.116 | 1949 |
| 736  | tolfenamic acid           | 15 µM  | MCF7 | 0 | -0.115 | -0.148 | 5454 |
| 746  | spironolactone            | 10 µM  | MCF7 | 0 | -0.115 | -0.222 | 6255 |
| 765  | LY-294002                 | 10 µM  | MCF7 | 0 | -0.115 | -0.163 | 6998 |
| 513  | monorden                  | 100 nM | MCF7 | 0 | -0.115 | -0.154 | 1057 |
| 635  | ethionamide               | 24 µM  | HL60 | 0 | -0.115 | -0.141 | 2495 |
| 661  | trichostatin A            | 100 nM | HL60 | 0 | -0.115 | -0.208 | 3114 |
| 734  | alimemazine               | 5 µM   | PC3  | 0 | -0.115 | -0.155 | 5881 |
| 727  | wortmannin                | 10 nM  | PC3  | 0 | -0.115 | -0.146 | 4467 |
| 603  | 15-delta prostaglandin J2 | 10 µM  | PC3  | 0 | -0.115 | -0.171 | 1231 |
| 634  | menadione                 | 23 µM  | HL60 | 0 | -0.115 | -0.157 | 2439 |
| 680  | 0173570-0000              | 10 µM  | PC3  | 0 | -0.115 | -0.252 | 3690 |
| 623  | ketanserin                | 7 µM   | HL60 | 0 | -0.115 | -0.137 | 1593 |
| 623  | metergoline               | 10 µM  | HL60 | 0 | -0.115 | -0.132 | 1606 |
| 677  | pyrvinium                 | 3 µM   | MCF7 | 0 | -0.115 | -0.183 | 3518 |
| 28   | diclofenac                | 10 µM  | MCF7 | 0 | -0.115 | -0.077 | 333  |
| 772  | difenidol                 | 12 µM  | MCF7 | 0 | -0.116 | -0.204 | 7447 |
| 727  | LY-294002                 | 10 µM  | PC3  | 0 | -0.116 | -0.115 | 4460 |
| 1076 | AR-A014418                | 10 µM  | MCF7 | 0 | -0.116 | -0.169 | 7092 |
| 705  | vitexin                   | 9 µM   | MCF7 | 0 | -0.116 | -0.194 | 4413 |
| 691  | carbenoxolone             | 7 µM   | MCF7 | 0 | -0.116 | -0.114 | 4173 |
| 502  | monorden                  | 100 nM | MCF7 | 0 | -0.116 | -0.229 | 953  |
| 1015 | trichostatin A            | 1 µM   | PC3  | 0 | -0.116 | -0.195 | 5981 |
| 767  | tanespimycin              | 1 µM   | MCF7 | 0 | -0.116 | -0.238 | 6937 |
| 116  | mercaptopurine            | 10 µM  | PC3  | 0 | -0.116 | -0.194 | 667  |
| 646  | benzylamine               | 12 µM  | MCF7 | 0 | -0.116 | -0.143 | 3169 |
| 514  | monensin                  | 11 µM  | MCF7 | 0 | -0.117 | -0.147 | 1105 |
| 727  | trichostatin A            | 100 nM | PC3  | 0 | -0.117 | -0.21  | 4436 |
| 726  | clioquinol                | 13 µM  | MCF7 | 0 | -0.117 | -0.173 | 5258 |
| 636  | dihydrostreptomycin       | 3 µM   | MCF7 | 0 | -0.117 | -0.108 | 2237 |
| 640  | trichostatin A            | 100 nM | HL60 | 0 | -0.117 | -0.161 | 1732 |
| 670  | monensin                  | 6 µM   | MCF7 | 0 | -0.117 | -0.144 | 3443 |

|     |                           |        |      |   |        |        |      |
|-----|---------------------------|--------|------|---|--------|--------|------|
| 636 | tamoxifen                 | 7 µM   | MCF7 | 0 | -0.118 | -0.147 | 2212 |
| 622 | spiperone                 | 10 µM  | HL60 | 0 | -0.118 | -0.172 | 1559 |
| 772 | fenofibrate               | 11 µM  | MCF7 | 0 | -0.118 | -0.167 | 7474 |
| 700 | cloperastine              | 11 µM  | MCF7 | 0 | -0.118 | -0.157 | 4732 |
| 650 | vorinostat                | 10 µM  | HL60 | 0 | -0.118 | -0.167 | 2680 |
| 616 | disulfiram                | 13 µM  | PC3  | 0 | -0.118 | -0.18  | 2053 |
| 690 | mycophenolic acid         | 12 µM  | MCF7 | 0 | -0.118 | -0.172 | 4137 |
| 653 | prochlorperazine          | 7 µM   | MCF7 | 0 | -0.118 | -0.124 | 2641 |
| 707 | ciclopirox                | 15 µM  | MCF7 | 0 | -0.119 | -0.178 | 5023 |
| 727 | trifluoperazine           | 10 µM  | PC3  | 0 | -0.119 | -0.214 | 4448 |
| 719 | depropine                 | 8 µM   | PC3  | 0 | -0.119 | -0.227 | 5118 |
| 681 | meclofenoxate             | 14 µM  | PC3  | 0 | -0.119 | -0.123 | 3707 |
| 771 | trifluoperazine           | 8 µM   | MCF7 | 0 | -0.119 | -0.17  | 7420 |
| 725 | thioridazine              | 10 µM  | MCF7 | 0 | -0.119 | -0.175 | 5227 |
| 702 | trichostatin A            | 100 nM | PC3  | 0 | -0.119 | -0.227 | 4344 |
| 513 | 15-delta prostaglandin J2 | 10 µM  | MCF7 | 0 | -0.119 | -0.193 | 1069 |
| 694 | nystatin                  | 4 µM   | MCF7 | 0 | -0.119 | -0.175 | 4807 |
| 640 | thiocolchicoside          | 7 µM   | HL60 | 0 | -0.119 | -0.116 | 1726 |
| 657 | parthenolide              | 16 µM  | MCF7 | 0 | -0.119 | -0.199 | 2885 |
| 610 | ticlopidine               | 13 µM  | PC3  | 0 | -0.12  | -0.152 | 1895 |
| 650 | tretinoin                 | 1 µM   | HL60 | 0 | -0.12  | -0.137 | 2671 |
| 754 | betazole                  | 27 µM  | PC3  | 0 | -0.12  | -0.151 | 6344 |
| 650 | thioridazine              | 10 µM  | HL60 | 0 | -0.12  | -0.146 | 2690 |
| 603 | LY-294002                 | 10 µM  | PC3  | 0 | -0.12  | -0.171 | 1227 |
| 641 | trichostatin A            | 100 nM | HL60 | 0 | -0.12  | -0.127 | 1785 |
| 98  | monastrol                 | 20 µM  | MCF7 | 0 | -0.12  | -0.105 | 605  |
| 698 | 0173570-0000              | 10 µM  | PC3  | 0 | -0.12  | -0.24  | 7389 |
| 626 | valproic acid             | 200 µM | MCF7 | 0 | -0.12  | -0.242 | 1639 |
| 513 | fluphenazine              | 10 µM  | MCF7 | 0 | -0.12  | -0.238 | 1075 |
| 685 | cloperastine              | 11 µM  | MCF7 | 0 | -0.12  | -0.136 | 3608 |
| 44  | valproic acid             | 1 mM   | HL60 | 0 | -0.12  | -0.122 | 409  |
| 60  | trichostatin A            | 100 nM | PC3  | 0 | -0.121 | -0.195 | 448  |
| 719 | nisoxetine                | 13 µM  | PC3  | 0 | -0.121 | -0.134 | 5091 |
| 762 | trichostatin A            | 100 nM | PC3  | 0 | -0.121 | -0.203 | 7285 |
| 729 | desipramine               | 13 µM  | MCF7 | 0 | -0.121 | -0.183 | 5292 |
| 603 | geldanamycin              | 1 µM   | PC3  | 0 | -0.121 | -0.208 | 1228 |
| 506 | tanespimycin              | 1 µM   | MCF7 | 0 | -0.121 | -0.204 | 1005 |



|      |                  |        |        |   |        |        |      |
|------|------------------|--------|--------|---|--------|--------|------|
| 725  | tanespimycin     | 1 µM   | MCF7   | 0 | -0.121 | -0.141 | 5222 |
| 619  | dyclonine        | 12 µM  | HL60   | 0 | -0.121 | -0.186 | 2392 |
| 650  | valproic acid    | 1 mM   | HL60   | 0 | -0.121 | -0.18  | 2669 |
| 1008 | rotenone         | 1 µM   | MCF7   | 0 | -0.121 | -0.122 | 5943 |
| 637  | hydrastinine     | 16 µM  | MCF7   | 0 | -0.121 | -0.157 | 2283 |
| 613  | baclofen         | 19 µM  | HL60   | 0 | -0.122 | -0.179 | 2036 |
| 42   | sirolimus        | 100 nM | ssMCF7 | 0 | -0.122 | -0.168 | 402  |
| 719  | scoulerine       | 12 µM  | PC3    | 0 | -0.122 | -0.111 | 5111 |
| 731  | trichostatin A   | 100 nM | PC3    | 0 | -0.122 | -0.222 | 5745 |
| 645  | diphenylpyraline | 13 µM  | HL60   | 0 | -0.122 | -0.142 | 2205 |
| 1021 | 5707885          | 50 µM  | PC3    | 0 | -0.122 | -0.17  | 6390 |
| 714  | flupentixol      | 8 µM   | PC3    | 0 | -0.122 | -0.228 | 6708 |
| 634  | puromycin        | 7 µM   | HL60   | 0 | -0.122 | -0.112 | 2448 |
| 653  | cefalexin        | 11 µM  | MCF7   | 0 | -0.122 | -0.184 | 2628 |
| 98   | butein           | 10 µM  | MCF7   | 0 | -0.122 | -0.154 | 607  |
| 1050 | trichostatin A   | 1 µM   | PC3    | 0 | -0.122 | -0.205 | 6874 |
| 767  | tanespimycin     | 1 µM   | MCF7   | 0 | -0.122 | -0.233 | 6926 |
| 662  | aconitine        | 6 µM   | MCF7   | 0 | -0.122 | -0.117 | 2776 |
| 737  | antimycin A      | 7 µM   | MCF7   | 0 | -0.123 | -0.16  | 5472 |
| 614  | trichostatin A   | 100 nM | HL60   | 0 | -0.123 | -0.112 | 1400 |
| 73   | staurosporine    | 10 nM  | SKMEL5 | 0 | -0.123 | -0.142 | 508  |
| 715  | pipemidic acid   | 13 µM  | PC3    | 0 | -0.123 | -0.084 | 6752 |
| 748  | leflunomide      | 15 µM  | MCF7   | 0 | -0.123 | -0.107 | 7238 |
| 700  | 0179445-0000     | 1 µM   | MCF7   | 0 | -0.123 | -0.117 | 4758 |
| 733  | tetrandrine      | 6 µM   | PC3    | 0 | -0.123 | -0.117 | 5821 |
| 626  | LY-294002        | 10 µM  | MCF7   | 0 | -0.123 | -0.213 | 1661 |
| 685  | sulfamerazine    | 15 µM  | MCF7   | 0 | -0.123 | -0.122 | 3616 |
| 617  | nifenazone       | 13 µM  | PC3    | 0 | -0.123 | -0.118 | 2122 |
| 687  | spiradoline      | 1 µM   | MCF7   | 0 | -0.123 | -0.128 | 3901 |
| 513  | valproic acid    | 1 mM   | MCF7   | 0 | -0.123 | -0.199 | 1047 |
| 761  | trichostatin A   | 100 nM | PC3    | 0 | -0.124 | -0.215 | 7245 |
| 687  | CP-690334-01     | 1 µM   | MCF7   | 0 | -0.124 | -0.175 | 3909 |
| 655  | nitrofuraf       | 20 µM  | MCF7   | 0 | -0.124 | -0.212 | 3320 |
| 699  | merbromin        | 5 µM   | MCF7   | 0 | -0.124 | -0.12  | 4722 |
| 693  | corynanthine     | 10 µM  | PC3    | 0 | -0.124 | -0.082 | 4227 |
| 765  | trogliatzone     | 10 µM  | MCF7   | 0 | -0.124 | -0.176 | 6991 |
| 506  | trifluoperazine  | 10 µM  | MCF7   | 0 | -0.124 | -0.206 | 1004 |

|      |                             |            |        |   |        |        |      |
|------|-----------------------------|------------|--------|---|--------|--------|------|
| 758  | meclozine                   | 9 $\mu$ M  | MCF7   | 0 | -0.124 | -0.162 | 5607 |
| 70   | valproic acid               | 1 mM       | ssMCF7 | 0 | -0.124 | -0.148 | 497  |
| 745  | thiethylperazine            | 6 $\mu$ M  | MCF7   | 0 | -0.124 | -0.184 | 6232 |
| 637  | fenspiride                  | 13 $\mu$ M | MCF7   | 0 | -0.124 | -0.183 | 2269 |
| 702  | methylbenzethonium chloride | 9 $\mu$ M  | PC3    | 0 | -0.124 | -0.15  | 4325 |
| 101  | geldanamycin                | 1 $\mu$ M  | MCF7   | 0 | -0.124 | -0.148 | 611  |
| 681  | trichostatin A              | 100 nM     | PC3    | 0 | -0.124 | -0.202 | 3746 |
| 749  | trichostatin A              | 100 nM     | HL60   | 0 | -0.124 | -0.119 | 6143 |
| 704  | trichostatin A              | 100 nM     | PC3    | 0 | -0.124 | -0.211 | 4565 |
| 650  | genistein                   | 10 $\mu$ M | HL60   | 0 | -0.124 | -0.093 | 2695 |
| 657  | trichostatin A              | 100 nM     | MCF7   | 0 | -0.125 | -0.27  | 2881 |
| 602  | wortmannin                  | 10 nM      | HL60   | 0 | -0.125 | -0.148 | 1184 |
| 636  | nicergoline                 | 8 $\mu$ M  | MCF7   | 0 | -0.125 | -0.225 | 2220 |
| 107  | nocodazole                  | 1 $\mu$ M  | MCF7   | 0 | -0.125 | -0.126 | 621  |
| 649  | mephentermine               | 9 $\mu$ M  | HL60   | 0 | -0.125 | -0.166 | 2563 |
| 502  | resveratrol                 | 10 $\mu$ M | MCF7   | 0 | -0.125 | -0.25  | 958  |
| 680  | riluzole                    | 15 $\mu$ M | PC3    | 0 | -0.125 | -0.181 | 3666 |
| 767  | fulvestrant                 | 10 nM      | MCF7   | 0 | -0.125 | -0.163 | 6955 |
| 1045 | 6-bromoindirubin-3'-oxime   | 500 nM     | MCF7   | 0 | -0.125 | -0.196 | 6589 |
| 111  | genistein                   | 10 $\mu$ M | MCF7   | 0 | -0.125 | -0.103 | 638  |
| 602  | tretinoin                   | 1 $\mu$ M  | HL60   | 0 | -0.125 | -0.174 | 1152 |
| 611  | azacyclonol                 | 15 $\mu$ M | PC3    | 0 | -0.125 | -0.149 | 1937 |
| 622  | pimozide                    | 9 $\mu$ M  | HL60   | 0 | -0.126 | -0.156 | 1562 |
| 720  | thiamazole                  | 35 $\mu$ M | MCF7   | 0 | -0.126 | -0.102 | 4372 |
| 644  | trichostatin A              | 100 nM     | HL60   | 0 | -0.126 | -0.167 | 2137 |
| 676  | molindone                   | 13 $\mu$ M | MCF7   | 0 | -0.126 | -0.132 | 7337 |
| 755  | fluspirilene                | 8 $\mu$ M  | MCF7   | 0 | -0.126 | -0.152 | 6463 |
| 647  | nicardipine                 | 8 $\mu$ M  | MCF7   | 0 | -0.126 | -0.173 | 3215 |
| 738  | parthenolide                | 16 $\mu$ M | MCF7   | 0 | -0.126 | -0.199 | 5530 |
| 613  | bromocriptine               | 5 $\mu$ M  | HL60   | 0 | -0.126 | -0.117 | 2007 |
| 1007 | LY-294002                   | 10 $\mu$ M | PC3    | 0 | -0.126 | -0.143 | 5942 |
| 619  | perhexiline                 | 10 $\mu$ M | HL60   | 0 | -0.127 | -0.156 | 2410 |
| 1059 | trichostatin A              | 1 $\mu$ M  | MCF7   | 0 | -0.127 | -0.176 | 6910 |
| 738  | trichostatin A              | 100 nM     | MCF7   | 0 | -0.127 | -0.188 | 5511 |
| 701  | gossypol                    | 8 $\mu$ M  | PC3    | 0 | -0.127 | -0.152 | 4296 |
| 745  | amodiaquine                 | 9 $\mu$ M  | MCF7   | 0 | -0.127 | -0.148 | 6224 |
| 709  | harpagoside                 | 8 $\mu$ M  | PC3    | 0 | -0.127 | -0.101 | 6636 |

|      |                  |             |      |   |        |        |      |
|------|------------------|-------------|------|---|--------|--------|------|
| 655  | butoconazole     | 8 $\mu$ M   | MCF7 | 0 | -0.127 | -0.206 | 3288 |
| 647  | ascorbic acid    | 22 $\mu$ M  | MCF7 | 0 | -0.128 | -0.124 | 3225 |
| 702  | phentolamine     | 13 $\mu$ M  | PC3  | 0 | -0.128 | -0.108 | 4336 |
| 505  | tanespimycin     | 1 $\mu$ M   | MCF7 | 0 | -0.128 | -0.136 | 916  |
| 626  | geldanamycin     | 1 $\mu$ M   | MCF7 | 0 | -0.129 | -0.19  | 1653 |
| 613  | trichostatin A   | 100 nM      | HL60 | 0 | -0.129 | -0.151 | 2035 |
| 671  | isoetarine       | 12 $\mu$ M  | MCF7 | 0 | -0.129 | -0.213 | 3451 |
| 629  | triamterene      | 16 $\mu$ M  | HL60 | 0 | -0.129 | -0.223 | 1861 |
| 765  | thioridazine     | 10 $\mu$ M  | MCF7 | 0 | -0.129 | -0.167 | 6989 |
| 658  | spectinomycin    | 10 $\mu$ M  | HL60 | 0 | -0.129 | -0.173 | 2987 |
| 702  | vincamine        | 11 $\mu$ M  | PC3  | 0 | -0.129 | -0.101 | 4341 |
| 688  | trichostatin A   | 100 nM      | PC3  | 0 | -0.129 | -0.176 | 3993 |
| 1065 | trichostatin A   | 1 $\mu$ M   | PC3  | 0 | -0.13  | -0.18  | 7047 |
| 626  | tanespimycin     | 1 $\mu$ M   | MCF7 | 0 | -0.13  | -0.188 | 1651 |
| 730  | trichostatin A   | 100 nM      | MCF7 | 0 | -0.13  | -0.207 | 5336 |
| 703  | chlorcyclizine   | 12 $\mu$ M  | PC3  | 0 | -0.13  | -0.179 | 4546 |
| 1082 | meteneprost      | 10 $\mu$ M  | MCF7 | 0 | -0.13  | -0.161 | 7500 |
| 1011 | tanespimycin     | 1 $\mu$ M   | PC3  | 0 | -0.13  | -0.149 | 5958 |
| 698  | levomepromazine  | 9 $\mu$ M   | PC3  | 0 | -0.13  | -0.158 | 7399 |
| 755  | phenoxybenzamine | 12 $\mu$ M  | MCF7 | 0 | -0.13  | -0.223 | 6451 |
| 734  | fluphenazine     | 8 $\mu$ M   | PC3  | 0 | -0.13  | -0.162 | 5880 |
| 1030 | trichostatin A   | 1 $\mu$ M   | MCF7 | 0 | -0.13  | -0.17  | 6434 |
| 505  | sirolimus        | 100 nM      | MCF7 | 0 | -0.13  | -0.131 | 921  |
| 1055 | scriptaid        | 10 $\mu$ M  | MCF7 | 0 | -0.131 | -0.167 | 6901 |
| 626  | fulvestrant      | 1 $\mu$ M   | MCF7 | 0 | -0.131 | -0.204 | 1630 |
| 766  | trichostatin A   | 100 nM      | MCF7 | 0 | -0.131 | -0.214 | 7005 |
| 55   | tanespimycin     | 1 $\mu$ M   | PC3  | 0 | -0.131 | -0.119 | 432  |
| 715  | cefotiam         | 7 $\mu$ M   | PC3  | 0 | -0.131 | -0.116 | 6762 |
| 1031 | trichostatin A   | 1 $\mu$ M   | PC3  | 0 | -0.131 | -0.152 | 6439 |
| 602  | geldanamycin     | 1 $\mu$ M   | HL60 | 0 | -0.131 | -0.197 | 1169 |
| 663  | sparteine        | 17 $\mu$ M  | MCF7 | 0 | -0.131 | -0.145 | 2790 |
| 757  | vorinostat       | 10 $\mu$ M  | MCF7 | 0 | -0.132 | -0.203 | 5580 |
| 733  | trichostatin A   | 100 nM      | PC3  | 0 | -0.132 | -0.196 | 5822 |
| 692  | reserpine        | 7 $\mu$ M   | PC3  | 0 | -0.132 | -0.136 | 4203 |
| 619  | nortriptyline    | 13 $\mu$ M  | HL60 | 0 | -0.132 | -0.12  | 2391 |
| 732  | trichostatin A   | 100 nM      | PC3  | 0 | -0.132 | -0.192 | 5802 |
| 101  | 5666823          | 100 $\mu$ M | MCF7 | 0 | -0.132 | -0.151 | 609  |

|     |                           |        |        |   |        |        |      |
|-----|---------------------------|--------|--------|---|--------|--------|------|
| 622 | clotrimazole              | 12 µM  | HL60   | 0 | -0.132 | -0.148 | 1549 |
| 107 | resveratrol               | 50 µM  | MCF7   | 0 | -0.132 | -0.188 | 622  |
| 622 | trichostatin A            | 100 nM | HL60   | 0 | -0.132 | -0.115 | 1561 |
| 650 | tanespimycin              | 1 µM   | HL60   | 0 | -0.132 | -0.121 | 2686 |
| 728 | oxyphenbutazone           | 12 µM  | PC3    | 0 | -0.132 | -0.098 | 4506 |
| 502 | prazosin                  | 10 µM  | MCF7   | 0 | -0.132 | -0.187 | 942  |
| 96  | ciclosporin               | 1 µM   | MCF7   | 0 | -0.133 | -0.195 | 602  |
| 767 | alvespimycin              | 100 nM | MCF7   | 0 | -0.133 | -0.162 | 6933 |
| 655 | epiandrosterone           | 14 µM  | MCF7   | 0 | -0.133 | -0.112 | 3306 |
| 663 | trichostatin A            | 100 nM | MCF7   | 0 | -0.133 | -0.211 | 2794 |
| 660 | etynodiol                 | 10 µM  | HL60   | 0 | -0.133 | -0.149 | 3102 |
| 641 | pseudopelletierine        | 21 µM  | HL60   | 0 | -0.133 | -0.158 | 1774 |
| 694 | mebhydrolin               | 5 µM   | MCF7   | 0 | -0.133 | -0.189 | 4795 |
| 65  | troglitazone              | 10 µM  | PC3    | 0 | -0.133 | -0.092 | 462  |
| 737 | chlorpromazine            | 11 µM  | MCF7   | 0 | -0.133 | -0.122 | 5493 |
| 727 | geldanamycin              | 1 µM   | PC3    | 0 | -0.133 | -0.139 | 4452 |
| 640 | resveratrol               | 18 µM  | HL60   | 0 | -0.134 | -0.153 | 1715 |
| 647 | zidovudine                | 15 µM  | MCF7   | 0 | -0.134 | -0.1   | 3211 |
| 647 | hycanthone                | 11 µM  | MCF7   | 0 | -0.134 | -0.26  | 3229 |
| 767 | tanespimycin              | 1 µM   | MCF7   | 0 | -0.134 | -0.217 | 6944 |
| 38  | tamoxifen                 | 1 µM   | ssMCF7 | 0 | -0.134 | -0.096 | 375  |
| 710 | clorgiline                | 13 µM  | PC3    | 0 | -0.134 | -0.201 | 6659 |
| 757 | tanespimycin              | 1 µM   | MCF7   | 0 | -0.134 | -0.211 | 5585 |
| 705 | thiostrepton              | 2 µM   | MCF7   | 0 | -0.134 | -0.236 | 4385 |
| 653 | buspirone                 | 9 µM   | MCF7   | 0 | -0.135 | -0.141 | 2637 |
| 734 | trichostatin A            | 100 nM | PC3    | 0 | -0.135 | -0.196 | 5882 |
| 602 | nordihydroguaiaretic acid | 1 µM   | HL60   | 0 | -0.135 | -0.207 | 1164 |
| 762 | triamterene               | 16 µM  | PC3    | 0 | -0.135 | -0.18  | 7307 |
| 6   | tamoxifen                 | 1 µM   | MCF7   | 0 | -0.135 | -0.104 | 143  |
| 109 | colchicine                | 1 µM   | SKMEL5 | 0 | -0.135 | -0.145 | 630  |
| 685 | tropicamide               | 14 µM  | MCF7   | 0 | -0.135 | -0.155 | 3619 |
| 682 | proglumide                | 12 µM  | PC3    | 0 | -0.135 | -0.093 | 3780 |
| 505 | calmidazolium             | 5 µM   | MCF7   | 0 | -0.136 | -0.148 | 906  |
| 640 | dihydroergocristine       | 6 µM   | HL60   | 0 | -0.136 | -0.142 | 1745 |
| 602 | valproic acid             | 1 mM   | HL60   | 0 | -0.136 | -0.213 | 1150 |
| 506 | trichostatin A            | 100 nM | MCF7   | 0 | -0.136 | -0.216 | 992  |
| 745 | syrosingopine             | 6 µM   | MCF7   | 0 | -0.136 | -0.189 | 6213 |

|      |                         |        |      |   |        |        |      |
|------|-------------------------|--------|------|---|--------|--------|------|
| 671  | raloxifene              | 8 µM   | MCF7 | 0 | -0.136 | -0.136 | 3480 |
| 612  | amprolium               | 13 µM  | HL60 | 0 | -0.136 | -0.163 | 1979 |
| 711  | flunisolide             | 9 µM   | MCF7 | 0 | -0.137 | -0.174 | 3923 |
| 1076 | lomustine               | 100 µM | MCF7 | 0 | -0.137 | -0.187 | 7089 |
| 35   | sirolimus               | 100 nM | HL60 | 0 | -0.137 | -0.131 | 362  |
| 1000 | trichostatin A          | 1 µM   | MCF7 | 0 | -0.137 | -0.133 | 5903 |
| 708  | trichostatin A          | 100 nM | MCF7 | 0 | -0.137 | -0.195 | 5693 |
| 622  | fluphenazine            | 8 µM   | HL60 | 0 | -0.137 | -0.158 | 1577 |
| 1013 | LY-294002               | 10 µM  | PC3  | 0 | -0.137 | -0.142 | 5970 |
| 633  | apomorphine             | 6 µM   | MCF7 | 0 | -0.138 | -0.164 | 1505 |
| 654  | amantadine              | 10 µM  | MCF7 | 0 | -0.138 | -0.139 | 3280 |
| 603  | trifluoperazine         | 10 µM  | PC3  | 0 | -0.138 | -0.236 | 1224 |
| 603  | tanespimycin            | 1 µM   | PC3  | 0 | -0.138 | -0.22  | 1225 |
| 637  | trichostatin A          | 100 nM | MCF7 | 0 | -0.138 | -0.225 | 2268 |
| 727  | vorinostat              | 10 µM  | PC3  | 0 | -0.138 | -0.17  | 4444 |
| 603  | tanespimycin            | 1 µM   | PC3  | 0 | -0.138 | -0.228 | 1206 |
| 56   | valproic acid           | 1 mM   | PC3  | 0 | -0.138 | -0.163 | 433  |
| 705  | chloropyramine          | 12 µM  | MCF7 | 0 | -0.138 | -0.151 | 4414 |
| 726  | meclozine               | 9 µM   | MCF7 | 0 | -0.138 | -0.13  | 5244 |
| 56   | novobiocin              | 100 µM | PC3  | 0 | -0.138 | -0.146 | 435  |
| 506  | valproic acid           | 500 µM | MCF7 | 0 | -0.139 | -0.15  | 1020 |
| 693  | trichostatin A          | 100 nM | PC3  | 0 | -0.139 | -0.176 | 4237 |
| 87   | HNMPA-(AM) <sub>3</sub> | 5 µM   | PC3  | 0 | -0.139 | -0.124 | 583  |
| 712  | trichostatin A          | 100 nM | PC3  | 0 | -0.139 | -0.194 | 4632 |
| 765  | monorden                | 100 nM | MCF7 | 0 | -0.14  | -0.214 | 6979 |
| 65   | LY-294002               | 10 µM  | PC3  | 0 | -0.14  | -0.138 | 461  |
| 623  | trichostatin A          | 100 nM | HL60 | 0 | -0.14  | -0.202 | 1612 |
| 1068 | 0198306-0000            | 10 µM  | MCF7 | 0 | -0.14  | -0.176 | 7064 |
| 736  | protriptyline           | 13 µM  | MCF7 | 0 | -0.14  | -0.199 | 5438 |
| 1029 | STOCK1N-35215           | 10 µM  | PC3  | 0 | -0.141 | -0.161 | 6427 |
| 765  | trichostatin A          | 1 µM   | MCF7 | 0 | -0.141 | -0.19  | 6993 |
| 618  | trichostatin A          | 100 nM | HL60 | 0 | -0.141 | -0.213 | 2370 |
| 705  | rescinnamine            | 6 µM   | MCF7 | 0 | -0.141 | -0.18  | 4386 |
| 502  | pyrvinium               | 1 µM   | MCF7 | 0 | -0.141 | -0.158 | 978  |
| 744  | trichostatin A          | 100 nM | MCF7 | 0 | -0.142 | -0.207 | 6820 |
| 677  | trichostatin A          | 100 nM | MCF7 | 0 | -0.142 | -0.19  | 3510 |
| 619  | fenoterol               | 10 µM  | HL60 | 0 | -0.142 | -0.141 | 2378 |

|      |                           |        |      |   |        |        |      |
|------|---------------------------|--------|------|---|--------|--------|------|
| 699  | dilazep                   | 6 µM   | MCF7 | 0 | -0.142 | -0.175 | 4688 |
| 602  | prochlorperazine          | 10 µM  | HL60 | 0 | -0.142 | -0.185 | 1156 |
| 1032 | trichostatin A            | 1 µM   | PC3  | 0 | -0.142 | -0.171 | 6546 |
| 513  | geldanamycin              | 1 µM   | MCF7 | 0 | -0.142 | -0.213 | 1066 |
| 16   | celecoxib                 | 10 µM  | MCF7 | 0 | -0.142 | -0.082 | 206  |
| 1002 | tanespimycin              | 1 µM   | MCF7 | 0 | -0.143 | -0.131 | 5914 |
| 628  | chlorpromazine            | 11 µM  | PC3  | 0 | -0.143 | -0.177 | 1822 |
| 735  | butoconazole              | 8 µM   | MCF7 | 0 | -0.143 | -0.151 | 5388 |
| 615  | piroxicam                 | 12 µM  | HL60 | 0 | -0.143 | -0.116 | 1405 |
| 117  | monastrol                 | 100 µM | MCF7 | 0 | -0.143 | -0.158 | 681  |
| 699  | trichostatin A            | 100 nM | MCF7 | 0 | -0.143 | -0.193 | 4710 |
| 757  | LY-294002                 | 10 µM  | MCF7 | 0 | -0.143 | -0.167 | 5587 |
| 650  | valproic acid             | 500 µM | HL60 | 0 | -0.143 | -0.134 | 2700 |
| 736  | imipramine                | 13 µM  | MCF7 | 0 | -0.143 | -0.167 | 5440 |
| 765  | 15-delta prostaglandin J2 | 10 µM  | MCF7 | 0 | -0.143 | -0.216 | 6990 |
| 707  | etoposide                 | 7 µM   | MCF7 | 0 | -0.143 | -0.22  | 5027 |
| 506  | valproic acid             | 1 mM   | MCF7 | 0 | -0.144 | -0.287 | 989  |
| 603  | vorinostat                | 10 µM  | PC3  | 0 | -0.144 | -0.176 | 1220 |
| 703  | withaferin A              | 1 µM   | PC3  | 0 | -0.144 | -0.155 | 4554 |
| 727  | trichostatin A            | 1 µM   | PC3  | 0 | -0.144 | -0.177 | 4458 |
| 66   | monorden                  | 100 nM | PC3  | 0 | -0.144 | -0.143 | 484  |
| 505  | celastrol                 | 3 µM   | MCF7 | 0 | -0.144 | -0.136 | 887  |
| 698  | 0173570-0000              | 1 µM   | PC3  | 0 | -0.144 | -0.228 | 7391 |
| 506  | tanespimycin              | 1 µM   | MCF7 | 0 | -0.144 | -0.207 | 1006 |
| 727  | sirolimus                 | 100 nM | PC3  | 0 | -0.145 | -0.102 | 4466 |
| 617  | chlorphenesin             | 16 µM  | PC3  | 0 | -0.145 | -0.176 | 2115 |
| 506  | thioridazine              | 10 µM  | MCF7 | 0 | -0.145 | -0.157 | 1010 |
| 737  | trichostatin A            | 100 nM | MCF7 | 0 | -0.145 | -0.203 | 5484 |
| 691  | thioridazine              | 10 µM  | MCF7 | 0 | -0.145 | -0.153 | 4164 |
| 765  | vorinostat                | 10 µM  | MCF7 | 0 | -0.145 | -0.202 | 6980 |
| 687  | fenbendazole              | 13 µM  | MCF7 | 0 | -0.145 | -0.107 | 3888 |
| 506  | monorden                  | 100 nM | MCF7 | 0 | -0.146 | -0.207 | 999  |
| 750  | tanespimycin              | 1 µM   | HL60 | 0 | -0.146 | -0.116 | 6184 |
| 745  | butacaine                 | 13 µM  | MCF7 | 0 | -0.146 | -0.181 | 6225 |
| 727  | thioridazine              | 10 µM  | PC3  | 0 | -0.146 | -0.143 | 4454 |
| 743  | pimozide                  | 9 µM   | MCF7 | 0 | -0.146 | -0.13  | 6780 |
| 685  | trichostatin A            | 100 nM | MCF7 | 0 | -0.146 | -0.187 | 3643 |

|      |                       |        |      |   |        |        |      |
|------|-----------------------|--------|------|---|--------|--------|------|
| 619  | isotretinoin          | 13 µM  | HL60 | 0 | -0.147 | -0.11  | 2407 |
| 1052 | trichostatin A        | 1 µM   | PC3  | 0 | -0.147 | -0.207 | 6886 |
| 757  | geldanamycin          | 1 µM   | MCF7 | 0 | -0.147 | -0.182 | 5588 |
| 709  | trichostatin A        | 100 nM | PC3  | 0 | -0.147 | -0.188 | 6609 |
| 101  | monastrol             | 100 µM | MCF7 | 0 | -0.148 | -0.161 | 610  |
| 698  | trichostatin A        | 100 nM | PC3  | 0 | -0.148 | -0.194 | 7387 |
| 626  | alvespimycin          | 100 nM | MCF7 | 0 | -0.148 | -0.176 | 1638 |
| 1064 | trichostatin A        | 1 µM   | MCF7 | 0 | -0.149 | -0.15  | 7043 |
| 649  | ethoxyquin            | 18 µM  | HL60 | 0 | -0.149 | -0.185 | 2559 |
| 653  | flupentixol           | 8 µM   | MCF7 | 0 | -0.149 | -0.138 | 2643 |
| 44   | valproic acid         | 10 mM  | HL60 | 0 | -0.149 | -0.117 | 410  |
| 56   | sodium phenylbutyrate | 1 mM   | PC3  | 0 | -0.149 | -0.182 | 434  |
| 719  | trichostatin A        | 100 nM | PC3  | 0 | -0.149 | -0.242 | 5086 |
| 602  | tanespimycin          | 1 µM   | HL60 | 0 | -0.149 | -0.135 | 1167 |
| 2    | valproic acid         | 1 mM   | MCF7 | 0 | -0.15  | -0.13  | 23   |
| 736  | pyrvinium             | 3 µM   | MCF7 | 0 | -0.15  | -0.184 | 5439 |
| 513  | thioridazine          | 10 µM  | MCF7 | 0 | -0.15  | -0.175 | 1068 |
| 735  | methotrexate          | 9 µM   | MCF7 | 0 | -0.15  | -0.189 | 5419 |
| 506  | LY-294002             | 10 µM  | MCF7 | 0 | -0.15  | -0.152 | 1019 |
| 619  | econazole             | 9 µM   | HL60 | 0 | -0.15  | -0.144 | 2396 |
| 5    | alpha-estradiol       | 10 nM  | MCF7 | 0 | -0.15  | -0.183 | 122  |
| 707  | suloctidil            | 12 µM  | MCF7 | 0 | -0.15  | -0.157 | 5021 |
| 758  | equilin               | 15 µM  | MCF7 | 0 | -0.151 | -0.107 | 5620 |
| 502  | trichostatin A        | 1 µM   | MCF7 | 0 | -0.151 | -0.197 | 981  |
| 756  | protriptyline         | 13 µM  | MCF7 | 0 | -0.151 | -0.176 | 6498 |
| 706  | trichostatin A        | 100 nM | MCF7 | 0 | -0.151 | -0.206 | 4954 |
| 650  | trichostatin A        | 1 µM   | HL60 | 0 | -0.151 | -0.231 | 2694 |
| 632  | trichostatin A        | 100 nM | MCF7 | 0 | -0.151 | -0.225 | 1471 |
| 695  | nifuroxazide          | 15 µM  | MCF7 | 0 | -0.151 | -0.122 | 4835 |
| 736  | trichostatin A        | 100 nM | MCF7 | 0 | -0.151 | -0.181 | 5441 |
| 1001 | trichostatin A        | 1 µM   | PC3  | 0 | -0.151 | -0.146 | 5908 |
| 752  | trichostatin A        | 100 nM | MCF7 | 0 | -0.151 | -0.209 | 6085 |
| 705  | ciclosporin           | 3 µM   | MCF7 | 0 | -0.151 | -0.16  | 4411 |
| 35   | sodium phenylbutyrate | 100 µM | HL60 | 0 | -0.152 | -0.128 | 363  |
| 1003 | tanespimycin          | 1 µM   | PC3  | 0 | -0.152 | -0.19  | 5919 |
| 747  | trichostatin A        | 100 nM | MCF7 | 0 | -0.152 | -0.148 | 7179 |
| 707  | fluspirilene          | 8 µM   | MCF7 | 0 | -0.153 | -0.161 | 5008 |

|      |                           |        |      |   |        |        |      |
|------|---------------------------|--------|------|---|--------|--------|------|
| 1014 | trichostatin A            | 1 µM   | MCF7 | 0 | -0.153 | -0.163 | 5976 |
| 1043 | trichostatin A            | 1 µM   | MCF7 | 0 | -0.153 | -0.207 | 6579 |
| 771  | homochlorcyclizine        | 10 µM  | MCF7 | 0 | -0.153 | -0.23  | 7417 |
| 622  | etacrynic acid            | 13 µM  | HL60 | 0 | -0.153 | -0.2   | 1565 |
| 35   | LY-294002                 | 10 µM  | HL60 | 0 | -0.153 | -0.105 | 361  |
| 771  | trichostatin A            | 100 nM | MCF7 | 0 | -0.153 | -0.219 | 7407 |
| 732  | spiperone                 | 10 µM  | PC3  | 0 | -0.153 | -0.125 | 5777 |
| 1006 | trichostatin A            | 1 µM   | MCF7 | 0 | -0.153 | -0.159 | 5935 |
| 736  | propafenone               | 11 µM  | MCF7 | 0 | -0.154 | -0.115 | 5437 |
| 1079 | trichostatin A            | 1 µM   | PC3  | 0 | -0.154 | -0.178 | 7105 |
| 626  | valproic acid             | 1 mM   | MCF7 | 0 | -0.155 | -0.22  | 1634 |
| 1066 | colforsin                 | 500 nM | MCF7 | 0 | -0.155 | -0.123 | 7055 |
| 653  | trichostatin A            | 100 nM | MCF7 | 0 | -0.155 | -0.214 | 2639 |
| 655  | trichostatin A            | 100 nM | MCF7 | 0 | -0.155 | -0.205 | 3312 |
| 603  | fluphenazine              | 10 µM  | PC3  | 0 | -0.155 | -0.209 | 1237 |
| 725  | vorinostat                | 10 µM  | MCF7 | 0 | -0.155 | -0.188 | 5217 |
| 626  | 15-delta prostaglandin J2 | 10 µM  | MCF7 | 0 | -0.155 | -0.227 | 1656 |
| 765  | trichostatin A            | 100 nM | MCF7 | 0 | -0.155 | -0.233 | 6972 |
| 758  | trichostatin A            | 100 nM | MCF7 | 0 | -0.156 | -0.205 | 5625 |
| 502  | 5224221                   | 12 µM  | MCF7 | 0 | -0.156 | -0.157 | 956  |
| 650  | trifluoperazine           | 10 µM  | HL60 | 0 | -0.157 | -0.12  | 2684 |
| 603  | trichostatin A            | 100 nM | PC3  | 0 | -0.157 | -0.171 | 1212 |
| 705  | trichostatin A            | 100 nM | MCF7 | 0 | -0.158 | -0.23  | 4388 |
| 725  | alvespimycin              | 100 nM | MCF7 | 0 | -0.158 | -0.192 | 5210 |
| 506  | prochlorperazine          | 10 µM  | MCF7 | 0 | -0.158 | -0.201 | 995  |
| 738  | prednicarbate             | 8 µM   | MCF7 | 0 | -0.158 | -0.184 | 5544 |
| 665  | trichostatin A            | 100 nM | HL60 | 0 | -0.158 | -0.267 | 2949 |
| 727  | 15-delta prostaglandin J2 | 10 µM  | PC3  | 0 | -0.159 | -0.13  | 4455 |
| 1033 | trichostatin A            | 1 µM   | MCF7 | 0 | -0.159 | -0.141 | 6551 |
| 750  | trichostatin A            | 1 µM   | HL60 | 0 | -0.159 | -0.106 | 6193 |
| 767  | vorinostat                | 10 µM  | MCF7 | 0 | -0.159 | -0.202 | 6939 |
| 654  | trichostatin A            | 100 nM | MCF7 | 0 | -0.159 | -0.175 | 3243 |
| 513  | trichostatin A            | 100 nM | MCF7 | 0 | -0.159 | -0.22  | 1050 |
| 619  | trichostatin A            | 100 nM | HL60 | 0 | -0.159 | -0.147 | 2375 |
| 686  | trichostatin A            | 100 nM | MCF7 | 0 | -0.159 | -0.15  | 3868 |
| 690  | trichostatin A            | 100 nM | MCF7 | 0 | -0.16  | -0.125 | 4112 |
| 1053 | trichostatin A            | 1 µM   | MCF7 | 0 | -0.16  | -0.196 | 6891 |



|      |                  |            |        |   |        |        |      |
|------|------------------|------------|--------|---|--------|--------|------|
| 1051 | trichostatin A   | 1 $\mu$ M  | MCF7   | 0 | -0.16  | -0.216 | 6879 |
| 602  | fluphenazine     | 10 $\mu$ M | HL60   | 0 | -0.16  | -0.134 | 1178 |
| 726  | trichostatin A   | 100 nM     | MCF7   | 0 | -0.16  | -0.164 | 5260 |
| 772  | pimethixene      | 10 $\mu$ M | MCF7   | 0 | -0.16  | -0.151 | 7468 |
| 660  | trichostatin A   | 100 nM     | HL60   | 0 | -0.161 | -0.193 | 3077 |
| 602  | sirolimus        | 100 nM     | HL60   | 0 | -0.161 | -0.221 | 1148 |
| 725  | tanespimycin     | 1 $\mu$ M  | MCF7   | 0 | -0.161 | -0.156 | 5223 |
| 689  | trichostatin A   | 100 nM     | PC3    | 0 | -0.161 | -0.217 | 4072 |
| 603  | trichostatin A   | 1 $\mu$ M  | PC3    | 0 | -0.161 | -0.146 | 1234 |
| 1095 | trichostatin A   | 1 $\mu$ M  | PC3    | 0 | -0.161 | -0.145 | 7555 |
| 695  | trichostatin A   | 100 nM     | MCF7   | 0 | -0.162 | -0.219 | 4821 |
| 513  | vorinostat       | 10 $\mu$ M | MCF7   | 0 | -0.162 | -0.201 | 1058 |
| 725  | geldanamycin     | 1 $\mu$ M  | MCF7   | 0 | -0.162 | -0.145 | 5225 |
| 1031 | 5707885          | 50 $\mu$ M | PC3    | 0 | -0.163 | -0.109 | 6438 |
| 602  | trichostatin A   | 100 nM     | HL60   | 0 | -0.163 | -0.191 | 1153 |
| 631  | naringenin       | 15 $\mu$ M | HL60   | 0 | -0.163 | -0.185 | 1342 |
| 715  | lynestrenol      | 14 $\mu$ M | PC3    | 0 | -0.163 | -0.124 | 6756 |
| 1068 | SC-19220         | 10 $\mu$ M | MCF7   | 0 | -0.164 | -0.114 | 7060 |
| 1094 | trichostatin A   | 1 $\mu$ M  | MCF7   | 0 | -0.164 | -0.118 | 7550 |
| 767  | fluphenazine     | 10 $\mu$ M | MCF7   | 0 | -0.165 | -0.186 | 6954 |
| 513  | trichostatin A   | 1 $\mu$ M  | MCF7   | 0 | -0.165 | -0.196 | 1072 |
| 744  | oxyphenbutazone  | 12 $\mu$ M | MCF7   | 0 | -0.165 | -0.175 | 6844 |
| 71   | LY-294002        | 10 $\mu$ M | SKMEL5 | 0 | -0.165 | -0.087 | 501  |
| 619  | pimethixene      | 10 $\mu$ M | HL60   | 0 | -0.166 | -0.211 | 2395 |
| 757  | LY-294002        | 10 $\mu$ M | MCF7   | 0 | -0.166 | -0.157 | 5599 |
| 506  | trichostatin A   | 1 $\mu$ M  | MCF7   | 0 | -0.167 | -0.201 | 1014 |
| 767  | trichostatin A   | 100 nM     | MCF7   | 0 | -0.167 | -0.213 | 6932 |
| 676  | trichostatin A   | 100 nM     | MCF7   | 0 | -0.167 | -0.193 | 7324 |
| 748  | alimemazine      | 5 $\mu$ M  | MCF7   | 0 | -0.167 | -0.114 | 7235 |
| 506  | vorinostat       | 10 $\mu$ M | MCF7   | 0 | -0.167 | -0.208 | 1000 |
| 616  | trichostatin A   | 100 nM     | PC3    | 0 | -0.167 | -0.179 | 2084 |
| 725  | trichostatin A   | 1 $\mu$ M  | MCF7   | 0 | -0.168 | -0.188 | 5231 |
| 729  | trichostatin A   | 100 nM     | MCF7   | 0 | -0.168 | -0.187 | 5308 |
| 727  | prochlorperazine | 10 $\mu$ M | PC3    | 0 | -0.168 | -0.147 | 4439 |
| 504  | trichostatin A   | 1 $\mu$ M  | MCF7   | 0 | -0.168 | -0.211 | 873  |
| 670  | trichostatin A   | 100 nM     | MCF7   | 0 | -0.168 | -0.164 | 3428 |
| 726  | amiodarone       | 6 $\mu$ M  | MCF7   | 0 | -0.168 | -0.212 | 5253 |

|      |                           |        |      |   |        |        |      |
|------|---------------------------|--------|------|---|--------|--------|------|
| 506  | LY-294002                 | 10 µM  | MCF7 | 0 | -0.168 | -0.184 | 1016 |
| 505  | 5109870                   | 25 µM  | MCF7 | 0 | -0.169 | -0.246 | 904  |
| 505  | HC toxin                  | 100 nM | MCF7 | 0 | -0.17  | -0.179 | 909  |
| 700  | trichostatin A            | 100 nM | MCF7 | 0 | -0.17  | -0.14  | 4768 |
| 1071 | trichostatin A            | 1 µM   | PC3  | 0 | -0.17  | -0.177 | 7073 |
| 645  | gossypol                  | 8 µM   | HL60 | 0 | -0.171 | -0.143 | 2202 |
| 750  | thioridazine              | 10 µM  | HL60 | 0 | -0.171 | -0.145 | 6189 |
| 1082 | trichostatin A            | 1 µM   | MCF7 | 0 | -0.171 | -0.223 | 7499 |
| 626  | tanespimycin              | 1 µM   | MCF7 | 0 | -0.172 | -0.145 | 1631 |
| 1009 | trichostatin A            | 1 µM   | PC3  | 0 | -0.172 | -0.186 | 5950 |
| 650  | valproic acid             | 200 µM | HL60 | 0 | -0.172 | -0.209 | 2674 |
| 711  | trichostatin A            | 100 nM | MCF7 | 0 | -0.172 | -0.198 | 3979 |
| 1073 | trichostatin A            | 1 µM   | PC3  | 0 | -0.172 | -0.199 | 7077 |
| 725  | trichostatin A            | 100 nM | MCF7 | 0 | -0.172 | -0.233 | 5209 |
| 725  | prochlorperazine          | 10 µM  | MCF7 | 0 | -0.173 | -0.113 | 5212 |
| 504  | ionomycin                 | 2 µM   | MCF7 | 0 | -0.173 | -0.148 | 871  |
| 28   | trichostatin A            | 100 nM | MCF7 | 0 | -0.174 | -0.14  | 331  |
| 741  | trichostatin A            | 100 nM | MCF7 | 0 | -0.175 | -0.202 | 5987 |
| 725  | tanespimycin              | 1 µM   | MCF7 | 0 | -0.175 | -0.139 | 5215 |
| 772  | trichostatin A            | 100 nM | MCF7 | 0 | -0.176 | -0.239 | 7453 |
| 650  | fluphenazine              | 10 µM  | HL60 | 0 | -0.176 | -0.104 | 2697 |
| 725  | 15-delta prostaglandin J2 | 10 µM  | MCF7 | 0 | -0.176 | -0.147 | 5228 |
| 626  | trichostatin A            | 1 µM   | MCF7 | 0 | -0.177 | -0.179 | 1659 |
| 715  | trichostatin A            | 100 nM | PC3  | 0 | -0.177 | -0.168 | 6736 |
| 622  | tretinoin                 | 13 µM  | HL60 | 0 | -0.178 | -0.127 | 1548 |
| 506  | tanespimycin              | 1 µM   | MCF7 | 0 | -0.178 | -0.181 | 998  |
| 682  | trichostatin A            | 100 nM | PC3  | 0 | -0.179 | -0.204 | 3787 |
| 767  | trichostatin A            | 1 µM   | MCF7 | 0 | -0.18  | -0.182 | 6951 |
| 647  | etoposide                 | 7 µM   | MCF7 | 0 | -0.181 | -0.229 | 3241 |
| 602  | vorinostat                | 10 µM  | HL60 | 0 | -0.181 | -0.213 | 1161 |
| 626  | trichostatin A            | 100 nM | MCF7 | 0 | -0.181 | -0.204 | 1637 |
| 1093 | semustine                 | 100 µM | PC3  | 0 | -0.182 | -0.233 | 7545 |
| 602  | trichostatin A            | 1 µM   | HL60 | 0 | -0.182 | -0.232 | 1175 |
| 514  | trichostatin A            | 100 nM | MCF7 | 0 | -0.182 | -0.182 | 1112 |
| 1008 | trichostatin A            | 1 µM   | MCF7 | 0 | -0.183 | -0.148 | 5945 |
| 744  | astemizole                | 9 µM   | MCF7 | 0 | -0.183 | -0.123 | 6807 |
| 615  | trichostatin A            | 100 nM | HL60 | 0 | -0.183 | -0.211 | 1421 |

|     |                           |             |        |   |        |        |      |
|-----|---------------------------|-------------|--------|---|--------|--------|------|
| 687 | withaferin A              | 1 $\mu$ M   | MCF7   | 0 | -0.183 | -0.194 | 3902 |
| 757 | trichostatin A            | 1 $\mu$ M   | MCF7   | 0 | -0.183 | -0.164 | 5594 |
| 646 | trichostatin A            | 100 nM      | MCF7   | 0 | -0.183 | -0.21  | 3177 |
| 767 | tanespimycin              | 1 $\mu$ M   | MCF7   | 0 | -0.184 | -0.127 | 6943 |
| 45  | trichostatin A            | 100 nM      | ssMCF7 | 0 | -0.184 | -0.2   | 413  |
| 726 | testosterone              | 12 $\mu$ M  | MCF7   | 0 | -0.185 | -0.103 | 5271 |
| 748 | trichostatin A            | 100 nM      | MCF7   | 0 | -0.186 | -0.177 | 7236 |
| 735 | trichostatin A            | 100 nM      | MCF7   | 0 | -0.187 | -0.192 | 5417 |
| 506 | sirolimus                 | 100 nM      | MCF7   | 0 | -0.187 | -0.142 | 1022 |
| 720 | withaferin A              | 1 $\mu$ M   | MCF7   | 0 | -0.187 | -0.172 | 4376 |
| 33  | valproic acid             | 10 mM       | MCF7   | 0 | -0.187 | -0.13  | 345  |
| 28  | trichostatin A            | 100 nM      | MCF7   | 0 | -0.188 | -0.098 | 332  |
| 647 | trichostatin A            | 100 nM      | MCF7   | 0 | -0.188 | -0.179 | 3227 |
| 683 | trichostatin A            | 100 nM      | PC3    | 0 | -0.188 | -0.209 | 3791 |
| 751 | trichostatin A            | 100 nM      | MCF7   | 0 | -0.191 | -0.159 | 6064 |
| 753 | trichostatin A            | 100 nM      | PC3    | 0 | -0.191 | -0.195 | 6316 |
| 757 | trichostatin A            | 100 nM      | MCF7   | 0 | -0.191 | -0.211 | 5572 |
| 631 | trichostatin A            | 100 nM      | HL60   | 0 | -0.193 | -0.193 | 1306 |
| 627 | trichostatin A            | 100 nM      | MCF7   | 0 | -0.193 | -0.168 | 1672 |
| 656 | trichostatin A            | 100 nM      | MCF7   | 0 | -0.195 | -0.191 | 2835 |
| 642 | trichostatin A            | 100 nM      | MCF7   | 0 | -0.195 | -0.118 | 2330 |
| 673 | trichostatin A            | 100 nM      | MCF7   | 0 | -0.195 | -0.166 | 3395 |
| 655 | amphotericin B            | 4 $\mu$ M   | MCF7   | 0 | -0.196 | -0.137 | 3303 |
| 756 | trichostatin A            | 100 nM      | MCF7   | 0 | -0.199 | -0.176 | 6493 |
| 746 | trichostatin A            | 100 nM      | MCF7   | 0 | -0.2   | -0.206 | 6276 |
| 687 | rifabutin                 | 5 $\mu$ M   | MCF7   | 0 | -0.2   | -0.154 | 3873 |
| 33  | valproic acid             | 500 $\mu$ M | MCF7   | 0 | -0.2   | -0.122 | 347  |
| 683 | withaferin A              | 1 $\mu$ M   | PC3    | 0 | -0.201 | -0.189 | 3819 |
| 767 | 15-delta prostaglandin J2 | 10 $\mu$ M  | MCF7   | 0 | -0.204 | -0.21  | 6948 |
| 662 | trichostatin A            | 100 nM      | MCF7   | 0 | -0.204 | -0.176 | 2777 |
| 743 | trichostatin A            | 100 nM      | MCF7   | 0 | -0.206 | -0.184 | 6784 |
| 506 | fluphenazine              | 10 $\mu$ M  | MCF7   | 0 | -0.206 | -0.192 | 1017 |
| 502 | ionomycin                 | 2 $\mu$ M   | MCF7   | 0 | -0.207 | -0.153 | 979  |
| 755 | trichostatin A            | 100 nM      | MCF7   | 0 | -0.208 | -0.179 | 6454 |
| 626 | vorinostat                | 10 $\mu$ M  | MCF7   | 0 | -0.208 | -0.191 | 1645 |
| 671 | trichostatin A            | 100 nM      | MCF7   | 0 | -0.209 | -0.219 | 3462 |
| 633 | trichostatin A            | 100 nM      | MCF7   | 0 | -0.213 | -0.226 | 1535 |

|      |                           |        |        |        |        |        |      |
|------|---------------------------|--------|--------|--------|--------|--------|------|
| 1066 | thapsigargin              | 100 nM | MCF7   | 0      | -0.221 | -0.119 | 7053 |
| 636  | trichostatin A            | 100 nM | MCF7   | 0      | -0.223 | -0.179 | 2247 |
| 657  | mometasone                | 8 µM   | MCF7   | 0      | -0.23  | -0.208 | 2896 |
| 750  | 15-delta prostaglandin J2 | 10 µM  | HL60   | 0      | -0.239 | -0.116 | 6190 |
| 506  | 15-delta prostaglandin J2 | 10 µM  | MCF7   | 0      | -0.246 | -0.171 | 1011 |
| 1068 | MG-262                    | 100 nM | MCF7   | 0      | -0.249 | -0.172 | 7063 |
| 33   | valproic acid             | 2 mM   | MCF7   | 0      | -0.264 | -0.108 | 346  |
| 689  | carteolol                 | 12 µM  | PC3    | -0.281 | -0.042 | 0.074  | 4096 |
| 24   | exisulind                 | 50 µM  | MCF7   | -0.31  | -0.062 | 0.066  | 314  |
| 689  | yohimbic acid             | 11 µM  | PC3    | -0.322 | -0.051 | 0.082  | 4082 |
| 702  | PHA-00851261E             | 1 µM   | PC3    | -0.337 | -0.053 | 0.087  | 4333 |
| 613  | danazol                   | 12 µM  | HL60   | -0.34  | -0.072 | 0.069  | 2038 |
| 683  | lithocholic acid          | 11 µM  | PC3    | -0.341 | -0.054 | 0.087  | 3816 |
| 710  | benzbromarone             | 9 µM   | PC3    | -0.342 | -0.05  | 0.091  | 6669 |
| 692  | amantadine                | 10 µM  | PC3    | -0.344 | -0.058 | 0.085  | 4222 |
| 681  | flunixin                  | 8 µM   | PC3    | -0.349 | -0.054 | 0.09   | 3713 |
| 19   | LY-294002                 | 10 µM  | MCF7   | -0.356 | -0.059 | 0.089  | 258  |
| 714  | ambroxol                  | 10 µM  | PC3    | -0.357 | -0.059 | 0.088  | 6719 |
| 610  | cimetidine                | 16 µM  | PC3    | -0.358 | -0.062 | 0.086  | 1884 |
| 692  | mestranol                 | 13 µM  | PC3    | -0.36  | -0.056 | 0.093  | 4208 |
| 610  | troleandomycin            | 5 µM   | PC3    | -0.36  | -0.053 | 0.096  | 1885 |
| 73   | SC-58125                  | 10 µM  | SKMEL5 | -0.362 | -0.08  | 0.07   | 507  |
| 709  | sulfabenzamide            | 14 µM  | PC3    | -0.363 | -0.047 | 0.103  | 6634 |
| 610  | idoxuridine               | 11 µM  | PC3    | -0.368 | -0.052 | 0.1    | 1899 |
| 681  | bromopride                | 12 µM  | PC3    | -0.369 | -0.063 | 0.089  | 3719 |
| 63   | tetraethylenepentamine    | 100 µM | PC3    | -0.372 | -0.058 | 0.095  | 457  |
| 731  | mevalolactone             | 31 µM  | PC3    | -0.373 | -0.066 | 0.088  | 5738 |
| 701  | etiocholanolone           | 14 µM  | PC3    | -0.374 | -0.075 | 0.08   | 4298 |
| 733  | meropenem                 | 10 µM  | PC3    | -0.376 | -0.057 | 0.099  | 5824 |
| 714  | primidone                 | 18 µM  | PC3    | -0.381 | -0.053 | 0.104  | 6723 |
| 681  | ketoprofen                | 16 µM  | PC3    | -0.382 | -0.07  | 0.088  | 3729 |
| 650  | LY-294002                 | 10 µM  | HL60   | -0.384 | -0.071 | 0.088  | 2687 |
| 713  | flurbiprofen              | 16 µM  | PC3    | -0.384 | -0.052 | 0.107  | 4674 |
| 688  | nafcillin                 | 9 µM   | PC3    | -0.387 | -0.067 | 0.093  | 3983 |
| 689  | furazolidone              | 18 µM  | PC3    | -0.388 | -0.085 | 0.076  | 4098 |
| 658  | lasalocid                 | 7 µM   | HL60   | -0.39  | -0.068 | 0.093  | 3021 |
| 680  | nitrofurantoin            | 17 µM  | PC3    | -0.39  | -0.073 | 0.088  | 3674 |

|      |                           |        |      |        |        |       |      |
|------|---------------------------|--------|------|--------|--------|-------|------|
| 651  | butacaine                 | 13 µM  | HL60 | -0.391 | -0.059 | 0.102 | 2728 |
| 727  | haloperidol               | 10 µM  | PC3  | -0.392 | -0.075 | 0.087 | 4468 |
| 645  | benzamil                  | 11 µM  | HL60 | -0.394 | -0.056 | 0.107 | 2200 |
| 13   | nordihydroguaiaretic acid | 1 µM   | MCF7 | -0.398 | -0.076 | 0.088 | 203  |
| 659  | bretylum tosilate         | 10 µM  | HL60 | -0.399 | -0.059 | 0.106 | 3057 |
| 41   | tretinoin                 | 1 µM   | HL60 | -0.399 | -0.07  | 0.095 | 390  |
| 704  | dicycloverine             | 12 µM  | PC3  | -0.401 | -0.052 | 0.113 | 4581 |
| 650  | troglitazone              | 10 µM  | HL60 | -0.401 | -0.05  | 0.116 | 2692 |
| 731  | alclometasone             | 8 µM   | PC3  | -0.401 | -0.067 | 0.099 | 5752 |
| 623  | zidovudine                | 15 µM  | HL60 | -0.402 | -0.048 | 0.118 | 1595 |
| 702  | 0317956-0000              | 1 µM   | PC3  | -0.402 | -0.08  | 0.086 | 4334 |
| 714  | paclitaxel                | 5 µM   | PC3  | -0.403 | -0.073 | 0.094 | 6720 |
| 1013 | fulvestrant               | 1 µM   | PC3  | -0.407 | -0.043 | 0.125 | 5969 |
| 55   | troglitazone              | 10 µM  | PC3  | -0.407 | -0.089 | 0.08  | 431  |
| 23   | sulindac                  | 50 µM  | MCF7 | -0.408 | -0.077 | 0.092 | 307  |
| 689  | carbenoxolone             | 7 µM   | PC3  | -0.409 | -0.065 | 0.104 | 4093 |
| 691  | 4-hydroxyphenazone        | 20 µM  | MCF7 | -0.41  | -0.08  | 0.09  | 4175 |
| 1044 | STOCK1N-35874             | 14 µM  | PC3  | -0.411 | -0.063 | 0.107 | 6583 |
| 647  | clopamide                 | 12 µM  | MCF7 | -0.412 | -0.049 | 0.122 | 3220 |
| 749  | thiethylperazine          | 6 µM   | HL60 | -0.412 | -0.065 | 0.105 | 6154 |
| 709  | methoxamine               | 16 µM  | PC3  | -0.413 | -0.075 | 0.095 | 6627 |
| 66   | imatinib                  | 10 µM  | PC3  | -0.414 | -0.075 | 0.096 | 483  |
| 647  | probucol                  | 8 µM   | MCF7 | -0.414 | -0.061 | 0.11  | 3223 |
| 731  | tetracycline              | 8 µM   | PC3  | -0.416 | -0.069 | 0.103 | 5757 |
| 58   | novobiocin                | 100 µM | MCF7 | -0.42  | -0.09  | 0.084 | 437  |
| 622  | mepacrine                 | 8 µM   | HL60 | -0.421 | -0.055 | 0.119 | 1563 |
| 617  | iproniazid                | 14 µM  | PC3  | -0.422 | -0.045 | 0.13  | 2125 |
| 672  | carbenoxolone             | 7 µM   | MCF7 | -0.422 | -0.057 | 0.117 | 3353 |
| 637  | meclofenamic acid         | 12 µM  | MCF7 | -0.423 | -0.073 | 0.102 | 2291 |
| 112  | colchicine                | 100 nM | MCF7 | -0.424 | -0.079 | 0.096 | 644  |
| 702  | sulfachlorpyridazine      | 14 µM  | PC3  | -0.424 | -0.073 | 0.102 | 4326 |
| 1095 | CP-863187                 | 10 µM  | PC3  | -0.424 | -0.072 | 0.103 | 7558 |
| 61   | tanespimycin              | 1 µM   | PC3  | -0.424 | -0.083 | 0.093 | 450  |
| 613  | ciprofloxacin             | 11 µM  | HL60 | -0.425 | -0.061 | 0.115 | 2022 |
| 616  | cefotaxime                | 8 µM   | PC3  | -0.426 | -0.046 | 0.13  | 2072 |
| 646  | alprenolol                | 14 µM  | MCF7 | -0.426 | -0.082 | 0.095 | 3188 |
| 703  | beta-escin                | 3 µM   | PC3  | -0.427 | -0.087 | 0.09  | 4544 |

|      |                                |        |      |        |        |       |      |
|------|--------------------------------|--------|------|--------|--------|-------|------|
| 713  | clozapine                      | 12 µM  | PC3  | -0.427 | -0.07  | 0.107 | 4670 |
| 623  | ambroxol                       | 10 µM  | HL60 | -0.428 | -0.081 | 0.096 | 1623 |
| 694  | benzocaine                     | 24 µM  | MCF7 | -0.428 | -0.066 | 0.112 | 4808 |
| 700  | flunixin                       | 8 µM   | MCF7 | -0.429 | -0.07  | 0.107 | 4735 |
| 75   | 1,5-isoquinolinediol           | 100 µM | HL60 | -0.429 | -0.082 | 0.095 | 543  |
| 703  | homosalate                     | 15 µM  | PC3  | -0.43  | -0.052 | 0.126 | 4533 |
| 611  | guanabenz                      | 14 µM  | PC3  | -0.431 | -0.067 | 0.111 | 1961 |
| 753  | vigabatrin                     | 31 µM  | PC3  | -0.432 | -0.06  | 0.119 | 6314 |
| 651  | bucladesine                    | 8 µM   | HL60 | -0.432 | -0.097 | 0.082 | 2741 |
| 647  | brinzolamide                   | 10 µM  | MCF7 | -0.433 | -0.074 | 0.105 | 3230 |
| 732  | ifosfamide                     | 15 µM  | PC3  | -0.433 | -0.063 | 0.116 | 5805 |
| 1038 | 16,16-dimethylprostaglandin E2 | 10 µM  | PC3  | -0.433 | -0.067 | 0.113 | 6562 |
| 714  | phenylpropanolamine            | 21 µM  | PC3  | -0.433 | -0.073 | 0.106 | 6699 |
| 727  | valproic acid                  | 200 µM | PC3  | -0.434 | -0.069 | 0.111 | 4438 |
| 733  | pseudopelletierine             | 21 µM  | PC3  | -0.435 | -0.069 | 0.111 | 5828 |
| 753  | chlorhexidine                  | 8 µM   | PC3  | -0.435 | -0.075 | 0.105 | 6302 |
| 728  | amrinone                       | 21 µM  | PC3  | -0.435 | -0.088 | 0.092 | 4488 |
| 622  | glibenclamide                  | 8 µM   | HL60 | -0.436 | -0.083 | 0.097 | 1546 |
| 715  | metergoline                    | 10 µM  | PC3  | -0.436 | -0.089 | 0.092 | 6744 |
| 728  | labetalol                      | 11 µM  | PC3  | -0.437 | -0.096 | 0.085 | 4473 |
| 755  | dexibuprofen                   | 19 µM  | MCF7 | -0.438 | -0.088 | 0.093 | 6471 |
| 43   | tetraethylenepentamine         | 100 µM | MCF7 | -0.438 | -0.084 | 0.097 | 406  |
| 36   | imatinib                       | 10 µM  | MCF7 | -0.439 | -0.09  | 0.091 | 366  |
| 690  | memantine                      | 19 µM  | MCF7 | -0.439 | -0.06  | 0.122 | 4135 |
| 712  | eticlopride                    | 11 µM  | PC3  | -0.439 | -0.086 | 0.096 | 4634 |
| 691  | metrizamide                    | 5 µM   | MCF7 | -0.439 | -0.079 | 0.102 | 4156 |
| 747  | proadifen                      | 10 µM  | MCF7 | -0.439 | -0.053 | 0.129 | 7165 |
| 756  | isradipine                     | 11 µM  | MCF7 | -0.439 | -0.066 | 0.116 | 6508 |
| 758  | pirenperone                    | 10 µM  | MCF7 | -0.443 | -0.091 | 0.092 | 5639 |
| 613  | lynestrenol                    | 14 µM  | HL60 | -0.443 | -0.071 | 0.112 | 2037 |
| 634  | ciclopirox                     | 15 µM  | HL60 | -0.443 | -0.074 | 0.11  | 2456 |
| 623  | ascorbic acid                  | 22 µM  | HL60 | -0.444 | -0.068 | 0.115 | 1610 |
| 772  | penbutolol                     | 6 µM   | MCF7 | -0.444 | -0.051 | 0.133 | 7476 |
| 641  | hydroquinine                   | 9 µM   | HL60 | -0.444 | -0.067 | 0.117 | 1775 |
| 713  | haloperidol                    | 11 µM  | PC3  | -0.446 | -0.074 | 0.111 | 4678 |
| 719  | adipiodone                     | 4 µM   | PC3  | -0.446 | -0.077 | 0.108 | 5085 |
| 728  | epivincamine                   | 11 µM  | PC3  | -0.446 | -0.075 | 0.11  | 4500 |

|      |                       |        |      |        |        |       |      |
|------|-----------------------|--------|------|--------|--------|-------|------|
| 693  | seneciphylline        | 12 µM  | PC3  | -0.447 | -0.071 | 0.114 | 4238 |
| 613  | azacyclonol           | 15 µM  | HL60 | -0.447 | -0.1   | 0.085 | 2020 |
| 678  | propoxycaïne          | 12 µM  | MCF7 | -0.447 | -0.064 | 0.121 | 3583 |
| 611  | dehydrocholic acid    | 10 µM  | PC3  | -0.447 | -0.085 | 0.1   | 1940 |
| 757  | haloperidol           | 10 µM  | MCF7 | -0.447 | -0.071 | 0.115 | 5604 |
| 741  | econazole             | 9 µM   | MCF7 | -0.448 | -0.073 | 0.112 | 6008 |
| 756  | isometheptene         | 8 µM   | MCF7 | -0.448 | -0.082 | 0.103 | 6524 |
| 657  | prenylamine           | 10 µM  | MCF7 | -0.449 | -0.065 | 0.121 | 2886 |
| 98   | thalidomide           | 100 µM | MCF7 | -0.449 | -0.121 | 0.065 | 606  |
| 691  | decamethonium bromide | 10 µM  | MCF7 | -0.45  | -0.063 | 0.123 | 4174 |
| 733  | terazosin             | 9 µM   | PC3  | -0.451 | -0.061 | 0.126 | 5831 |
| 732  | dexamethasone         | 9 µM   | PC3  | -0.451 | -0.076 | 0.11  | 5797 |
| 1086 | vinblastine           | 100 nM | MCF7 | -0.452 | -0.078 | 0.109 | 7517 |
| 748  | quipazine             | 9 µM   | MCF7 | -0.453 | -0.076 | 0.111 | 7240 |
| 641  | calycanthine          | 12 µM  | HL60 | -0.453 | -0.061 | 0.126 | 1771 |
| 611  | cyproheptadine        | 12 µM  | PC3  | -0.454 | -0.078 | 0.11  | 1938 |
| 660  | terguride             | 12 µM  | HL60 | -0.454 | -0.031 | 0.157 | 3082 |
| 737  | mafénide              | 18 µM  | MCF7 | -0.454 | -0.087 | 0.101 | 5499 |
| 614  | ampyrone              | 20 µM  | HL60 | -0.454 | -0.073 | 0.115 | 1402 |
| 758  | butyl hydroxybenzoate | 21 µM  | MCF7 | -0.454 | -0.065 | 0.123 | 5608 |
| 703  | ciclacillin           | 12 µM  | PC3  | -0.456 | -0.054 | 0.135 | 4536 |
| 709  | lovastatin            | 10 µM  | PC3  | -0.456 | -0.102 | 0.087 | 6633 |
| 726  | thioperamide          | 10 µM  | MCF7 | -0.456 | -0.062 | 0.126 | 5270 |
| 741  | ketorolac             | 11 µM  | MCF7 | -0.456 | -0.052 | 0.137 | 5988 |
| 634  | iohexol               | 5 µM   | HL60 | -0.456 | -0.075 | 0.114 | 2461 |
| 720  | CP-690334-01          | 1 µM   | MCF7 | -0.457 | -0.086 | 0.103 | 4383 |
| 736  | dimenhydrinate        | 9 µM   | MCF7 | -0.457 | -0.078 | 0.111 | 5450 |
| 744  | pipenzolate bromide   | 9 µM   | MCF7 | -0.458 | -0.07  | 0.12  | 6821 |
| 691  | tolmetin              | 13 µM  | MCF7 | -0.459 | -0.092 | 0.098 | 4167 |
| 714  | amikacin              | 7 µM   | PC3  | -0.459 | -0.096 | 0.094 | 6715 |
| 687  | tolbutamide           | 15 µM  | MCF7 | -0.459 | -0.061 | 0.129 | 3886 |
| 1069 | SC-19220              | 10 µM  | PC3  | -0.459 | -0.086 | 0.104 | 7065 |
| 736  | remoxipride           | 10 µM  | MCF7 | -0.459 | -0.071 | 0.119 | 5443 |
| 748  | oxprenolol            | 13 µM  | MCF7 | -0.46  | -0.072 | 0.119 | 7225 |
| 661  | pirindole             | 12 µM  | HL60 | -0.46  | -0.077 | 0.114 | 3140 |
| 633  | edrophonium chloride  | 20 µM  | MCF7 | -0.46  | -0.071 | 0.12  | 1519 |
| 615  | pyrantel              | 11 µM  | HL60 | -0.461 | -0.067 | 0.124 | 1413 |

|      |                        |        |      |        |        |       |      |
|------|------------------------|--------|------|--------|--------|-------|------|
| 758  | clenbuterol            | 13 µM  | MCF7 | -0.461 | -0.078 | 0.113 | 5631 |
| 640  | ajmaline               | 12 µM  | HL60 | -0.461 | -0.064 | 0.127 | 1749 |
| 8    | sulindac               | 100 µM | MCF7 | -0.461 | -0.106 | 0.085 | 168  |
| 713  | loperamide             | 8 µM   | PC3  | -0.462 | -0.091 | 0.1   | 4672 |
| 678  | chloropyrazine         | 35 µM  | MCF7 | -0.462 | -0.069 | 0.122 | 3570 |
| 704  | tetramisole            | 17 µM  | PC3  | -0.463 | -0.053 | 0.139 | 4587 |
| 614  | naltrexone             | 10 µM  | HL60 | -0.463 | -0.057 | 0.134 | 1363 |
| 1019 | STOCK1N-35215          | 10 µM  | PC3  | -0.463 | -0.108 | 0.084 | 6380 |
| 648  | terazosin              | 9 µM   | HL60 | -0.464 | -0.065 | 0.127 | 2530 |
| 738  | bumetanide             | 11 µM  | MCF7 | -0.464 | -0.062 | 0.129 | 5542 |
| 661  | azapropazone           | 13 µM  | HL60 | -0.464 | -0.081 | 0.111 | 3143 |
| 8    | tacrolimus             | 1 µM   | MCF7 | -0.464 | -0.079 | 0.114 | 169  |
| 702  | dicoumarol             | 12 µM  | PC3  | -0.465 | -0.065 | 0.127 | 4323 |
| 726  | azathioprine           | 14 µM  | MCF7 | -0.465 | -0.085 | 0.108 | 5262 |
| 656  | phenacetin             | 22 µM  | MCF7 | -0.466 | -0.068 | 0.125 | 2832 |
| 622  | mepyramine             | 10 µM  | HL60 | -0.466 | -0.059 | 0.134 | 1568 |
| 736  | piribedil              | 12 µM  | MCF7 | -0.466 | -0.08  | 0.113 | 5434 |
| 735  | dextromethorphan       | 11 µM  | MCF7 | -0.467 | -0.09  | 0.103 | 5401 |
| 614  | atropine oxide         | 12 µM  | HL60 | -0.467 | -0.034 | 0.159 | 1370 |
| 623  | desipramine            | 13 µM  | HL60 | -0.468 | -0.073 | 0.121 | 1596 |
| 658  | Prestwick-857          | 12 µM  | HL60 | -0.469 | -0.08  | 0.114 | 3016 |
| 1009 | rotenone               | 1 µM   | PC3  | -0.469 | -0.108 | 0.086 | 5948 |
| 670  | alpha-ergocryptine     | 7 µM   | MCF7 | -0.469 | -0.056 | 0.139 | 3434 |
| 737  | pirindole              | 12 µM  | MCF7 | -0.47  | -0.078 | 0.116 | 5497 |
| 715  | buspirone              | 9 µM   | PC3  | -0.47  | -0.062 | 0.133 | 6743 |
| 644  | Prestwick-642          | 14 µM  | HL60 | -0.47  | -0.078 | 0.117 | 2160 |
| 681  | foliosidine            | 13 µM  | PC3  | -0.47  | -0.052 | 0.143 | 3739 |
| 43   | tetraethylenepentamine | 10 µM  | MCF7 | -0.472 | -0.099 | 0.096 | 405  |
| 677  | proguanil              | 14 µM  | MCF7 | -0.472 | -0.075 | 0.12  | 3505 |
| 623  | amikacin               | 7 µM   | HL60 | -0.472 | -0.048 | 0.147 | 1618 |
| 633  | cotinine               | 23 µM  | MCF7 | -0.472 | -0.076 | 0.12  | 1511 |
| 752  | alclometasone          | 8 µM   | MCF7 | -0.472 | -0.058 | 0.137 | 6094 |
| 713  | serotonin              | 19 µM  | PC3  | -0.472 | -0.056 | 0.14  | 4673 |
| 640  | harmol                 | 16 µM  | HL60 | -0.473 | -0.064 | 0.132 | 1750 |
| 614  | mefloquine             | 10 µM  | HL60 | -0.473 | -0.081 | 0.115 | 1364 |
| 617  | nimesulide             | 13 µM  | PC3  | -0.474 | -0.056 | 0.14  | 2112 |
| 502  | depudecin              | 1 µM   | MCF7 | -0.474 | -0.068 | 0.128 | 982  |



|      |                                   |       |      |        |        |       |      |
|------|-----------------------------------|-------|------|--------|--------|-------|------|
| 640  | dirithromycin                     | 5 µM  | HL60 | -0.474 | -0.101 | 0.095 | 1712 |
| 634  | ergocalciferol                    | 10 µM | HL60 | -0.474 | -0.049 | 0.147 | 2442 |
| 642  | phentolamine                      | 13 µM | MCF7 | -0.475 | -0.078 | 0.119 | 2323 |
| 693  | theophylline                      | 20 µM | PC3  | -0.475 | -0.072 | 0.124 | 4228 |
| 718  | torasemide                        | 11 µM | PC3  | -0.475 | -0.064 | 0.133 | 5057 |
| 700  | foliosidine                       | 13 µM | MCF7 | -0.475 | -0.068 | 0.129 | 4761 |
| 688  | canadine                          | 12 µM | PC3  | -0.476 | -0.085 | 0.112 | 4020 |
| 613  | lisuride                          | 12 µM | HL60 | -0.476 | -0.049 | 0.148 | 2046 |
| 741  | ozagrel                           | 15 µM | MCF7 | -0.476 | -0.081 | 0.116 | 5983 |
| 614  | clindamycin                       | 9 µM  | HL60 | -0.476 | -0.117 | 0.081 | 1373 |
| 700  | meclofenoxate                     | 14 µM | MCF7 | -0.477 | -0.088 | 0.109 | 4729 |
| 711  | fludrocortisone                   | 9 µM  | MCF7 | -0.477 | -0.078 | 0.12  | 3977 |
| 610  | hydrochlorothiazide               | 13 µM | PC3  | -0.477 | -0.069 | 0.128 | 1906 |
| 1041 | 5155877                           | 10 µM | MCF7 | -0.477 | -0.085 | 0.113 | 6574 |
| 636  | acenocoumarol                     | 11 µM | MCF7 | -0.477 | -0.084 | 0.114 | 2240 |
| 733  | streptomycin                      | 3 µM  | PC3  | -0.478 | -0.059 | 0.139 | 5837 |
| 631  | SR-95531                          | 11 µM | HL60 | -0.478 | -0.054 | 0.144 | 1316 |
| 613  | chlortetracycline                 | 8 µM  | HL60 | -0.478 | -0.09  | 0.108 | 2042 |
| 1092 | 16-phenyltetranorprostaglandin E2 | 10 µM | MCF7 | -0.478 | -0.058 | 0.14  | 7541 |
| 704  | pancuronium bromide               | 5 µM  | PC3  | -0.478 | -0.045 | 0.153 | 4570 |
| 695  | cyclobenzaprine                   | 13 µM | MCF7 | -0.479 | -0.087 | 0.112 | 4834 |
| 708  | eticlopride                       | 11 µM | MCF7 | -0.48  | -0.081 | 0.118 | 5695 |
| 766  | etamivan                          | 18 µM | MCF7 | -0.48  | -0.069 | 0.13  | 7021 |
| 505  | 5286656                           | 50 µM | MCF7 | -0.48  | -0.068 | 0.131 | 889  |
| 680  | sulfadimethoxine                  | 13 µM | PC3  | -0.481 | -0.087 | 0.112 | 3702 |
| 713  | clenbuterol                       | 13 µM | PC3  | -0.481 | -0.089 | 0.11  | 4671 |
| 658  | oxolamine                         | 9 µM  | HL60 | -0.481 | -0.066 | 0.134 | 3006 |
| 103  | monastrol                         | 20 µM | MCF7 | -0.481 | -0.095 | 0.104 | 614  |
| 695  | dydrogesterone                    | 13 µM | MCF7 | -0.482 | -0.073 | 0.126 | 4836 |
| 676  | nifurtimox                        | 14 µM | MCF7 | -0.482 | -0.074 | 0.125 | 7328 |
| 680  | guanadrel                         | 8 µM  | PC3  | -0.482 | -0.107 | 0.093 | 3698 |
| 1029 | F0447-0125                        | 10 µM | PC3  | -0.483 | -0.097 | 0.103 | 6429 |
| 683  | CP-320650-01                      | 1 µM  | PC3  | -0.484 | -0.085 | 0.116 | 3825 |
| 635  | vancomycin                        | 3 µM  | HL60 | -0.484 | -0.04  | 0.16  | 2498 |
| 752  | naproxen                          | 16 µM | MCF7 | -0.484 | -0.091 | 0.109 | 6096 |
| 686  | vincamine                         | 11 µM | MCF7 | -0.484 | -0.093 | 0.107 | 3865 |
| 752  | altizide                          | 10 µM | MCF7 | -0.484 | -0.101 | 0.099 | 6089 |

|      |                       |        |        |        |        |       |      |
|------|-----------------------|--------|--------|--------|--------|-------|------|
| 700  | finasteride           | 11 µM  | MCF7   | -0.484 | -0.079 | 0.121 | 4766 |
| 69   | monorden              | 100 nM | SKMEL5 | -0.484 | -0.065 | 0.135 | 493  |
| 761  | dihydroergocristine   | 6 µM   | PC3    | -0.485 | -0.087 | 0.113 | 7275 |
| 754  | alverine              | 8 µM   | PC3    | -0.485 | -0.094 | 0.107 | 6345 |
| 686  | flecainide            | 8 µM   | MCF7   | -0.485 | -0.076 | 0.124 | 3843 |
| 735  | dequalinium chloride  | 8 µM   | MCF7   | -0.485 | -0.084 | 0.116 | 5396 |
| 632  | hydrochlorothiazide   | 13 µM  | MCF7   | -0.485 | -0.086 | 0.115 | 1487 |
| 628  | sulfadiazine          | 16 µM  | PC3    | -0.486 | -0.072 | 0.129 | 1810 |
| 647  | amikacin              | 7 µM   | MCF7   | -0.486 | -0.063 | 0.138 | 3233 |
| 645  | foliosidine           | 13 µM  | HL60   | -0.486 | -0.074 | 0.127 | 2201 |
| 637  | oxymetazoline         | 13 µM  | MCF7   | -0.487 | -0.099 | 0.102 | 2278 |
| 642  | 6-benzylaminopurine   | 18 µM  | MCF7   | -0.487 | -0.085 | 0.117 | 2313 |
| 687  | orphenadrine          | 13 µM  | MCF7   | -0.487 | -0.071 | 0.13  | 3883 |
| 657  | tubocurarine chloride | 5 µM   | MCF7   | -0.488 | -0.069 | 0.133 | 2887 |
| 731  | ricinine              | 24 µM  | PC3    | -0.488 | -0.086 | 0.116 | 5725 |
| 699  | ofloxacin             | 11 µM  | MCF7   | -0.489 | -0.085 | 0.117 | 4696 |
| 615  | tolfenamic acid       | 15 µM  | HL60   | -0.489 | -0.098 | 0.104 | 1437 |
| 1005 | sirolimus             | 100 nM | PC3    | -0.489 | -0.105 | 0.097 | 5932 |
| 685  | hydralazine           | 20 µM  | MCF7   | -0.489 | -0.099 | 0.104 | 3621 |
| 752  | terazosin             | 9 µM   | MCF7   | -0.49  | -0.092 | 0.111 | 6092 |
| 656  | vancomycin            | 3 µM   | MCF7   | -0.49  | -0.052 | 0.151 | 2858 |
| 640  | budesonide            | 9 µM   | HL60   | -0.49  | -0.076 | 0.127 | 1716 |
| 1004 | PF-00875133-00        | 10 µM  | MCF7   | -0.49  | -0.103 | 0.1   | 5923 |
| 650  | trichostatin A        | 100 nM | HL60   | -0.491 | -0.117 | 0.086 | 2672 |
| 1069 | 0198306-0000          | 10 µM  | PC3    | -0.491 | -0.083 | 0.12  | 7069 |
| 646  | bambuterol            | 10 µM  | MCF7   | -0.491 | -0.078 | 0.125 | 3199 |
| 673  | ioversol              | 5 µM   | MCF7   | -0.492 | -0.093 | 0.111 | 3365 |
| 735  | oxybenzone            | 18 µM  | MCF7   | -0.492 | -0.087 | 0.117 | 5410 |
| 617  | mafenide              | 18 µM  | PC3    | -0.492 | -0.064 | 0.14  | 2124 |
| 660  | oxybenzone            | 18 µM  | HL60   | -0.492 | -0.043 | 0.161 | 3092 |
| 662  | diclofenac            | 13 µM  | MCF7   | -0.493 | -0.07  | 0.134 | 2756 |
| 681  | prilocaine            | 16 µM  | PC3    | -0.493 | -0.068 | 0.136 | 3727 |
| 651  | gabapentin            | 23 µM  | HL60   | -0.493 | -0.078 | 0.126 | 2731 |
| 651  | corbadrine            | 22 µM  | HL60   | -0.493 | -0.104 | 0.101 | 2710 |
| 658  | furazolidone          | 18 µM  | HL60   | -0.495 | -0.037 | 0.168 | 3019 |
| 616  | dexamethasone         | 9 µM   | PC3    | -0.495 | -0.038 | 0.166 | 2079 |
| 646  | terbutaline           | 7 µM   | MCF7   | -0.495 | -0.1   | 0.105 | 3202 |

|      |                  |        |      |        |        |       |      |
|------|------------------|--------|------|--------|--------|-------|------|
| 649  | cefazolin        | 8 µM   | HL60 | -0.495 | -0.083 | 0.122 | 2564 |
| 687  | PHA-00745360     | 1 µM   | MCF7 | -0.496 | -0.064 | 0.141 | 3910 |
| 678  | piretanide       | 11 µM  | MCF7 | -0.496 | -0.076 | 0.13  | 3567 |
| 5    | estradiol        | 10 nM  | MCF7 | -0.496 | -0.067 | 0.138 | 121  |
| 673  | esculin          | 12 µM  | MCF7 | -0.496 | -0.09  | 0.116 | 3390 |
| 659  | propranolol      | 14 µM  | HL60 | -0.497 | -0.087 | 0.119 | 3059 |
| 1    | metformin        | 1 mM   | MCF7 | -0.497 | -0.089 | 0.117 | 4    |
| 744  | labetalol        | 11 µM  | MCF7 | -0.498 | -0.096 | 0.11  | 6809 |
| 653  | benfluorex       | 10 µM  | MCF7 | -0.498 | -0.077 | 0.129 | 2621 |
| 633  | midecamycin      | 5 µM   | MCF7 | -0.498 | -0.075 | 0.132 | 1526 |
| 700  | etiocholanolone  | 14 µM  | MCF7 | -0.499 | -0.094 | 0.112 | 4764 |
| 728  | dacarbazine      | 22 µM  | PC3  | -0.499 | -0.074 | 0.133 | 4480 |
| 615  | hydrastinine     | 16 µM  | HL60 | -0.499 | -0.045 | 0.162 | 1436 |
| 634  | fluoxetine       | 12 µM  | HL60 | -0.5   | -0.042 | 0.165 | 2453 |
| 704  | Prestwick-642    | 14 µM  | PC3  | -0.5   | -0.084 | 0.123 | 4594 |
| 719  | cyclizine        | 13 µM  | PC3  | -0.5   | -0.067 | 0.14  | 5100 |
| 664  | gabexate         | 10 µM  | HL60 | -0.5   | -0.074 | 0.133 | 2937 |
| 602  | alvespimycin     | 100 nM | HL60 | -0.501 | -0.057 | 0.15  | 1154 |
| 31   | fasudil          | 10 µM  | MCF7 | -0.501 | -0.083 | 0.124 | 343  |
| 747  | isoetarine       | 12 µM  | MCF7 | -0.501 | -0.069 | 0.139 | 7170 |
| 1027 | erastin          | 20 µM  | PC3  | -0.501 | -0.105 | 0.102 | 6417 |
| 648  | abamectin        | 5 µM   | HL60 | -0.501 | -0.08  | 0.127 | 2519 |
| 752  | propidium iodide | 6 µM   | MCF7 | -0.501 | -0.065 | 0.142 | 6104 |
| 754  | raubasine        | 10 µM  | PC3  | -0.501 | -0.085 | 0.123 | 6360 |
| 623  | clopamide        | 12 µM  | HL60 | -0.502 | -0.098 | 0.11  | 1605 |
| 630  | bupirone         | 9 µM   | HL60 | -0.502 | -0.068 | 0.14  | 1282 |
| 634  | amphotericin B   | 4 µM   | HL60 | -0.503 | -0.052 | 0.157 | 2441 |
| 731  | terbutaline      | 7 µM   | PC3  | -0.503 | -0.096 | 0.112 | 5764 |
| 693  | letrozole        | 14 µM  | PC3  | -0.503 | -0.072 | 0.137 | 4240 |
| 611  | midecamycin      | 5 µM   | PC3  | -0.504 | -0.084 | 0.125 | 1943 |
| 655  | niridazole       | 19 µM  | MCF7 | -0.504 | -0.081 | 0.128 | 3301 |
| 704  | ethionamide      | 24 µM  | PC3  | -0.505 | -0.04  | 0.169 | 4593 |
| 655  | biperiden        | 11 µM  | MCF7 | -0.506 | -0.092 | 0.118 | 3321 |
| 618  | ethisterone      | 13 µM  | HL60 | -0.507 | -0.065 | 0.145 | 2366 |
| 772  | methocarbamol    | 17 µM  | MCF7 | -0.507 | -0.089 | 0.121 | 7467 |
| 671  | securinine       | 18 µM  | MCF7 | -0.507 | -0.079 | 0.131 | 3470 |
| 658  | scopolamine      | 12 µM  | HL60 | -0.508 | -0.08  | 0.131 | 3018 |

|      |                    |       |      |        |        |       |      |
|------|--------------------|-------|------|--------|--------|-------|------|
| 741  | tiletamine         | 15 µM | MCF7 | -0.508 | -0.099 | 0.112 | 6013 |
| 709  | harmaline          | 14 µM | PC3  | -0.508 | -0.08  | 0.13  | 6623 |
| 1075 | pioglitazone       | 10 µM | PC3  | -0.508 | -0.074 | 0.136 | 7088 |
| 613  | moroxydine         | 19 µM | HL60 | -0.509 | -0.055 | 0.156 | 2027 |
| 95   | geldanamycin       | 1 µM  | MCF7 | -0.509 | -0.067 | 0.144 | 593  |
| 1047 | PHA-00767505E      | 10 µM | MCF7 | -0.509 | -0.092 | 0.119 | 6596 |
| 688  | sulmazole          | 14 µM | PC3  | -0.51  | -0.068 | 0.143 | 4009 |
| 610  | amprolium          | 13 µM | PC3  | -0.51  | -0.055 | 0.156 | 1898 |
| 628  | imipramine         | 13 µM | PC3  | -0.51  | -0.068 | 0.143 | 1807 |
| 1075 | CAY-10397          | 10 µM | PC3  | -0.51  | -0.091 | 0.121 | 7087 |
| 671  | butacaine          | 13 µM | MCF7 | -0.511 | -0.061 | 0.15  | 3469 |
| 1004 | fulvestrant        | 1 µM  | MCF7 | -0.511 | -0.125 | 0.087 | 5926 |
| 653  | clebopride         | 8 µM  | MCF7 | -0.511 | -0.083 | 0.128 | 2646 |
| 623  | maprotiline        | 13 µM | HL60 | -0.511 | -0.105 | 0.106 | 1621 |
| 704  | piromidic acid     | 14 µM | PC3  | -0.511 | -0.083 | 0.129 | 4575 |
| 744  | altizide           | 10 µM | MCF7 | -0.511 | -0.098 | 0.114 | 6829 |
| 758  | haloperidol        | 11 µM | MCF7 | -0.512 | -0.102 | 0.11  | 5638 |
| 611  | lisuride           | 12 µM | PC3  | -0.512 | -0.072 | 0.14  | 1962 |
| 761  | alfadolone         | 10 µM | PC3  | -0.512 | -0.077 | 0.135 | 7262 |
| 653  | droperidol         | 11 µM | MCF7 | -0.512 | -0.079 | 0.133 | 2645 |
| 636  | dexamethasone      | 9 µM  | MCF7 | -0.513 | -0.106 | 0.106 | 2242 |
| 678  | kaempferol         | 14 µM | MCF7 | -0.513 | -0.079 | 0.133 | 3579 |
| 712  | dehydrocholic acid | 10 µM | PC3  | -0.513 | -0.093 | 0.12  | 4620 |
| 677  | Prestwick-1103     | 20 µM | MCF7 | -0.513 | -0.089 | 0.124 | 3540 |
| 623  | betamethasone      | 10 µM | HL60 | -0.514 | -0.04  | 0.173 | 1590 |
| 649  | flecainide         | 8 µM  | HL60 | -0.514 | -0.088 | 0.125 | 2557 |
| 686  | ethoxyquin         | 18 µM | MCF7 | -0.515 | -0.105 | 0.108 | 3846 |
| 623  | etoposide          | 7 µM  | HL60 | -0.515 | -0.078 | 0.135 | 1626 |
| 612  | tolazoline         | 20 µM | HL60 | -0.515 | -0.081 | 0.132 | 2000 |
| 642  | dantrolene         | 12 µM | MCF7 | -0.515 | -0.091 | 0.122 | 2329 |
| 686  | proglumide         | 12 µM | MCF7 | -0.516 | -0.079 | 0.135 | 3861 |
| 683  | alpha-ergocryptine | 7 µM  | PC3  | -0.516 | -0.081 | 0.132 | 3817 |
| 735  | coralyne           | 10 µM | MCF7 | -0.516 | -0.08  | 0.133 | 5418 |
| 612  | tolnaftate         | 13 µM | HL60 | -0.516 | -0.058 | 0.156 | 2001 |
| 689  | diflorasone        | 8 µM  | PC3  | -0.517 | -0.087 | 0.127 | 4077 |
| 685  | myosmine           | 27 µM | MCF7 | -0.517 | -0.089 | 0.125 | 3634 |
| 693  | Prestwick-967      | 26 µM | PC3  | -0.517 | -0.072 | 0.142 | 4250 |

|      |                           |       |      |        |        |       |      |
|------|---------------------------|-------|------|--------|--------|-------|------|
| 633  | joramycin                 | 5 µM  | MCF7 | -0.517 | -0.093 | 0.121 | 1534 |
| 729  | nitrofuraf                | 20 µM | MCF7 | -0.517 | -0.08  | 0.134 | 5321 |
| 19   | rofecoxib                 | 10 µM | MCF7 | -0.518 | -0.073 | 0.142 | 256  |
| 640  | lobelanidine              | 11 µM | HL60 | -0.519 | -0.051 | 0.164 | 1747 |
| 728  | clonidine                 | 15 µM | PC3  | -0.519 | -0.068 | 0.147 | 4478 |
| 617  | cloxacillin               | 9 µM  | PC3  | -0.52  | -0.099 | 0.117 | 2126 |
| 1044 | dinoprostone              | 10 µM | PC3  | -0.521 | -0.106 | 0.11  | 6586 |
| 694  | propantheline bromide     | 9 µM  | MCF7 | -0.521 | -0.087 | 0.129 | 4798 |
| 673  | propofol                  | 22 µM | MCF7 | -0.521 | -0.076 | 0.14  | 3386 |
| 753  | esculin                   | 12 µM | PC3  | -0.521 | -0.096 | 0.12  | 6310 |
| 1020 | 5707885                   | 50 µM | MCF7 | -0.521 | -0.138 | 0.078 | 6385 |
| 1038 | STOCK1N-35696             | 15 µM | PC3  | -0.521 | -0.043 | 0.173 | 6564 |
| 689  | co-dergocrine mesilate    | 6 µM  | PC3  | -0.521 | -0.103 | 0.113 | 4071 |
| 646  | praziquantel              | 13 µM | MCF7 | -0.522 | -0.079 | 0.137 | 3189 |
| 655  | felodipine                | 10 µM | MCF7 | -0.522 | -0.087 | 0.129 | 3295 |
| 513  | nordihydroguaiaretic acid | 1 µM  | MCF7 | -0.523 | -0.059 | 0.157 | 1061 |
| 615  | chlorzoxazone             | 24 µM | HL60 | -0.523 | -0.122 | 0.094 | 1416 |
| 735  | clebopride                | 8 µM  | MCF7 | -0.523 | -0.075 | 0.142 | 5412 |
| 623  | hycanthone                | 11 µM | HL60 | -0.523 | -0.062 | 0.154 | 1614 |
| 619  | cortisone                 | 11 µM | HL60 | -0.523 | -0.105 | 0.112 | 2385 |
| 659  | 2-aminobenzenesulfonamide | 23 µM | HL60 | -0.523 | -0.052 | 0.165 | 3063 |
| 688  | tolazamide                | 13 µM | PC3  | -0.524 | -0.069 | 0.148 | 4003 |
| 112  | W-13                      | 10 µM | MCF7 | -0.524 | -0.085 | 0.131 | 643  |
| 772  | aminoglutethimide         | 17 µM | MCF7 | -0.524 | -0.094 | 0.123 | 7463 |
| 715  | zidovudine                | 15 µM | PC3  | -0.524 | -0.067 | 0.15  | 6733 |
| 613  | guanabenz                 | 14 µM | HL60 | -0.525 | -0.044 | 0.173 | 2045 |
| 75   | SC-58125                  | 10 µM | HL60 | -0.525 | -0.084 | 0.133 | 542  |
| 672  | levobunolol               | 12 µM | MCF7 | -0.525 | -0.097 | 0.12  | 3354 |
| 649  | isocarboxazid             | 17 µM | HL60 | -0.525 | -0.096 | 0.121 | 2562 |
| 719  | bumetanide                | 11 µM | PC3  | -0.526 | -0.077 | 0.14  | 5117 |
| 631  | N-acetyl-L-aspartic acid  | 23 µM | HL60 | -0.526 | -0.07  | 0.148 | 1329 |
| 681  | nefopam                   | 14 µM | PC3  | -0.526 | -0.065 | 0.153 | 3730 |
| 656  | trimethadione             | 28 µM | MCF7 | -0.527 | -0.058 | 0.16  | 2846 |
| 662  | vinburnine                | 14 µM | MCF7 | -0.527 | -0.092 | 0.126 | 2781 |
| 1009 | AG-013608                 | 10 µM | PC3  | -0.527 | -0.103 | 0.115 | 5949 |
| 611  | hydroxyzine               | 9 µM  | PC3  | -0.527 | -0.081 | 0.137 | 1941 |
| 656  | colistin                  | 3 µM  | MCF7 | -0.527 | -0.064 | 0.154 | 2851 |

|      |                         |        |        |        |        |       |      |
|------|-------------------------|--------|--------|--------|--------|-------|------|
| 682  | dantrolene              | 12 µM  | PC3    | -0.527 | -0.056 | 0.163 | 3786 |
| 1041 | PNU-0293363             | 10 µM  | MCF7   | -0.527 | -0.055 | 0.163 | 6573 |
| 703  | lithocholic acid        | 11 µM  | PC3    | -0.527 | -0.092 | 0.127 | 4551 |
| 713  | 3-hydroxy-DL-kynurenine | 18 µM  | PC3    | -0.527 | -0.06  | 0.158 | 4681 |
| 750  | fulvestrant             | 10 nM  | HL60   | -0.528 | -0.065 | 0.154 | 6197 |
| 746  | dorzolamide             | 11 µM  | MCF7   | -0.528 | -0.094 | 0.125 | 6259 |
| 631  | carteolol               | 12 µM  | HL60   | -0.528 | -0.052 | 0.166 | 1340 |
| 648  | sulfamethizole          | 15 µM  | HL60   | -0.528 | -0.095 | 0.124 | 2536 |
| 614  | tetracycline            | 8 µM   | HL60   | -0.528 | -0.093 | 0.126 | 1397 |
| 709  | Prestwick-857           | 12 µM  | PC3    | -0.528 | -0.058 | 0.161 | 6635 |
| 659  | nizatidine              | 12 µM  | HL60   | -0.529 | -0.038 | 0.181 | 3047 |
| 1005 | PF-00875133-00          | 10 µM  | PC3    | -0.529 | -0.098 | 0.121 | 5928 |
| 744  | securinine              | 18 µM  | MCF7   | -0.529 | -0.094 | 0.125 | 6831 |
| 691  | levothyroxine sodium    | 5 µM   | MCF7   | -0.53  | -0.101 | 0.118 | 4150 |
| 765  | wortmannin              | 10 nM  | MCF7   | -0.53  | -0.066 | 0.153 | 7002 |
| 16   | rofecoxib               | 10 µM  | MCF7   | -0.53  | -0.124 | 0.095 | 205  |
| 505  | pararosaniline          | 10 µM  | MCF7   | -0.531 | -0.073 | 0.147 | 893  |
| 614  | ivermectin              | 5 µM   | HL60   | -0.531 | -0.071 | 0.148 | 1367 |
| 69   | iloprost                | 1 µM   | SKMEL5 | -0.531 | -0.113 | 0.106 | 496  |
| 689  | xylazine                | 18 µM  | PC3    | -0.532 | -0.091 | 0.129 | 4066 |
| 1061 | trichostatin A          | 1 µM   | MCF7   | -0.532 | -0.107 | 0.113 | 6916 |
| 703  | santonin                | 16 µM  | PC3    | -0.532 | -0.085 | 0.135 | 4531 |
| 505  | clotrimazole            | 50 µM  | MCF7   | -0.532 | -0.069 | 0.151 | 905  |
| 692  | mebhydrolin             | 5 µM   | PC3    | -0.532 | -0.116 | 0.104 | 4211 |
| 691  | carteolol               | 12 µM  | MCF7   | -0.533 | -0.122 | 0.098 | 4176 |
| 640  | scoulerine              | 12 µM  | HL60   | -0.533 | -0.076 | 0.145 | 1742 |
| 502  | 5279552                 | 22 µM  | MCF7   | -0.533 | -0.075 | 0.146 | 960  |
| 752  | pheneticillin           | 10 µM  | MCF7   | -0.533 | -0.098 | 0.123 | 6105 |
| 672  | furazolidone            | 18 µM  | MCF7   | -0.533 | -0.121 | 0.1   | 3358 |
| 654  | SR-95531                | 11 µM  | MCF7   | -0.534 | -0.09  | 0.131 | 3253 |
| 646  | antazoline              | 13 µM  | MCF7   | -0.534 | -0.104 | 0.117 | 3173 |
| 671  | clidinium bromide       | 9 µM   | MCF7   | -0.534 | -0.068 | 0.153 | 3476 |
| 715  | bisoprolol              | 9 µM   | PC3    | -0.534 | -0.127 | 0.095 | 6748 |
| 728  | metoprolol              | 6 µM   | PC3    | -0.534 | -0.042 | 0.18  | 4508 |
| 736  | tribenoside             | 8 µM   | MCF7   | -0.534 | -0.106 | 0.115 | 5429 |
| 631  | carisoprodol            | 15 µM  | HL60   | -0.535 | -0.059 | 0.162 | 1314 |
| 650  | alvespimycin            | 100 nM | HL60   | -0.535 | -0.121 | 0.101 | 2673 |

|      |                           |            |      |        |        |       |      |
|------|---------------------------|------------|------|--------|--------|-------|------|
| 662  | dipivefrine               | 10 $\mu$ M | MCF7 | -0.536 | -0.086 | 0.135 | 2744 |
| 637  | norfloxacin               | 13 $\mu$ M | MCF7 | -0.536 | -0.101 | 0.121 | 2253 |
| 688  | nadolol                   | 13 $\mu$ M | PC3  | -0.536 | -0.065 | 0.157 | 4021 |
| 685  | fenoprofen                | 7 $\mu$ M  | MCF7 | -0.537 | -0.113 | 0.11  | 3612 |
| 757  | nordihydroguaiaretic acid | 1 $\mu$ M  | MCF7 | -0.537 | -0.103 | 0.119 | 5583 |
| 26b  | sirolimus                 | 100 nM     | MCF7 | -0.537 | -0.126 | 0.097 | 326  |
| 645  | trichostatin A            | 100 nM     | HL60 | -0.537 | -0.105 | 0.118 | 2208 |
| 745  | pheneticillin             | 10 $\mu$ M | MCF7 | -0.537 | -0.101 | 0.122 | 6239 |
| 687  | Prestwick-1100            | 9 $\mu$ M  | MCF7 | -0.538 | -0.086 | 0.137 | 3880 |
| 637  | alverine                  | 8 $\mu$ M  | MCF7 | -0.538 | -0.075 | 0.148 | 2273 |
| 690  | sisomicin                 | 3 $\mu$ M  | MCF7 | -0.538 | -0.085 | 0.138 | 4132 |
| 727  | genistein                 | 10 $\mu$ M | PC3  | -0.539 | -0.11  | 0.112 | 4459 |
| 767  | sirolimus                 | 100 nM     | MCF7 | -0.539 | -0.086 | 0.137 | 6958 |
| 699  | Prestwick-665             | 12 $\mu$ M | MCF7 | -0.539 | -0.093 | 0.13  | 4704 |
| 633  | moroxydine                | 19 $\mu$ M | MCF7 | -0.539 | -0.053 | 0.171 | 1527 |
| 706  | harpagoside               | 8 $\mu$ M  | MCF7 | -0.539 | -0.071 | 0.153 | 4981 |
| 688  | amiloride                 | 13 $\mu$ M | PC3  | -0.539 | -0.112 | 0.112 | 3990 |
| 650  | haloperidol               | 10 $\mu$ M | HL60 | -0.54  | -0.064 | 0.16  | 2704 |
| 617  | meclofenamic acid         | 12 $\mu$ M | PC3  | -0.54  | -0.054 | 0.17  | 2128 |
| 613  | naloxone                  | 11 $\mu$ M | HL60 | -0.541 | -0.112 | 0.112 | 2006 |
| 698  | calcium folinate          | 8 $\mu$ M  | PC3  | -0.541 | -0.054 | 0.17  | 7401 |
| 683  | citalopram                | 1 $\mu$ M  | PC3  | -0.542 | -0.103 | 0.122 | 3820 |
| 659  | thioperamide              | 10 $\mu$ M | HL60 | -0.542 | -0.082 | 0.142 | 3055 |
| 771  | pimethixene               | 10 $\mu$ M | MCF7 | -0.542 | -0.085 | 0.139 | 7426 |
| 641  | dipivefrine               | 10 $\mu$ M | HL60 | -0.542 | -0.073 | 0.152 | 1752 |
| 630  | clomifene                 | 7 $\mu$ M  | HL60 | -0.542 | -0.063 | 0.162 | 1269 |
| 706  | Prestwick-984             | 9 $\mu$ M  | MCF7 | -0.543 | -0.076 | 0.149 | 4948 |
| 766  | viomycin                  | 5 $\mu$ M  | MCF7 | -0.543 | -0.061 | 0.164 | 7036 |
| 623  | cefoperazone              | 6 $\mu$ M  | HL60 | -0.543 | -0.098 | 0.127 | 1627 |
| 655  | velnacrine                | 12 $\mu$ M | MCF7 | -0.544 | -0.097 | 0.129 | 3292 |
| 645  | Prestwick-685             | 11 $\mu$ M | HL60 | -0.544 | -0.089 | 0.137 | 2188 |
| 670  | tinidazole                | 16 $\mu$ M | MCF7 | -0.544 | -0.069 | 0.156 | 3430 |
| 658  | (+/-)-catechin            | 14 $\mu$ M | HL60 | -0.544 | -0.064 | 0.162 | 3012 |
| 658  | chloropyramine            | 12 $\mu$ M | HL60 | -0.544 | -0.091 | 0.134 | 3011 |
| 764  | nocodazole                | 13 $\mu$ M | PC3  | -0.545 | -0.073 | 0.153 | 7145 |
| 1062 | fulvestrant               | 1 $\mu$ M  | PC3  | -0.545 | -0.062 | 0.164 | 6918 |
| 702  | 0317956-0000              | 10 $\mu$ M | PC3  | -0.545 | -0.109 | 0.116 | 4331 |

|      |                             |        |      |        |        |       |      |
|------|-----------------------------|--------|------|--------|--------|-------|------|
| 637  | mafenide                    | 18 µM  | MCF7 | -0.546 | -0.092 | 0.134 | 2287 |
| 702  | dantrolene                  | 12 µM  | PC3  | -0.546 | -0.112 | 0.114 | 4343 |
| 632  | dicycloverine               | 12 µM  | MCF7 | -0.546 | -0.059 | 0.167 | 1483 |
| 1067 | colforsin                   | 500 nM | PC3  | -0.546 | -0.072 | 0.154 | 7059 |
| 655  | naringin                    | 7 µM   | MCF7 | -0.546 | -0.082 | 0.145 | 3286 |
| 731  | physostigmine               | 6 µM   | PC3  | -0.547 | -0.071 | 0.156 | 5749 |
| 65   | pirinixic acid              | 100 µM | PC3  | -0.547 | -0.105 | 0.121 | 464  |
| 654  | cyclobenzaprine             | 13 µM  | MCF7 | -0.547 | -0.089 | 0.137 | 3268 |
| 747  | diazoxide                   | 17 µM  | MCF7 | -0.547 | -0.054 | 0.173 | 7168 |
| 658  | etidronic acid              | 16 µM  | HL60 | -0.547 | -0.082 | 0.145 | 2985 |
| 650  | tanespimycin                | 1 µM   | HL60 | -0.547 | -0.127 | 0.1   | 2685 |
| 613  | aciclovir                   | 18 µM  | HL60 | -0.547 | -0.05  | 0.176 | 2044 |
| 745  | physostigmine               | 6 µM   | MCF7 | -0.547 | -0.109 | 0.118 | 6226 |
| 687  | lithocholic acid            | 11 µM  | MCF7 | -0.548 | -0.081 | 0.145 | 3899 |
| 687  | Prestwick-1080              | 15 µM  | MCF7 | -0.548 | -0.054 | 0.173 | 3878 |
| 622  | mifepristone                | 9 µM   | HL60 | -0.548 | -0.064 | 0.163 | 1569 |
| 22a  | quercetin                   | 1 µM   | MCF7 | -0.548 | -0.067 | 0.16  | 283  |
| 747  | albendazole                 | 15 µM  | MCF7 | -0.548 | -0.09  | 0.137 | 7164 |
| 772  | thiamine                    | 12 µM  | MCF7 | -0.549 | -0.095 | 0.132 | 7479 |
| 736  | flavoxate                   | 9 µM   | MCF7 | -0.549 | -0.077 | 0.15  | 5427 |
| 681  | 6-benzylaminopurine         | 18 µM  | PC3  | -0.549 | -0.102 | 0.126 | 3726 |
| 1091 | BCB000039                   | 10 µM  | PC3  | -0.55  | -0.111 | 0.116 | 7536 |
| 661  | octopamine                  | 21 µM  | HL60 | -0.55  | -0.054 | 0.173 | 3112 |
| 611  | chlorhexidine               | 8 µM   | PC3  | -0.55  | -0.118 | 0.11  | 1942 |
| 635  | tiaprofenic acid            | 15 µM  | HL60 | -0.551 | -0.095 | 0.133 | 2492 |
| 637  | iproniazid                  | 14 µM  | MCF7 | -0.551 | -0.103 | 0.125 | 2288 |
| 648  | suxibuzone                  | 9 µM   | HL60 | -0.551 | -0.08  | 0.148 | 2503 |
| 746  | naltrexone                  | 10 µM  | MCF7 | -0.551 | -0.081 | 0.147 | 6241 |
| 749  | piperacetazine              | 10 µM  | HL60 | -0.552 | -0.09  | 0.138 | 6152 |
| 746  | bupropion                   | 14 µM  | MCF7 | -0.552 | -0.085 | 0.143 | 6256 |
| 1089 | suramin sodium              | 10 µM  | PC3  | -0.552 | -0.073 | 0.155 | 7529 |
| 1087 | BCB000038                   | 10 µM  | PC3  | -0.552 | -0.112 | 0.117 | 7520 |
| 686  | methylbenzethonium chloride | 9 µM   | MCF7 | -0.552 | -0.107 | 0.121 | 3850 |
| 631  | lumicolchicine              | 10 µM  | HL60 | -0.552 | -0.059 | 0.17  | 1317 |
| 694  | pyrimethamine               | 16 µM  | MCF7 | -0.553 | -0.084 | 0.145 | 4779 |
| 641  | noscapine                   | 10 µM  | HL60 | -0.553 | -0.071 | 0.158 | 1753 |
| 1064 | 6-bromoindirubin-3'-oxime   | 500 nM | MCF7 | -0.554 | -0.097 | 0.132 | 7044 |



|      |                             |        |      |        |        |       |      |
|------|-----------------------------|--------|------|--------|--------|-------|------|
| 683  | PHA-00745360                | 10 µM  | PC3  | -0.554 | -0.072 | 0.157 | 3824 |
| 611  | azathioprine                | 14 µM  | PC3  | -0.554 | -0.058 | 0.171 | 1945 |
| 735  | ampicillin                  | 10 µM  | MCF7 | -0.554 | -0.09  | 0.14  | 5408 |
| 728  | isocorydine                 | 12 µM  | PC3  | -0.554 | -0.099 | 0.131 | 4505 |
| 725  | acetylsalicylic acid        | 100 µM | MCF7 | -0.555 | -0.069 | 0.16  | 5201 |
| 53   | trifluoperazine             | 10 µM  | MCF7 | -0.556 | -0.121 | 0.109 | 421  |
| 632  | pheniramine                 | 11 µM  | MCF7 | -0.556 | -0.077 | 0.153 | 1492 |
| 745  | ciprofibrate                | 14 µM  | MCF7 | -0.556 | -0.086 | 0.144 | 6218 |
| 686  | fludrocortisone             | 9 µM   | MCF7 | -0.556 | -0.116 | 0.114 | 3866 |
| 726  | timolol                     | 9 µM   | MCF7 | -0.556 | -0.056 | 0.174 | 5280 |
| 756  | bacitracin                  | 3 µM   | MCF7 | -0.556 | -0.085 | 0.145 | 6488 |
| 670  | diethylstilbestrol          | 15 µM  | MCF7 | -0.557 | -0.066 | 0.164 | 3429 |
| 618  | dilazep                     | 6 µM   | HL60 | -0.557 | -0.073 | 0.157 | 2333 |
| 631  | Chicago Sky Blue 6B         | 4 µM   | HL60 | -0.557 | -0.064 | 0.166 | 1330 |
| 750  | nordihydroguaiaretic acid   | 1 µM   | HL60 | -0.557 | -0.097 | 0.134 | 6182 |
| 504  | felodipine                  | 10 µM  | MCF7 | -0.557 | -0.101 | 0.13  | 848  |
| 682  | vincamine                   | 11 µM  | PC3  | -0.557 | -0.081 | 0.15  | 3784 |
| 662  | epivincamine                | 11 µM  | MCF7 | -0.557 | -0.074 | 0.157 | 2775 |
| 1061 | SC-560                      | 10 µM  | MCF7 | -0.558 | -0.086 | 0.145 | 6913 |
| 654  | 7-aminocephalosporanic acid | 15 µM  | MCF7 | -0.558 | -0.076 | 0.155 | 3258 |
| 691  | solanine                    | 5 µM   | MCF7 | -0.558 | -0.115 | 0.116 | 4166 |
| 641  | (+)-chelidone               | 11 µM  | HL60 | -0.558 | -0.069 | 0.162 | 1786 |
| 649  | lithocholic acid            | 11 µM  | HL60 | -0.558 | -0.051 | 0.18  | 2571 |
| 730  | N6-methyladenosine          | 14 µM  | MCF7 | -0.559 | -0.062 | 0.17  | 5332 |
| 719  | hyoscyamine                 | 14 µM  | PC3  | -0.559 | -0.067 | 0.164 | 5099 |
| 640  | molsidomine                 | 17 µM  | HL60 | -0.559 | -0.068 | 0.163 | 1711 |
| 631  | myricetin                   | 13 µM  | HL60 | -0.559 | -0.071 | 0.161 | 1334 |
| 727  | valproic acid               | 500 µM | PC3  | -0.559 | -0.105 | 0.127 | 4464 |
| 733  | cinchonidine                | 14 µM  | PC3  | -0.56  | -0.089 | 0.143 | 5833 |
| 699  | monensin                    | 6 µM   | MCF7 | -0.56  | -0.08  | 0.152 | 4726 |
| 757  | monorden                    | 100 nM | MCF7 | -0.56  | -0.125 | 0.107 | 5579 |
| 688  | rifampicin                  | 5 µM   | PC3  | -0.56  | -0.057 | 0.175 | 4008 |
| 612  | phenazone                   | 21 µM  | HL60 | -0.561 | -0.115 | 0.117 | 1989 |
| 644  | seneciophylline             | 12 µM  | HL60 | -0.562 | -0.071 | 0.162 | 2140 |
| 736  | iproniazid                  | 14 µM  | MCF7 | -0.562 | -0.076 | 0.156 | 5458 |
| 1021 | 0225151-0000                | 10 µM  | PC3  | -0.562 | -0.106 | 0.127 | 6389 |
| 746  | ondansetron                 | 12 µM  | MCF7 | -0.562 | -0.108 | 0.125 | 6270 |

|      |                    |       |      |        |        |       |      |
|------|--------------------|-------|------|--------|--------|-------|------|
| 630  | benzbromarone      | 9 µM  | HL60 | -0.562 | -0.053 | 0.18  | 1291 |
| 705  | iocetamic acid     | 7 µM  | MCF7 | -0.562 | -0.104 | 0.129 | 4425 |
| 653  | arecoline          | 17 µM | MCF7 | -0.563 | -0.084 | 0.149 | 2657 |
| 736  | proxymetacaine     | 12 µM | MCF7 | -0.563 | -0.074 | 0.159 | 5433 |
| 644  | harman             | 18 µM | HL60 | -0.564 | -0.062 | 0.171 | 2150 |
| 634  | vigabatrin         | 31 µM | HL60 | -0.564 | -0.051 | 0.182 | 2452 |
| 616  | nicergoline        | 8 µM  | PC3  | -0.564 | -0.085 | 0.148 | 2058 |
| 741  | diphenhydramine    | 14 µM | MCF7 | -0.564 | -0.073 | 0.161 | 6020 |
| 611  | verapamil          | 8 µM  | PC3  | -0.564 | -0.046 | 0.188 | 1927 |
| 762  | tiletamine         | 15 µM | PC3  | -0.565 | -0.076 | 0.158 | 7311 |
| 616  | thiopropazine      | 6 µM  | PC3  | -0.565 | -0.112 | 0.122 | 2073 |
| 677  | betulin            | 9 µM  | MCF7 | -0.565 | -0.083 | 0.151 | 3513 |
| 683  | paroxetine         | 1 µM  | PC3  | -0.566 | -0.096 | 0.139 | 3821 |
| 702  | indapamide         | 11 µM | PC3  | -0.567 | -0.149 | 0.086 | 4335 |
| 636  | triamcinolone      | 10 µM | MCF7 | -0.567 | -0.124 | 0.111 | 2241 |
| 711  | indapamide         | 11 µM | MCF7 | -0.567 | -0.116 | 0.119 | 3970 |
| 55   | rosiglitazone      | 10 µM | PC3  | -0.568 | -0.1   | 0.135 | 430  |
| 614  | nocodazole         | 13 µM | HL60 | -0.569 | -0.048 | 0.187 | 1393 |
| 698  | riluzole           | 15 µM | PC3  | -0.569 | -0.078 | 0.157 | 7365 |
| 636  | nocodazole         | 13 µM | MCF7 | -0.57  | -0.112 | 0.123 | 2239 |
| 505  | 5151277            | 14 µM | MCF7 | -0.57  | -0.091 | 0.145 | 903  |
| 1081 | CP-319743          | 10 µM | PC3  | -0.57  | -0.102 | 0.134 | 7491 |
| 693  | cefalonium         | 9 µM  | PC3  | -0.57  | -0.119 | 0.116 | 4245 |
| 90   | splitomicin        | 20 µM | PC3  | -0.57  | -0.106 | 0.13  | 661  |
| 630  | ketoconazole       | 8 µM  | HL60 | -0.57  | -0.083 | 0.153 | 1285 |
| 661  | tiletamine         | 15 µM | HL60 | -0.57  | -0.06  | 0.176 | 3137 |
| 641  | demecarium bromide | 6 µM  | HL60 | -0.571 | -0.051 | 0.185 | 1781 |
| 726  | clofazimine        | 8 µM  | MCF7 | -0.571 | -0.122 | 0.114 | 5277 |
| 728  | (-)-isoprenaline   | 16 µM | PC3  | -0.571 | -0.088 | 0.148 | 4495 |
| 728  | furosemide         | 12 µM | PC3  | -0.572 | -0.065 | 0.171 | 4503 |
| 711  | dicoumarol         | 12 µM | MCF7 | -0.572 | -0.065 | 0.172 | 3941 |
| 713  | pentetic acid      | 10 µM | PC3  | -0.573 | -0.061 | 0.176 | 4669 |
| 699  | salbutamol         | 17 µM | MCF7 | -0.573 | -0.083 | 0.154 | 4700 |
| 762  | ribavirin          | 16 µM | PC3  | -0.573 | -0.079 | 0.158 | 7316 |
| 629  | betazole           | 27 µM | HL60 | -0.574 | -0.104 | 0.134 | 1854 |
| 8    | amitriptyline      | 1 µM  | MCF7 | -0.574 | -0.125 | 0.113 | 167  |
| 710  | lisuride           | 12 µM | PC3  | -0.574 | -0.094 | 0.144 | 6682 |

|      |                                   |        |      |        |        |       |      |
|------|-----------------------------------|--------|------|--------|--------|-------|------|
| 657  | dihydroergocristine               | 6 µM   | MCF7 | -0.574 | -0.114 | 0.123 | 2895 |
| 614  | disulfiram                        | 13 µM  | HL60 | -0.574 | -0.067 | 0.171 | 1369 |
| 629  | naproxen                          | 17 µM  | HL60 | -0.575 | -0.07  | 0.168 | 1869 |
| 711  | piperacillin                      | 7 µM   | MCF7 | -0.575 | -0.113 | 0.125 | 3939 |
| 1093 | IC-86621                          | 1 µM   | PC3  | -0.575 | -0.101 | 0.137 | 7548 |
| 616  | tetracycline                      | 8 µM   | PC3  | -0.576 | -0.068 | 0.17  | 2080 |
| 683  | CP-690334-01                      | 1 µM   | PC3  | -0.576 | -0.09  | 0.149 | 3826 |
| 711  | dantrolene                        | 12 µM  | MCF7 | -0.576 | -0.072 | 0.166 | 3978 |
| 687  | ciclacillin                       | 12 µM  | MCF7 | -0.576 | -0.076 | 0.163 | 3882 |
| 750  | tanespimycin                      | 1 µM   | HL60 | -0.576 | -0.108 | 0.131 | 6177 |
| 704  | naringenin                        | 15 µM  | PC3  | -0.576 | -0.094 | 0.144 | 4597 |
| 743  | tamoxifen                         | 7 µM   | MCF7 | -0.576 | -0.124 | 0.115 | 6768 |
| 673  | bemegride                         | 26 µM  | MCF7 | -0.577 | -0.097 | 0.142 | 3389 |
| 695  | indoprofen                        | 14 µM  | MCF7 | -0.577 | -0.054 | 0.185 | 4832 |
| 658  | nadolol                           | 13 µM  | HL60 | -0.577 | -0.064 | 0.175 | 3020 |
| 720  | citalopram                        | 1 µM   | MCF7 | -0.577 | -0.069 | 0.17  | 4377 |
| 623  | chlorpropamide                    | 14 µM  | HL60 | -0.577 | -0.073 | 0.166 | 1594 |
| 1084 | 16-phenyltetranorprostaglandin E2 | 10 µM  | MCF7 | -0.577 | -0.114 | 0.125 | 7505 |
| 755  | desoxycortone                     | 12 µM  | MCF7 | -0.578 | -0.124 | 0.115 | 6476 |
| 612  | minaprine                         | 11 µM  | HL60 | -0.578 | -0.126 | 0.113 | 1968 |
| 658  | nafcillin                         | 9 µM   | HL60 | -0.578 | -0.055 | 0.185 | 2983 |
| 656  | tetramisole                       | 17 µM  | MCF7 | -0.578 | -0.08  | 0.159 | 2849 |
| 735  | chlorhexidine                     | 8 µM   | MCF7 | -0.579 | -0.087 | 0.153 | 5403 |
| 90   | docosahexaenoic acid ethyl ester  | 100 µM | PC3  | -0.579 | -0.106 | 0.133 | 664  |
| 728  | hydrocotarnine                    | 13 µM  | PC3  | -0.579 | -0.108 | 0.131 | 4489 |
| 654  | ciclosporin                       | 3 µM   | MCF7 | -0.579 | -0.079 | 0.16  | 3267 |
| 741  | nifenazone                        | 13 µM  | MCF7 | -0.58  | -0.123 | 0.117 | 6016 |
| 633  | metolazone                        | 11 µM  | MCF7 | -0.58  | -0.06  | 0.18  | 1514 |
| 637  | flumequine                        | 15 µM  | MCF7 | -0.58  | -0.114 | 0.126 | 2276 |
| 632  | minaprine                         | 11 µM  | MCF7 | -0.58  | -0.099 | 0.142 | 1468 |
| 681  | myosmine                          | 27 µM  | PC3  | -0.58  | -0.052 | 0.189 | 3737 |
| 636  | disulfiram                        | 13 µM  | MCF7 | -0.581 | -0.081 | 0.16  | 2215 |
| 761  | Prestwick-1082                    | 12 µM  | PC3  | -0.582 | -0.07  | 0.171 | 7267 |
| 658  | tetroquinone                      | 21 µM  | HL60 | -0.582 | -0.067 | 0.174 | 2999 |
| 680  | levomepromazine                   | 9 µM   | PC3  | -0.582 | -0.072 | 0.169 | 3701 |
| 636  | isoconazole                       | 10 µM  | MCF7 | -0.582 | -0.074 | 0.167 | 2218 |
| 713  | biperiden                         | 11 µM  | PC3  | -0.582 | -0.08  | 0.161 | 4684 |

|      |                           |       |      |        |        |       |      |
|------|---------------------------|-------|------|--------|--------|-------|------|
| 695  | picrotoxinin              | 14 µM | MCF7 | -0.582 | -0.089 | 0.152 | 4842 |
| 736  | scopolamine N-oxide       | 10 µM | MCF7 | -0.582 | -0.093 | 0.148 | 5436 |
| 628  | nifedipine                | 12 µM | PC3  | -0.583 | -0.057 | 0.184 | 1814 |
| 671  | mevalolactone             | 31 µM | MCF7 | -0.583 | -0.086 | 0.155 | 3459 |
| 623  | clenbuterol               | 13 µM | HL60 | -0.583 | -0.105 | 0.136 | 1613 |
| 616  | dihydroergotamine         | 3 µM  | PC3  | -0.583 | -0.107 | 0.134 | 2081 |
| 751  | diphenylpyraline          | 13 µM | MCF7 | -0.583 | -0.115 | 0.126 | 6061 |
| 731  | pheneticillin             | 10 µM | PC3  | -0.583 | -0.074 | 0.167 | 5763 |
| 678  | piperacetazine            | 10 µM | MCF7 | -0.583 | -0.09  | 0.151 | 3574 |
| 663  | Prestwick-642             | 14 µM | MCF7 | -0.583 | -0.06  | 0.182 | 2815 |
| 631  | primaquine                | 9 µM  | HL60 | -0.584 | -0.041 | 0.2   | 1343 |
| 715  | hemicholinium             | 7 µM  | PC3  | -0.584 | -0.08  | 0.162 | 6739 |
| 640  | mometasone                | 8 µM  | HL60 | -0.584 | -0.092 | 0.15  | 1746 |
| 649  | monensin                  | 6 µM  | HL60 | -0.584 | -0.124 | 0.118 | 2580 |
| 726  | pirenperone               | 10 µM | MCF7 | -0.584 | -0.097 | 0.145 | 5274 |
| 1077 | SC-19220                  | 10 µM | PC3  | -0.585 | -0.067 | 0.175 | 7095 |
| 685  | gossypol                  | 8 µM  | MCF7 | -0.585 | -0.143 | 0.099 | 3637 |
| 677  | penbutolol                | 6 µM  | MCF7 | -0.585 | -0.072 | 0.17  | 3534 |
| 685  | sulfamethoxypyridazine    | 14 µM | MCF7 | -0.586 | -0.1   | 0.143 | 3609 |
| 744  | iopromide                 | 5 µM  | MCF7 | -0.586 | -0.106 | 0.137 | 6842 |
| 737  | pivampicillin             | 9 µM  | MCF7 | -0.586 | -0.091 | 0.152 | 5465 |
| 671  | proadifen                 | 10 µM | MCF7 | -0.587 | -0.098 | 0.145 | 3446 |
| 748  | ramifenazone              | 14 µM | MCF7 | -0.587 | -0.092 | 0.151 | 7233 |
| 653  | N6-methyladenosine        | 14 µM | MCF7 | -0.587 | -0.116 | 0.127 | 2626 |
| 726  | loperamide                | 8 µM  | MCF7 | -0.587 | -0.132 | 0.111 | 5267 |
| 754  | naproxen                  | 17 µM | PC3  | -0.587 | -0.041 | 0.202 | 6358 |
| 1040 | alprostadil               | 10 µM | PC3  | -0.587 | -0.058 | 0.185 | 6571 |
| 695  | fosfosal                  | 18 µM | MCF7 | -0.587 | -0.075 | 0.168 | 4823 |
| 748  | gentamicin                | 3 µM  | MCF7 | -0.587 | -0.081 | 0.162 | 7237 |
| 66   | celecoxib                 | 10 µM | PC3  | -0.587 | -0.108 | 0.135 | 482  |
| 688  | N-acetyl-L-aspartic acid  | 23 µM | PC3  | -0.588 | -0.053 | 0.191 | 4007 |
| 623  | alfuzosin                 | 9 µM  | HL60 | -0.588 | -0.079 | 0.164 | 1586 |
| 737  | levopropoxyphene          | 7 µM  | MCF7 | -0.589 | -0.066 | 0.178 | 5503 |
| 603  | nordihydroguaiaretic acid | 1 µM  | PC3  | -0.589 | -0.07  | 0.174 | 1223 |
| 737  | harmalol                  | 15 µM | MCF7 | -0.589 | -0.1   | 0.143 | 5495 |
| 683  | CP-320650-01              | 10 µM | PC3  | -0.589 | -0.084 | 0.16  | 3822 |
| 681  | heliotrine                | 13 µM | PC3  | -0.589 | -0.124 | 0.12  | 3717 |

|      |                   |        |      |        |        |       |      |
|------|-------------------|--------|------|--------|--------|-------|------|
| 688  | brompheniramine   | 9 µM   | PC3  | -0.59  | -0.074 | 0.17  | 4013 |
| 645  | pramocaine        | 12 µM  | HL60 | -0.59  | -0.085 | 0.16  | 2198 |
| 733  | podophyllotoxin   | 10 µM  | PC3  | -0.59  | -0.073 | 0.172 | 5841 |
| 634  | pirenperone       | 10 µM  | HL60 | -0.591 | -0.046 | 0.199 | 2455 |
| 647  | zaprinast         | 15 µM  | MCF7 | -0.591 | -0.086 | 0.159 | 3226 |
| 735  | dinoprost         | 8 µM   | MCF7 | -0.591 | -0.065 | 0.18  | 5409 |
| 699  | nalidixic acid    | 15 µM  | MCF7 | -0.591 | -0.092 | 0.153 | 4691 |
| 661  | alfadolone        | 10 µM  | HL60 | -0.592 | -0.044 | 0.201 | 3127 |
| 648  | butamben          | 21 µM  | HL60 | -0.592 | -0.063 | 0.182 | 2531 |
| 682  | ethisterone       | 13 µM  | PC3  | -0.592 | -0.12  | 0.125 | 3783 |
| 745  | cicloheximide     | 14 µM  | MCF7 | -0.592 | -0.07  | 0.175 | 6220 |
| 730  | fluoxetine        | 12 µM  | MCF7 | -0.592 | -0.111 | 0.134 | 5356 |
| 659  | diloxanide        | 12 µM  | HL60 | -0.592 | -0.096 | 0.15  | 3062 |
| 632  | minoxidil         | 19 µM  | MCF7 | -0.593 | -0.073 | 0.172 | 1496 |
| 656  | cefaclor          | 10 µM  | MCF7 | -0.593 | -0.066 | 0.179 | 2843 |
| 719  | carbamazepine     | 17 µM  | PC3  | -0.593 | -0.064 | 0.182 | 5093 |
| 703  | parbendazole      | 16 µM  | PC3  | -0.593 | -0.092 | 0.153 | 4535 |
| 1031 | AG-013608         | 10 µM  | PC3  | -0.594 | -0.119 | 0.127 | 6440 |
| 683  | CP-690334-01      | 10 µM  | PC3  | -0.594 | -0.157 | 0.089 | 3823 |
| 748  | acenocoumarol     | 11 µM  | MCF7 | -0.594 | -0.086 | 0.16  | 7232 |
| 1067 | 0316684-0000      | 10 µM  | PC3  | -0.595 | -0.083 | 0.163 | 7057 |
| 514  | 12,13-EODE        | 200 nM | MCF7 | -0.595 | -0.054 | 0.193 | 1108 |
| 708  | felbinac          | 19 µM  | MCF7 | -0.595 | -0.069 | 0.177 | 5700 |
| 762  | ethosuximide      | 28 µM  | PC3  | -0.595 | -0.078 | 0.168 | 7308 |
| 1062 | H-89              | 500 nM | PC3  | -0.595 | -0.074 | 0.172 | 6921 |
| 633  | chlortetracycline | 8 µM   | MCF7 | -0.595 | -0.087 | 0.16  | 1541 |
| 623  | dobutamine        | 12 µM  | HL60 | -0.595 | -0.119 | 0.127 | 1589 |
| 650  | clozapine         | 10 µM  | HL60 | -0.596 | -0.134 | 0.112 | 2689 |
| 726  | haloperidol       | 11 µM  | MCF7 | -0.596 | -0.142 | 0.105 | 5273 |
| 691  | gelsemine         | 12 µM  | MCF7 | -0.596 | -0.076 | 0.171 | 4177 |
| 623  | clorgiline        | 13 µM  | HL60 | -0.596 | -0.094 | 0.153 | 1604 |
| 648  | leflunomide       | 15 µM  | HL60 | -0.596 | -0.087 | 0.16  | 2539 |
| 602  | troglitazone      | 10 µM  | HL60 | -0.596 | -0.103 | 0.144 | 1173 |
| 741  | heptaminol        | 22 µM  | MCF7 | -0.597 | -0.081 | 0.166 | 6015 |
| 735  | metitepine        | 8 µM   | MCF7 | -0.597 | -0.132 | 0.115 | 5413 |
| 633  | paclitaxel        | 5 µM   | MCF7 | -0.597 | -0.095 | 0.152 | 1542 |
| 706  | retrorsine        | 11 µM  | MCF7 | -0.597 | -0.076 | 0.171 | 4946 |

|      |                     |       |      |        |        |       |      |
|------|---------------------|-------|------|--------|--------|-------|------|
| 627  | amitriptyline       | 13 µM | MCF7 | -0.597 | -0.128 | 0.119 | 1701 |
| 1095 | BCB000040           | 10 µM | PC3  | -0.598 | -0.078 | 0.169 | 7559 |
| 735  | paracetamol         | 26 µM | MCF7 | -0.598 | -0.073 | 0.174 | 5384 |
| 719  | rilmnidine          | 8 µM  | PC3  | -0.598 | -0.113 | 0.135 | 5107 |
| 699  | PNU-0251126         | 10 µM | MCF7 | -0.598 | -0.113 | 0.134 | 4711 |
| 715  | adenosine phosphate | 11 µM | PC3  | -0.598 | -0.101 | 0.147 | 6760 |
| 681  | 0179445-0000        | 1 µM  | PC3  | -0.599 | -0.078 | 0.17  | 3736 |
| 665  | loracarbef          | 11 µM | HL60 | -0.599 | -0.045 | 0.203 | 2970 |
| 752  | phenazopyridine     | 16 µM | MCF7 | -0.599 | -0.126 | 0.122 | 6100 |
| 641  | vinburnine          | 14 µM | HL60 | -0.599 | -0.099 | 0.149 | 1788 |
| 762  | Prestwick-1103      | 20 µM | PC3  | -0.6   | -0.057 | 0.191 | 7317 |
| 772  | trapidil            | 19 µM | MCF7 | -0.6   | -0.11  | 0.138 | 7475 |
| 761  | thiamphenicol       | 11 µM | PC3  | -0.6   | -0.1   | 0.149 | 7274 |
| 629  | isoxicam            | 12 µM | HL60 | -0.601 | -0.056 | 0.193 | 1862 |
| 729  | debrisoquine        | 9 µM  | MCF7 | -0.601 | -0.071 | 0.178 | 5288 |
| 505  | ikarugamycin        | 2 µM  | MCF7 | -0.601 | -0.067 | 0.182 | 918  |
| 737  | gemfibrozil         | 16 µM | MCF7 | -0.601 | -0.09  | 0.158 | 5488 |
| 735  | hexetidine          | 12 µM | MCF7 | -0.602 | -0.14  | 0.109 | 5420 |
| 730  | benfluorex          | 10 µM | MCF7 | -0.602 | -0.059 | 0.19  | 5327 |
| 618  | mebendazole         | 14 µM | HL60 | -0.602 | -0.092 | 0.157 | 2338 |
| 623  | practolol           | 15 µM | HL60 | -0.603 | -0.137 | 0.113 | 1587 |
| 725  | valproic acid       | 1 mM  | MCF7 | -0.603 | -0.13  | 0.12  | 5206 |
| 1023 | F0447-0125          | 10 µM | PC3  | -0.604 | -0.101 | 0.149 | 6401 |
| 1040 | Gly-His-Lys         | 1 µM  | PC3  | -0.604 | -0.055 | 0.195 | 6570 |
| 689  | Prestwick-691       | 14 µM | PC3  | -0.604 | -0.098 | 0.152 | 4092 |
| 736  | naproxen            | 17 µM | MCF7 | -0.604 | -0.055 | 0.195 | 5457 |
| 676  | memantine           | 19 µM | MCF7 | -0.604 | -0.116 | 0.135 | 7354 |
| 687  | phenelzine          | 17 µM | MCF7 | -0.605 | -0.095 | 0.156 | 3884 |
| 635  | tenoxicam           | 12 µM | HL60 | -0.605 | -0.059 | 0.191 | 2501 |
| 59   | arachidonic acid    | 10 µM | MCF7 | -0.605 | -0.134 | 0.116 | 441  |
| 688  | sisomicin           | 3 µM  | PC3  | -0.606 | -0.104 | 0.146 | 4014 |
| 636  | midodrine           | 14 µM | MCF7 | -0.606 | -0.089 | 0.162 | 2250 |
| 767  | LY-294002           | 10 µM | MCF7 | -0.606 | -0.101 | 0.15  | 6956 |
| 632  | niclosamide         | 12 µM | MCF7 | -0.607 | -0.118 | 0.133 | 1498 |
| 616  | isoniazid           | 29 µM | PC3  | -0.607 | -0.087 | 0.164 | 2083 |
| 680  | monensin            | 6 µM  | PC3  | -0.607 | -0.101 | 0.15  | 3704 |
| 623  | nicardipine         | 8 µM  | HL60 | -0.608 | -0.067 | 0.184 | 1600 |

|      |                         |        |      |        |        |       |      |
|------|-------------------------|--------|------|--------|--------|-------|------|
| 687  | pramocaine              | 12 µM  | MCF7 | -0.608 | -0.113 | 0.138 | 3894 |
| 676  | gibberellic acid        | 12 µM  | MCF7 | -0.608 | -0.082 | 0.17  | 7330 |
| 1010 | valinomycin             | 100 nM | MCF7 | -0.609 | -0.097 | 0.155 | 5957 |
| 758  | thioperamide            | 10 µM  | MCF7 | -0.609 | -0.094 | 0.158 | 5635 |
| 513  | wortmannin              | 10 nM  | MCF7 | -0.609 | -0.118 | 0.134 | 1081 |
| 710  | etynodiol               | 10 µM  | PC3  | -0.609 | -0.125 | 0.127 | 6678 |
| 634  | cephaeline              | 6 µM   | HL60 | -0.609 | -0.07  | 0.183 | 2429 |
| 741  | gliquidone              | 8 µM   | MCF7 | -0.609 | -0.095 | 0.157 | 6004 |
| 678  | ramipril                | 10 µM  | MCF7 | -0.609 | -0.104 | 0.149 | 3572 |
| 726  | biperiden               | 11 µM  | MCF7 | -0.609 | -0.099 | 0.154 | 5279 |
| 603  | LY-294002               | 10 µM  | PC3  | -0.609 | -0.134 | 0.118 | 1239 |
| 614  | terfenadine             | 8 µM   | HL60 | -0.61  | -0.141 | 0.111 | 1381 |
| 709  | methyldopate            | 15 µM  | PC3  | -0.61  | -0.086 | 0.167 | 6640 |
| 713  | testosterone            | 12 µM  | PC3  | -0.61  | -0.102 | 0.151 | 4676 |
| 761  | meclofenamic acid       | 12 µM  | PC3  | -0.61  | -0.1   | 0.152 | 7280 |
| 676  | zardaverine             | 15 µM  | MCF7 | -0.611 | -0.102 | 0.15  | 7347 |
| 649  | glycopyrronium bromide  | 10 µM  | HL60 | -0.611 | -0.052 | 0.201 | 2565 |
| 514  | demecolcine             | 12 µM  | MCF7 | -0.611 | -0.107 | 0.146 | 1103 |
| 743  | chlortalidone           | 12 µM  | MCF7 | -0.611 | -0.08  | 0.173 | 6800 |
| 757  | sirolimus               | 100 nM | MCF7 | -0.611 | -0.113 | 0.14  | 5602 |
| 771  | minocycline             | 8 µM   | MCF7 | -0.612 | -0.074 | 0.179 | 7436 |
| 502  | ikarugamycin            | 2 µM   | MCF7 | -0.613 | -0.088 | 0.165 | 974  |
| 712  | androsterone            | 14 µM  | PC3  | -0.613 | -0.077 | 0.176 | 4635 |
| 726  | 3-hydroxy-DL-kynurenine | 18 µM  | MCF7 | -0.613 | -0.082 | 0.171 | 5276 |
| 771  | perhexiline             | 10 µM  | MCF7 | -0.613 | -0.115 | 0.138 | 7441 |
| 681  | isosorbide              | 17 µM  | PC3  | -0.613 | -0.056 | 0.198 | 3720 |
| 43   | sodium phenylbutyrate   | 1 mM   | MCF7 | -0.614 | -0.108 | 0.146 | 407  |
| 750  | sirolimus               | 100 nM | HL60 | -0.614 | -0.063 | 0.191 | 6167 |
| 744  | terfenadine             | 8 µM   | MCF7 | -0.614 | -0.115 | 0.139 | 6823 |
| 702  | spiramycin              | 5 µM   | PC3  | -0.614 | -0.073 | 0.181 | 4319 |
| 772  | spaglumic acid          | 13 µM  | MCF7 | -0.616 | -0.091 | 0.164 | 7465 |
| 706  | harmaline               | 14 µM  | MCF7 | -0.616 | -0.117 | 0.138 | 4968 |
| 26b  | LY-294002               | 10 µM  | MCF7 | -0.616 | -0.143 | 0.112 | 328  |
| 772  | Prestwick-983           | 17 µM  | MCF7 | -0.616 | -0.054 | 0.201 | 7480 |
| 762  | nifenazone              | 13 µM  | PC3  | -0.616 | -0.115 | 0.141 | 7314 |
| 754  | amitriptyline           | 13 µM  | PC3  | -0.617 | -0.131 | 0.125 | 6353 |
| 616  | pindolol                | 16 µM  | PC3  | -0.617 | -0.069 | 0.187 | 2075 |

|      |                    |        |      |        |        |       |      |
|------|--------------------|--------|------|--------|--------|-------|------|
| 748  | mesalazine         | 26 µM  | MCF7 | -0.617 | -0.07  | 0.186 | 7241 |
| 632  | levodopa           | 20 µM  | MCF7 | -0.618 | -0.101 | 0.155 | 1472 |
| 657  | tetracaine         | 13 µM  | MCF7 | -0.618 | -0.115 | 0.141 | 2888 |
| 731  | racecadotril       | 10 µM  | PC3  | -0.618 | -0.1   | 0.156 | 5755 |
| 736  | iopanoic acid      | 7 µM   | MCF7 | -0.618 | -0.106 | 0.15  | 5448 |
| 754  | 10-methoxyharmalan | 19 µM  | PC3  | -0.618 | -0.14  | 0.116 | 6355 |
| 649  | calcium folinate   | 8 µM   | HL60 | -0.618 | -0.067 | 0.189 | 2579 |
| 733  | folic acid         | 9 µM   | PC3  | -0.618 | -0.065 | 0.191 | 5844 |
| 683  | lycorine           | 12 µM  | PC3  | -0.619 | -0.07  | 0.186 | 3808 |
| 681  | betonicine         | 25 µM  | PC3  | -0.619 | -0.078 | 0.178 | 3745 |
| 728  | diperodon          | 9 µM   | PC3  | -0.619 | -0.109 | 0.147 | 4498 |
| 636  | ampyrone           | 20 µM  | MCF7 | -0.619 | -0.127 | 0.129 | 2249 |
| 745  | trichostatin A     | 100 nM | MCF7 | -0.619 | -0.09  | 0.167 | 6222 |
| 631  | lactobionic acid   | 11 µM  | HL60 | -0.619 | -0.073 | 0.184 | 1309 |
| 686  | phentolamine       | 13 µM  | MCF7 | -0.62  | -0.08  | 0.177 | 3860 |
| 725  | estradiol          | 10 nM  | MCF7 | -0.62  | -0.067 | 0.189 | 5238 |
| 632  | captopril          | 17 µM  | MCF7 | -0.62  | -0.117 | 0.14  | 1488 |
| 632  | amylocaine         | 15 µM  | MCF7 | -0.62  | -0.064 | 0.192 | 1491 |
| 633  | chlorhexidine      | 8 µM   | MCF7 | -0.62  | -0.132 | 0.125 | 1525 |
| 632  | lidocaine          | 15 µM  | MCF7 | -0.62  | -0.075 | 0.181 | 1499 |
| 761  | enalapril          | 8 µM   | PC3  | -0.621 | -0.109 | 0.148 | 7265 |
| 685  | foliosidine        | 13 µM  | MCF7 | -0.621 | -0.115 | 0.142 | 3636 |
| 677  | Prestwick-1083     | 9 µM   | MCF7 | -0.622 | -0.078 | 0.179 | 3538 |
| 629  | thiamphenicol      | 11 µM  | HL60 | -0.622 | -0.071 | 0.187 | 1867 |
| 505  | topiramate         | 3 µM   | MCF7 | -0.622 | -0.078 | 0.179 | 915  |
| 703  | orphenadrine       | 13 µM  | PC3  | -0.622 | -0.126 | 0.132 | 4537 |
| 677  | viomycin           | 5 µM   | MCF7 | -0.623 | -0.098 | 0.159 | 3541 |
| 677  | prednicarbate      | 8 µM   | MCF7 | -0.623 | -0.06  | 0.198 | 3542 |
| 720  | CP-690334-01       | 10 µM  | MCF7 | -0.623 | -0.17  | 0.088 | 4380 |
| 746  | alpha-yohimbine    | 10 µM  | MCF7 | -0.623 | -0.112 | 0.146 | 6274 |
| 688  | cinchonine         | 14 µM  | PC3  | -0.623 | -0.11  | 0.148 | 3988 |
| 703  | CP-320650-01       | 1 µM   | PC3  | -0.623 | -0.066 | 0.192 | 4560 |
| 743  | drofenine          | 11 µM  | MCF7 | -0.624 | -0.07  | 0.188 | 6776 |
| 646  | ketotifen          | 9 µM   | MCF7 | -0.624 | -0.067 | 0.191 | 3200 |
| 632  | metronidazole      | 23 µM  | MCF7 | -0.624 | -0.085 | 0.173 | 1503 |
| 637  | cloxacillin        | 9 µM   | MCF7 | -0.624 | -0.077 | 0.182 | 2289 |
| 1055 | pioglitazone       | 10 µM  | MCF7 | -0.625 | -0.071 | 0.188 | 6898 |



|      |                                 |       |      |        |        |       |      |
|------|---------------------------------|-------|------|--------|--------|-------|------|
| 746  | butamben                        | 21 µM | MCF7 | -0.625 | -0.07  | 0.189 | 6266 |
| 747  | cefotaxime                      | 8 µM  | MCF7 | -0.625 | -0.06  | 0.199 | 7186 |
| 659  | eticlopride                     | 11 µM | HL60 | -0.626 | -0.109 | 0.15  | 3056 |
| 757  | wortmannin                      | 10 nM | MCF7 | -0.626 | -0.114 | 0.146 | 5603 |
| 728  | benzylpenicillin                | 11 µM | PC3  | -0.626 | -0.114 | 0.145 | 4501 |
| 661  | pizotifen                       | 9 µM  | HL60 | -0.627 | -0.092 | 0.167 | 3134 |
| 683  | PHA-00745360                    | 1 µM  | PC3  | -0.627 | -0.057 | 0.202 | 3827 |
| 635  | pregnenolone                    | 13 µM | HL60 | -0.627 | -0.085 | 0.175 | 2497 |
| 745  | etanidazole                     | 19 µM | MCF7 | -0.628 | -0.112 | 0.148 | 6211 |
| 654  | lysergol                        | 16 µM | MCF7 | -0.628 | -0.135 | 0.125 | 3261 |
| 626  | fulvestrant                     | 10 nM | MCF7 | -0.629 | -0.089 | 0.171 | 1663 |
| 700  | karakoline                      | 11 µM | MCF7 | -0.629 | -0.082 | 0.179 | 4763 |
| 637  | pentoxifylline                  | 14 µM | MCF7 | -0.629 | -0.102 | 0.159 | 2290 |
| 636  | diazoxide                       | 17 µM | MCF7 | -0.629 | -0.102 | 0.158 | 2214 |
| 735  | 2-aminobenzenesulfonamide       | 23 µM | MCF7 | -0.629 | -0.075 | 0.185 | 5422 |
| 1047 | 5194442                         | 20 µM | MCF7 | -0.63  | -0.135 | 0.125 | 6599 |
| 616  | tranexamic acid                 | 25 µM | PC3  | -0.63  | -0.067 | 0.194 | 2085 |
| 1081 | 15(S)-15-methylprostaglandin E2 | 10 µM | PC3  | -0.63  | -0.107 | 0.154 | 7494 |
| 673  | xamoterol                       | 5 µM  | MCF7 | -0.63  | -0.081 | 0.18  | 3401 |
| 689  | 4-hydroxyphenazone              | 20 µM | PC3  | -0.631 | -0.146 | 0.115 | 4095 |
| 647  | clofazimine                     | 8 µM  | MCF7 | -0.632 | -0.07  | 0.191 | 3239 |
| 630  | hesperidin                      | 7 µM  | HL60 | -0.632 | -0.069 | 0.193 | 1294 |
| 707  | dicloxacillin                   | 8 µM  | MCF7 | -0.632 | -0.057 | 0.204 | 5012 |
| 727  | tanespimycin                    | 1 µM  | PC3  | -0.632 | -0.159 | 0.103 | 4449 |
| 688  | Prestwick-864                   | 35 µM | PC3  | -0.632 | -0.111 | 0.15  | 3994 |
| 670  | calcium folinate                | 8 µM  | MCF7 | -0.632 | -0.054 | 0.208 | 3442 |
| 637  | metampicillin                   | 10 µM | MCF7 | -0.632 | -0.13  | 0.131 | 2286 |
| 688  | amiprilose                      | 12 µM | PC3  | -0.632 | -0.063 | 0.199 | 4000 |
| 682  | fludrocortisone                 | 9 µM  | PC3  | -0.633 | -0.099 | 0.163 | 3785 |
| 671  | bucladesine                     | 8 µM  | MCF7 | -0.633 | -0.09  | 0.172 | 3483 |
| 33   | valproic acid                   | 50 µM | MCF7 | -0.633 | -0.117 | 0.145 | 348  |
| 725  | haloperidol                     | 10 µM | MCF7 | -0.633 | -0.08  | 0.182 | 5241 |
| 728  | clidinium bromide               | 9 µM  | PC3  | -0.633 | -0.106 | 0.156 | 4499 |
| 687  | diethylstilbestrol              | 15 µM | MCF7 | -0.634 | -0.111 | 0.152 | 3895 |
| 744  | metoprolol                      | 6 µM  | MCF7 | -0.634 | -0.095 | 0.167 | 6846 |
| 617  | mefexamide                      | 13 µM | PC3  | -0.634 | -0.046 | 0.217 | 2121 |
| 627  | diphenhydramine                 | 14 µM | MCF7 | -0.635 | -0.089 | 0.174 | 1708 |

|      |                       |        |      |        |        |       |      |
|------|-----------------------|--------|------|--------|--------|-------|------|
| 677  | pivmecillinam         | 8 µM   | MCF7 | -0.635 | -0.091 | 0.171 | 3535 |
| 647  | adenosine phosphate   | 11 µM  | MCF7 | -0.635 | -0.097 | 0.166 | 3237 |
| 689  | alprostadil           | 11 µM  | PC3  | -0.636 | -0.091 | 0.173 | 4099 |
| 661  | trapidil              | 19 µM  | HL60 | -0.636 | -0.087 | 0.176 | 3136 |
| 16   | LM-1685               | 10 µM  | MCF7 | -0.637 | -0.12  | 0.143 | 207  |
| 713  | methyldopa            | 19 µM  | PC3  | -0.637 | -0.054 | 0.209 | 4677 |
| 43   | sodium phenylbutyrate | 1 mM   | MCF7 | -0.637 | -0.124 | 0.139 | 408  |
| 610  | pyrimethamine         | 16 µM  | PC3  | -0.637 | -0.117 | 0.147 | 1894 |
| 765  | haloperidol           | 10 µM  | MCF7 | -0.638 | -0.062 | 0.202 | 7003 |
| 1064 | lomustine             | 100 µM | MCF7 | -0.638 | -0.133 | 0.131 | 7045 |
| 690  | brompheniramine       | 9 µM   | MCF7 | -0.638 | -0.077 | 0.187 | 4131 |
| 663  | Prestwick-682         | 6 µM   | MCF7 | -0.638 | -0.083 | 0.181 | 2819 |
| 655  | pilocarpine           | 15 µM  | MCF7 | -0.639 | -0.102 | 0.162 | 3300 |
| 1081 | fulvestrant           | 1 µM   | PC3  | -0.639 | -0.111 | 0.154 | 7495 |
| 698  | sulfamethoxazole      | 16 µM  | PC3  | -0.639 | -0.079 | 0.185 | 7366 |
| 506  | haloperidol           | 10 µM  | MCF7 | -0.64  | -0.08  | 0.185 | 1024 |
| 680  | isocarboxazid         | 17 µM  | PC3  | -0.641 | -0.12  | 0.145 | 3684 |
| 642  | orphenadrine          | 13 µM  | MCF7 | -0.641 | -0.091 | 0.174 | 2318 |
| 735  | cefoperazone          | 6 µM   | MCF7 | -0.641 | -0.084 | 0.182 | 5424 |
| 752  | metoprolol            | 6 µM   | MCF7 | -0.641 | -0.087 | 0.178 | 6106 |
| 627  | atracurium besilate   | 3 µM   | MCF7 | -0.642 | -0.095 | 0.171 | 1702 |
| 678  | mesalazine            | 26 µM  | MCF7 | -0.642 | -0.087 | 0.179 | 3584 |
| 645  | karakoline            | 11 µM  | HL60 | -0.642 | -0.124 | 0.142 | 2203 |
| 660  | dexibuprofen          | 19 µM  | HL60 | -0.642 | -0.079 | 0.187 | 3094 |
| 749  | mephentoin            | 18 µM  | HL60 | -0.643 | -0.115 | 0.151 | 6158 |
| 688  | cefotetan             | 7 µM   | PC3  | -0.643 | -0.14  | 0.127 | 3997 |
| 698  | merbromin             | 5 µM   | PC3  | -0.643 | -0.14  | 0.126 | 7398 |
| 761  | triprolidine          | 13 µM  | PC3  | -0.643 | -0.086 | 0.18  | 7248 |
| 706  | glimepiride           | 8 µM   | MCF7 | -0.644 | -0.102 | 0.165 | 4973 |
| 514  | minocycline           | 11 µM  | MCF7 | -0.644 | -0.067 | 0.199 | 1135 |
| 755  | nilutamide            | 13 µM  | MCF7 | -0.644 | -0.072 | 0.195 | 6481 |
| 771  | doxepin               | 13 µM  | MCF7 | -0.644 | -0.132 | 0.134 | 7415 |
| 626  | wortmannin            | 10 nM  | MCF7 | -0.644 | -0.089 | 0.178 | 1668 |
| 715  | zaprinast             | 15 µM  | PC3  | -0.645 | -0.106 | 0.161 | 6749 |
| 688  | chlorogenic acid      | 11 µM  | PC3  | -0.645 | -0.069 | 0.198 | 4024 |
| 670  | atractyloside         | 5 µM   | MCF7 | -0.645 | -0.086 | 0.182 | 3435 |
| 680  | cefamandole           | 8 µM   | PC3  | -0.645 | -0.111 | 0.157 | 3696 |

|     |                             |            |      |        |        |       |      |
|-----|-----------------------------|------------|------|--------|--------|-------|------|
| 766 | Prestwick-1082              | 12 $\mu$ M | MCF7 | -0.646 | -0.084 | 0.183 | 7027 |
| 685 | karakoline                  | 11 $\mu$ M | MCF7 | -0.646 | -0.082 | 0.185 | 3638 |
| 725 | LY-294002                   | 10 $\mu$ M | MCF7 | -0.646 | -0.141 | 0.126 | 5233 |
| 677 | risperidone                 | 10 $\mu$ M | MCF7 | -0.646 | -0.075 | 0.193 | 3508 |
| 630 | droperidol                  | 11 $\mu$ M | HL60 | -0.646 | -0.052 | 0.216 | 1290 |
| 700 | gossypol                    | 8 $\mu$ M  | MCF7 | -0.646 | -0.138 | 0.129 | 4762 |
| 646 | lidoflazine                 | 8 $\mu$ M  | MCF7 | -0.646 | -0.084 | 0.183 | 3201 |
| 649 | diethylstilbestrol          | 15 $\mu$ M | HL60 | -0.646 | -0.086 | 0.181 | 2567 |
| 766 | dihydroergocristine         | 6 $\mu$ M  | MCF7 | -0.647 | -0.069 | 0.199 | 7034 |
| 706 | hydrochlorothiazide         | 13 $\mu$ M | MCF7 | -0.648 | -0.089 | 0.18  | 4970 |
| 685 | phenformin                  | 17 $\mu$ M | MCF7 | -0.648 | -0.101 | 0.167 | 3622 |
| 771 | chenodeoxycholic acid       | 10 $\mu$ M | MCF7 | -0.648 | -0.103 | 0.165 | 7433 |
| 736 | nomegestrol                 | 11 $\mu$ M | MCF7 | -0.649 | -0.079 | 0.19  | 5461 |
| 751 | etiocholanolone             | 14 $\mu$ M | MCF7 | -0.649 | -0.122 | 0.146 | 6060 |
| 766 | adiphenine                  | 11 $\mu$ M | MCF7 | -0.649 | -0.064 | 0.205 | 7037 |
| 728 | securinine                  | 18 $\mu$ M | PC3  | -0.65  | -0.102 | 0.167 | 4493 |
| 712 | guanabenz                   | 14 $\mu$ M | PC3  | -0.65  | -0.066 | 0.203 | 4642 |
| 741 | netilmicin                  | 3 $\mu$ M  | MCF7 | -0.65  | -0.082 | 0.187 | 6005 |
| 686 | benfotiamine                | 9 $\mu$ M  | MCF7 | -0.65  | -0.102 | 0.167 | 3837 |
| 644 | emetine                     | 7 $\mu$ M  | HL60 | -0.651 | -0.117 | 0.152 | 2145 |
| 705 | diphemanil metilsulfate     | 10 $\mu$ M | MCF7 | -0.651 | -0.099 | 0.171 | 4416 |
| 735 | vigabatrin                  | 31 $\mu$ M | MCF7 | -0.651 | -0.052 | 0.217 | 5415 |
| 629 | diprophylline               | 16 $\mu$ M | HL60 | -0.652 | -0.067 | 0.203 | 1853 |
| 755 | timolol                     | 9 $\mu$ M  | MCF7 | -0.652 | -0.096 | 0.174 | 6483 |
| 688 | benzathine benzylpenicillin | 4 $\mu$ M  | PC3  | -0.652 | -0.087 | 0.182 | 4022 |
| 751 | chlorcyclizine              | 12 $\mu$ M | MCF7 | -0.652 | -0.095 | 0.175 | 6053 |
| 685 | etiocholanolone             | 14 $\mu$ M | MCF7 | -0.653 | -0.076 | 0.194 | 3639 |
| 645 | methylbenzethonium chloride | 9 $\mu$ M  | HL60 | -0.653 | -0.099 | 0.171 | 2190 |
| 649 | sulfadimethoxine            | 13 $\mu$ M | HL60 | -0.653 | -0.048 | 0.223 | 2578 |
| 698 | monensin                    | 6 $\mu$ M  | PC3  | -0.654 | -0.153 | 0.118 | 7402 |
| 59  | oligomycin                  | 1 $\mu$ M  | MCF7 | -0.654 | -0.141 | 0.13  | 442  |
| 686 | famprofazone                | 11 $\mu$ M | MCF7 | -0.654 | -0.141 | 0.129 | 3834 |
| 750 | trichostatin A              | 100 nM     | HL60 | -0.654 | -0.14  | 0.131 | 6171 |
| 712 | domperidone                 | 7 $\mu$ M  | PC3  | -0.654 | -0.113 | 0.158 | 4640 |
| 704 | terconazole                 | 8 $\mu$ M  | PC3  | -0.654 | -0.087 | 0.184 | 4583 |
| 676 | etilefrine                  | 18 $\mu$ M | MCF7 | -0.654 | -0.107 | 0.164 | 7350 |
| 756 | Prestwick-983               | 17 $\mu$ M | MCF7 | -0.655 | -0.136 | 0.134 | 6520 |

|      |                       |        |        |        |        |       |      |
|------|-----------------------|--------|--------|--------|--------|-------|------|
| 641  | isocorydine           | 12 µM  | HL60   | -0.655 | -0.086 | 0.185 | 1787 |
| 657  | ajmaline              | 12 µM  | MCF7   | -0.655 | -0.072 | 0.199 | 2899 |
| 750  | LY-294002             | 10 µM  | HL60   | -0.655 | -0.138 | 0.133 | 6198 |
| 690  | sulmazole             | 14 µM  | MCF7   | -0.655 | -0.069 | 0.202 | 4127 |
| 741  | pivmecillinam         | 8 µM   | MCF7   | -0.655 | -0.138 | 0.134 | 6014 |
| 654  | bacampicillin         | 8 µM   | MCF7   | -0.656 | -0.056 | 0.215 | 3273 |
| 698  | trimethoprim          | 14 µM  | PC3    | -0.656 | -0.084 | 0.187 | 7377 |
| 659  | felbinac              | 19 µM  | HL60   | -0.656 | -0.101 | 0.171 | 3061 |
| 628  | hydroflumethiazide    | 12 µM  | PC3    | -0.656 | -0.07  | 0.202 | 1809 |
| 678  | tropine               | 28 µM  | MCF7   | -0.657 | -0.071 | 0.201 | 3569 |
| 31   | 2-deoxy-D-glucose     | 10 mM  | MCF7   | -0.657 | -0.094 | 0.178 | 344  |
| 648  | pheneticillin         | 10 µM  | HL60   | -0.657 | -0.059 | 0.213 | 2542 |
| 655  | methoxsalen           | 19 µM  | MCF7   | -0.657 | -0.097 | 0.176 | 3302 |
| 38   | raloxifene            | 100 nM | ssMCF7 | -0.658 | -0.086 | 0.186 | 376  |
| 655  | neostigmine bromide   | 13 µM  | MCF7   | -0.658 | -0.141 | 0.131 | 3294 |
| 705  | etilefrine            | 18 µM  | MCF7   | -0.658 | -0.08  | 0.192 | 4415 |
| 706  | khellin               | 15 µM  | MCF7   | -0.658 | -0.081 | 0.191 | 4987 |
| 726  | aciclovir             | 18 µM  | MCF7   | -0.658 | -0.151 | 0.122 | 5278 |
| 730  | xamoterol             | 5 µM   | MCF7   | -0.658 | -0.065 | 0.207 | 5363 |
| 673  | primidone             | 18 µM  | MCF7   | -0.659 | -0.095 | 0.178 | 3402 |
| 663  | Prestwick-692         | 7 µM   | MCF7   | -0.659 | -0.098 | 0.175 | 2820 |
| 1083 | meteneprost           | 10 µM  | PC3    | -0.659 | -0.065 | 0.208 | 7504 |
| 650  | LY-294002             | 10 µM  | HL60   | -0.659 | -0.122 | 0.151 | 2699 |
| 755  | prasterone            | 12 µM  | MCF7   | -0.66  | -0.107 | 0.166 | 6474 |
| 744  | ampyrone              | 20 µM  | MCF7   | -0.66  | -0.13  | 0.143 | 6845 |
| 755  | estrone               | 15 µM  | MCF7   | -0.66  | -0.068 | 0.205 | 6448 |
| 651  | bergenin              | 12 µM  | HL60   | -0.66  | -0.063 | 0.211 | 2726 |
| 648  | benzethonium chloride | 9 µM   | HL60   | -0.661 | -0.119 | 0.154 | 2508 |
| 661  | Prestwick-983         | 17 µM  | HL60   | -0.661 | -0.13  | 0.144 | 3141 |
| 502  | rottlerin             | 10 µM  | MCF7   | -0.661 | -0.132 | 0.142 | 941  |
| 661  | isometheptene         | 8 µM   | HL60   | -0.661 | -0.081 | 0.193 | 3145 |
| 761  | naftifine             | 12 µM  | PC3    | -0.661 | -0.098 | 0.176 | 7273 |
| 1014 | PF-00539745-00        | 10 µM  | MCF7   | -0.662 | -0.092 | 0.182 | 5974 |
| 502  | 5255229               | 13 µM  | MCF7   | -0.662 | -0.121 | 0.153 | 949  |
| 713  | cephaeline            | 6 µM   | PC3    | -0.662 | -0.088 | 0.186 | 4651 |
| 758  | clofazimine           | 8 µM   | MCF7   | -0.662 | -0.083 | 0.191 | 5642 |
| 744  | sulfanilamide         | 23 µM  | MCF7   | -0.662 | -0.079 | 0.195 | 6810 |

|      |                          |       |      |        |        |       |      |
|------|--------------------------|-------|------|--------|--------|-------|------|
| 655  | fluoxetine               | 12 µM | MCF7 | -0.663 | -0.156 | 0.118 | 3314 |
| 745  | tetrahydroalstonine      | 11 µM | MCF7 | -0.663 | -0.093 | 0.181 | 6209 |
| 619  | clemastine               | 9 µM  | HL60 | -0.663 | -0.111 | 0.163 | 2412 |
| 647  | vanoxerine               | 8 µM  | MCF7 | -0.664 | -0.126 | 0.149 | 3240 |
| 771  | econazole                | 9 µM  | MCF7 | -0.664 | -0.105 | 0.17  | 7427 |
| 689  | trimethobenzamide        | 9 µM  | PC3  | -0.664 | -0.091 | 0.184 | 4100 |
| 744  | clidinium bromide        | 9 µM  | MCF7 | -0.664 | -0.107 | 0.168 | 6837 |
| 729  | puromycin                | 7 µM  | MCF7 | -0.665 | -0.121 | 0.155 | 5310 |
| 504  | 5211181                  | 12 µM | MCF7 | -0.665 | -0.116 | 0.159 | 834  |
| 691  | L-methionine sulfoximine | 22 µM | MCF7 | -0.665 | -0.084 | 0.191 | 4151 |
| 663  | co-dergocrine mesilate   | 6 µM  | MCF7 | -0.666 | -0.131 | 0.145 | 2793 |
| 707  | (+)-isoprenaline         | 11 µM | MCF7 | -0.666 | -0.085 | 0.19  | 5009 |
| 676  | oxamniquine              | 14 µM | MCF7 | -0.666 | -0.073 | 0.203 | 7344 |
| 602  | tanespimycin             | 1 µM  | HL60 | -0.666 | -0.131 | 0.145 | 1166 |
| 636  | pindolol                 | 16 µM | MCF7 | -0.666 | -0.12  | 0.155 | 2238 |
| 728  | altizide                 | 10 µM | PC3  | -0.666 | -0.137 | 0.139 | 4491 |
| 753  | arecoline                | 17 µM | PC3  | -0.667 | -0.088 | 0.188 | 6322 |
| 655  | cefotiam                 | 7 µM  | MCF7 | -0.667 | -0.139 | 0.137 | 3319 |
| 676  | sotalol                  | 13 µM | MCF7 | -0.667 | -0.085 | 0.191 | 7338 |
| 653  | hesperidin               | 7 µM  | MCF7 | -0.667 | -0.127 | 0.149 | 2648 |
| 676  | gabexate                 | 10 µM | MCF7 | -0.667 | -0.123 | 0.154 | 7357 |
| 750  | geldanamycin             | 1 µM  | HL60 | -0.668 | -0.141 | 0.136 | 6187 |
| 632  | cimetidine               | 16 µM | MCF7 | -0.668 | -0.046 | 0.231 | 1464 |
| 504  | 5224221                  | 12 µM | MCF7 | -0.668 | -0.127 | 0.15  | 839  |
| 661  | ribavirin                | 16 µM | HL60 | -0.668 | -0.135 | 0.142 | 3142 |
| 729  | loxapine                 | 9 µM  | MCF7 | -0.668 | -0.104 | 0.172 | 5293 |
| 681  | gossypol                 | 8 µM  | PC3  | -0.668 | -0.114 | 0.163 | 3740 |
| 730  | cefotiam                 | 7 µM  | MCF7 | -0.669 | -0.074 | 0.203 | 5361 |
| 735  | nitrendipine             | 11 µM | MCF7 | -0.669 | -0.087 | 0.19  | 5405 |
| 654  | N-acetylmuramic acid     | 14 µM | MCF7 | -0.67  | -0.078 | 0.199 | 3262 |
| 1067 | SB-202190                | 1 µM  | PC3  | -0.67  | -0.05  | 0.227 | 7058 |
| 648  | nadide                   | 6 µM  | HL60 | -0.67  | -0.087 | 0.19  | 2529 |
| 630  | anisomycin               | 15 µM | HL60 | -0.671 | -0.052 | 0.226 | 1304 |
| 504  | wortmannin               | 1 µM  | MCF7 | -0.671 | -0.146 | 0.132 | 869  |
| 705  | bacampicillin            | 8 µM  | MCF7 | -0.672 | -0.126 | 0.152 | 4417 |
| 705  | Prestwick-642            | 14 µM | MCF7 | -0.672 | -0.099 | 0.179 | 4419 |
| 747  | doxycycline              | 8 µM  | MCF7 | -0.673 | -0.06  | 0.218 | 7195 |

|      |                   |        |      |        |        |       |      |
|------|-------------------|--------|------|--------|--------|-------|------|
| 767  | troglitazone      | 10 µM  | MCF7 | -0.673 | -0.148 | 0.131 | 6949 |
| 699  | isocarboxazid     | 17 µM  | MCF7 | -0.673 | -0.094 | 0.184 | 4706 |
| 746  | hydroquinine      | 9 µM   | MCF7 | -0.673 | -0.063 | 0.216 | 6263 |
| 670  | cloperastine      | 11 µM  | MCF7 | -0.673 | -0.122 | 0.157 | 3408 |
| 654  | metrizamide       | 5 µM   | MCF7 | -0.673 | -0.102 | 0.176 | 3255 |
| 754  | Prestwick-1083    | 9 µM   | PC3  | -0.673 | -0.104 | 0.174 | 6357 |
| 649  | guanadrel         | 8 µM   | HL60 | -0.673 | -0.09  | 0.189 | 2575 |
| 707  | maprotiline       | 13 µM  | MCF7 | -0.674 | -0.134 | 0.145 | 5022 |
| 673  | propranolol       | 14 µM  | MCF7 | -0.674 | -0.109 | 0.17  | 3396 |
| 700  | diphenylpyraline  | 13 µM  | MCF7 | -0.674 | -0.105 | 0.175 | 4765 |
| 735  | amphotericin B    | 4 µM   | MCF7 | -0.674 | -0.145 | 0.134 | 5404 |
| 676  | epitiostanol      | 13 µM  | MCF7 | -0.675 | -0.11  | 0.17  | 7342 |
| 628  | adiphenine        | 11 µM  | PC3  | -0.676 | -0.079 | 0.201 | 1831 |
| 632  | idoxuridine       | 11 µM  | MCF7 | -0.677 | -0.115 | 0.165 | 1480 |
| 602  | clozapine         | 10 µM  | HL60 | -0.677 | -0.071 | 0.209 | 1170 |
| 644  | sulfabenzamide    | 14 µM  | HL60 | -0.677 | -0.068 | 0.213 | 2159 |
| 680  | atractyloside     | 5 µM   | PC3  | -0.677 | -0.133 | 0.147 | 3695 |
| 747  | folic acid        | 9 µM   | MCF7 | -0.678 | -0.108 | 0.172 | 7201 |
| 719  | bethanechol       | 20 µM  | PC3  | -0.678 | -0.096 | 0.185 | 5114 |
| 665  | netilmicin        | 3 µM   | HL60 | -0.679 | -0.084 | 0.197 | 2963 |
| 661  | bacitracin        | 3 µM   | HL60 | -0.68  | -0.108 | 0.173 | 3109 |
| 644  | hydroxyachillin   | 14 µM  | HL60 | -0.68  | -0.093 | 0.189 | 2157 |
| 730  | bisoprolol        | 9 µM   | MCF7 | -0.68  | -0.049 | 0.232 | 5348 |
| 766  | meclofenamic acid | 12 µM  | MCF7 | -0.68  | -0.057 | 0.225 | 7038 |
| 735  | prazosin          | 10 µM  | MCF7 | -0.68  | -0.087 | 0.195 | 5416 |
| 642  | fenbufen          | 16 µM  | MCF7 | -0.68  | -0.12  | 0.161 | 2308 |
| 659  | trichostatin A    | 100 nM | HL60 | -0.681 | -0.142 | 0.14  | 3058 |
| 1095 | vinblastine       | 100 nM | PC3  | -0.681 | -0.109 | 0.173 | 7556 |
| 506  | LY-294002         | 100 nM | MCF7 | -0.681 | -0.081 | 0.201 | 996  |
| 1000 | valinomycin       | 100 nM | MCF7 | -0.681 | -0.11  | 0.172 | 5906 |
| 623  | enoxacin          | 12 µM  | HL60 | -0.681 | -0.09  | 0.192 | 1597 |
| 67   | calmidazolium     | 5 µM   | MCF7 | -0.681 | -0.158 | 0.124 | 486  |
| 737  | dapsone           | 16 µM  | MCF7 | -0.681 | -0.089 | 0.193 | 5498 |
| 730  | pilocarpine       | 15 µM  | MCF7 | -0.682 | -0.075 | 0.207 | 5341 |
| 694  | amantadine        | 10 µM  | MCF7 | -0.682 | -0.053 | 0.229 | 4806 |
| 708  | vanoxerine        | 8 µM   | MCF7 | -0.682 | -0.109 | 0.173 | 5702 |
| 688  | trihexyphenidyl   | 12 µM  | PC3  | -0.682 | -0.124 | 0.159 | 4015 |

|      |                    |        |      |        |        |       |      |
|------|--------------------|--------|------|--------|--------|-------|------|
| 629  | heptaminol         | 22 µM  | HL60 | -0.683 | -0.065 | 0.217 | 1866 |
| 1091 | fulvestrant        | 1 µM   | PC3  | -0.683 | -0.109 | 0.174 | 7539 |
| 735  | melatonin          | 17 µM  | MCF7 | -0.684 | -0.123 | 0.16  | 5393 |
| 698  | sulfadimethoxine   | 13 µM  | PC3  | -0.684 | -0.078 | 0.205 | 7400 |
| 648  | cefmetazole        | 8 µM   | HL60 | -0.685 | -0.09  | 0.193 | 2524 |
| 771  | dyclonine          | 12 µM  | MCF7 | -0.685 | -0.094 | 0.189 | 7423 |
| 513  | genistein          | 10 µM  | MCF7 | -0.685 | -0.101 | 0.183 | 1073 |
| 771  | dropropizine       | 17 µM  | MCF7 | -0.685 | -0.097 | 0.187 | 7429 |
| 665  | levopropoxyphene   | 7 µM   | HL60 | -0.685 | -0.046 | 0.238 | 2980 |
| 513  | valproic acid      | 500 µM | MCF7 | -0.685 | -0.136 | 0.147 | 1078 |
| 505  | carbamazepine      | 100 nM | MCF7 | -0.686 | -0.097 | 0.187 | 919  |
| 655  | ceforanide         | 8 µM   | MCF7 | -0.686 | -0.114 | 0.17  | 3309 |
| 626  | haloperidol        | 10 µM  | MCF7 | -0.687 | -0.139 | 0.145 | 1669 |
| 662  | quipazine          | 9 µM   | MCF7 | -0.687 | -0.067 | 0.218 | 2782 |
| 691  | amylocaine         | 15 µM  | MCF7 | -0.688 | -0.072 | 0.213 | 4169 |
| 632  | phenazone          | 21 µM  | MCF7 | -0.688 | -0.108 | 0.177 | 1489 |
| 743  | tetryzoline        | 17 µM  | MCF7 | -0.688 | -0.094 | 0.191 | 6769 |
| 660  | florfenicol        | 11 µM  | HL60 | -0.688 | -0.103 | 0.182 | 3083 |
| 514  | tyrphostin AG-1478 | 32 µM  | MCF7 | -0.688 | -0.149 | 0.136 | 1141 |
| 720  | CP-320650-01       | 10 µM  | MCF7 | -0.688 | -0.145 | 0.14  | 4379 |
| 694  | colistin           | 3 µM   | MCF7 | -0.688 | -0.1   | 0.184 | 4796 |
| 757  | estradiol          | 100 nM | MCF7 | -0.688 | -0.083 | 0.202 | 5568 |
| 751  | finasteride        | 11 µM  | MCF7 | -0.688 | -0.115 | 0.17  | 6062 |
| 645  | finasteride        | 11 µM  | HL60 | -0.688 | -0.1   | 0.185 | 2206 |
| 720  | CP-320650-01       | 1 µM   | MCF7 | -0.688 | -0.089 | 0.196 | 4382 |
| 630  | ritodrine          | 12 µM  | HL60 | -0.689 | -0.07  | 0.215 | 1280 |
| 709  | lasalocid          | 7 µM   | PC3  | -0.689 | -0.162 | 0.123 | 6639 |
| 1087 | IC-86621           | 1 µM   | PC3  | -0.689 | -0.11  | 0.175 | 7518 |
| 764  | pyrithyldione      | 24 µM  | PC3  | -0.689 | -0.056 | 0.23  | 7153 |
| 703  | diethylstilbestrol | 15 µM  | PC3  | -0.69  | -0.097 | 0.189 | 4547 |
| 741  | pentoxifylline     | 14 µM  | MCF7 | -0.69  | -0.065 | 0.22  | 6021 |
| 752  | sulfapyridine      | 16 µM  | MCF7 | -0.69  | -0.119 | 0.167 | 6101 |
| 758  | serotonin          | 19 µM  | MCF7 | -0.69  | -0.107 | 0.179 | 5633 |
| 704  | vancomycin         | 3 µM   | PC3  | -0.691 | -0.097 | 0.189 | 4598 |
| 631  | cefixime           | 9 µM   | HL60 | -0.691 | -0.099 | 0.188 | 1310 |
| 626  | LY-294002          | 10 µM  | MCF7 | -0.692 | -0.102 | 0.185 | 1664 |
| 761  | articaine          | 12 µM  | PC3  | -0.693 | -0.079 | 0.208 | 7272 |

|      |                                   |        |      |        |        |       |      |
|------|-----------------------------------|--------|------|--------|--------|-------|------|
| 712  | iohexol                           | 5 µM   | PC3  | -0.693 | -0.091 | 0.196 | 4643 |
| 694  | pregnenolone                      | 13 µM  | MCF7 | -0.693 | -0.081 | 0.206 | 4802 |
| 694  | tolnaftate                        | 13 µM  | MCF7 | -0.694 | -0.076 | 0.211 | 4805 |
| 654  | lactobionic acid                  | 11 µM  | MCF7 | -0.694 | -0.068 | 0.219 | 3246 |
| 729  | profenamine                       | 11 µM  | MCF7 | -0.694 | -0.083 | 0.204 | 5296 |
| 648  | propidium iodide                  | 6 µM   | HL60 | -0.694 | -0.08  | 0.208 | 2541 |
| 655  | puromycin                         | 7 µM   | MCF7 | -0.695 | -0.169 | 0.118 | 3310 |
| 632  | khellin                           | 15 µM  | MCF7 | -0.695 | -0.104 | 0.184 | 1504 |
| 632  | ticlopidine                       | 13 µM  | MCF7 | -0.695 | -0.08  | 0.208 | 1475 |
| 744  | estropipate                       | 9 µM   | MCF7 | -0.695 | -0.108 | 0.18  | 6808 |
| 665  | betulin                           | 9 µM   | HL60 | -0.695 | -0.058 | 0.23  | 2952 |
| 712  | felbinac                          | 19 µM  | PC3  | -0.696 | -0.122 | 0.166 | 4639 |
| 649  | trichostatin A                    | 100 nM | HL60 | -0.697 | -0.135 | 0.153 | 2566 |
| 726  | clozapine                         | 12 µM  | MCF7 | -0.697 | -0.141 | 0.147 | 5265 |
| 707  | lisuride                          | 12 µM  | MCF7 | -0.697 | -0.083 | 0.205 | 5028 |
| 654  | pepstatin                         | 6 µM   | MCF7 | -0.697 | -0.064 | 0.225 | 3264 |
| 747  | podophyllotoxin                   | 10 µM  | MCF7 | -0.698 | -0.094 | 0.195 | 7198 |
| 619  | homochlorcyclizine                | 10 µM  | HL60 | -0.698 | -0.101 | 0.188 | 2386 |
| 631  | levothyroxine sodium              | 5 µM   | HL60 | -0.698 | -0.09  | 0.199 | 1312 |
| 685  | ketoprofen                        | 16 µM  | MCF7 | -0.698 | -0.151 | 0.138 | 3626 |
| 741  | lansoprazole                      | 11 µM  | MCF7 | -0.698 | -0.107 | 0.182 | 6009 |
| 662  | noscapine                         | 10 µM  | MCF7 | -0.698 | -0.09  | 0.199 | 2745 |
| 748  | bambuterol                        | 10 µM  | MCF7 | -0.698 | -0.082 | 0.207 | 7239 |
| 602  | thioridazine                      | 10 µM  | HL60 | -0.699 | -0.13  | 0.159 | 1171 |
| 1093 | 16-phenyltetranorprostaglandin E2 | 10 µM  | PC3  | -0.699 | -0.133 | 0.156 | 7546 |
| 758  | biperiden                         | 11 µM  | MCF7 | -0.699 | -0.098 | 0.191 | 5644 |
| 513  | haloperidol                       | 10 µM  | MCF7 | -0.699 | -0.047 | 0.243 | 1082 |
| 735  | arecoline                         | 17 µM  | MCF7 | -0.7   | -0.1   | 0.19  | 5423 |
| 755  | etynodiol                         | 10 µM  | MCF7 | -0.701 | -0.089 | 0.201 | 6479 |
| 602  | LY-294002                         | 10 µM  | HL60 | -0.701 | -0.137 | 0.153 | 1180 |
| 628  | betazole                          | 27 µM  | PC3  | -0.701 | -0.082 | 0.208 | 1812 |
| 655  | melatonin                         | 17 µM  | MCF7 | -0.701 | -0.131 | 0.159 | 3293 |
| 662  | cinchonidine                      | 14 µM  | MCF7 | -0.701 | -0.097 | 0.193 | 2772 |
| 633  | ampicillin                        | 10 µM  | MCF7 | -0.701 | -0.101 | 0.19  | 1530 |
| 735  | metolazone                        | 11 µM  | MCF7 | -0.701 | -0.07  | 0.22  | 5392 |
| 602  | LY-294002                         | 10 µM  | HL60 | -0.701 | -0.15  | 0.14  | 1177 |
| 602  | estradiol                         | 10 nM  | HL60 | -0.702 | -0.123 | 0.167 | 1182 |



|      |                   |        |      |        |        |       |      |
|------|-------------------|--------|------|--------|--------|-------|------|
| 706  | cefaclor          | 10 µM  | MCF7 | -0.702 | -0.069 | 0.221 | 4967 |
| 634  | dinoprost         | 8 µM   | HL60 | -0.702 | -0.137 | 0.154 | 2446 |
| 659  | primidone         | 18 µM  | HL60 | -0.702 | -0.106 | 0.184 | 3065 |
| 729  | naftidrofuryl     | 8 µM   | MCF7 | -0.702 | -0.078 | 0.213 | 5287 |
| 688  | gramine           | 23 µM  | PC3  | -0.703 | -0.129 | 0.162 | 3999 |
| 707  | benzbromarone     | 9 µM   | MCF7 | -0.703 | -0.116 | 0.175 | 5015 |
| 660  | megestrol         | 10 µM  | HL60 | -0.704 | -0.121 | 0.171 | 3091 |
| 631  | meclocycline      | 6 µM   | HL60 | -0.704 | -0.075 | 0.217 | 1341 |
| 658  | iocetamic acid    | 7 µM   | HL60 | -0.704 | -0.09  | 0.201 | 3022 |
| 632  | thioridazine      | 10 µM  | MCF7 | -0.704 | -0.132 | 0.159 | 1486 |
| 1033 | dinoprostone      | 10 µM  | MCF7 | -0.705 | -0.083 | 0.209 | 6552 |
| 505  | wortmannin        | 10 nM  | MCF7 | -0.705 | -0.115 | 0.177 | 911  |
| 647  | maprotiline       | 13 µM  | MCF7 | -0.706 | -0.128 | 0.164 | 3236 |
| 1055 | SB-203580         | 1 µM   | MCF7 | -0.706 | -0.096 | 0.196 | 6899 |
| 757  | alvespimycin      | 100 nM | MCF7 | -0.706 | -0.151 | 0.141 | 5573 |
| 691  | alprostadil       | 11 µM  | MCF7 | -0.706 | -0.135 | 0.157 | 4179 |
| 1010 | tanespimycin      | 1 µM   | MCF7 | -0.706 | -0.142 | 0.151 | 5953 |
| 649  | alexidine         | 7 µM   | HL60 | -0.706 | -0.09  | 0.202 | 2576 |
| 654  | myricetin         | 13 µM  | MCF7 | -0.706 | -0.068 | 0.225 | 3270 |
| 631  | carbarsone        | 15 µM  | HL60 | -0.708 | -0.068 | 0.225 | 1313 |
| 647  | chlormezanone     | 15 µM  | MCF7 | -0.708 | -0.1   | 0.193 | 3235 |
| 673  | eticlopride       | 11 µM  | MCF7 | -0.709 | -0.075 | 0.219 | 3393 |
| 745  | cytisine          | 21 µM  | MCF7 | -0.709 | -0.115 | 0.179 | 6217 |
| 702  | ethisterone       | 13 µM  | PC3  | -0.709 | -0.17  | 0.123 | 4340 |
| 629  | amitriptyline     | 13 µM  | HL60 | -0.71  | -0.103 | 0.191 | 1865 |
| 629  | isoflupredone     | 10 µM  | HL60 | -0.71  | -0.055 | 0.239 | 1873 |
| 632  | trimethobenzamide | 9 µM   | MCF7 | -0.71  | -0.073 | 0.221 | 1502 |
| 737  | isometheptene     | 8 µM   | MCF7 | -0.71  | -0.107 | 0.187 | 5502 |
| 704  | beclometasone     | 8 µM   | PC3  | -0.71  | -0.096 | 0.197 | 4580 |
| 665  | quinpirole        | 16 µM  | HL60 | -0.711 | -0.093 | 0.201 | 2977 |
| 728  | iopromide         | 5 µM   | PC3  | -0.711 | -0.096 | 0.198 | 4504 |
| 761  | azapropazone      | 13 µM  | PC3  | -0.712 | -0.094 | 0.201 | 7277 |
| 767  | haloperidol       | 10 µM  | MCF7 | -0.712 | -0.11  | 0.185 | 6960 |
| 673  | digoxigenin       | 10 µM  | MCF7 | -0.712 | -0.077 | 0.218 | 3397 |
| 670  | guanadrel         | 8 µM   | MCF7 | -0.712 | -0.137 | 0.158 | 3438 |
| 772  | mefexamide        | 13 µM  | MCF7 | -0.712 | -0.088 | 0.207 | 7478 |
| 705  | dicycloverine     | 12 µM  | MCF7 | -0.712 | -0.09  | 0.205 | 4405 |

|     |                           |       |      |        |        |       |      |
|-----|---------------------------|-------|------|--------|--------|-------|------|
| 765 | fluphenazine              | 10 µM | MCF7 | -0.712 | -0.114 | 0.181 | 6996 |
| 655 | dicloxacillin             | 8 µM  | MCF7 | -0.713 | -0.137 | 0.158 | 3307 |
| 761 | disopyramide              | 12 µM | PC3  | -0.713 | -0.089 | 0.206 | 7276 |
| 651 | cicloheximide             | 14 µM | HL60 | -0.713 | -0.128 | 0.167 | 2723 |
| 771 | prednisolone              | 11 µM | MCF7 | -0.713 | -0.094 | 0.202 | 7424 |
| 747 | ursolic acid              | 9 µM  | MCF7 | -0.714 | -0.112 | 0.183 | 7181 |
| 761 | adiphenine                | 11 µM | PC3  | -0.715 | -0.079 | 0.217 | 7279 |
| 735 | pralidoxime               | 23 µM | MCF7 | -0.715 | -0.126 | 0.17  | 5383 |
| 665 | tribenoside               | 8 µM  | HL60 | -0.715 | -0.109 | 0.187 | 2946 |
| 753 | 2-aminobenzenesulfonamide | 23 µM | PC3  | -0.716 | -0.083 | 0.213 | 6321 |
| 647 | metitepine                | 8 µM  | MCF7 | -0.716 | -0.164 | 0.132 | 3231 |
| 745 | disulfiram                | 13 µM | MCF7 | -0.716 | -0.15  | 0.146 | 6210 |
| 751 | myosmine                  | 27 µM | MCF7 | -0.717 | -0.089 | 0.208 | 6055 |
| 708 | guanabenz                 | 14 µM | MCF7 | -0.718 | -0.115 | 0.182 | 5703 |
| 727 | estradiol                 | 10 nM | PC3  | -0.718 | -0.105 | 0.192 | 4465 |
| 699 | griseofulvin              | 11 µM | MCF7 | -0.719 | -0.152 | 0.146 | 4687 |
| 771 | isotretinoin              | 13 µM | MCF7 | -0.72  | -0.146 | 0.152 | 7438 |
| 753 | hexetidine                | 12 µM | PC3  | -0.72  | -0.123 | 0.175 | 6319 |
| 650 | estradiol                 | 10 nM | HL60 | -0.72  | -0.101 | 0.197 | 2701 |
| 747 | iopamidol                 | 5 µM  | MCF7 | -0.72  | -0.061 | 0.237 | 7189 |
| 764 | propoxycaïne              | 12 µM | PC3  | -0.721 | -0.088 | 0.211 | 7155 |
| 504 | pyrvinium                 | 1 µM  | MCF7 | -0.721 | -0.156 | 0.142 | 870  |
| 633 | verapamil                 | 8 µM  | MCF7 | -0.721 | -0.131 | 0.168 | 1509 |
| 513 | estradiol                 | 10 nM | MCF7 | -0.722 | -0.086 | 0.212 | 1079 |
| 602 | genistein                 | 10 µM | HL60 | -0.722 | -0.104 | 0.194 | 1176 |
| 628 | isoflupredone             | 10 µM | PC3  | -0.723 | -0.06  | 0.239 | 1832 |
| 665 | ozagrel                   | 15 µM | HL60 | -0.723 | -0.055 | 0.244 | 2942 |
| 671 | pyrithyldione             | 24 µM | MCF7 | -0.723 | -0.095 | 0.204 | 3482 |
| 628 | amitriptyline             | 13 µM | PC3  | -0.723 | -0.104 | 0.195 | 1823 |
| 720 | PHA-00745360              | 1 µM  | MCF7 | -0.723 | -0.108 | 0.191 | 4384 |
| 676 | fluticasone               | 8 µM  | MCF7 | -0.723 | -0.09  | 0.209 | 7348 |
| 699 | levomepromazine           | 9 µM  | MCF7 | -0.723 | -0.126 | 0.173 | 4723 |
| 653 | suloctidil                | 12 µM | MCF7 | -0.724 | -0.139 | 0.161 | 2651 |
| 690 | cinchonine                | 14 µM | MCF7 | -0.724 | -0.086 | 0.214 | 4107 |
| 645 | lycorine                  | 12 µM | HL60 | -0.724 | -0.102 | 0.198 | 2195 |
| 737 | loracarbef                | 11 µM | MCF7 | -0.724 | -0.101 | 0.199 | 5492 |
| 691 | myricetin                 | 13 µM | MCF7 | -0.724 | -0.113 | 0.187 | 4170 |

|      |                    |       |        |        |        |       |      |
|------|--------------------|-------|--------|--------|--------|-------|------|
| 687  | alpha-ergocryptine | 7 µM  | MCF7   | -0.724 | -0.099 | 0.201 | 3900 |
| 720  | diethylstilbestrol | 15 µM | MCF7   | -0.725 | -0.137 | 0.163 | 4369 |
| 634  | hexetidine         | 12 µM | HL60   | -0.725 | -0.084 | 0.216 | 2457 |
| 767  | clozapine          | 10 µM | MCF7   | -0.726 | -0.14  | 0.16  | 6947 |
| 745  | dienestrol         | 15 µM | MCF7   | -0.726 | -0.12  | 0.18  | 6208 |
| 636  | mefloquine         | 10 µM | MCF7   | -0.726 | -0.132 | 0.169 | 2210 |
| 707  | brinzolamide       | 10 µM | MCF7   | -0.726 | -0.084 | 0.217 | 5016 |
| 757  | genistein          | 10 µM | MCF7   | -0.726 | -0.112 | 0.188 | 5595 |
| 766  | thiamphenicol      | 11 µM | MCF7   | -0.727 | -0.133 | 0.168 | 7033 |
| 1014 | pioglitazone       | 10 µM | MCF7   | -0.728 | -0.082 | 0.219 | 5972 |
| 661  | flucloxacillin     | 8 µM  | HL60   | -0.728 | -0.105 | 0.196 | 3128 |
| 688  | levobunolol        | 12 µM | PC3    | -0.728 | -0.108 | 0.194 | 4016 |
| 745  | tetracycline       | 8 µM  | MCF7   | -0.73  | -0.101 | 0.201 | 6233 |
| 691  | Prestwick-691      | 14 µM | MCF7   | -0.73  | -0.115 | 0.187 | 4172 |
| 662  | syrosingopine      | 6 µM  | MCF7   | -0.731 | -0.156 | 0.147 | 2753 |
| 648  | streptozocin       | 15 µM | HL60   | -0.731 | -0.05  | 0.253 | 2535 |
| 688  | niclosamide        | 12 µM | PC3    | -0.732 | -0.148 | 0.155 | 4018 |
| 633  | perphenazine       | 10 µM | MCF7   | -0.732 | -0.163 | 0.14  | 1540 |
| 705  | ethionamide        | 24 µM | MCF7   | -0.733 | -0.089 | 0.214 | 4418 |
| 720  | paroxetine         | 1 µM  | MCF7   | -0.733 | -0.121 | 0.182 | 4378 |
| 745  | calycanthine       | 12 µM | MCF7   | -0.733 | -0.082 | 0.221 | 6221 |
| 764  | chlortalidone      | 12 µM | PC3    | -0.733 | -0.074 | 0.229 | 7152 |
| 602  | fulvestrant        | 10 nM | HL60   | -0.735 | -0.104 | 0.2   | 1179 |
| 627  | thiamphenicol      | 11 µM | MCF7   | -0.735 | -0.148 | 0.156 | 1704 |
| 685  | diphenylpyraline   | 13 µM | MCF7   | -0.735 | -0.108 | 0.197 | 3640 |
| 663  | benzocaine         | 24 µM | MCF7   | -0.737 | -0.075 | 0.23  | 2822 |
| 633  | baclofen           | 19 µM | MCF7   | -0.737 | -0.084 | 0.221 | 1536 |
| 632  | tolnaftate         | 13 µM | MCF7   | -0.738 | -0.099 | 0.206 | 1501 |
| 758  | cephaeline         | 6 µM  | MCF7   | -0.739 | -0.076 | 0.23  | 5612 |
| 680  | merbromin          | 5 µM  | PC3    | -0.739 | -0.13  | 0.176 | 3700 |
| 772  | cloxacillin        | 9 µM  | MCF7   | -0.74  | -0.129 | 0.177 | 7483 |
| 719  | metampicillin      | 10 µM | PC3    | -0.74  | -0.119 | 0.187 | 5115 |
| 654  | carteolol          | 12 µM | MCF7   | -0.74  | -0.102 | 0.204 | 3276 |
| 752  | leflunomide        | 15 µM | MCF7   | -0.74  | -0.121 | 0.185 | 6102 |
| 38   | estradiol          | 10 nM | ssMCF7 | -0.74  | -0.138 | 0.168 | 373  |
| 505  | 5186223            | 12 µM | MCF7   | -0.74  | -0.079 | 0.228 | 885  |
| 689  | gelsemine          | 12 µM | PC3    | -0.743 | -0.115 | 0.192 | 4097 |

|      |                         |        |      |        |        |       |      |
|------|-------------------------|--------|------|--------|--------|-------|------|
| 757  | clozapine               | 10 µM  | MCF7 | -0.743 | -0.092 | 0.216 | 5589 |
| 750  | tretinoin               | 1 µM   | HL60 | -0.743 | -0.132 | 0.176 | 6170 |
| 654  | cyanocobalamin          | 3 µM   | MCF7 | -0.743 | -0.103 | 0.205 | 3252 |
| 630  | procainamide            | 15 µM  | HL60 | -0.744 | -0.081 | 0.227 | 1263 |
| 681  | etiocholanolone         | 14 µM  | PC3  | -0.744 | -0.117 | 0.191 | 3742 |
| 505  | 5186324                 | 2 µM   | MCF7 | -0.744 | -0.073 | 0.235 | 900  |
| 653  | fusidic acid            | 7 µM   | MCF7 | -0.744 | -0.113 | 0.195 | 2647 |
| 631  | mebhydrolin             | 5 µM   | HL60 | -0.744 | -0.098 | 0.21  | 1333 |
| 505  | 5149715                 | 10 µM  | MCF7 | -0.744 | -0.075 | 0.233 | 890  |
| 632  | tolazoline              | 20 µM  | MCF7 | -0.744 | -0.115 | 0.193 | 1500 |
| 685  | metoclopramide          | 12 µM  | MCF7 | -0.744 | -0.161 | 0.147 | 3625 |
| 630  | 3-hydroxy-DL-kynurenine | 18 µM  | HL60 | -0.745 | -0.068 | 0.24  | 1300 |
| 626  | sirolimus               | 100 nM | MCF7 | -0.748 | -0.109 | 0.201 | 1667 |
| 772  | triflupromazine         | 10 µM  | MCF7 | -0.748 | -0.162 | 0.148 | 7466 |
| 725  | clozapine               | 10 µM  | MCF7 | -0.749 | -0.114 | 0.196 | 5226 |
| 623  | colchicine              | 10 µM  | HL60 | -0.749 | -0.171 | 0.139 | 1598 |
| 1094 | CP-863187               | 10 µM  | MCF7 | -0.749 | -0.059 | 0.252 | 7553 |
| 657  | clorsulon               | 11 µM  | MCF7 | -0.749 | -0.102 | 0.208 | 2884 |
| 738  | isoflupredone           | 10 µM  | MCF7 | -0.75  | -0.095 | 0.215 | 5545 |
| 735  | nizatidine              | 12 µM  | MCF7 | -0.75  | -0.108 | 0.203 | 5406 |
| 720  | spiradoline             | 1 µM   | MCF7 | -0.75  | -0.097 | 0.214 | 4375 |
| 701  | finasteride             | 11 µM  | PC3  | -0.75  | -0.177 | 0.133 | 4300 |
| 703  | PHA-00745360            | 1 µM   | PC3  | -0.751 | -0.109 | 0.202 | 4562 |
| 686  | mexiletine              | 19 µM  | MCF7 | -0.751 | -0.107 | 0.204 | 3862 |
| 765  | genistein               | 10 µM  | MCF7 | -0.751 | -0.151 | 0.16  | 6994 |
| 678  | oxedrine                | 24 µM  | MCF7 | -0.752 | -0.124 | 0.188 | 3578 |
| 695  | iodixanol               | 3 µM   | MCF7 | -0.752 | -0.102 | 0.209 | 4848 |
| 636  | tetracycline            | 8 µM   | MCF7 | -0.752 | -0.13  | 0.181 | 2243 |
| 649  | alpha-ergocryptine      | 7 µM   | HL60 | -0.753 | -0.107 | 0.205 | 2572 |
| 630  | prochlorperazine        | 7 µM   | HL60 | -0.753 | -0.082 | 0.229 | 1286 |
| 602  | monorden                | 100 nM | HL60 | -0.753 | -0.149 | 0.163 | 1160 |
| 690  | metronidazole           | 23 µM  | MCF7 | -0.754 | -0.112 | 0.2   | 4141 |
| 502  | felodipine              | 10 µM  | MCF7 | -0.755 | -0.112 | 0.2   | 965  |
| 659  | hymecromone             | 23 µM  | HL60 | -0.755 | -0.142 | 0.17  | 3045 |
| 660  | clioquinol              | 13 µM  | HL60 | -0.755 | -0.117 | 0.195 | 3084 |
| 514  | DL-PPMP                 | 2 µM   | MCF7 | -0.755 | -0.077 | 0.236 | 1121 |
| 655  | carbimazole             | 21 µM  | MCF7 | -0.756 | -0.128 | 0.185 | 3299 |

|      |                      |        |      |        |        |       |      |
|------|----------------------|--------|------|--------|--------|-------|------|
| 702  | helveticoside        | 7 µM   | PC3  | -0.756 | -0.119 | 0.194 | 4327 |
| 1078 | thapsigargin         | 100 nM | MCF7 | -0.756 | -0.145 | 0.168 | 7100 |
| 728  | piretanide           | 11 µM  | PC3  | -0.756 | -0.12  | 0.193 | 4490 |
| 761  | viomycin             | 5 µM   | PC3  | -0.758 | -0.104 | 0.209 | 7278 |
| 695  | letrozole            | 14 µM  | MCF7 | -0.758 | -0.068 | 0.246 | 4824 |
| 630  | estradiol            | 15 µM  | HL60 | -0.759 | -0.08  | 0.234 | 1299 |
| 699  | tiapride             | 11 µM  | MCF7 | -0.759 | -0.137 | 0.177 | 4686 |
| 660  | estrone              | 15 µM  | HL60 | -0.759 | -0.137 | 0.177 | 3071 |
| 630  | domperidone          | 7 µM   | HL60 | -0.759 | -0.08  | 0.234 | 1301 |
| 707  | metixene             | 12 µM  | MCF7 | -0.759 | -0.112 | 0.203 | 5018 |
| 690  | trihexyphenidyl      | 12 µM  | MCF7 | -0.759 | -0.101 | 0.214 | 4133 |
| 757  | valproic acid        | 500 µM | MCF7 | -0.76  | -0.142 | 0.172 | 5600 |
| 626  | estradiol            | 10 nM  | MCF7 | -0.76  | -0.069 | 0.245 | 1666 |
| 654  | betulinic acid       | 9 µM   | MCF7 | -0.76  | -0.117 | 0.198 | 3281 |
| 631  | N-acetylmuramic acid | 14 µM  | HL60 | -0.76  | -0.145 | 0.17  | 1326 |
| 735  | carbimazole          | 21 µM  | MCF7 | -0.761 | -0.133 | 0.182 | 5399 |
| 688  | metronidazole        | 23 µM  | PC3  | -0.761 | -0.108 | 0.207 | 4023 |
| 687  | tinidazole           | 16 µM  | MCF7 | -0.762 | -0.096 | 0.22  | 3896 |
| 676  | zalcitabine          | 19 µM  | MCF7 | -0.762 | -0.124 | 0.192 | 7352 |
| 750  | LY-294002            | 10 µM  | HL60 | -0.762 | -0.171 | 0.144 | 6195 |
| 727  | haloperidol          | 10 µM  | PC3  | -0.762 | -0.143 | 0.172 | 4427 |
| 681  | diphenylpyraline     | 13 µM  | PC3  | -0.763 | -0.114 | 0.202 | 3743 |
| 506  | estradiol            | 10 nM  | MCF7 | -0.763 | -0.112 | 0.204 | 1021 |
| 664  | Prestwick-984        | 9 µM   | HL60 | -0.764 | -0.073 | 0.244 | 2903 |
| 655  | iohexol              | 5 µM   | MCF7 | -0.765 | -0.101 | 0.216 | 3322 |
| 650  | monorden             | 100 nM | HL60 | -0.765 | -0.152 | 0.165 | 2679 |
| 636  | tranexamic acid      | 25 µM  | MCF7 | -0.765 | -0.137 | 0.18  | 2248 |
| 719  | sulindac             | 11 µM  | PC3  | -0.765 | -0.092 | 0.224 | 5103 |
| 673  | felbinac             | 19 µM  | MCF7 | -0.765 | -0.098 | 0.219 | 3398 |
| 695  | zuclopenthixol       | 9 µM   | MCF7 | -0.765 | -0.12  | 0.197 | 4843 |
| 707  | bemegride            | 26 µM  | MCF7 | -0.766 | -0.119 | 0.198 | 5014 |
| 699  | guanadrel            | 8 µM   | MCF7 | -0.766 | -0.11  | 0.207 | 4720 |
| 747  | ketotifen            | 9 µM   | MCF7 | -0.767 | -0.091 | 0.227 | 7199 |
| 628  | thiamphenicol        | 11 µM  | PC3  | -0.767 | -0.086 | 0.232 | 1826 |
| 665  | procarbazine         | 16 µM  | HL60 | -0.768 | -0.125 | 0.192 | 2971 |
| 728  | clofilium tosylate   | 8 µM   | PC3  | -0.768 | -0.122 | 0.196 | 4492 |
| 700  | myosmine             | 27 µM  | MCF7 | -0.768 | -0.153 | 0.165 | 4759 |

|      |                             |        |      |        |        |       |      |
|------|-----------------------------|--------|------|--------|--------|-------|------|
| 1011 | valinomycin                 | 100 nM | PC3  | -0.768 | -0.134 | 0.184 | 5962 |
| 663  | yohimbic acid               | 11 µM  | MCF7 | -0.768 | -0.08  | 0.238 | 2803 |
| 650  | LY-294002                   | 10 µM  | HL60 | -0.768 | -0.175 | 0.143 | 2696 |
| 693  | emetine                     | 7 µM   | PC3  | -0.769 | -0.121 | 0.198 | 4243 |
| 772  | ajmaline                    | 12 µM  | MCF7 | -0.769 | -0.119 | 0.2   | 7484 |
| 771  | clemastine                  | 9 µM   | MCF7 | -0.769 | -0.112 | 0.206 | 7443 |
| 676  | benzathine benzylpenicillin | 4 µM   | MCF7 | -0.77  | -0.096 | 0.223 | 7359 |
| 699  | atractyloside               | 5 µM   | MCF7 | -0.771 | -0.126 | 0.193 | 4717 |
| 631  | corticosterone              | 12 µM  | HL60 | -0.772 | -0.08  | 0.24  | 1307 |
| 694  | gabexate                    | 10 µM  | MCF7 | -0.773 | -0.076 | 0.244 | 4804 |
| 771  | diethylcarbamazine          | 10 µM  | MCF7 | -0.774 | -0.058 | 0.262 | 7425 |
| 754  | acemetacin                  | 10 µM  | PC3  | -0.774 | -0.099 | 0.221 | 6361 |
| 1068 | SB-203580                   | 1 µM   | MCF7 | -0.775 | -0.146 | 0.175 | 7061 |
| 627  | heptaminol                  | 22 µM  | MCF7 | -0.775 | -0.098 | 0.223 | 1703 |
| 685  | betonicine                  | 25 µM  | MCF7 | -0.777 | -0.141 | 0.181 | 3642 |
| 691  | betulinic acid              | 9 µM   | MCF7 | -0.777 | -0.111 | 0.211 | 4181 |
| 646  | fendiline                   | 11 µM  | MCF7 | -0.778 | -0.138 | 0.184 | 3190 |
| 705  | 3-acetamidocoumarin         | 20 µM  | MCF7 | -0.779 | -0.125 | 0.197 | 4426 |
| 646  | chlortalidone               | 12 µM  | MCF7 | -0.779 | -0.127 | 0.196 | 3198 |
| 676  | methyl dopate               | 15 µM  | MCF7 | -0.781 | -0.109 | 0.214 | 7360 |
| 663  | emetine                     | 7 µM   | MCF7 | -0.781 | -0.126 | 0.197 | 2801 |
| 690  | fluticasone                 | 8 µM   | MCF7 | -0.781 | -0.159 | 0.165 | 4129 |
| 603  | haloperidol                 | 10 µM  | PC3  | -0.782 | -0.122 | 0.202 | 1244 |
| 720  | PHA-00745360                | 10 µM  | MCF7 | -0.782 | -0.116 | 0.207 | 4381 |
| 663  | succinylsulfathiazole       | 11 µM  | MCF7 | -0.782 | -0.091 | 0.233 | 2821 |
| 691  | furazolidone                | 18 µM  | MCF7 | -0.782 | -0.106 | 0.218 | 4178 |
| 690  | pheniramine                 | 11 µM  | MCF7 | -0.783 | -0.124 | 0.201 | 4130 |
| 731  | (+)-chelidone               | 11 µM  | PC3  | -0.783 | -0.15  | 0.175 | 5760 |
| 764  | aconitine                   | 6 µM   | PC3  | -0.783 | -0.086 | 0.239 | 7149 |
| 628  | heptaminol                  | 22 µM  | PC3  | -0.784 | -0.087 | 0.237 | 1825 |
| 627  | homatropine                 | 11 µM  | MCF7 | -0.785 | -0.075 | 0.249 | 1684 |
| 664  | cyclopenthiiazide           | 11 µM  | HL60 | -0.785 | -0.097 | 0.228 | 2905 |
| 661  | halofantrine                | 7 µM   | HL60 | -0.785 | -0.115 | 0.21  | 3130 |
| 677  | naftifine                   | 12 µM  | MCF7 | -0.786 | -0.148 | 0.178 | 3536 |
| 704  | Prestwick-692               | 7 µM   | PC3  | -0.786 | -0.111 | 0.215 | 4599 |
| 662  | yohimbine                   | 10 µM  | MCF7 | -0.787 | -0.074 | 0.252 | 2755 |
| 691  | co-dergocrine mesilate      | 6 µM   | MCF7 | -0.787 | -0.189 | 0.136 | 4152 |

|     |                    |             |      |        |        |       |      |
|-----|--------------------|-------------|------|--------|--------|-------|------|
| 642 | ethisterone        | 13 $\mu$ M  | MCF7 | -0.787 | -0.149 | 0.177 | 2326 |
| 685 | finasteride        | 11 $\mu$ M  | MCF7 | -0.787 | -0.152 | 0.174 | 3641 |
| 602 | trifluoperazine    | 10 $\mu$ M  | HL60 | -0.787 | -0.153 | 0.173 | 1165 |
| 656 | methoxamine        | 16 $\mu$ M  | MCF7 | -0.788 | -0.143 | 0.183 | 2848 |
| 677 | bethanechol        | 20 $\mu$ M  | MCF7 | -0.788 | -0.105 | 0.221 | 3537 |
| 678 | oxyphenbutazone    | 12 $\mu$ M  | MCF7 | -0.788 | -0.149 | 0.177 | 3582 |
| 699 | cefazolin          | 8 $\mu$ M   | MCF7 | -0.79  | -0.101 | 0.227 | 4708 |
| 767 | rosiglitazone      | 10 $\mu$ M  | MCF7 | -0.794 | -0.137 | 0.192 | 6950 |
| 690 | boldine            | 12 $\mu$ M  | MCF7 | -0.794 | -0.132 | 0.196 | 4122 |
| 729 | ambroxol           | 10 $\mu$ M  | MCF7 | -0.794 | -0.089 | 0.24  | 5319 |
| 691 | tenoxicam          | 12 $\mu$ M  | MCF7 | -0.795 | -0.138 | 0.191 | 4182 |
| 602 | haloperidol        | 10 $\mu$ M  | HL60 | -0.796 | -0.109 | 0.22  | 1185 |
| 754 | norgestrol         | 11 $\mu$ M  | PC3  | -0.796 | -0.147 | 0.183 | 6362 |
| 765 | valproic acid      | 500 $\mu$ M | MCF7 | -0.797 | -0.156 | 0.173 | 6999 |
| 627 | acetoexamide       | 12 $\mu$ M  | MCF7 | -0.797 | -0.132 | 0.198 | 1707 |
| 633 | glipizide          | 9 $\mu$ M   | MCF7 | -0.798 | -0.103 | 0.227 | 1508 |
| 662 | stachydrine        | 22 $\mu$ M  | MCF7 | -0.798 | -0.104 | 0.226 | 2743 |
| 514 | MG-132             | 21 $\mu$ M  | MCF7 | -0.8   | -0.157 | 0.174 | 1140 |
| 707 | bretylium tosilate | 10 $\mu$ M  | MCF7 | -0.8   | -0.121 | 0.21  | 5020 |
| 767 | estradiol          | 10 nM       | MCF7 | -0.8   | -0.117 | 0.214 | 6957 |
| 704 | ciclosporin        | 3 $\mu$ M   | PC3  | -0.8   | -0.132 | 0.199 | 4586 |
| 703 | fenbendazole       | 13 $\mu$ M  | PC3  | -0.801 | -0.165 | 0.167 | 4542 |
| 747 | tetrandrine        | 6 $\mu$ M   | MCF7 | -0.801 | -0.17  | 0.161 | 7178 |
| 662 | convolamine        | 12 $\mu$ M  | MCF7 | -0.801 | -0.081 | 0.25  | 2771 |
| 504 | 5253409            | 17 $\mu$ M  | MCF7 | -0.801 | -0.137 | 0.194 | 844  |
| 699 | sulfadimethoxine   | 13 $\mu$ M  | MCF7 | -0.802 | -0.098 | 0.234 | 4724 |
| 654 | naringenin         | 15 $\mu$ M  | MCF7 | -0.803 | -0.095 | 0.237 | 3278 |
| 504 | tretinoin          | 1 $\mu$ M   | MCF7 | -0.803 | -0.142 | 0.191 | 849  |
| 663 | canadine           | 12 $\mu$ M  | MCF7 | -0.804 | -0.141 | 0.191 | 2818 |
| 655 | hexetidine         | 12 $\mu$ M  | MCF7 | -0.806 | -0.116 | 0.218 | 3318 |
| 685 | lomefloxacin       | 10 $\mu$ M  | MCF7 | -0.807 | -0.127 | 0.207 | 3620 |
| 629 | adiphenine         | 11 $\mu$ M  | HL60 | -0.808 | -0.061 | 0.273 | 1872 |
| 690 | chlorogenic acid   | 11 $\mu$ M  | MCF7 | -0.808 | -0.106 | 0.229 | 4142 |
| 705 | lidocaine          | 15 $\mu$ M  | MCF7 | -0.809 | -0.09  | 0.245 | 4421 |
| 767 | genistein          | 10 $\mu$ M  | MCF7 | -0.812 | -0.143 | 0.194 | 6952 |
| 771 | bumetanide         | 11 $\mu$ M  | MCF7 | -0.812 | -0.074 | 0.262 | 7440 |
| 633 | lisuride           | 12 $\mu$ M  | MCF7 | -0.813 | -0.119 | 0.218 | 1545 |

|      |                       |        |        |        |        |       |      |
|------|-----------------------|--------|--------|--------|--------|-------|------|
| 649  | thiamazole            | 35 µM  | HL60   | -0.814 | -0.12  | 0.217 | 2570 |
| 626  | genistein             | 10 µM  | MCF7   | -0.814 | -0.132 | 0.205 | 1660 |
| 687  | thiamazole            | 35 µM  | MCF7   | -0.814 | -0.114 | 0.223 | 3898 |
| 688  | memantine             | 19 µM  | PC3    | -0.817 | -0.14  | 0.198 | 4017 |
| 676  | 3-acetamidocoumarin   | 20 µM  | MCF7   | -0.818 | -0.1   | 0.239 | 7361 |
| 687  | CP-320650-01          | 10 µM  | MCF7   | -0.818 | -0.154 | 0.184 | 3905 |
| 771  | dimenhydrinate        | 9 µM   | MCF7   | -0.819 | -0.082 | 0.257 | 7431 |
| 628  | diphenhydramine       | 14 µM  | PC3    | -0.822 | -0.106 | 0.234 | 1830 |
| 725  | fluphenazine          | 10 µM  | MCF7   | -0.824 | -0.15  | 0.191 | 5234 |
| 730  | anisomycin            | 15 µM  | MCF7   | -0.824 | -0.07  | 0.271 | 5364 |
| 626  | valproic acid         | 500 µM | MCF7   | -0.825 | -0.152 | 0.189 | 1665 |
| 642  | fludrocortisone       | 9 µM   | MCF7   | -0.826 | -0.138 | 0.204 | 2328 |
| 1094 | vinblastine           | 100 nM | MCF7   | -0.827 | -0.102 | 0.24  | 7551 |
| 688  | suprofen              | 15 µM  | PC3    | -0.827 | -0.112 | 0.231 | 4005 |
| 725  | sirolimus             | 100 nM | MCF7   | -0.828 | -0.159 | 0.183 | 5239 |
| 505  | celecoxib             | 10 µM  | MCF7   | -0.829 | -0.136 | 0.207 | 922  |
| 627  | naproxen              | 17 µM  | MCF7   | -0.831 | -0.133 | 0.211 | 1706 |
| 636  | dizocilpine           | 12 µM  | MCF7   | -0.834 | -0.124 | 0.221 | 2232 |
| 772  | halofantrine          | 7 µM   | MCF7   | -0.834 | -0.131 | 0.215 | 7469 |
| 671  | cicloheximide         | 14 µM  | MCF7   | -0.836 | -0.083 | 0.263 | 3464 |
| 705  | naringenin            | 15 µM  | MCF7   | -0.838 | -0.137 | 0.21  | 4422 |
| 706  | lasalocid             | 7 µM   | MCF7   | -0.838 | -0.183 | 0.164 | 4985 |
| 670  | levomepromazine       | 9 µM   | MCF7   | -0.839 | -0.139 | 0.208 | 3440 |
| 736  | S-propranolol         | 14 µM  | MCF7   | -0.84  | -0.104 | 0.243 | 5444 |
| 747  | fendiline             | 11 µM  | MCF7   | -0.841 | -0.121 | 0.228 | 7188 |
| 504  | geldanamycin          | 1 µM   | MCF7   | -0.842 | -0.193 | 0.155 | 864  |
| 672  | lasalocid             | 7 µM   | MCF7   | -0.842 | -0.147 | 0.201 | 3360 |
| 735  | nimodipine            | 10 µM  | MCF7   | -0.845 | -0.092 | 0.258 | 5421 |
| 514  | BW-B70C               | 32 µM  | MCF7   | -0.846 | -0.161 | 0.189 | 1132 |
| 685  | benzamil              | 11 µM  | MCF7   | -0.846 | -0.155 | 0.195 | 3635 |
| 661  | rilmnidine            | 8 µM   | HL60   | -0.847 | -0.138 | 0.213 | 3133 |
| 676  | decamethonium bromide | 10 µM  | MCF7   | -0.848 | -0.124 | 0.227 | 7353 |
| 663  | cinchonine            | 14 µM  | MCF7   | -0.848 | -0.117 | 0.234 | 2789 |
| 690  | nadolol               | 13 µM  | MCF7   | -0.853 | -0.152 | 0.201 | 4139 |
| 665  | proguanil             | 14 µM  | HL60   | -0.853 | -0.11  | 0.243 | 2944 |
| 38   | dexamethasone         | 1 µM   | ssMCF7 | -0.854 | -0.167 | 0.187 | 374  |
| 602  | sirolimus             | 100 nM | HL60   | -0.855 | -0.118 | 0.236 | 1183 |



|      |                             |            |      |        |        |       |      |
|------|-----------------------------|------------|------|--------|--------|-------|------|
| 752  | podophyllotoxin             | 10 $\mu$ M | MCF7 | -0.858 | -0.185 | 0.171 | 6103 |
| 629  | chlorpromazine              | 11 $\mu$ M | HL60 | -0.858 | -0.085 | 0.27  | 1864 |
| 676  | zuclopenthixol              | 9 $\mu$ M  | MCF7 | -0.863 | -0.181 | 0.176 | 7356 |
| 653  | estradiol                   | 15 $\mu$ M | MCF7 | -0.864 | -0.154 | 0.204 | 2653 |
| 629  | metformin                   | 24 $\mu$ M | HL60 | -0.866 | -0.091 | 0.267 | 1858 |
| 690  | benzathine benzylpenicillin | 4 $\mu$ M  | MCF7 | -0.867 | -0.169 | 0.19  | 4140 |
| 757  | trifluoperazine             | 10 $\mu$ M | MCF7 | -0.868 | -0.178 | 0.181 | 5584 |
| 633  | lynestrenol                 | 14 $\mu$ M | MCF7 | -0.87  | -0.14  | 0.22  | 1537 |
| 514  | phentolamine                | 12 $\mu$ M | MCF7 | -0.872 | -0.135 | 0.226 | 1138 |
| 663  | Prestwick-691               | 14 $\mu$ M | MCF7 | -0.874 | -0.119 | 0.243 | 2813 |
| 706  | methyldopate                | 15 $\mu$ M | MCF7 | -0.875 | -0.132 | 0.23  | 4986 |
| 633  | azacyclonol                 | 15 $\mu$ M | MCF7 | -0.879 | -0.144 | 0.22  | 1520 |
| 653  | anisomycin                  | 15 $\mu$ M | MCF7 | -0.88  | -0.108 | 0.256 | 2658 |
| 655  | cephaeline                  | 6 $\mu$ M  | MCF7 | -0.88  | -0.11  | 0.254 | 3290 |
| 676  | harpagoside                 | 8 $\mu$ M  | MCF7 | -0.88  | -0.131 | 0.234 | 7355 |
| 636  | gentamicin                  | 3 $\mu$ M  | MCF7 | -0.881 | -0.15  | 0.215 | 2245 |
| 747  | isoniazid                   | 29 $\mu$ M | MCF7 | -0.885 | -0.133 | 0.234 | 7197 |
| 741  | ribavirin                   | 16 $\mu$ M | MCF7 | -0.887 | -0.129 | 0.238 | 6018 |
| 1079 | thapsigargin                | 100 nM     | PC3  | -0.897 | -0.14  | 0.231 | 7103 |
| 745  | (+)-chelidone               | 11 $\mu$ M | MCF7 | -0.897 | -0.148 | 0.223 | 6236 |
| 676  | alprostadil                 | 11 $\mu$ M | MCF7 | -0.901 | -0.164 | 0.21  | 7358 |
| 642  | vincamine                   | 11 $\mu$ M | MCF7 | -0.904 | -0.164 | 0.21  | 2327 |
| 672  | nadolol                     | 13 $\mu$ M | MCF7 | -0.91  | -0.163 | 0.214 | 3359 |
| 706  | methoxamine                 | 16 $\mu$ M | MCF7 | -0.911 | -0.133 | 0.245 | 4972 |
| 726  | cephaeline                  | 6 $\mu$ M  | MCF7 | -0.914 | -0.135 | 0.243 | 5247 |
| 707  | diloxanide                  | 12 $\mu$ M | MCF7 | -0.914 | -0.16  | 0.218 | 5025 |
| 771  | fenofibrate                 | 11 $\mu$ M | MCF7 | -0.915 | -0.179 | 0.199 | 7432 |
| 648  | podophyllotoxin             | 10 $\mu$ M | HL60 | -0.915 | -0.151 | 0.227 | 2540 |
| 691  | trimethobenzamide           | 9 $\mu$ M  | MCF7 | -0.926 | -0.158 | 0.225 | 4180 |
| 690  | canadine                    | 12 $\mu$ M | MCF7 | -0.933 | -0.151 | 0.236 | 4138 |
| 673  | diloxanide                  | 12 $\mu$ M | MCF7 | -0.947 | -0.171 | 0.222 | 3399 |
| 629  | diphenhydramine             | 14 $\mu$ M | HL60 | -0.979 | -0.137 | 0.268 | 1871 |
| 751  | lycorine                    | 12 $\mu$ M | MCF7 | -0.991 | -0.091 | 0.319 | 6051 |
| 656  | lovastatin                  | 10 $\mu$ M | MCF7 | -1     | -0.194 | 0.22  | 2854 |

## Supplement Reference

- Bhatlekar, S., Addya, S., Salunek, M., Orr, C. R., Surrey, S., McKenzie, S., Fields, J. Z., and Boman, B. M. (2014). Identification of a developmental gene expression signature, including HOX genes, for the normal human colonic crypt stem cell niche: overexpression of the signature parallels stem cell overpopulation during colon tumorigenesis. *Stem cells and development* 23, 167-179.
- Brun, T., and Gauthier, B. R. (2008). A focus on the role of Pax4 in mature pancreatic islet beta-cell expansion and survival in health and disease. *J Mol Endocrinol* 40, 37-45.
- Dubey, R., and Saini, N. (2015). STAT6 silencing up-regulates cholesterol synthesis via miR-197/FOXJ2 axis and induces ER stress-mediated apoptosis in lung cancer cells. *Biochimica et biophysica acta* 1849, 32-43.
- Fan, Y., Song, X., Du, H., Luo, C., Wang, X., Yang, X., Wang, Y., and Wu, X. (2014). Down-regulation of miR-29c in human bladder cancer and the inhibition of proliferation in T24 cell via PI3K-AKT pathway. *Med Oncol* 31, 65.
- Keniry, M., Pires, M. M., Mense, S., Lefebvre, C., Gan, B., Justiano, K., Lau, Y. K., Hopkins, B., Hodakoski, C., Koujak, S., *et al.* (2013). Survival factor NFIL3 restricts FOXO-induced gene expression in cancer. *Genes & development* 27, 916-927.
- Kuribara, R., Kinoshita, T., Miyajima, A., Shinjyo, T., Yoshihara, T., Inukai, T., Ozawa, K., Look, A. T., and Inaba, T. (1999). Two distinct interleukin-3-mediated signal pathways, Ras-NFIL3 (E4BP4) and Bcl-xL, regulate the survival of murine pro-B lymphocytes. *Mol Cell Biol* 19, 2754-2762.
- Li, F., Li, X. J., Qiao, L., Shi, F., Liu, W., Li, Y., Dang, Y. P., Gu, W. J., Wang, X. G., and Liu, W. (2014). miR-98 suppresses melanoma metastasis through a negative feedback loop with its target gene IL-6. *Exp Mol Med* 46, e116.
- Oh, J. E., Kim, H. J., Kim, W. S., Lee, Z. H., Ryoo, H. M., Hwang, S. J., Lee, Y., and Kim, H. H. (2012). PlexinA2 mediates osteoblast differentiation via regulation of Runx2. *J Bone Miner Res* 27, 552-562.
- Petrocca, F., Visone, R., Onelli, M. R., Shah, M. H., Nicoloso, M. S., de Martino, I., Iliopoulos, D., Pillozzi, E., Liu, C. G., Negrini, M., *et al.* (2008). E2F1-regulated microRNAs impair TGF beta-dependent cell-cycle arrest and apoptosis in gastric cancer. *Cancer Cell* 13, 272-286.
- Rathod, S. S., Rani, S. B., Khan, M., Muzumdar, D., and Shiras, A. (2014). Tumor suppressive miRNA-34a suppresses cell proliferation and tumor growth of glioma stem cells by targeting Akt and Wnt signaling pathways. *FEBS Open Bio* 4, 485-495.
- Senanayake, U., Das, S., Vesely, P., Alzoughbi, W., Frohlich, L. F., Chowdhury, P., Leuschner, I., Hoefler, G., and Guertl, B. (2012). miR-192, miR-194, miR-215, miR-200c and miR-141 are downregulated and their common target ACVR2B is strongly

- expressed in renal childhood neoplasms. *Carcinogenesis* 33, 1014-1021.
- Stephens, W. Z., Senecal, M., Nguyen, M., and Piotrowski, T. (2010). Loss of adenomatous polyposis coli (*apc*) Results in an Expanded Ciliary Marginal Zone in the Zebrafish Eye. *Dev Dynam* 239, 2066-2077.
- Wang, C. Q., Krishnan, V., Tay, L. S., Chin, D. W., Koh, C. P., Chooi, J. Y., Nah, G. S., Du, L., Jacob, B., Yamashita, N., *et al.* (2014). Disruption of *Runx1* and *Runx3* leads to bone marrow failure and leukemia predisposition due to transcriptional and DNA repair defects. *Cell Rep* 8, 767-782.
- Wang, W., Wu, X., and Tian, Y. (2015). Crosstalk of AP4 and TGFbeta receptor signaling in NSCLC. *Tumour Biol* 36, 447-452.
- Yu, Z., Xu, Z., Disante, G., Wright, J., Wang, M., Li, Y., Zhao, Q., Ren, T., Ju, X., Gutman, E., *et al.* (2014). miR-17/20 sensitization of breast cancer cells to chemotherapy-induced apoptosis requires Akt1. *Oncotarget* 5, 1083-1090.
